# Supplementary material for: Synthesis and Characterization of Novel Heterocyclic Chalcones from 1-Phenyl-1H-pyrazol-3-ol
Source: MDPI journal article supplement (doi:10.3390/molecules27123752), 2022-06-10
Supplement: s1 [file s1]

## Supplementary Material

### **Synthesis and Characterization of Novel Heterocyclic Chalcones from 1-Phenyl-1*H*-pyrazol-3-ol**

Arminas Urbonavičius<sup>1,3</sup>, Graziana Fortunato<sup>1,2</sup>, Emilija Ambrazaitytė<sup>1</sup>, Elena Plytninkienė<sup>1,3</sup>, Aurimas Bieliauskas<sup>3</sup>, Vaida Milišiūnaitė<sup>1,3</sup>, Renzo Luisi<sup>2</sup>, Eglė Arbačiauskienė<sup>1\*</sup>, Sonata Krikštolaitytė<sup>1</sup>, Algirdas Šačkus<sup>1,3\*</sup>

<sup>1</sup>Department of Organic Chemistry, Kaunas University of Technology, Radvilėnų pl. 19, LT-50254 Kaunas, Lithuania

<sup>2</sup>Department of Pharmacy - Drug Sciences, University of Bari "Aldo Moro", Via E. Orabona 4, I- 70125 Bari, Italy

<sup>3</sup>Institute of Synthetic Chemistry, Kaunas University of Technology, K. Baršausko g. 59, LT-51423 Kaunas, Lithuania

\* Corresponding authors

E-mail address: algirdas.sackus@ktu.lt (A. Šačkus), egle.arbaciauskiene@ktu.lt (E. Arbačiauskienė)

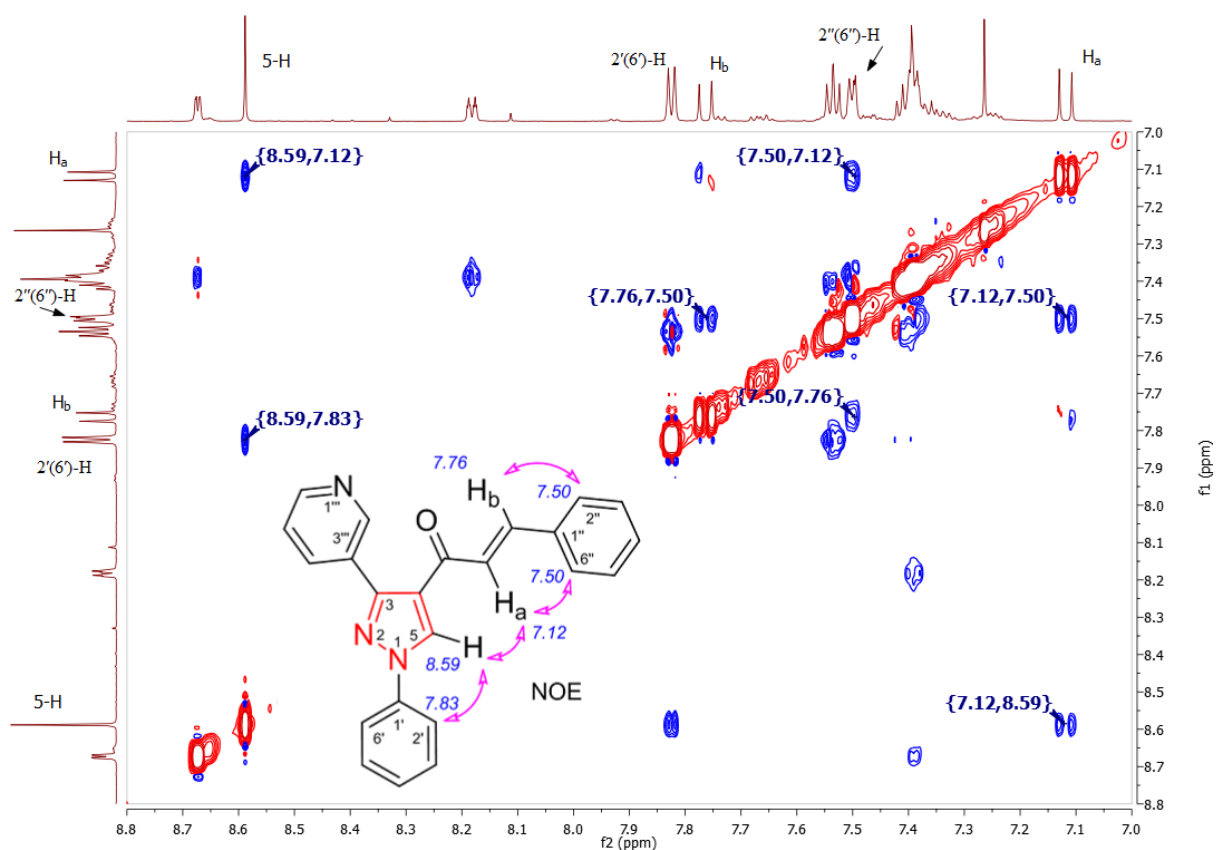

**Figure S1.  $^1\text{H}$ - $^1\text{H}$  NOESY NMR spectrum (*E*-12a, *Z*-13a) (700 MHz,  $\text{CDCl}_3$ )**

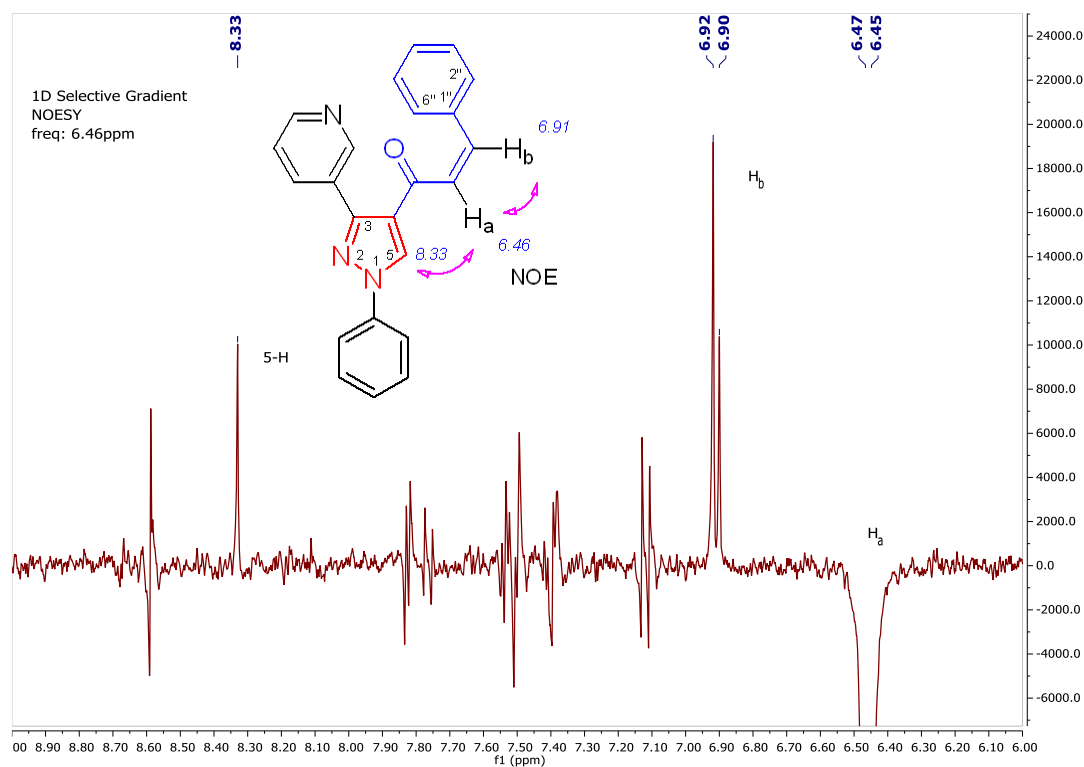

**Figure S2. 1D Selective Gradient NOESY spectrum (*E*-12a, *Z*-13a) (700 MHz,  $\text{CDCl}_3$ )**

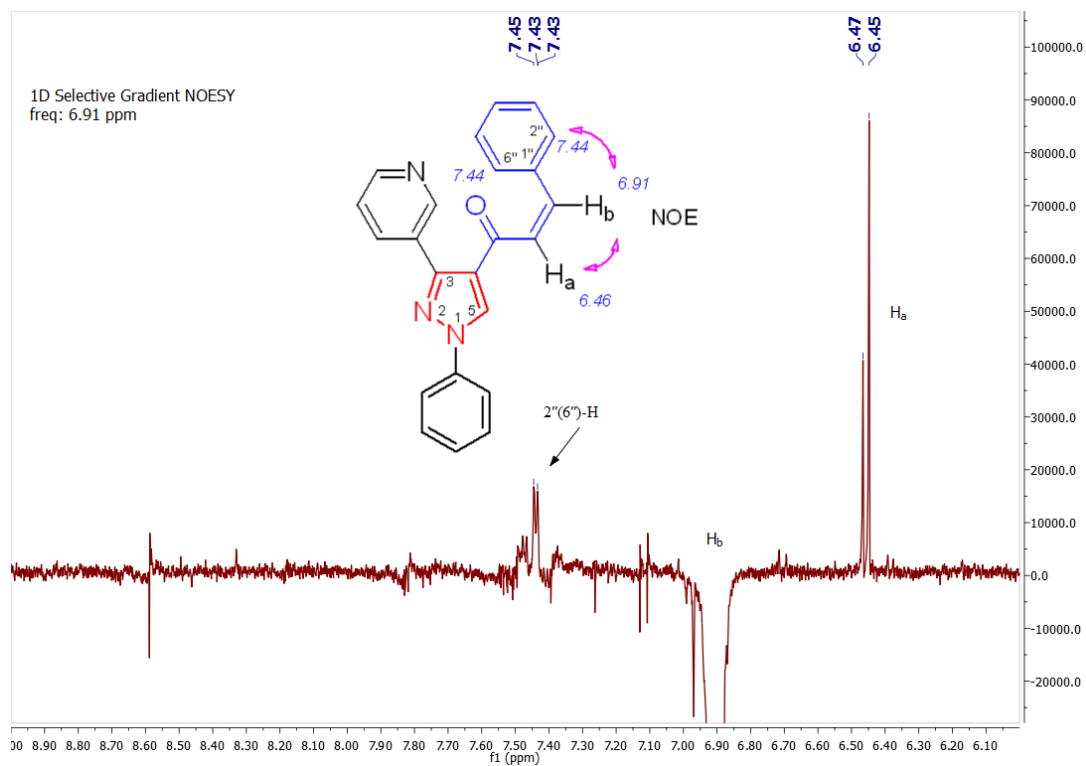

**Figure S3.** 1D Selective Gradient NOESY spectrum (*E*-12a, *Z*-13a) (700 MHz,  $CDCl_3$ )

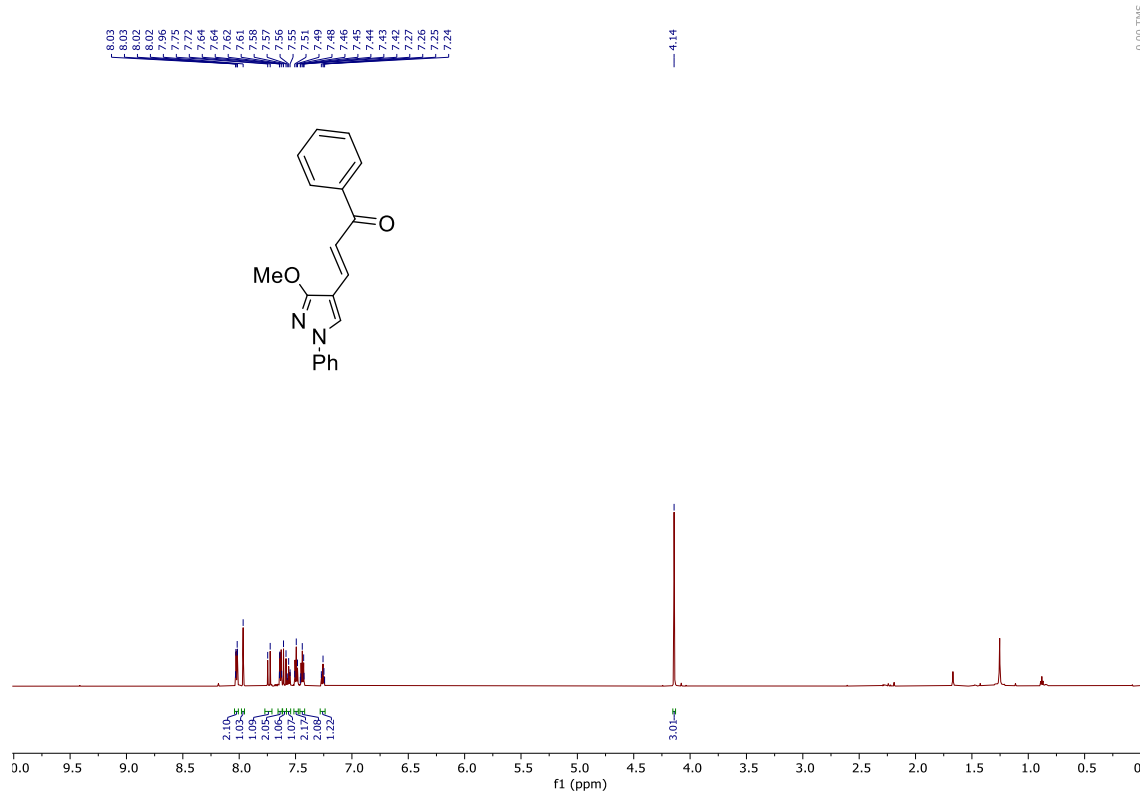

**Figure S4.** (*2E*)-3-[3-(Methoxy)-1-phenyl-1*H*-pyrazol-4-yl]-1-phenylprop-2-en-1-one (4a).  $^1H$  NMR spectrum (700 MHz,  $CDCl_3$ )

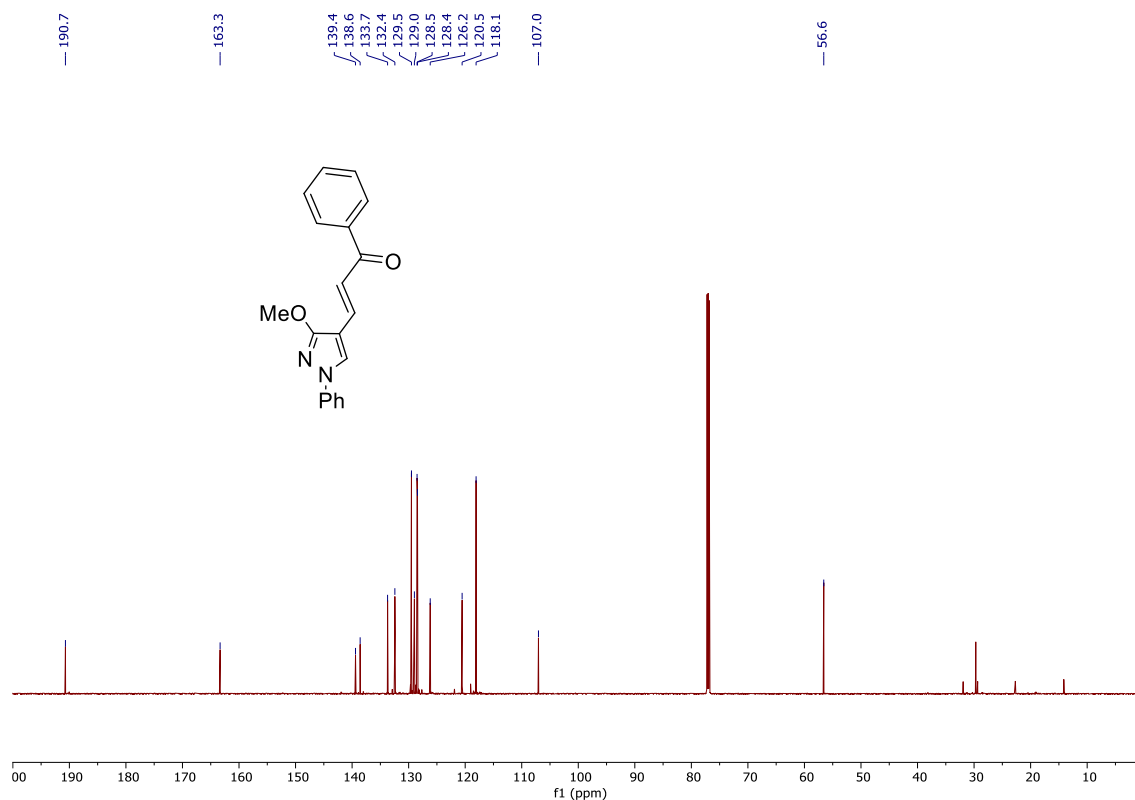

**Figure S5. (2E)-3-[3-(Methoxy)-1-phenyl-1H-pyrazol-4-yl]-1-phenylprop-2-en-1-one (4a). <sup>13</sup>C NMR spectrum (176 MHz, CDCl<sub>3</sub>)**

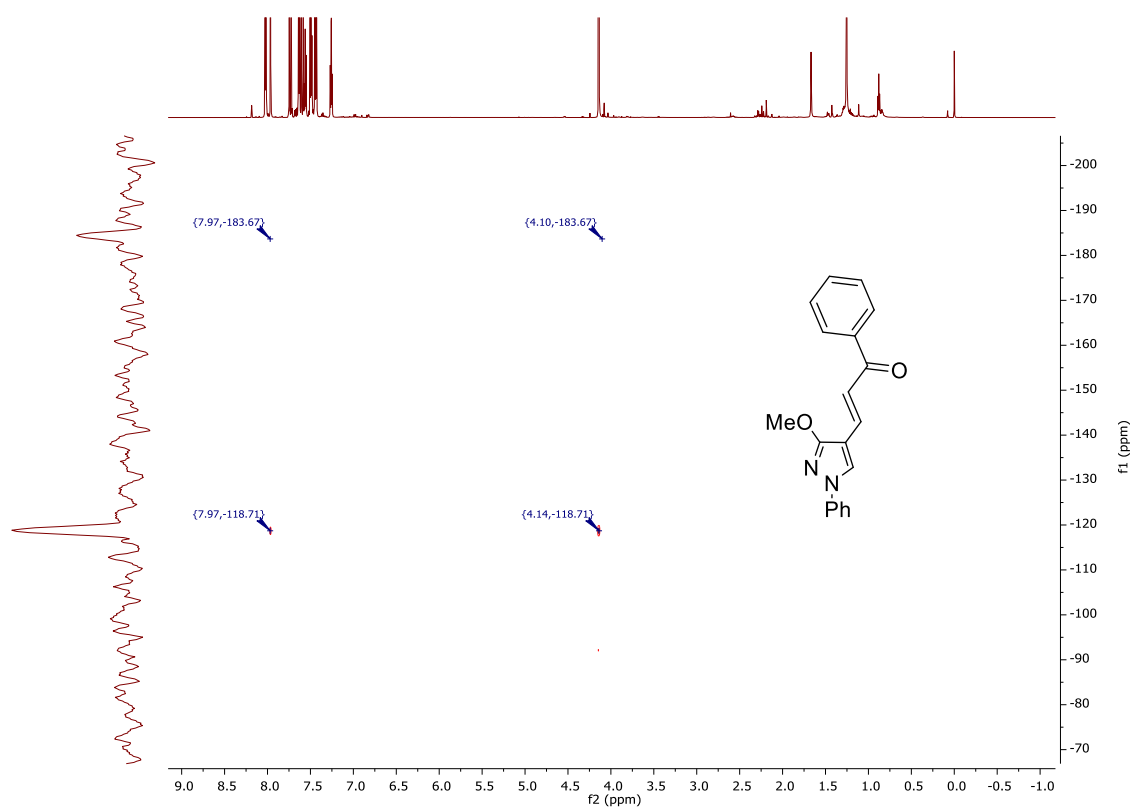

**Figure S6. (2E)-3-[3-(Methoxy)-1-phenyl-1H-pyrazol-4-yl]-1-phenylprop-2-en-1-one (4a). <sup>1</sup>H-<sup>15</sup>N HMBC NMR spectrum (71 MHz, CDCl<sub>3</sub>)**



+MS, 7.1min #423

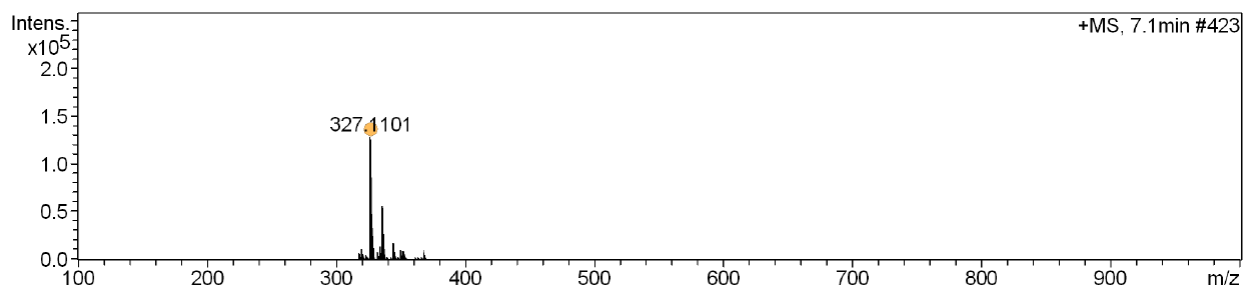

| Meas. m/z | # | Ion Formula                                                     | m/z      | err [ppm] | mSigma | # Sigma | Score  | rdb  | e <sup>-</sup> | Conf | N-Rule |
|-----------|---|-----------------------------------------------------------------|----------|-----------|--------|---------|--------|------|----------------|------|--------|
| 327.1101  | 1 | C <sub>19</sub> H <sub>16</sub> N <sub>2</sub> NaO <sub>2</sub> | 327.1104 | 1.0       | 7.3    | 2       | 100.00 | 12.5 | even           |      | ok     |

**Figure S7. (2E)-3-[3-(Methoxy)-1-phenyl-1H-pyrazol-4-yl]-1-phenylprop-2-en-1-one (4a). HRMS (ESI-TOF).**

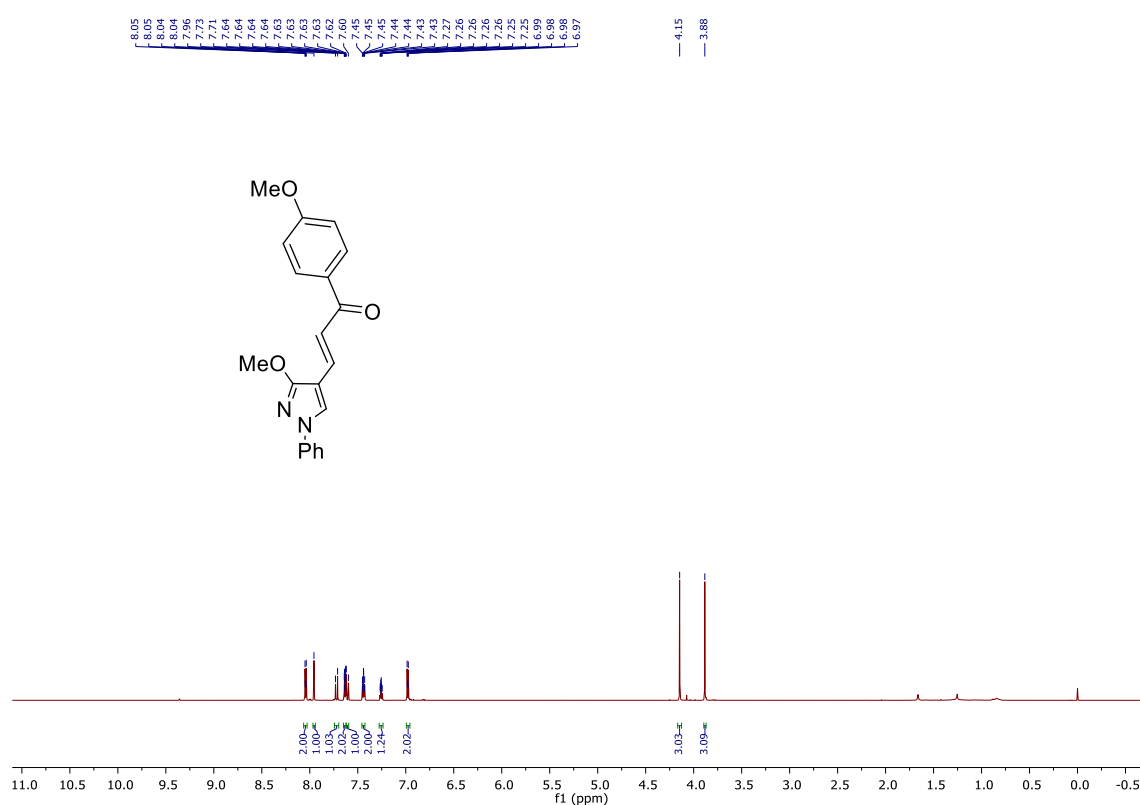

**Figure S8. (2E)-1-(4-Methoxyphenyl)-3-(3-methoxy-1-phenyl-1H-pyrazol-4-yl)prop-2-en-1-one (4b). <sup>1</sup>H NMR spectrum (700 MHz, CDCl<sub>3</sub>)**

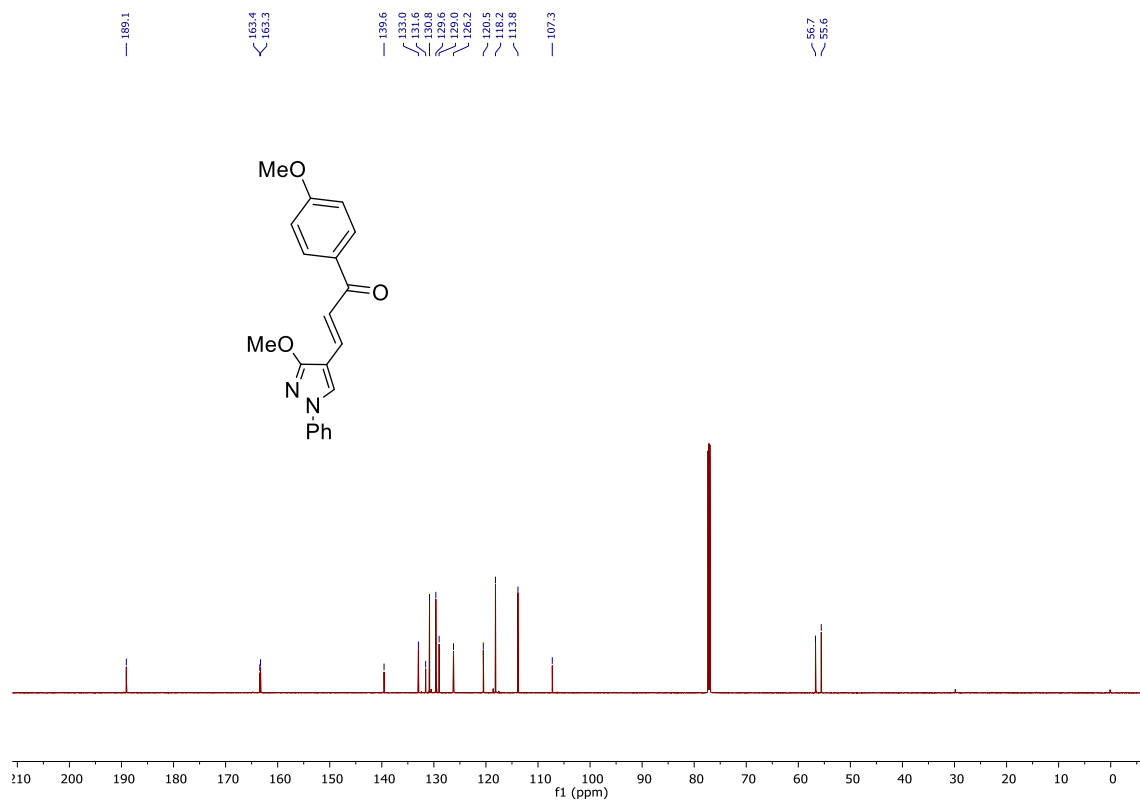

**Figure S9.** (2E)-1-(4-Methoxyphenyl)-3-(3-methoxy-1-phenyl-1H-pyrazol-4-yl)prop-2-en-1-one (4b). <sup>13</sup>C NMR spectrum (176 MHz, CDCl<sub>3</sub>)

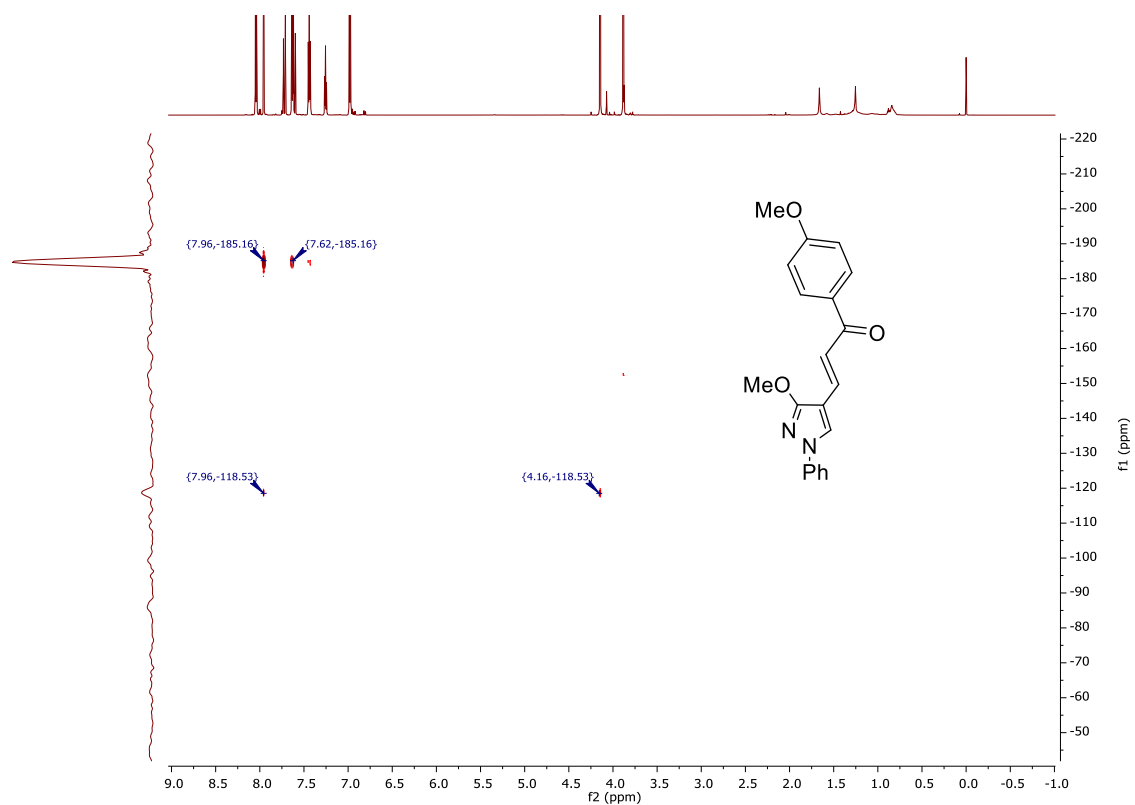

**Figure S10.** (2E)-1-(4-Methoxyphenyl)-3-(3-methoxy-1-phenyl-1H-pyrazol-4-yl)prop-2-en-1-one (4b). <sup>1</sup>H-<sup>15</sup>N HMBC NMR spectrum (71 MHz, CDCl<sub>3</sub>)

+MS, 6.0min #357

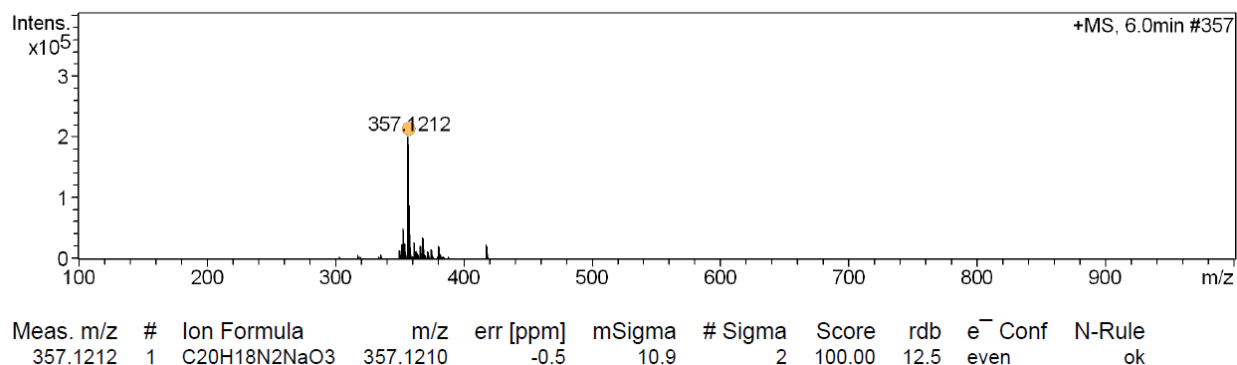

**Figure S11. (2E)-1-(4-Methoxyphenyl)-3-(3-methoxy-1-phenyl-1H-pyrazol-4-yl)prop-2-en-1-one (4b). HRMS (ESI-TOF).**

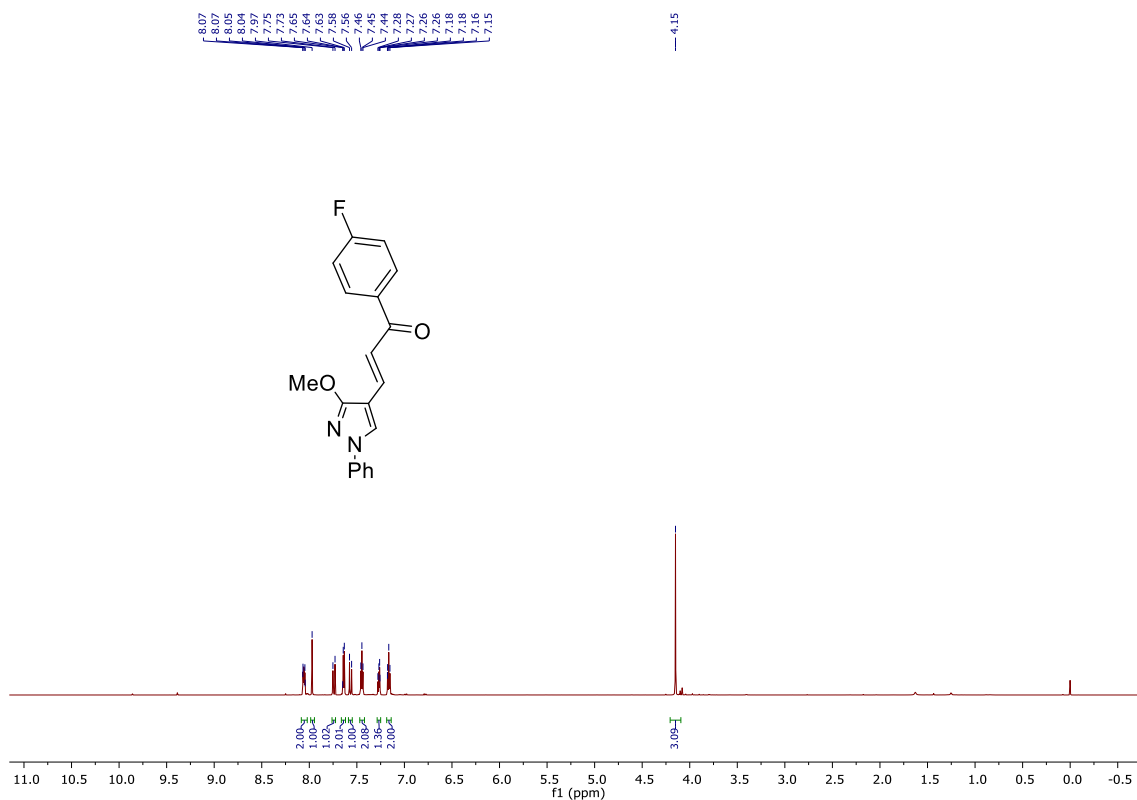

**Figure S12. (2E)-1-(4-Fluorophenyl)-3-(3-methoxy-1-phenyl-1H-pyrazol-4-yl)prop-2-en-1-one (4c). <sup>1</sup>H NMR spectrum (700 MHz, CDCl<sub>3</sub>)**

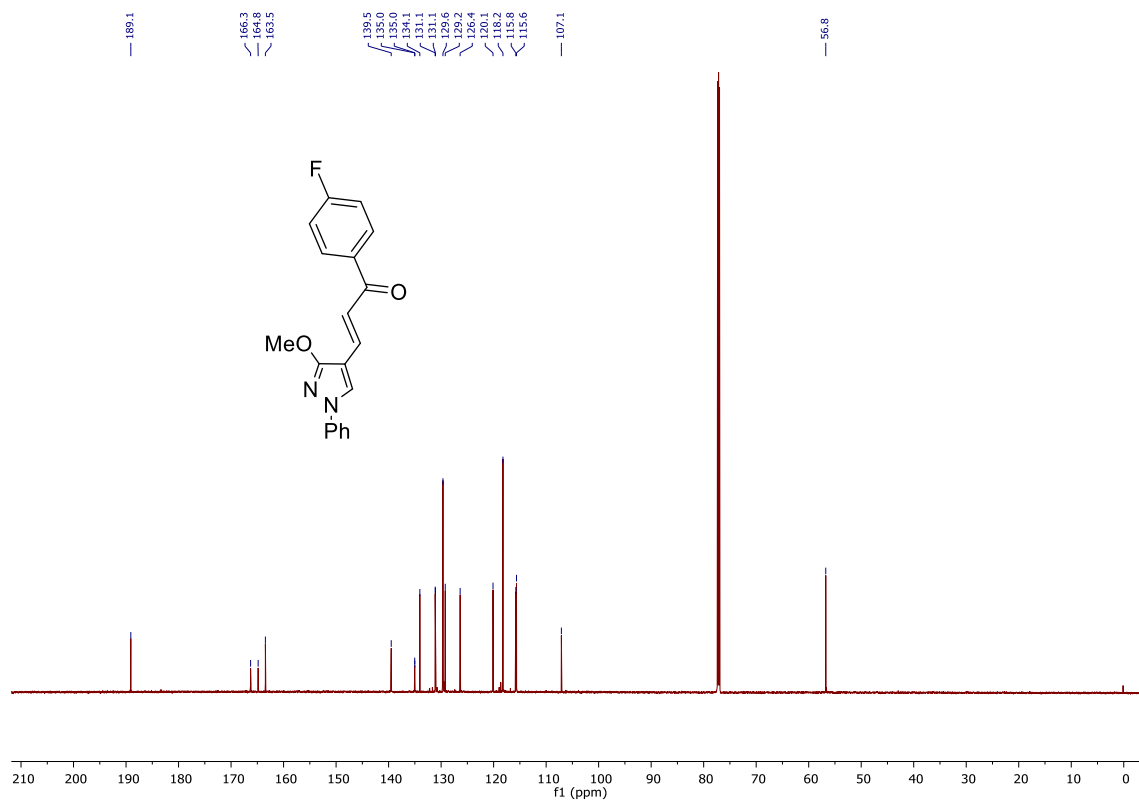

**Figure S13.** (2E)-1-(4-Fluorophenyl)-3-(3-methoxy-1-phenyl-1H-pyrazol-4-yl)prop-2-en-1-one (4c). <sup>13</sup>C NMR spectrum (176 MHz, CDCl<sub>3</sub>)

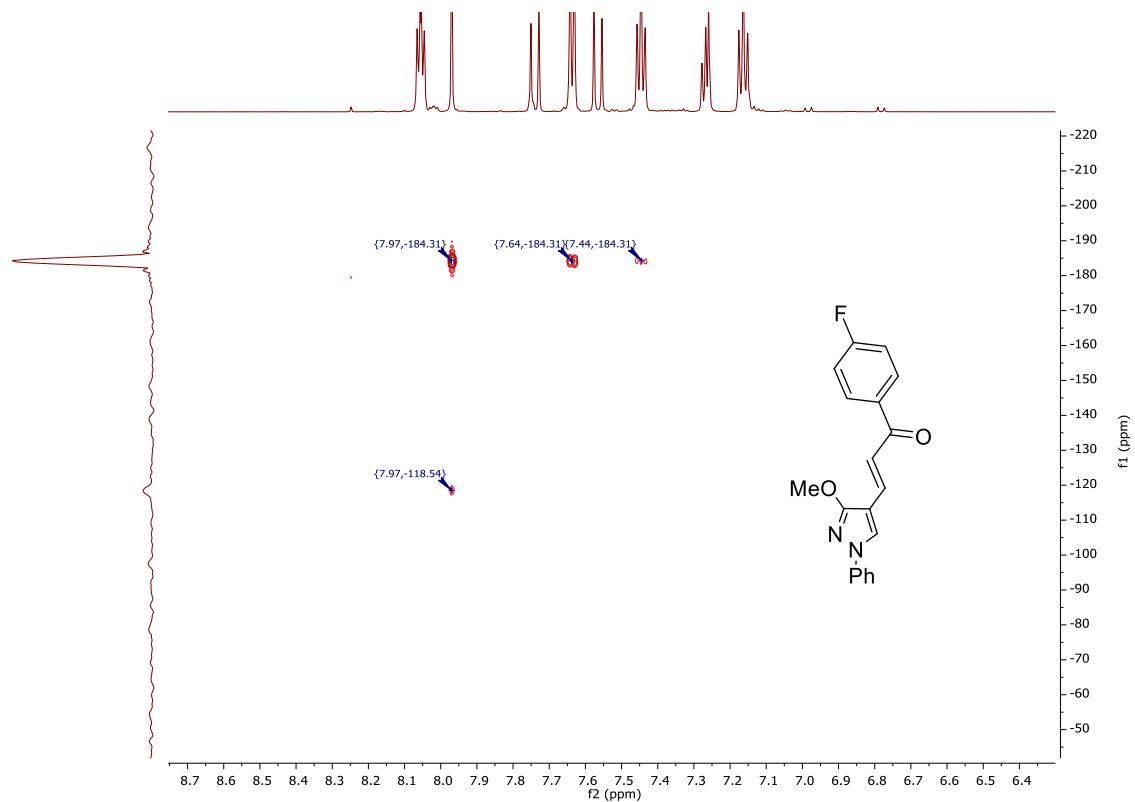

**Figure S14.** (2E)-1-(4-Fluorophenyl)-3-(3-methoxy-1-phenyl-1H-pyrazol-4-yl)prop-2-en-1-one (4c). <sup>1</sup>H-<sup>15</sup>N HMBC NMR spectrum (71 MHz, CDCl<sub>3</sub>)

+MS, 7.7min #459

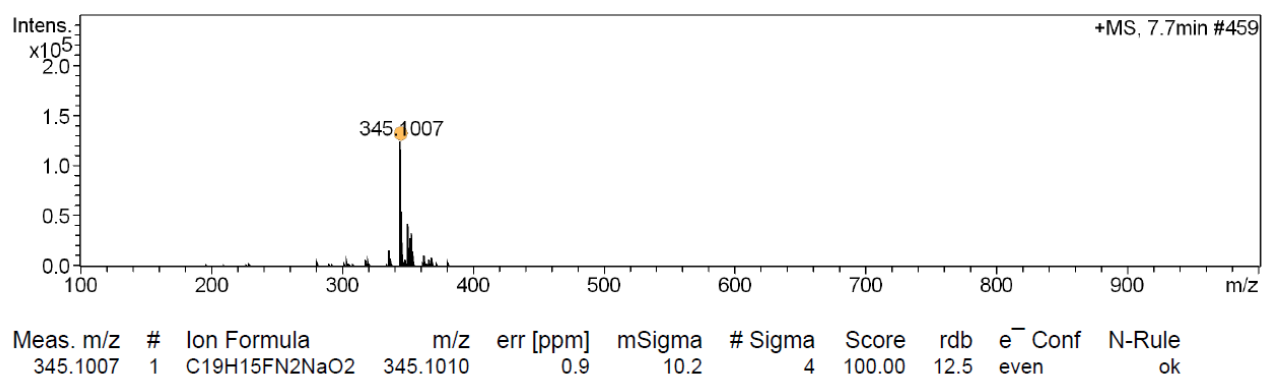

**Figure S15. (2E)-1-(4-Fluorophenyl)-3-(3-methoxy-1-phenyl-1H-pyrazol-4-yl)prop-2-en-1-one (4c). HRMS (ESI-TOF).**

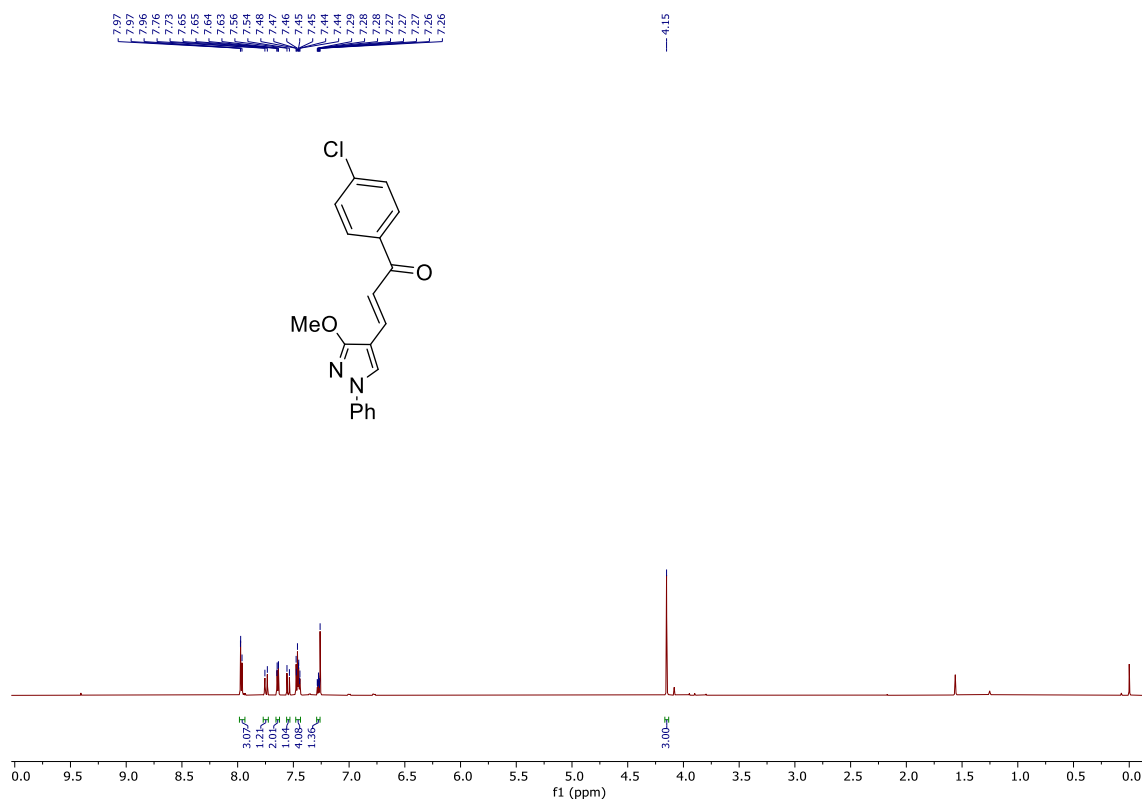

**Figure S16. (2E)-1-(4-Chlorophenyl)-3-(3-methoxy-1-phenyl-1H-pyrazol-4-yl)prop-2-en-1-one (4d). <sup>1</sup>H NMR spectrum (700 MHz, CDCl<sub>3</sub>)**

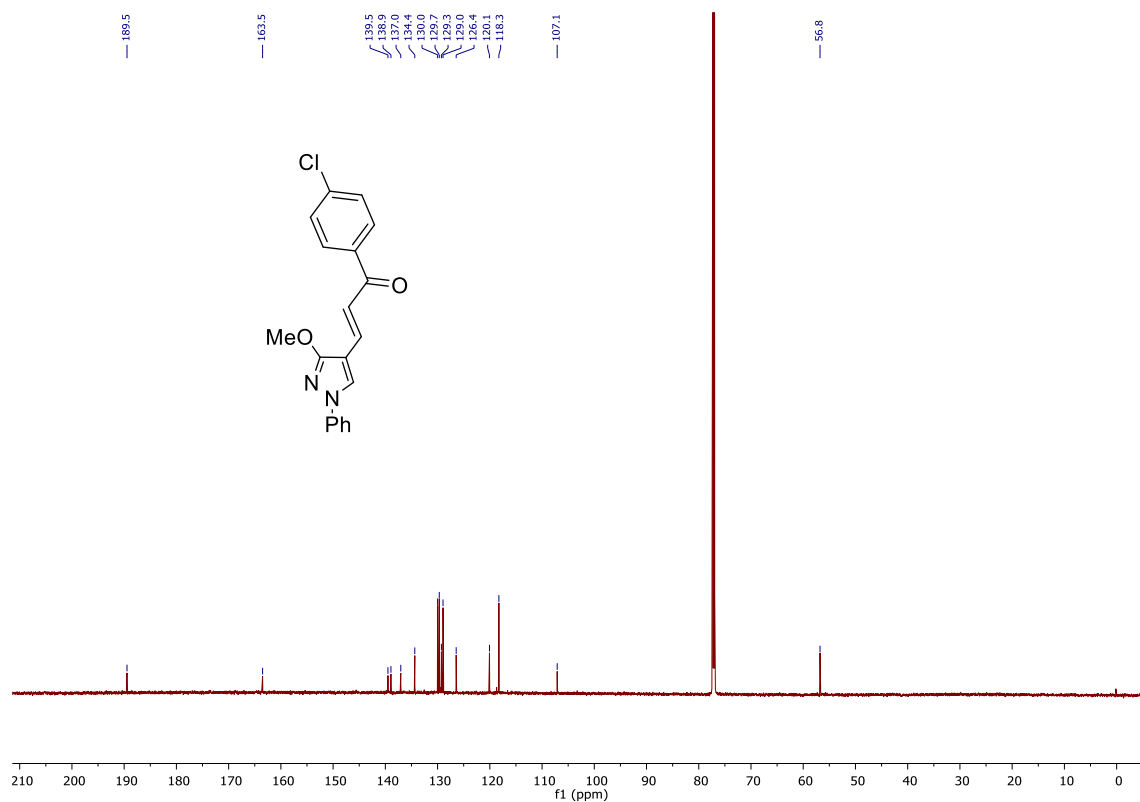

**Figure S17.** (2E)-1-(4-Chlorophenyl)-3-(3-methoxy-1-phenyl-1H-pyrazol-4-yl)prop-2-en-1-one (4d). <sup>13</sup>C NMR spectrum (176 MHz, CDCl<sub>3</sub>)

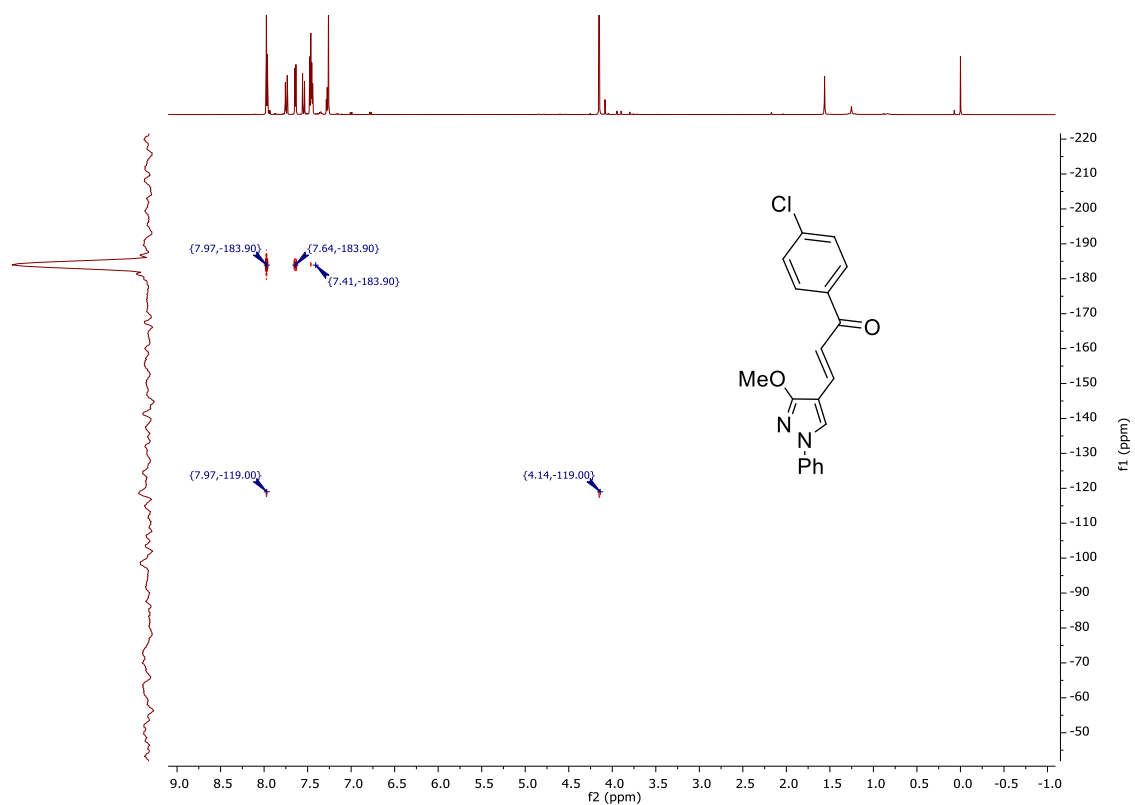

**Figure S18.** (2E)-1-(4-Chlorophenyl)-3-(3-methoxy-1-phenyl-1H-pyrazol-4-yl)prop-2-en-1-one (4d). <sup>1</sup>H-<sup>15</sup>N HMBC NMR spectrum (71 MHz, CDCl<sub>3</sub>)

+MS, 11.6min #693

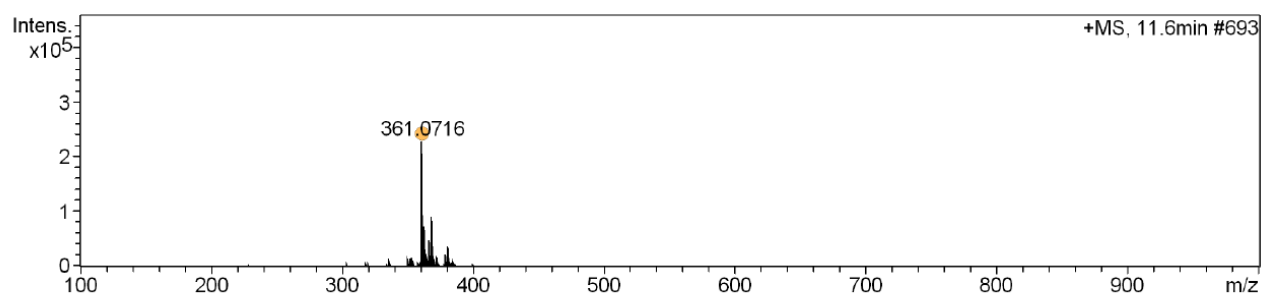

| Meas. m/z | # | Ion Formula                                                       | m/z      | err [ppm] | mSigma | # Sigma | Score  | rdb  | e <sup>-</sup> | Conf | N-Rule |
|-----------|---|-------------------------------------------------------------------|----------|-----------|--------|---------|--------|------|----------------|------|--------|
| 361.0716  | 1 | C <sub>19</sub> H <sub>15</sub> ClN <sub>2</sub> NaO <sub>2</sub> | 361.0714 | 0.4       | 12.0   | 1       | 100.00 | 12.5 | even           |      | ok     |

**Figure S19. (2E)-1-(4-Chlorophenyl)-3-(3-methoxy-1-phenyl-1H-pyrazol-4-yl)prop-2-en-1-one (4d). HRMS (ESI-TOF).**

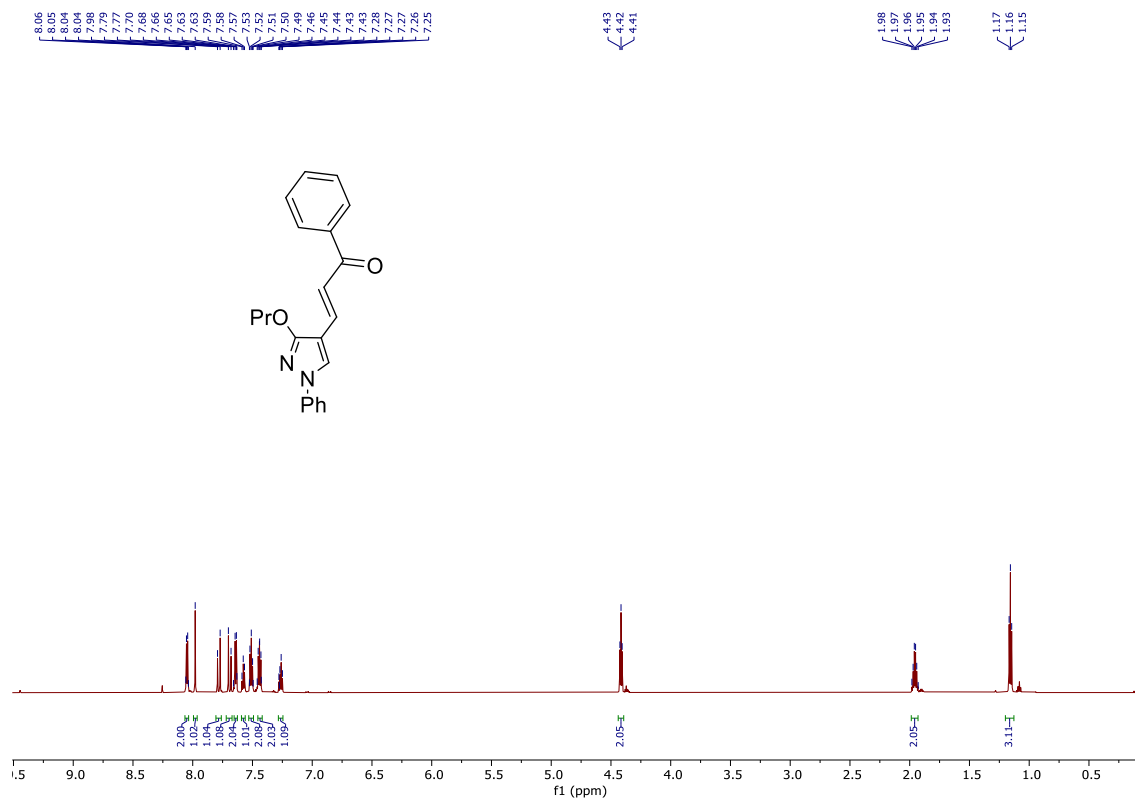

**Figure S20. (2E)-1-Phenyl-3-(1-phenyl-3-propoxy-1H-pyrazol-4-yl)prop-2-en-1-one (4e). <sup>1</sup>H NMR spectrum (700 MHz, CDCl<sub>3</sub>)**

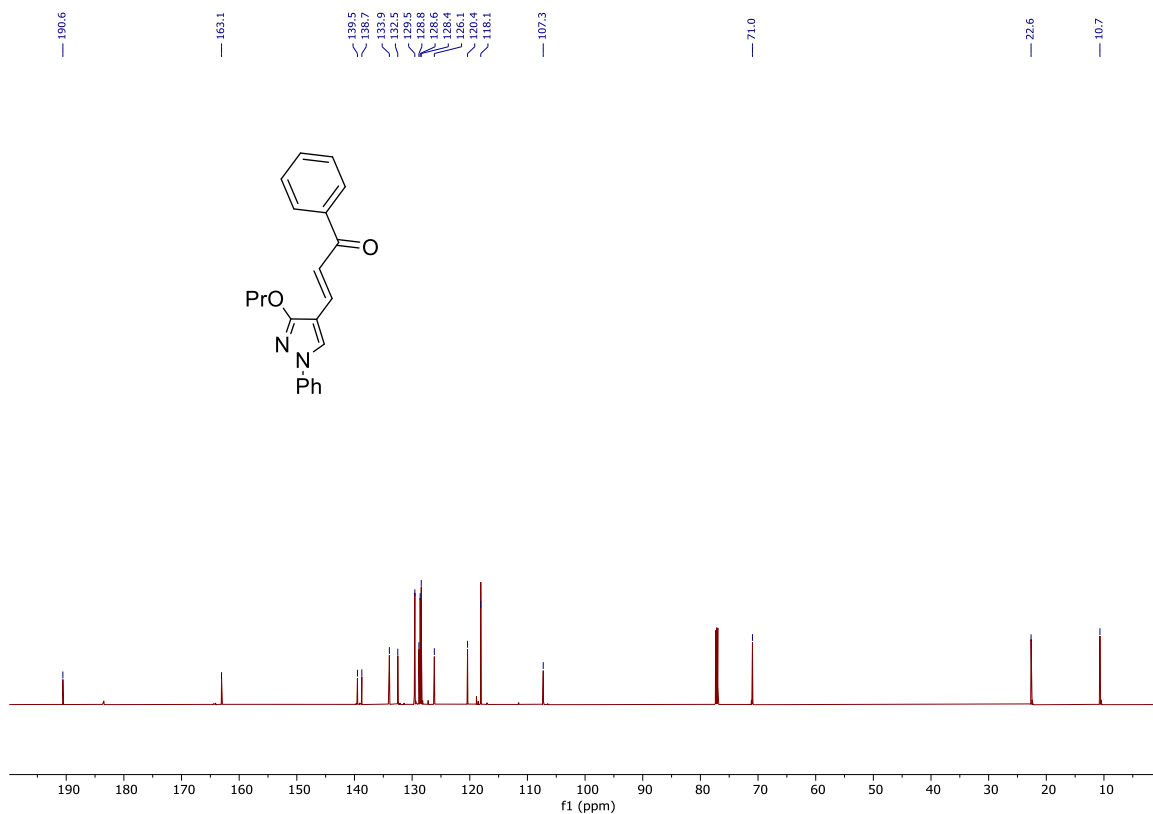

**Figure S21. (2E)-1-Phenyl-3-(1-phenyl-3-propoxy-1H-pyrazol-4-yl)prop-2-en-1-one (4e). <sup>13</sup>C NMR spectrum (176 MHz, CDCl<sub>3</sub>)**

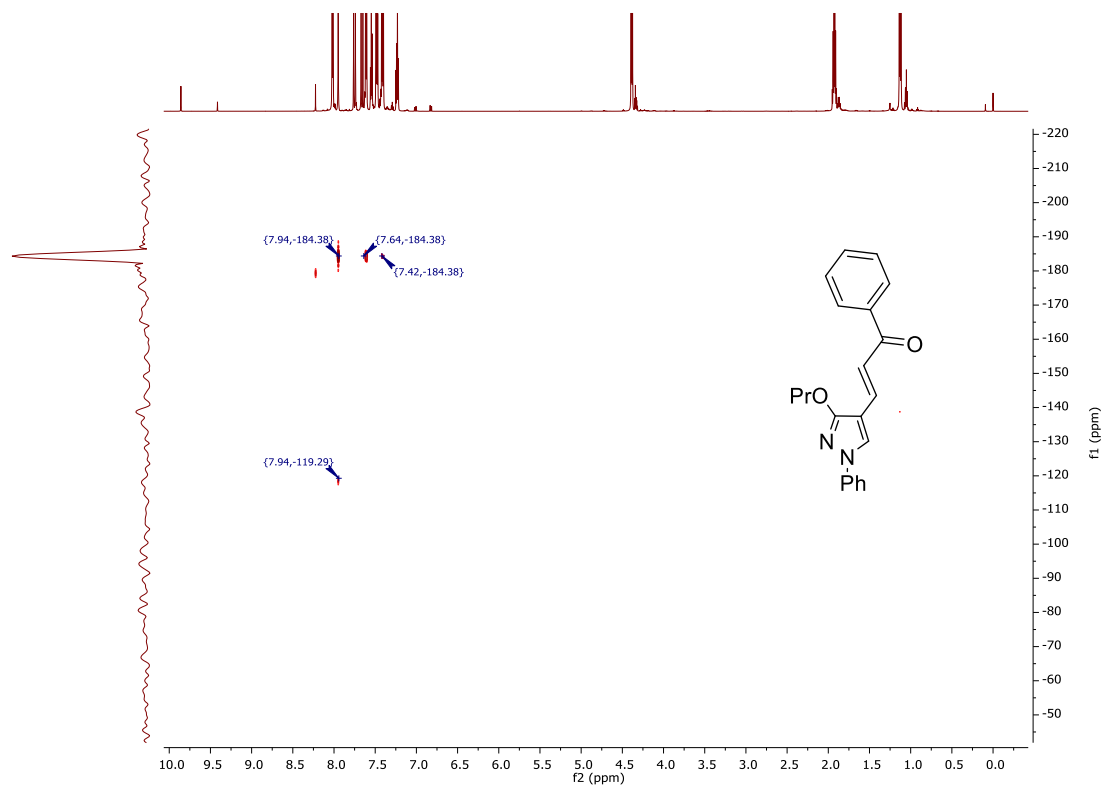

**Figure S22. (2E)-1-Phenyl-3-(1-phenyl-3-propoxy-1H-pyrazol-4-yl)prop-2-en-1-one (4e). <sup>1</sup>H-<sup>15</sup>N HMBC NMR spectrum (71 MHz, CDCl<sub>3</sub>)**



+MS, 3.1min #181

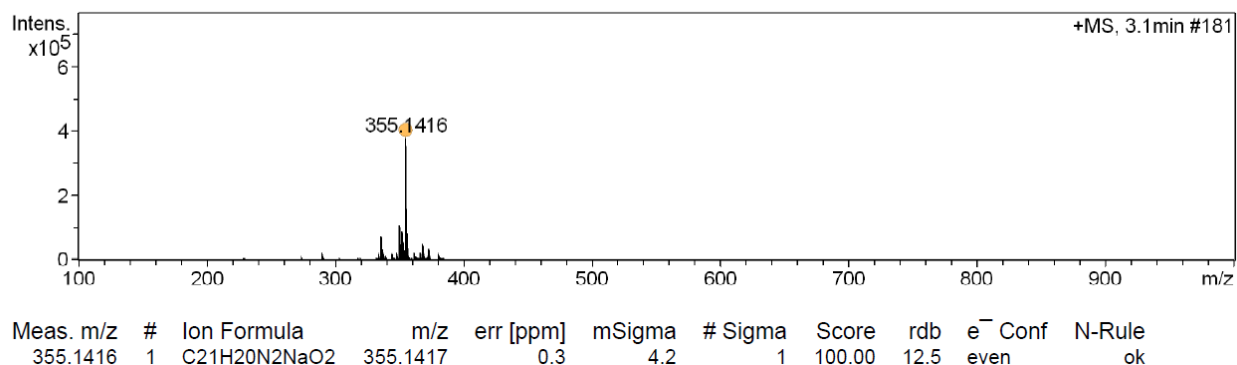

**Figure S23. (2E)-1-Phenyl-3-(1-phenyl-3-propoxy-1H-pyrazol-4-yl)prop-2-en-1-one (4e). HRMS (ESI-TOF).**

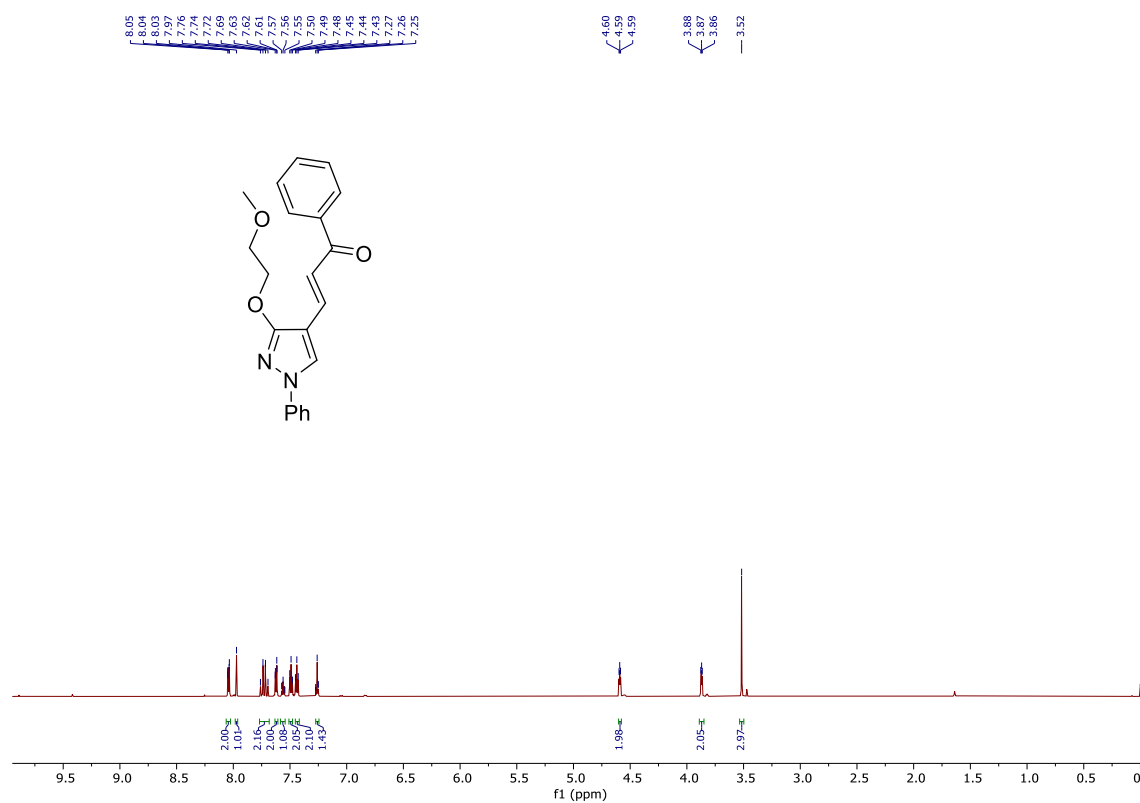

**Figure S24. (2E)-3-[3-(2-Methoxyethoxy)-1-phenyl-1H-pyrazol-4-yl]-1-phenylprop-2-en-1-one (4f). <sup>1</sup>H NMR spectrum (700 MHz, CDCl<sub>3</sub>)**

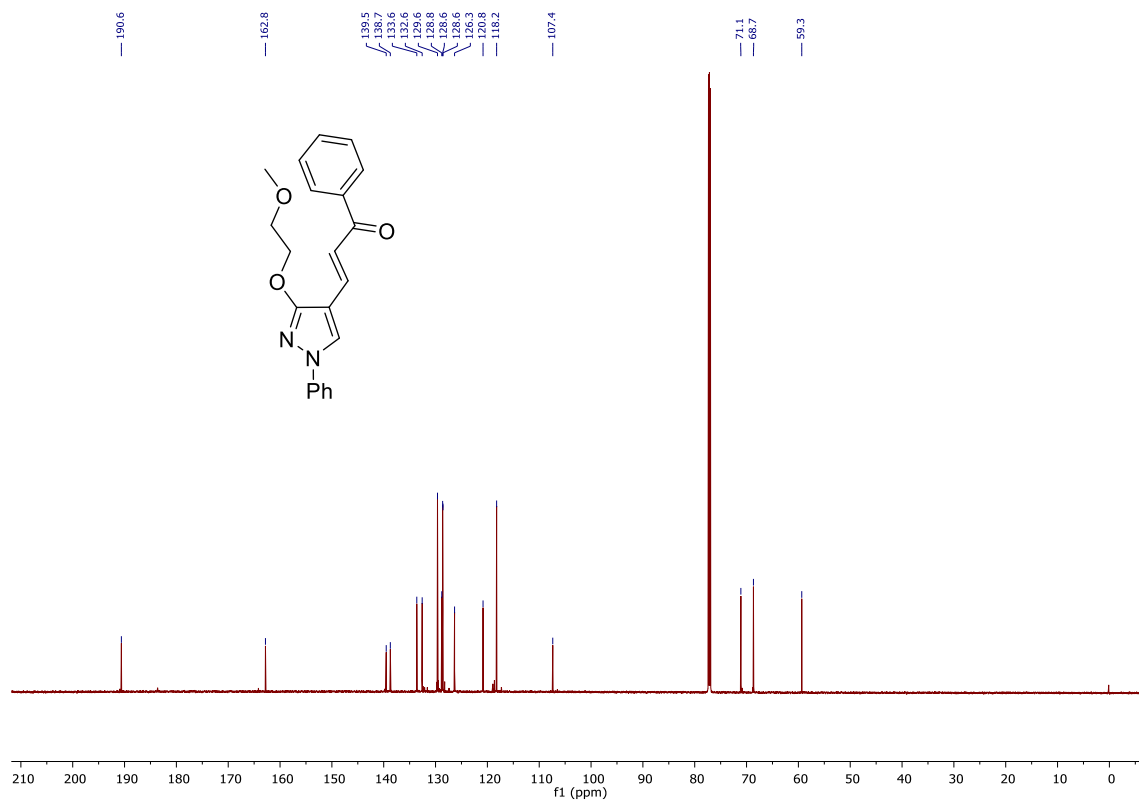

**Figure S25.** (2E)-3-[3-(2-Methoxyethoxy)-1-phenyl-1H-pyrazol-4-yl]-1-phenylprop-2-en-1-one (4f). <sup>13</sup>C NMR spectrum (CDCl<sub>3</sub>)

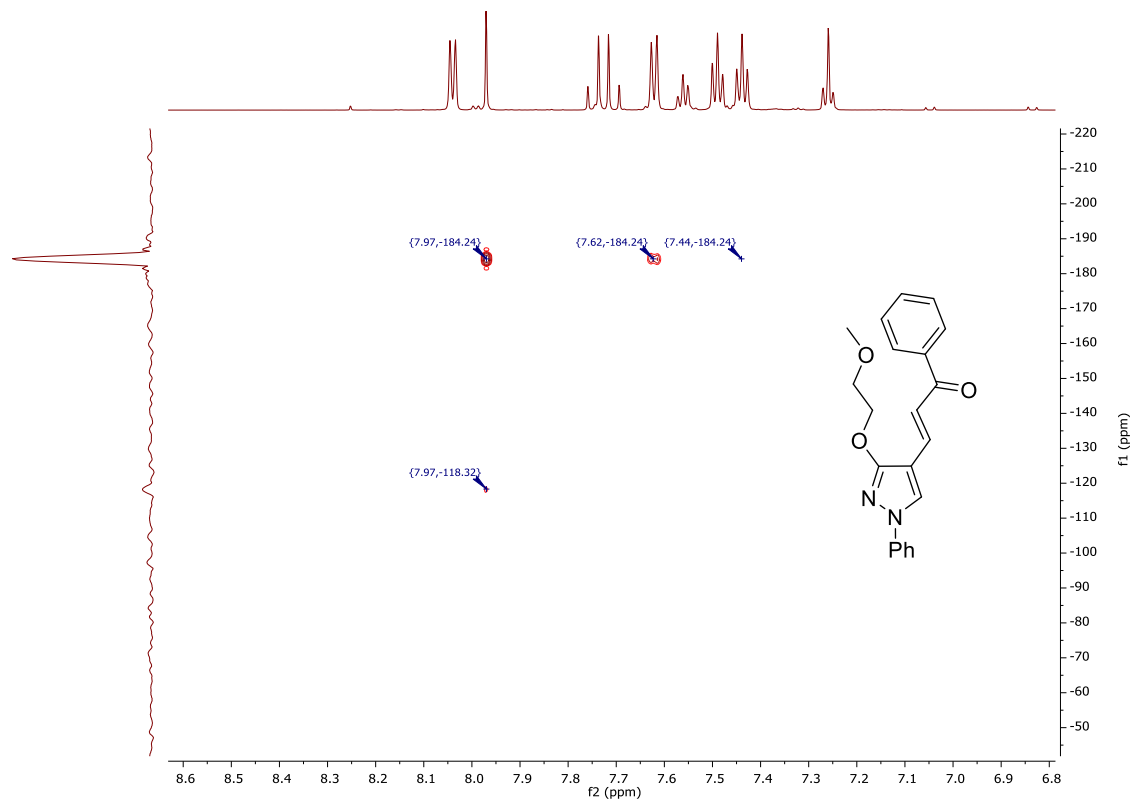

**Figure S26.** (2E)-3-[3-(2-Methoxyethoxy)-1-phenyl-1H-pyrazol-4-yl]-1-phenylprop-2-en-1-one (4f). <sup>1</sup>H-<sup>15</sup>N HMBC NMR spectrum (71 MHz, CDCl<sub>3</sub>)

+MS, 7.3min #436

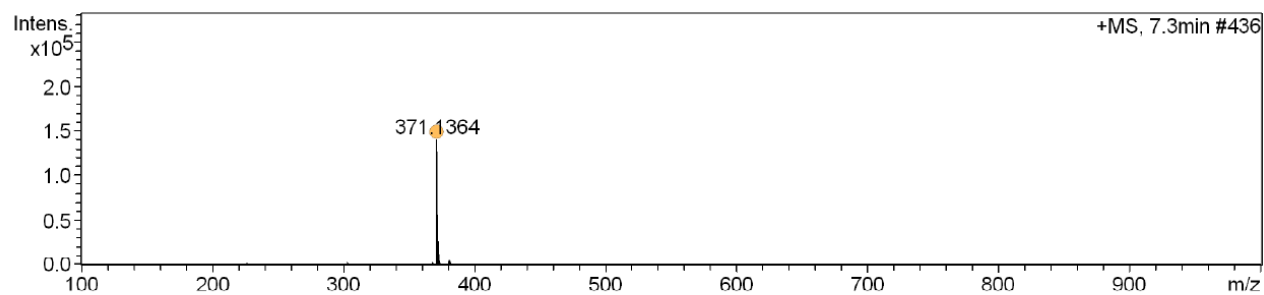

| Meas. m/z | # | Ion Formula  | m/z      | err [ppm] | mSigma | # Sigma | Score  | rdb  | e <sup>-</sup> | Conf | N-Rule |
|-----------|---|--------------|----------|-----------|--------|---------|--------|------|----------------|------|--------|
| 371.1364  | 1 | C21H20N2NaO3 | 371.1366 | -0.6      | 15.7   | 3       | 100.00 | 12.5 | even           |      | ok     |

**Figure S27. (2E)-3-[3-(2-Methoxyethoxy)-1-phenyl-1H-pyrazol-4-yl]-1-phenylprop-2-en-1-one (4f). HRMS (ESI-TOF).**

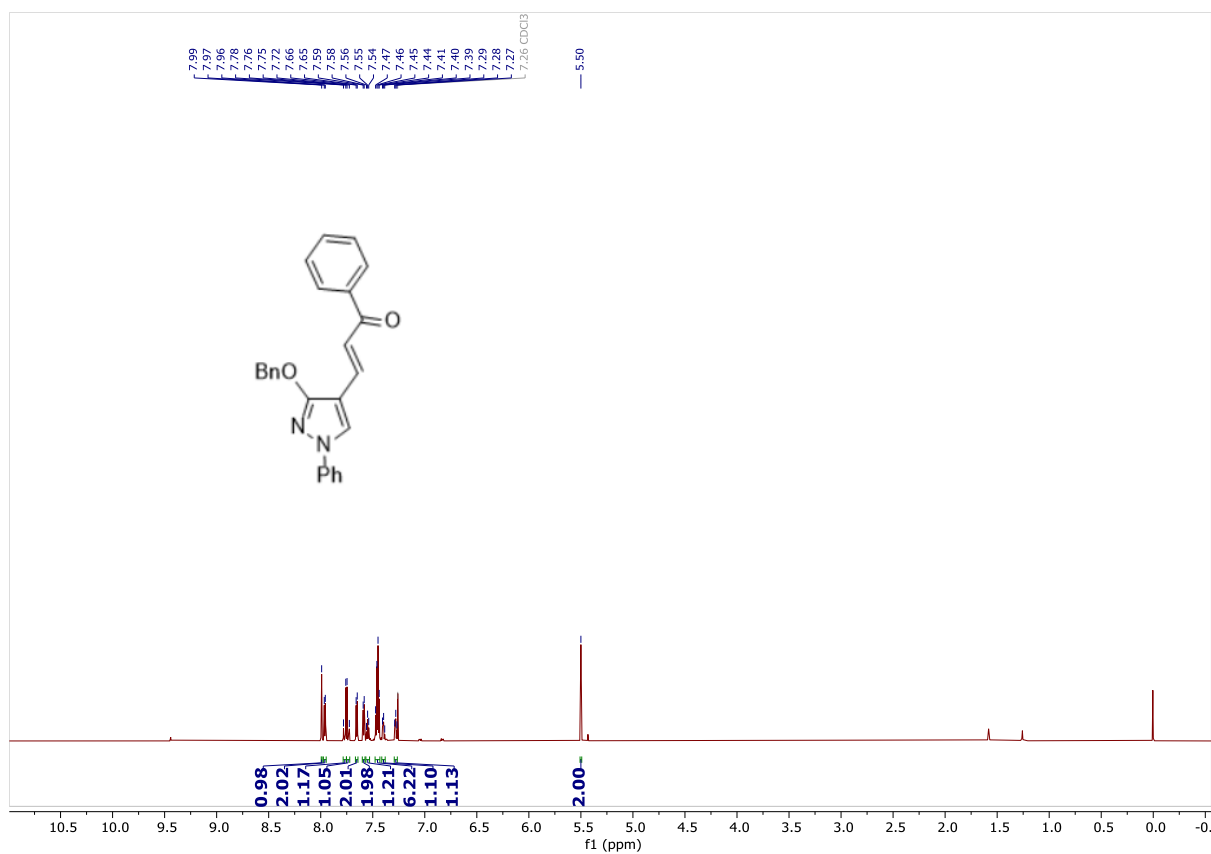

**Figure S28. (2E)-3-[3-(Benzyloxy)-1-phenyl-1H-pyrazol-4-yl]-1-phenylprop-2-en-1-one (4g). <sup>1</sup>H NMR spectrum (700 MHz, CDCl<sub>3</sub>)**

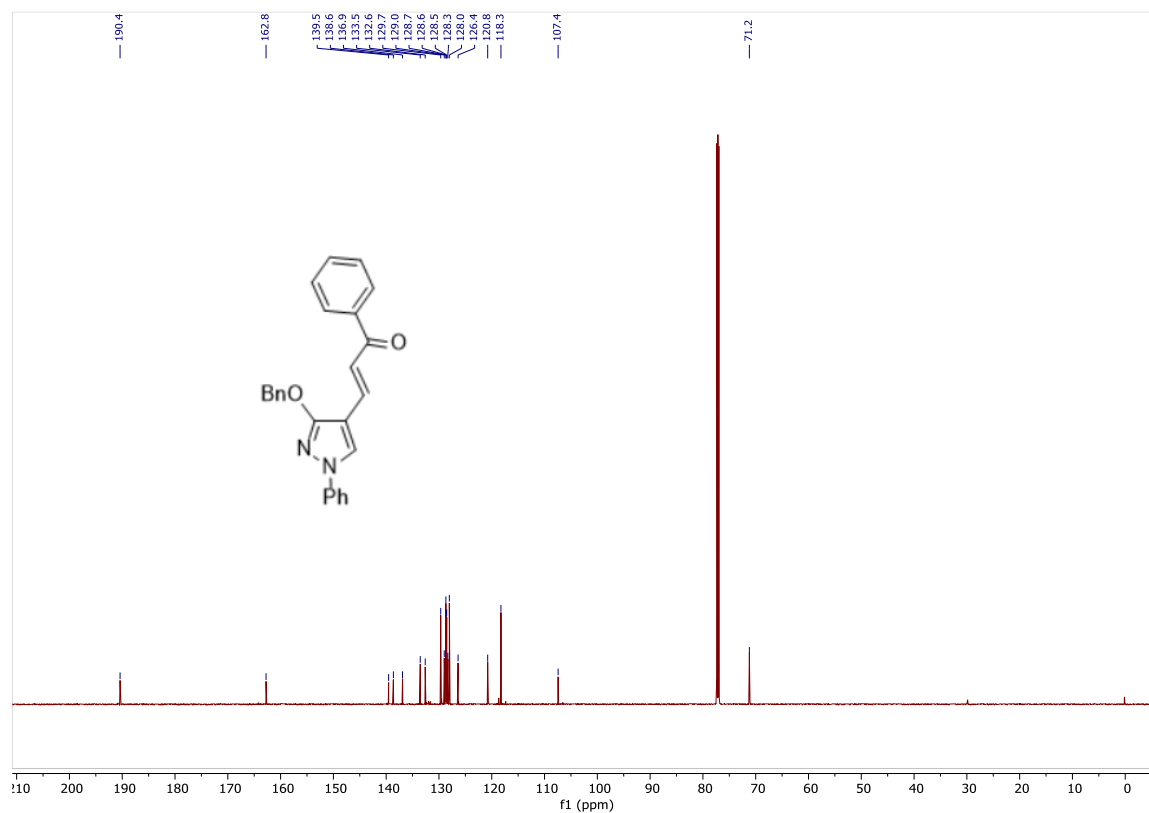

**Figure S29.** (2E)-3-[3-(Benzyloxy)-1-phenyl-1H-pyrazol-4-yl]-1-phenylprop-2-en-1-one (4g). <sup>13</sup>C NMR spectrum (176 MHz, CDCl<sub>3</sub>)

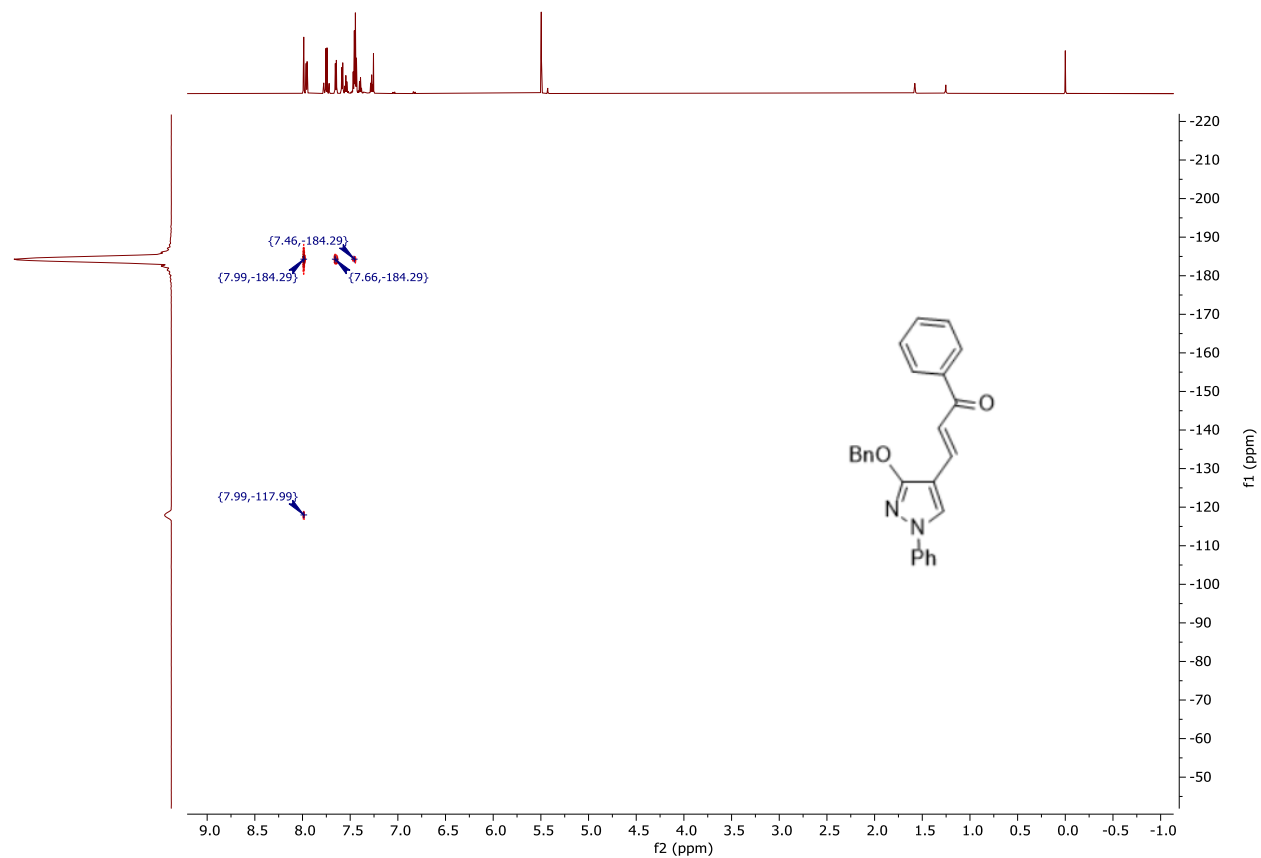

**Figure S30.** (2E)-3-[3-(Benzyloxy)-1-phenyl-1H-pyrazol-4-yl]-1-phenylprop-2-en-1-one (4g). <sup>1</sup>H-<sup>15</sup>N HMBC NMR spectrum (71 MHz, CDCl<sub>3</sub>)

+MS, 4.6min #273

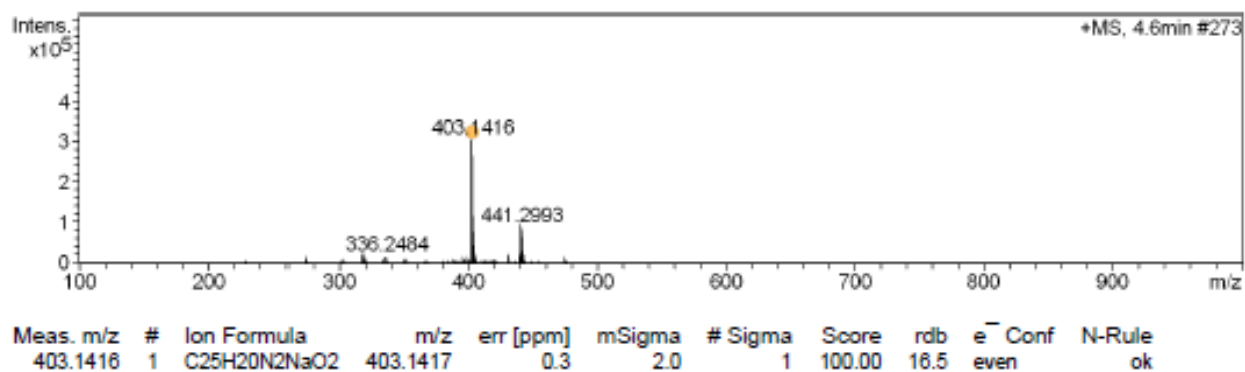

**Figure S31.** (2*E*)-3-[3-(Benzyloxy)-1-phenyl-1*H*-pyrazol-4-yl]-1-phenylprop-2-en-1-one (4g). HRMS (ESI-TOF).

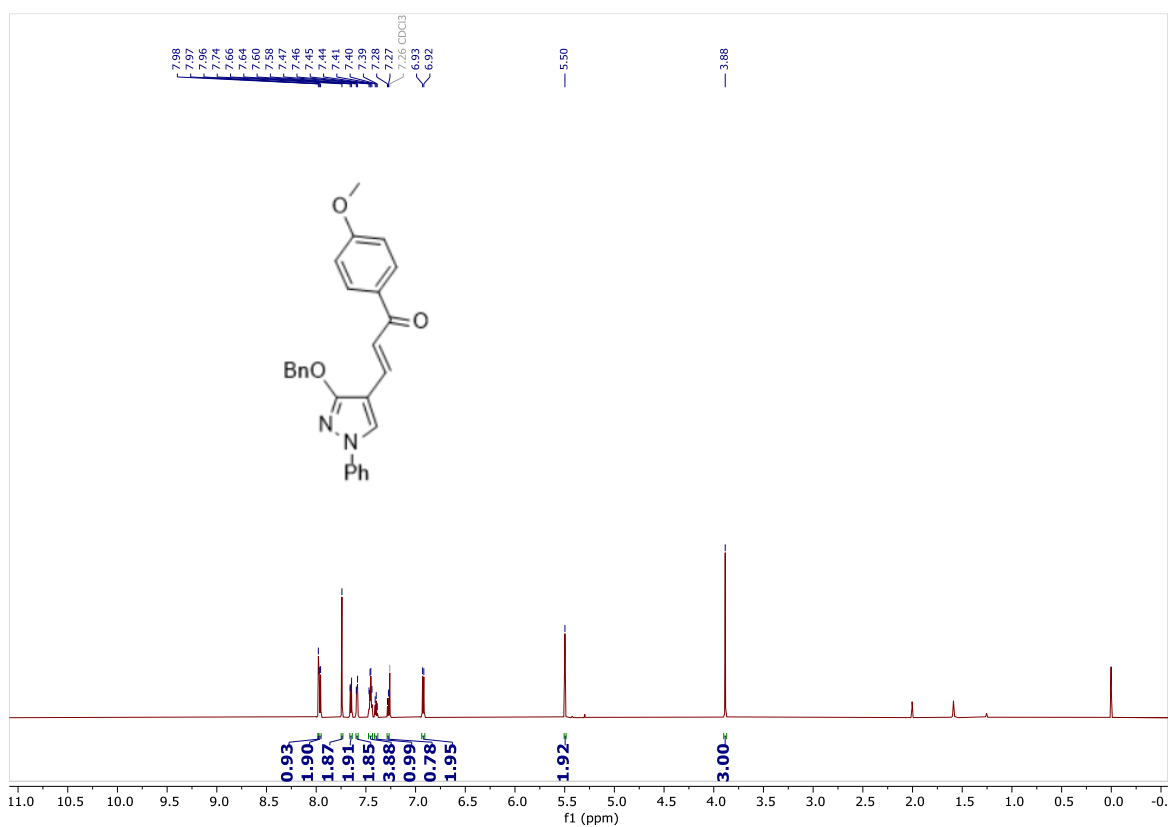

**Figure S32.** (2*E*)-3-[3-(Benzyloxy)-1-phenyl-1*H*-pyrazol-4-yl]-1-(4-methoxyphenyl)prop-2-en-1-one (4h). <sup>1</sup>H NMR spectrum (700 MHz, CDCl<sub>3</sub>)

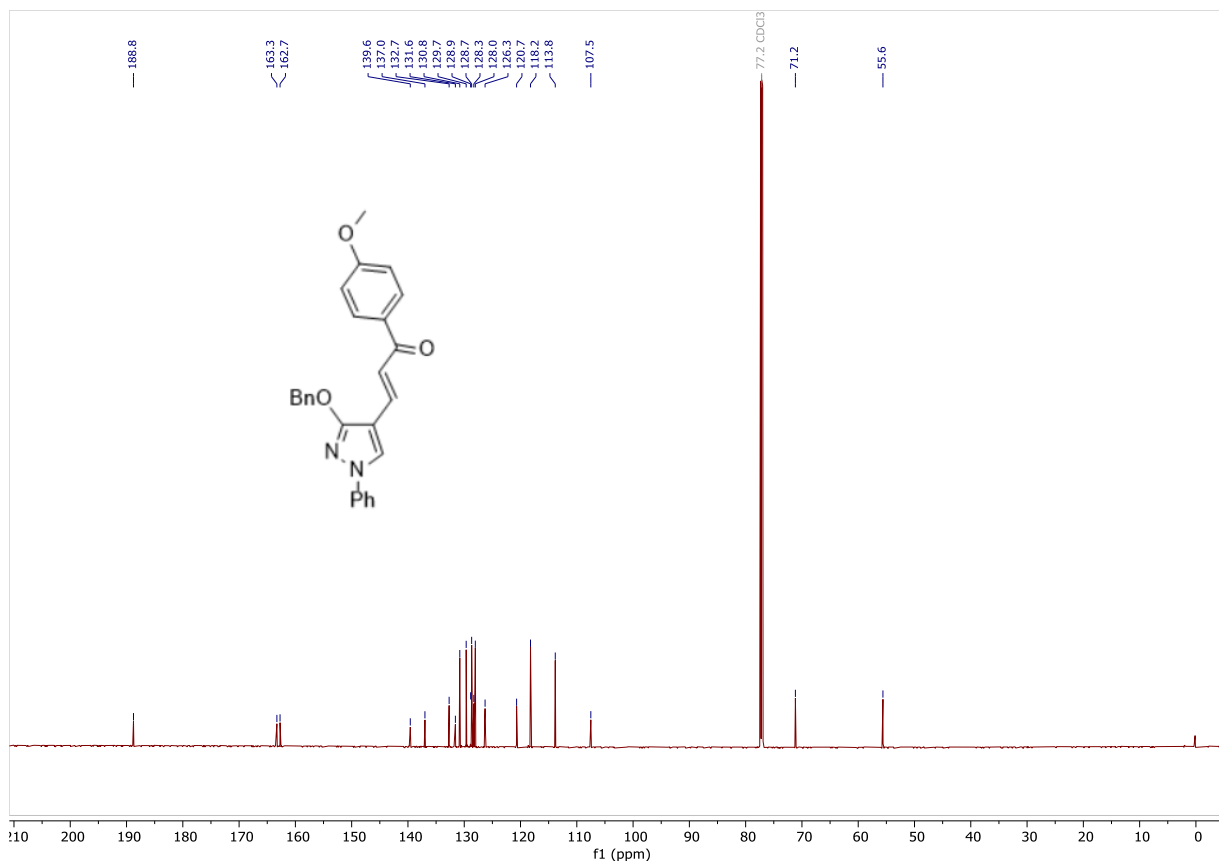

**Figure S33.** (2E)-3-[3-(Benzyloxy)-1-phenyl-1H-pyrazol-4-yl]-1-(4-methoxyphenyl)prop-2-en-1-one (4h). <sup>13</sup>C NMR spectrum (176 MHz, CDCl<sub>3</sub>)

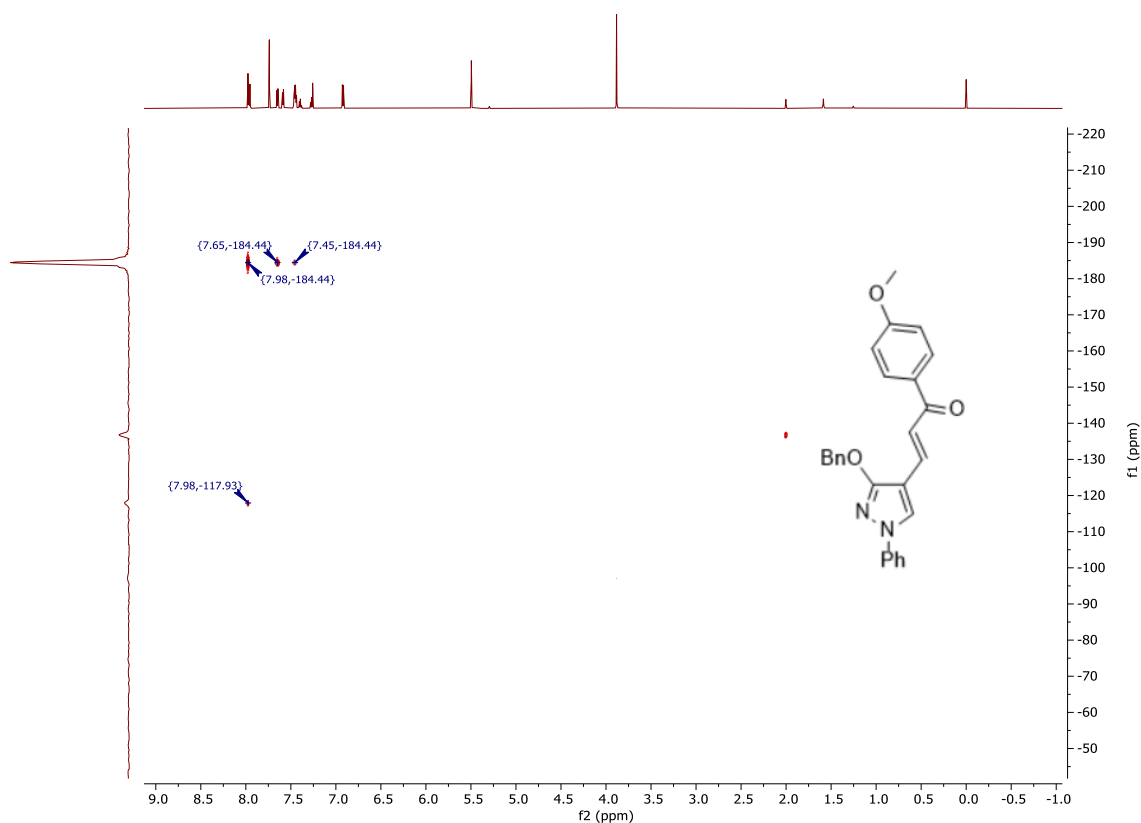

**Figure S34.** (E)-3-[3-(Benzyloxy)-1-phenyl-1H-pyrazol-4-yl]-1-(4-methoxyphenyl)prop-2-en-1-one (4h). <sup>1</sup>H-<sup>15</sup>N HMBC NMR spectrum (71 MHz, CDCl<sub>3</sub>)

+MS, 3.9min #236

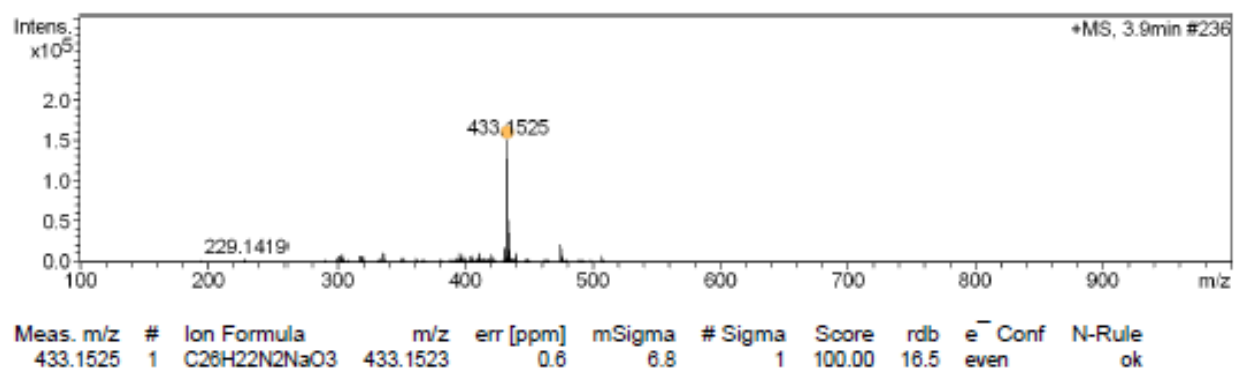

Figure S35. (*E*)-3-[3-(Benzyloxy)-1-phenyl-1*H*-pyrazol-4-yl]-1-(4-methoxyphenyl)prop-2-en-1-one (4h). HRMS (ESI-TOF).

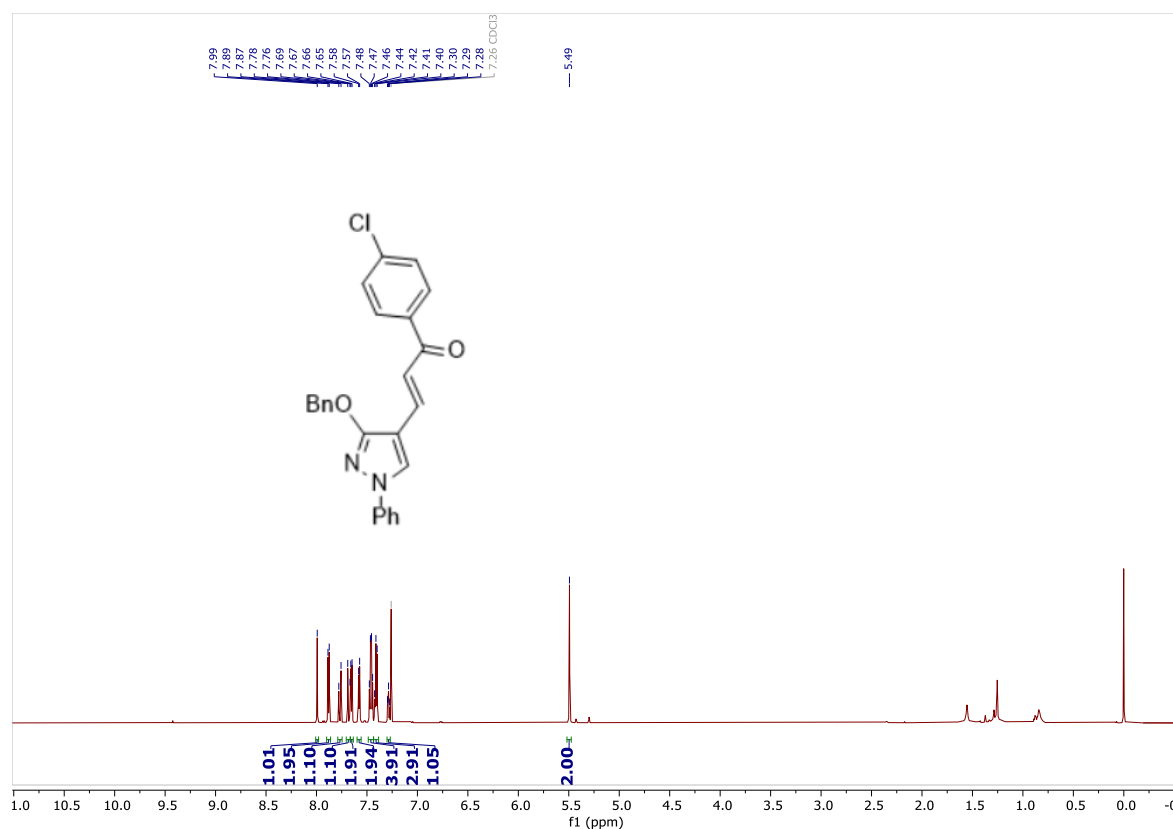

Figure S36. (2*E*)-3-[3-(Benzyloxy)-1-phenyl-1*H*-pyrazol-4-yl]-1-(4-chlorophenyl)prop-2-en-1-one (4i). <sup>1</sup>H NMR spectrum (700 MHz, CDCl<sub>3</sub>)

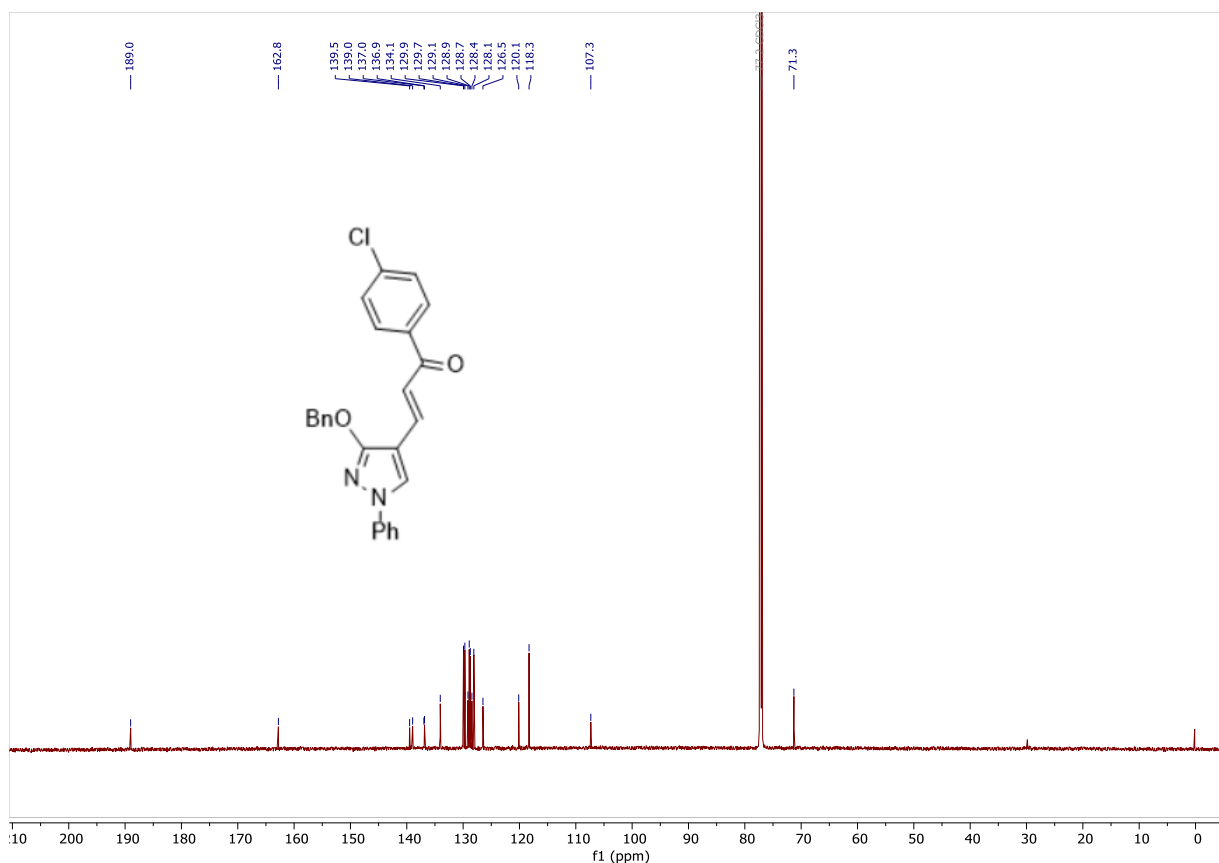

**Figure S37.** (2E)-3-[3-(Benzyloxy)-1-phenyl-1H-pyrazol-4-yl]-1-(4-chlorophenyl)prop-2-en-1-one (4i). <sup>13</sup>C NMR spectrum (176 MHz, CDCl<sub>3</sub>)

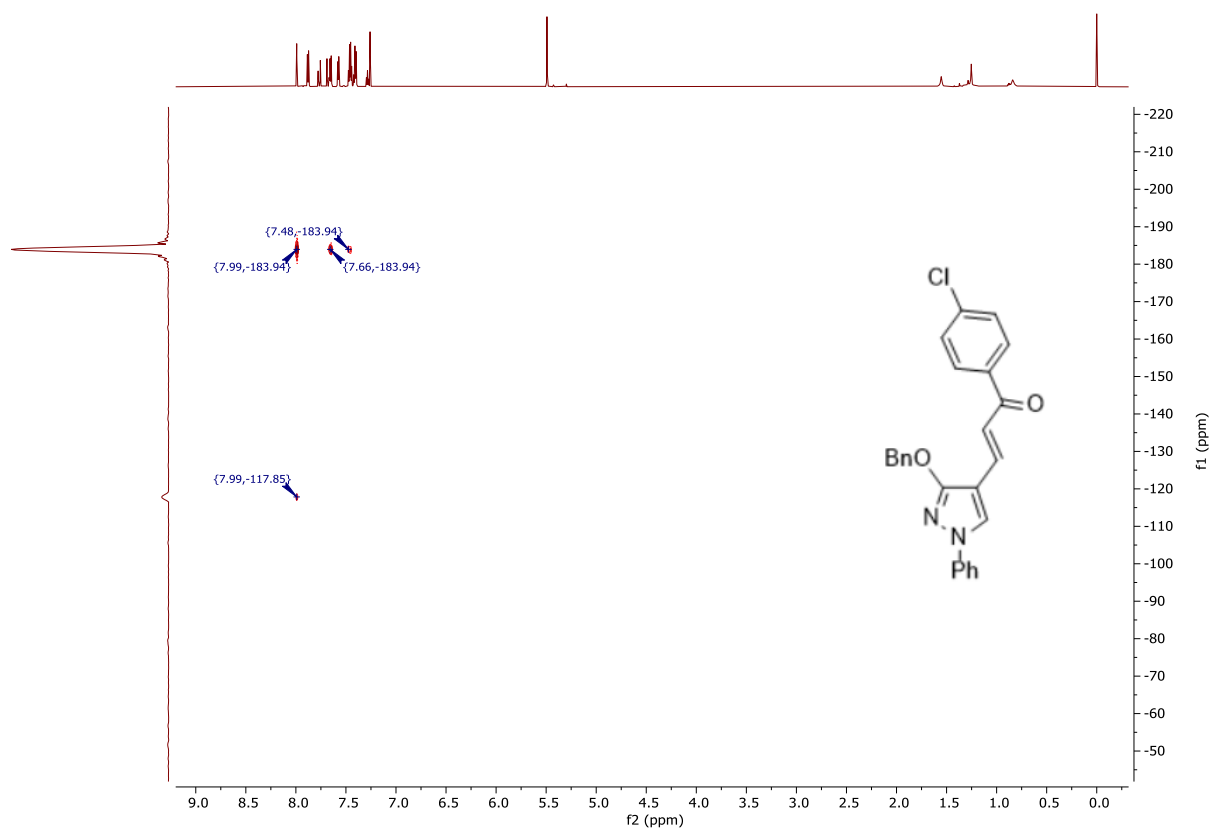

**Figure S38.** (2E)-3-[3-(Benzyloxy)-1-phenyl-1H-pyrazol-4-yl]-1-(4-chlorophenyl)prop-2-en-1-one (4i). <sup>1</sup>H-<sup>15</sup>N HMBC NMR spectrum (71 MHz, CDCl<sub>3</sub>)



+MS, 8.8min #523

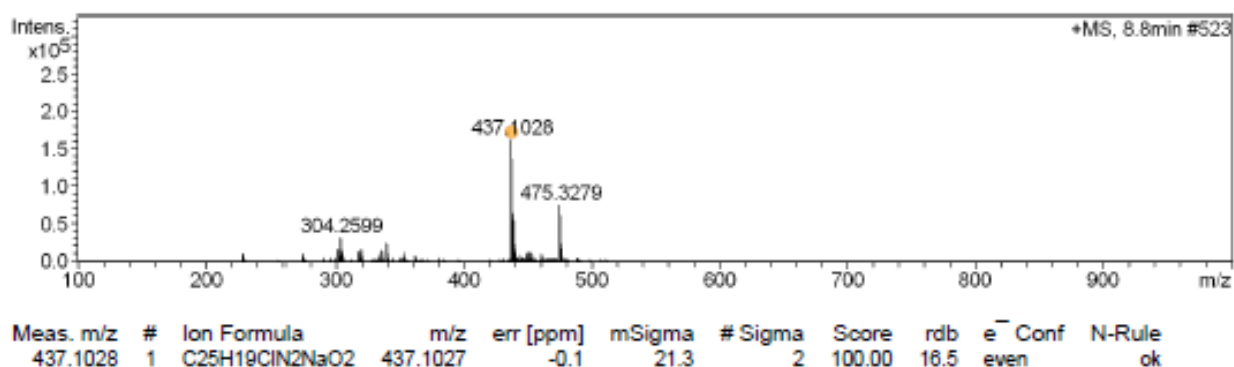

**Figure S39.** (2*E*)-3-[3-(Benzyloxy)-1-phenyl-1*H*-pyrazol-4-yl]-1-(4-chlorophenyl)prop-2-en-1-one (4i). HRMS (ESI-TOF).

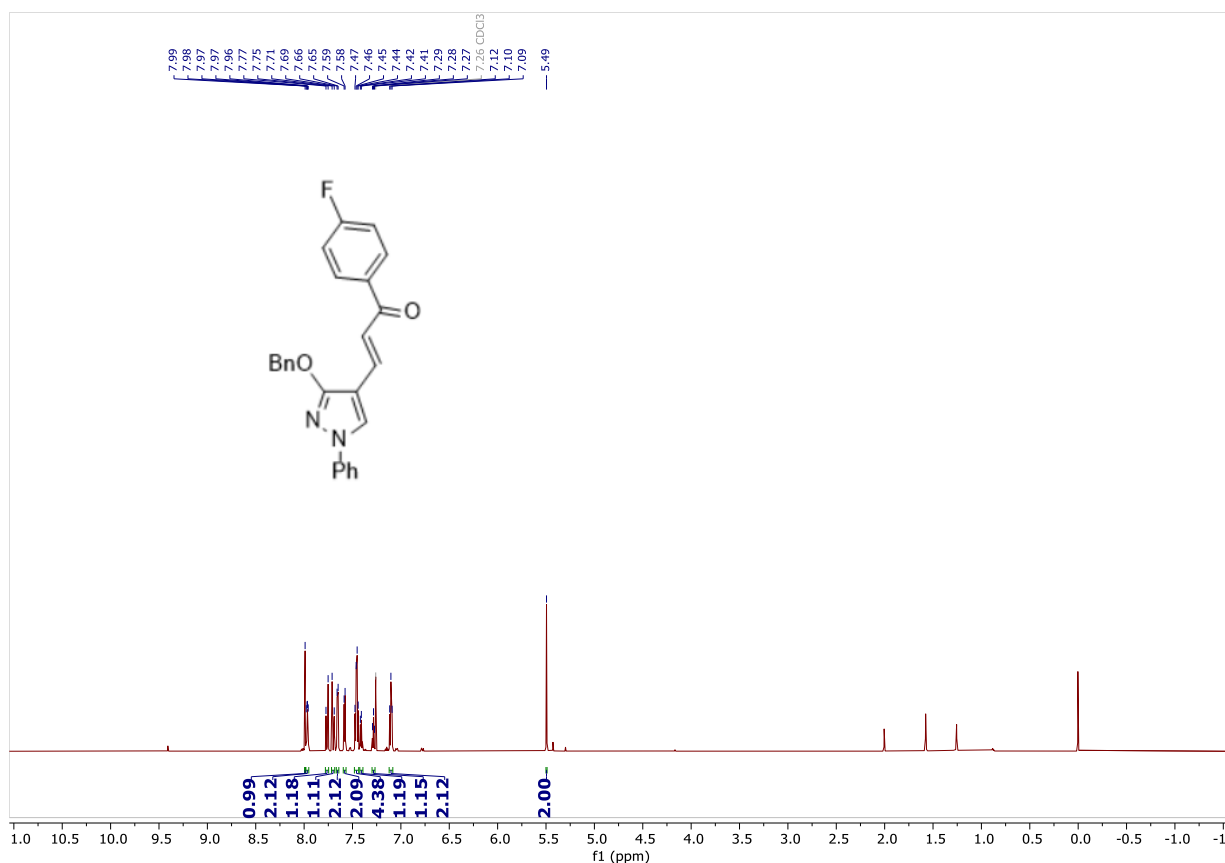

**Figure S40.** (2*E*)-3-[3-(Benzyloxy)-1-phenyl-1*H*-pyrazol-4-yl]-1-(4-fluorophenyl)prop-2-en-1-one (4j). <sup>1</sup>H NMR spectrum (700 MHz, CDCl<sub>3</sub>)

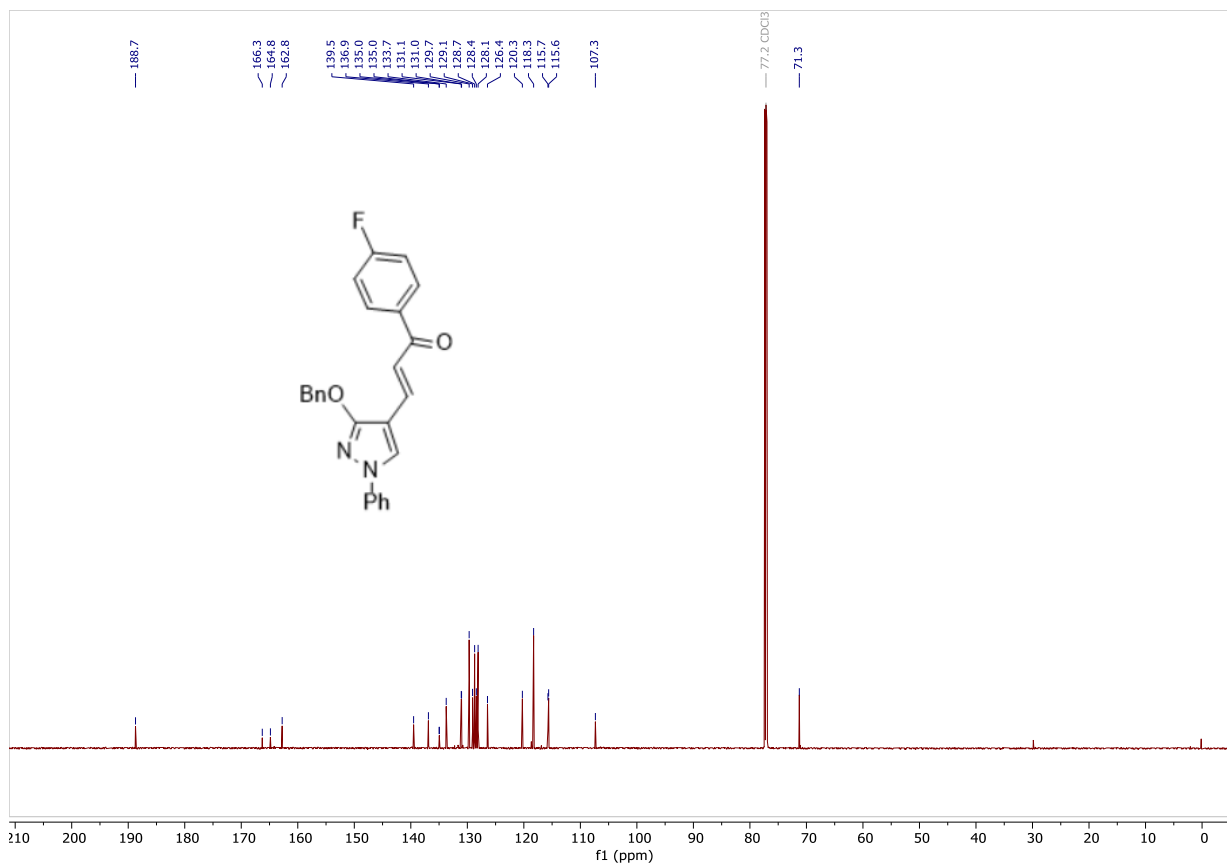

**Figure S41. (2E)-3-[3-(Benzyloxy)-1-phenyl-1H-pyrazol-4-yl]-1-(4-fluorophenyl)prop-2-en-1-one (4j). <sup>13</sup>C NMR spectrum (176 MHz, CDCl<sub>3</sub>)**

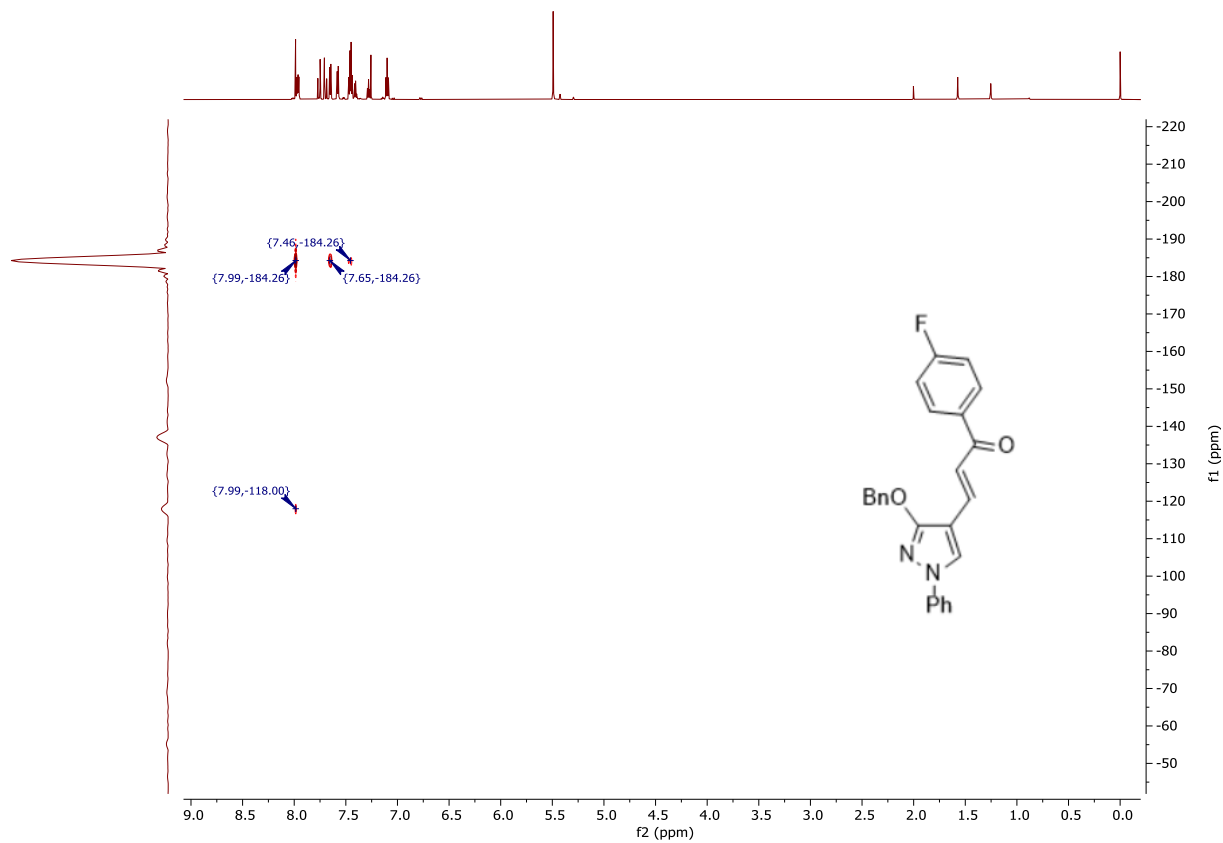

**Figure S42. (2E)-3-[3-(Benzyloxy)-1-phenyl-1H-pyrazol-4-yl]-1-(4-fluorophenyl)prop-2-en-1-one (4j). <sup>1</sup>H-<sup>15</sup>N HMBC NMR spectrum (71 MHz, CDCl<sub>3</sub>)**

+MS, 8.9min #534

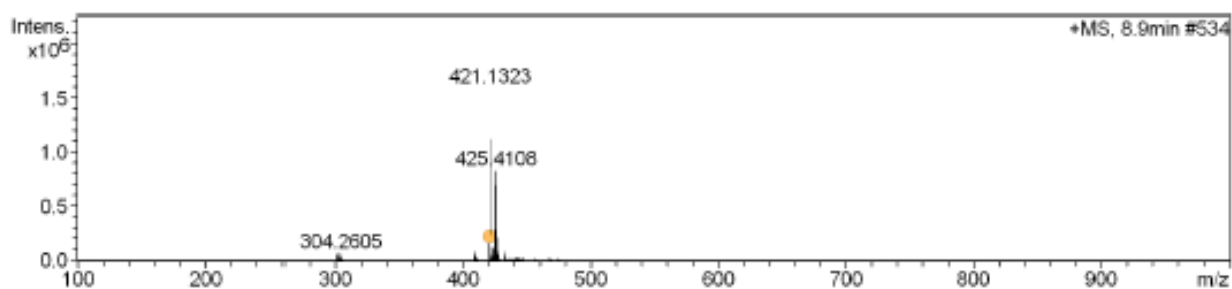

| Meas. m/z | # | Ion Formula                                                      | m/z      | err [ppm] | mSigma | # Sigma | Score  | rdb  | e <sup>-</sup> | Conf | N-Rule |
|-----------|---|------------------------------------------------------------------|----------|-----------|--------|---------|--------|------|----------------|------|--------|
| 421.1323  | 1 | C <sub>25</sub> H <sub>19</sub> FN <sub>2</sub> NaO <sub>2</sub> | 421.1323 | -0.0      | 19.1   | 1       | 100.00 | 16.5 | even           |      | ok     |

Figure S43. (2*E*)-3-[3-(Benzyloxy)-1-phenyl-1*H*-pyrazol-4-yl]-1-(4-fluorophenyl)prop-2-en-1-one (4j). HRMS (ESI-TOF).

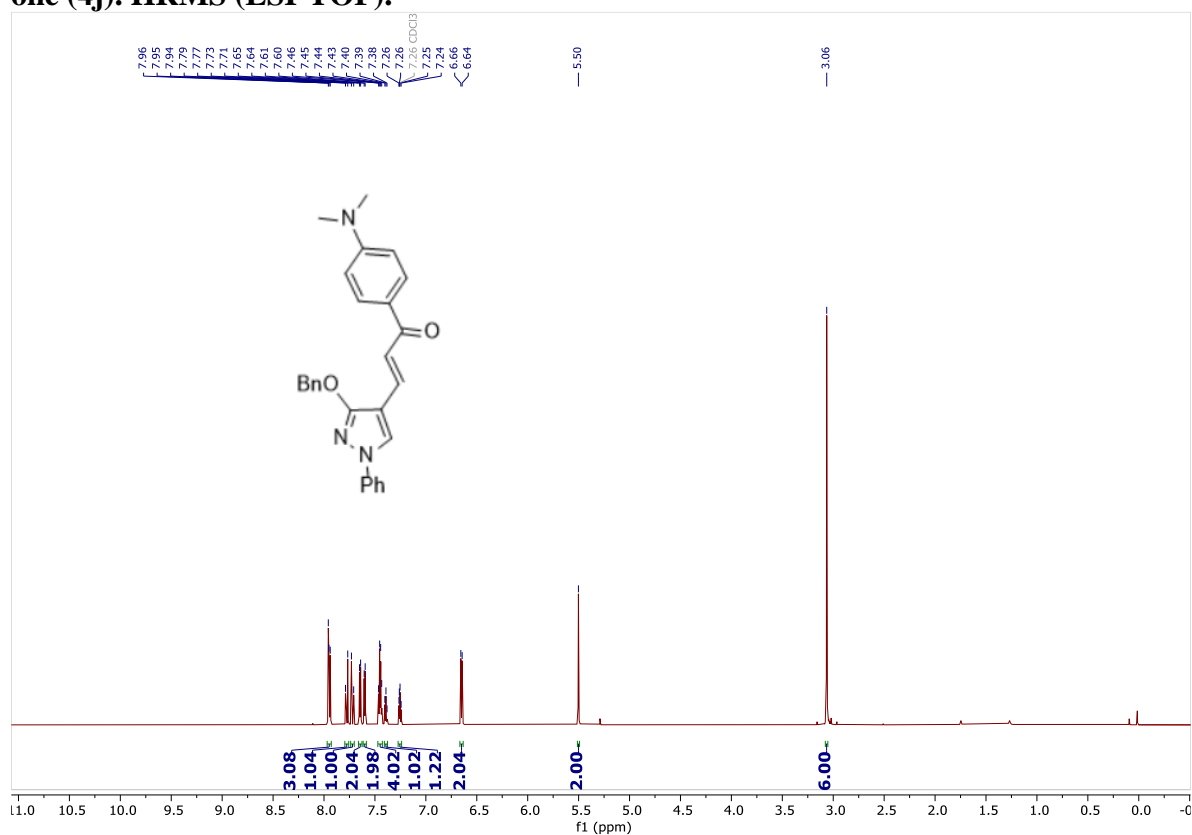

Figure S44. (2*E*)-3-[3-(Benzyloxy)-1-phenyl-1*H*-pyrazol-4-yl]-1-[4-(dimethylamino)phenyl]prop-2-en-1-one (4k). <sup>1</sup>H NMR spectrum (700 MHz, CDCl<sub>3</sub>)

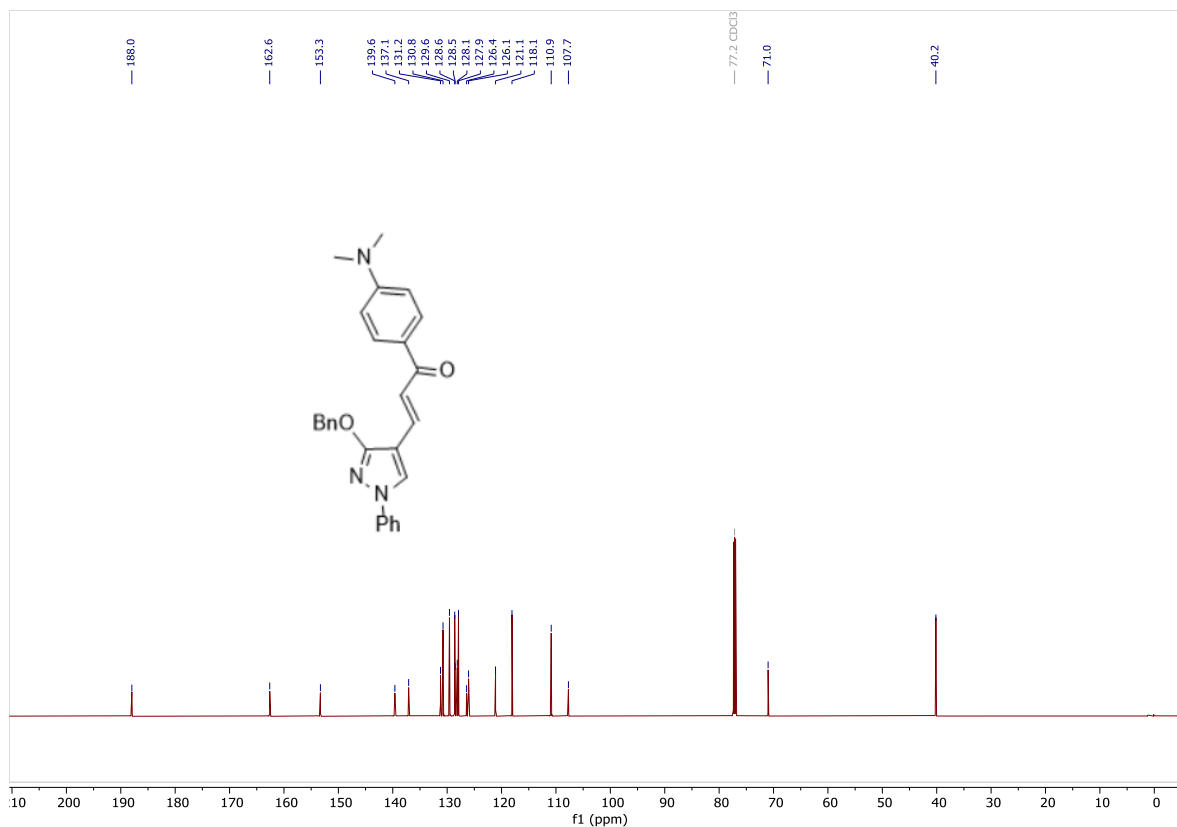

**Figure S45. (2E)-3-[3-(Benzyloxy)-1-phenyl-1H-pyrazol-4-yl]-1-[4-(dimethylamino)phenyl]prop-2-en-1-one (4k).  $^{13}\text{C}$  NMR spectrum (176 MHz, CDCl<sub>3</sub>)**

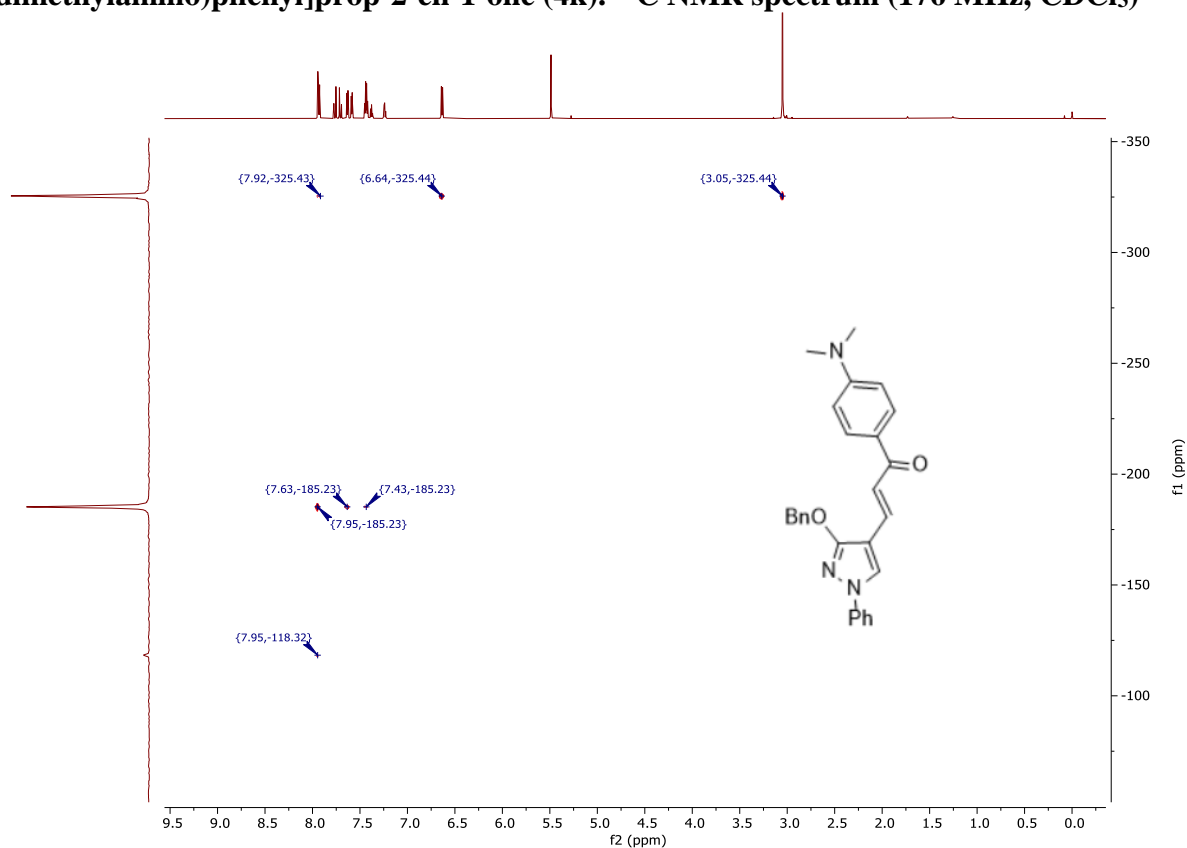

**Figure S46. (2E)-3-[3-(Benzyloxy)-1-phenyl-1H-pyrazol-4-yl]-1-[4-(dimethylamino)phenyl]prop-2-en-1-one (4k).  $^1\text{H}$ - $^{15}\text{N}$  HMBC NMR spectrum (71 MHz, CDCl<sub>3</sub>)**

+MS, 3.1min #186

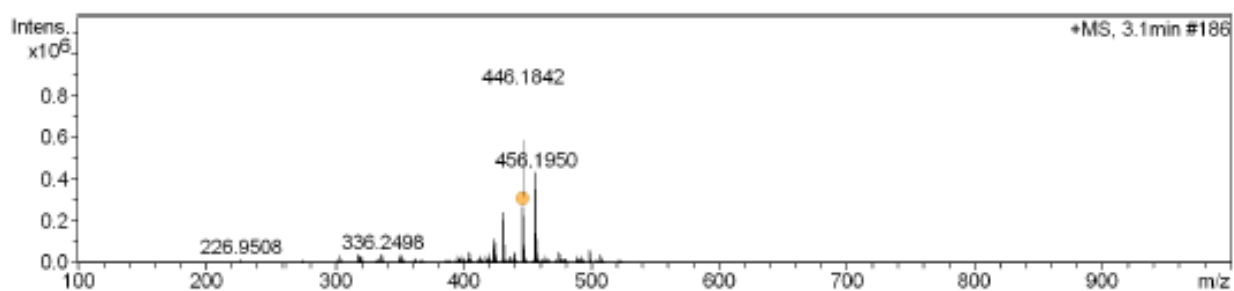

| Meas. m/z | # | Ion Formula                                                     | m/z      | err [ppm] | mSigma | # Sigma | Score  | rdb  | e <sup>-</sup> | Conf | N-Rule |
|-----------|---|-----------------------------------------------------------------|----------|-----------|--------|---------|--------|------|----------------|------|--------|
| 446.1842  | 1 | C <sub>27</sub> H <sub>25</sub> N <sub>3</sub> NaO <sub>2</sub> | 446.1839 | 0.7       | 3.6    | 1       | 100.00 | 16.5 | even           |      | ok     |

Figure S47. (2*E*)-3-[3-(Benzyloxy)-1-phenyl-1*H*-pyrazol-4-yl]-1-[4-(dimethylamino)phenyl]prop-2-en-1-one (4k). HRMS (ESI-TOF).

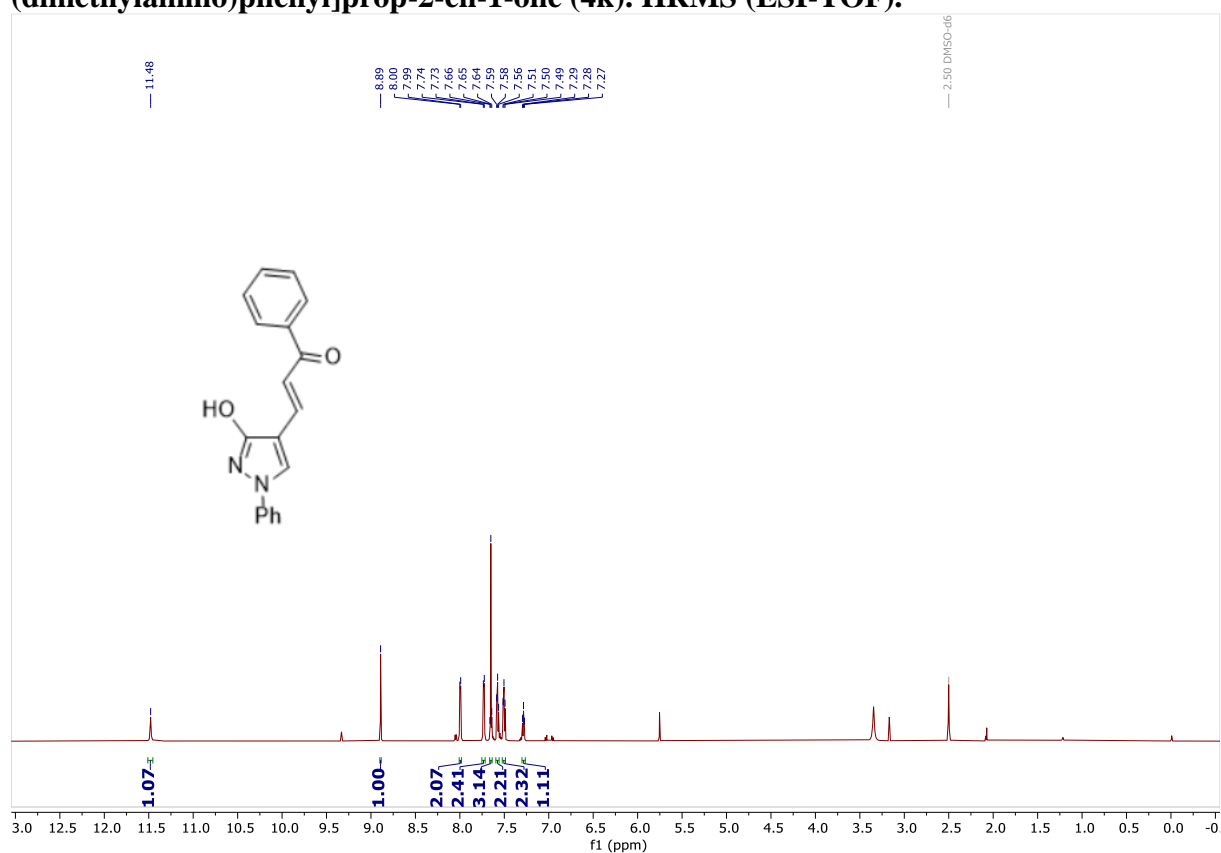

Figure S48. (2*E*)-3-(3-Hydroxy-1-phenyl-1*H*-pyrazol-4-yl)-1-phenylprop-2-en-1-one (5a). <sup>1</sup>H NMR spectrum (700 MHz, DMSO-*d*<sub>6</sub>)

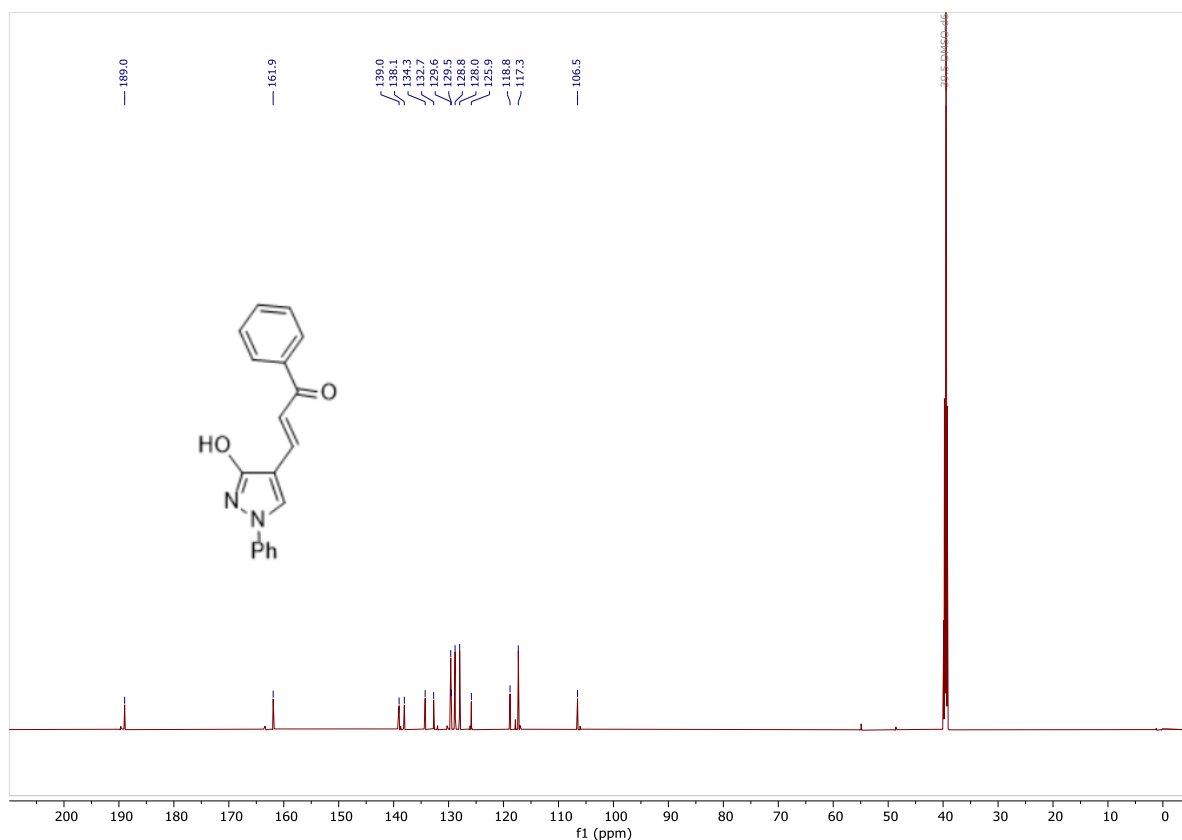

**Figure S49.** (2E)-3-(3-Hydroxy-1-phenyl-1H-pyrazol-4-yl)-1-phenylprop-2-en-1-one (5a). <sup>13</sup>C NMR spectrum (176 MHz, DMSO-*d*<sub>6</sub>)

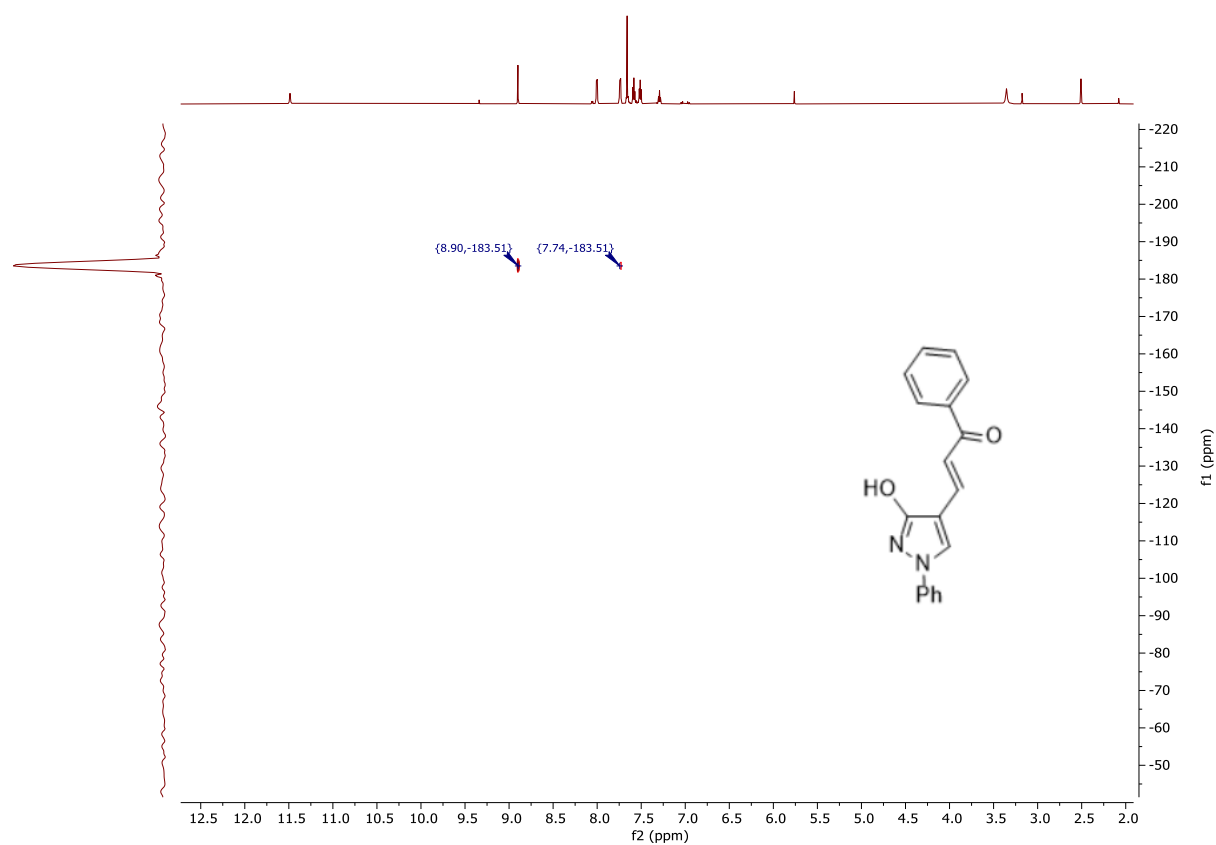

**Figure S50.** (2E)-3-(3-Hydroxy-1-phenyl-1H-pyrazol-4-yl)-1-phenylprop-2-en-1-one (5a). <sup>1</sup>H-<sup>15</sup>N HMBC NMR spectrum (71 MHz, DMSO-*d*<sub>6</sub>)

+MS, 12.6min #754

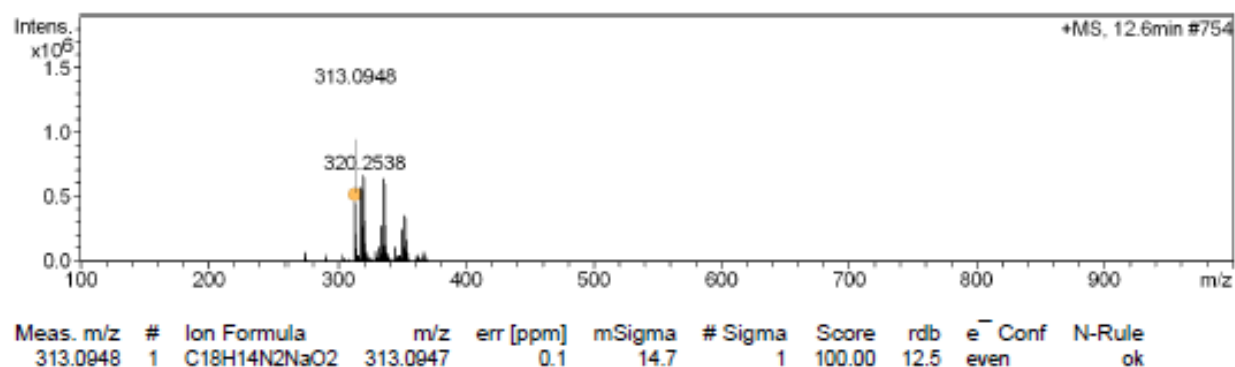

Figure S51. (2*E*)-3-(3-Hydroxy-1-phenyl-1*H*-pyrazol-4-yl)-1-phenylprop-2-en-1-one (5a). HRMS (ESI-TOF).

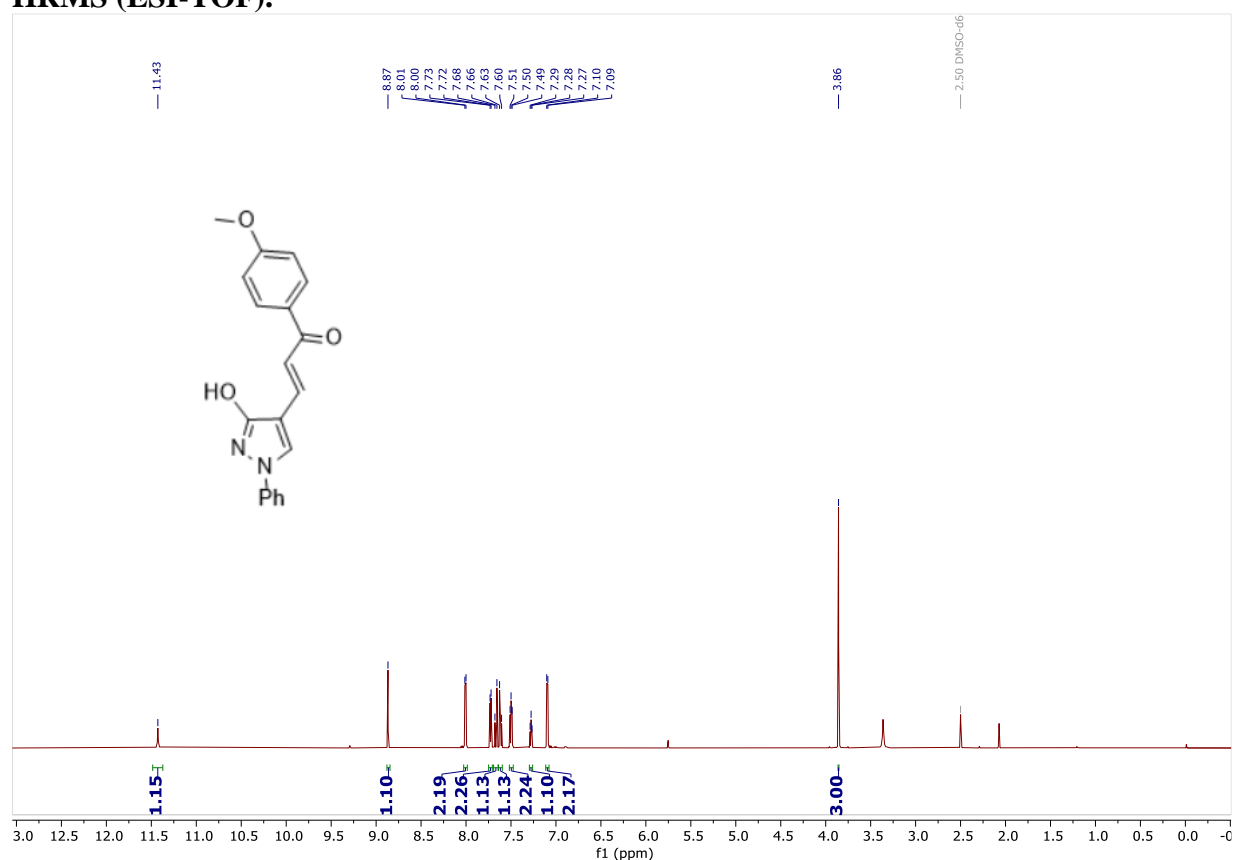

Figure S52. (2*E*)-3-(3-Hydroxy-1-phenyl-1*H*-pyrazol-4-yl)-1-(4-methoxyphenyl)prop-2-en-1-one (5b). <sup>1</sup>H NMR spectrum (700 MHz, DMSO-*d*<sub>6</sub>)

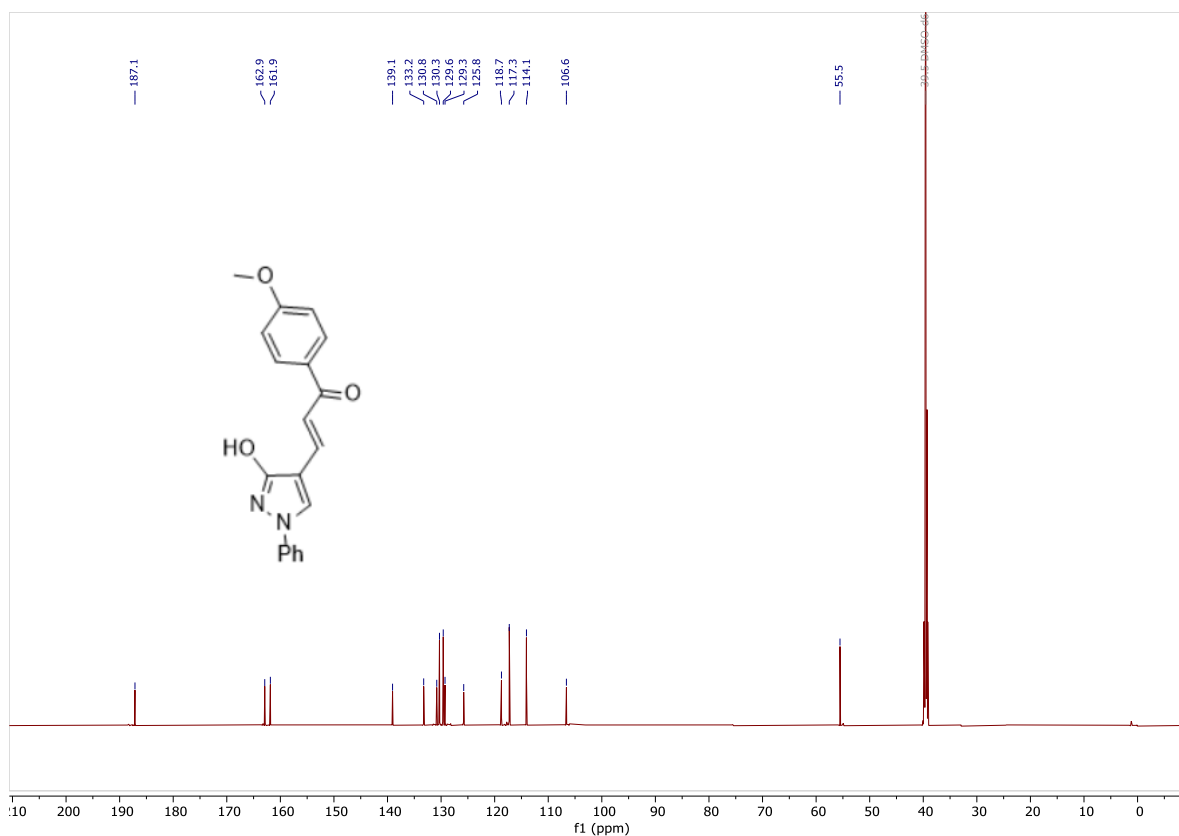

**Figure S53.** (2E)-3-(3-Hydroxy-1-phenyl-1H-pyrazol-4-yl)-1-(4-methoxyphenyl)prop-2-en-1-one (5b). <sup>13</sup>C NMR spectrum (176 MHz, DMSO-*d*<sub>6</sub>)

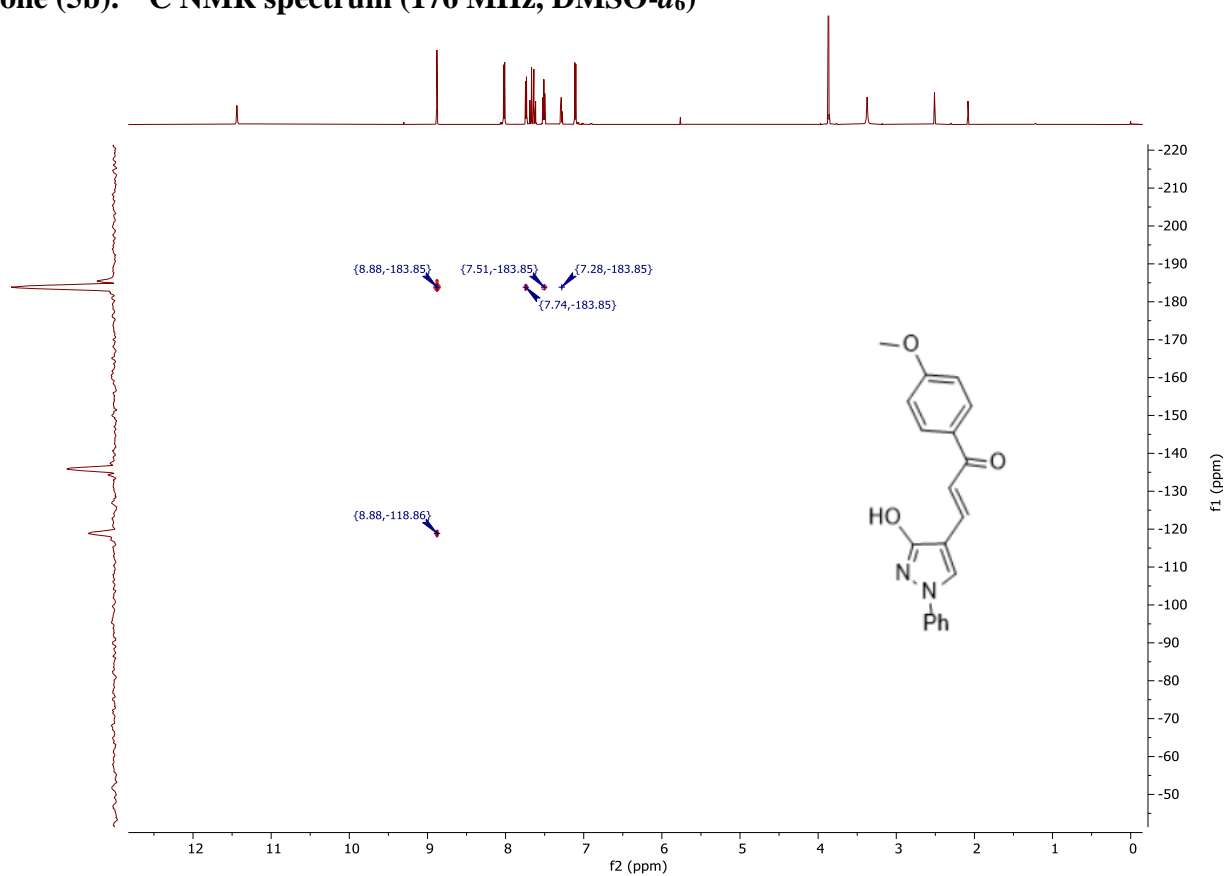

**Figure S54.** (2E)-3-(3-Hydroxy-1-phenyl-1H-pyrazol-4-yl)-1-(4-methoxyphenyl)prop-2-en-1-one (5b). <sup>1</sup>H-<sup>15</sup>N HMBC NMR spectrum (71 MHz, DMSO-*d*<sub>6</sub>)



+MS, 6.6min #394

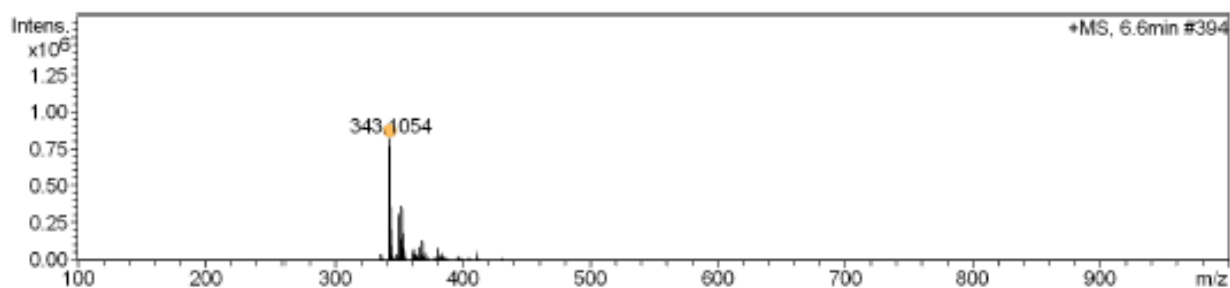

| Meas. m/z | # | Ion Formula                                                     | m/z      | err [ppm] | mSigma | # Sigma | Score  | rdB  | e <sup>-</sup> | Conf | N-Rule |
|-----------|---|-----------------------------------------------------------------|----------|-----------|--------|---------|--------|------|----------------|------|--------|
| 343.1054  | 1 | C <sub>19</sub> H <sub>16</sub> N <sub>2</sub> NaO <sub>3</sub> | 343.1053 | 0.3       | 30.8   | 2       | 100.00 | 12.5 | even           |      | ok     |

Figure S55. (2*E*)-3-(3-Hydroxy-1-phenyl-1*H*-pyrazol-4-yl)-1-(4-methoxyphenyl)prop-2-en-1-one (5b). HRMS (ESI-TOF).

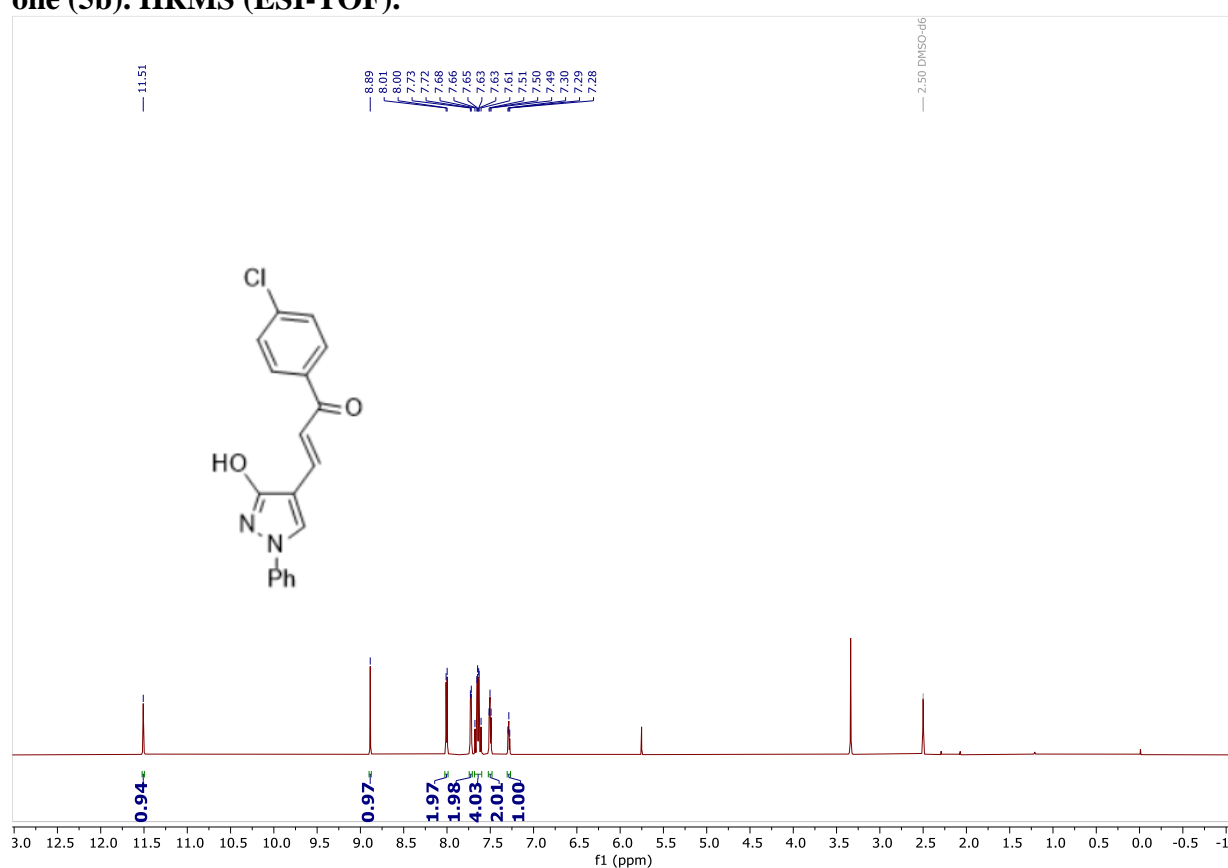

Figure S56. (2*E*)-1-(4-Chlorophenyl)-3-(3-hydroxy-1-phenyl-1*H*-pyrazol-4-yl)prop-2-en-1-one (5c). <sup>1</sup>H NMR spectrum (700 MHz, DMSO-*d*<sub>6</sub>)

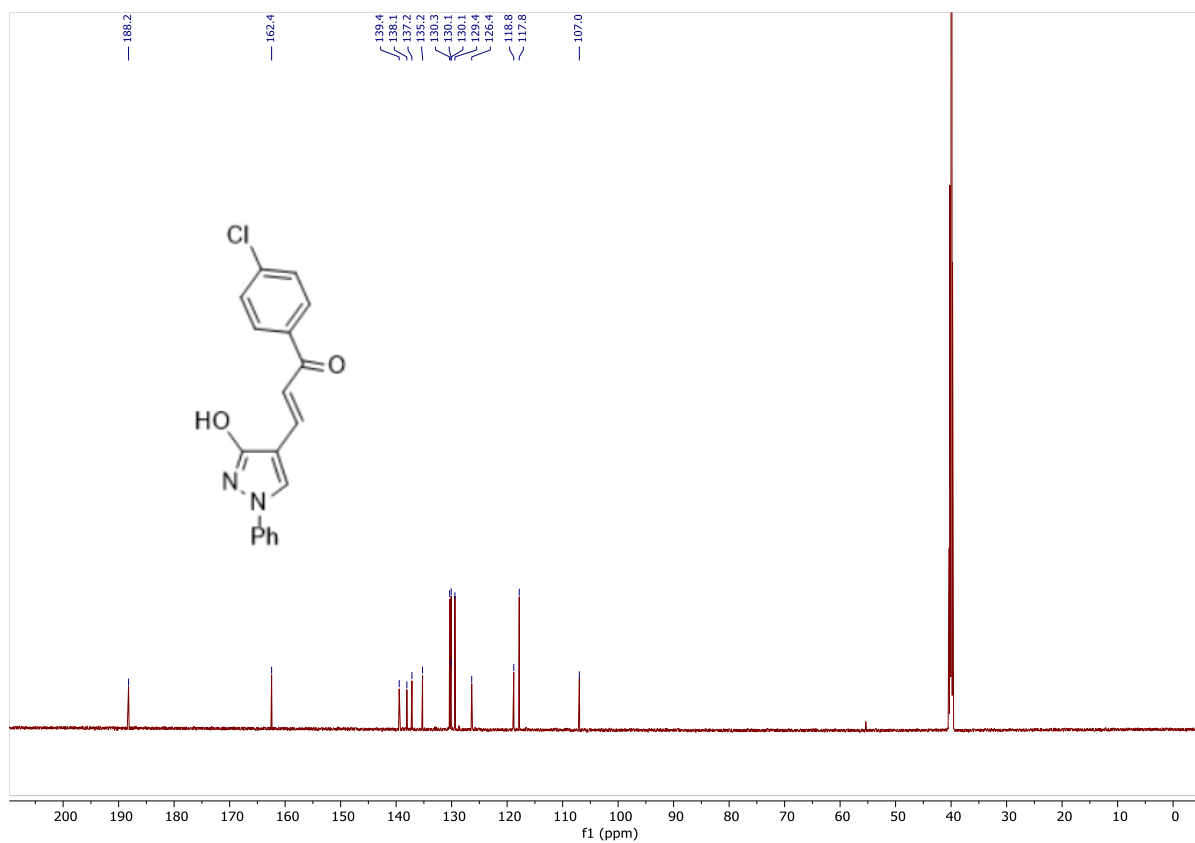

**Figure S57.** (E)-1-(4-Chlorophenyl)-3-(3-hydroxy-1-phenyl-1H-pyrazol-4-yl)prop-2-en-1-one (5c). <sup>13</sup>C NMR spectrum (176 MHz, DMSO-*d*<sub>6</sub>)

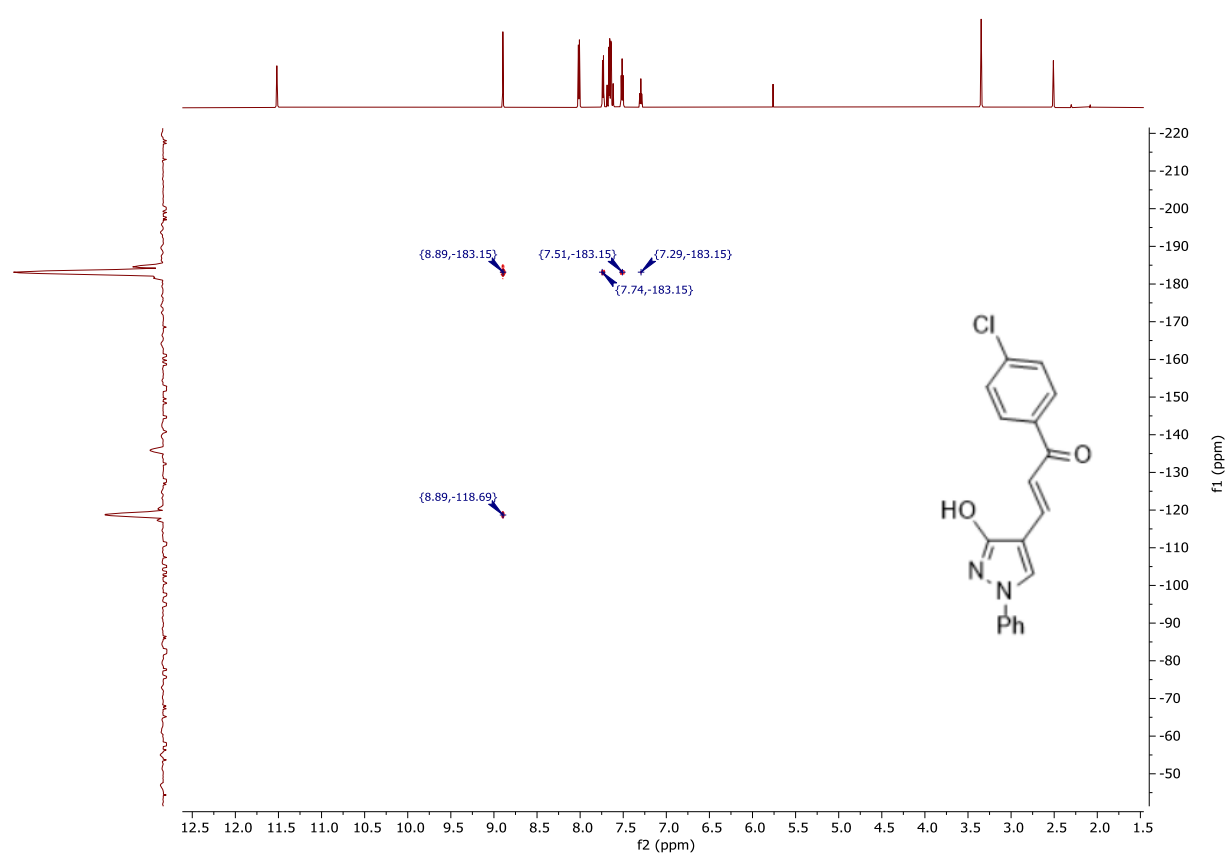

**Figure S58.** (E)-1-(4-Chlorophenyl)-3-(3-hydroxy-1-phenyl-1H-pyrazol-4-yl)prop-2-en-1-one (5c). <sup>1</sup>H-<sup>15</sup>N HMBC NMR spectrum (71 MHz, DMSO-*d*<sub>6</sub>)

+MS, 10.3min #619

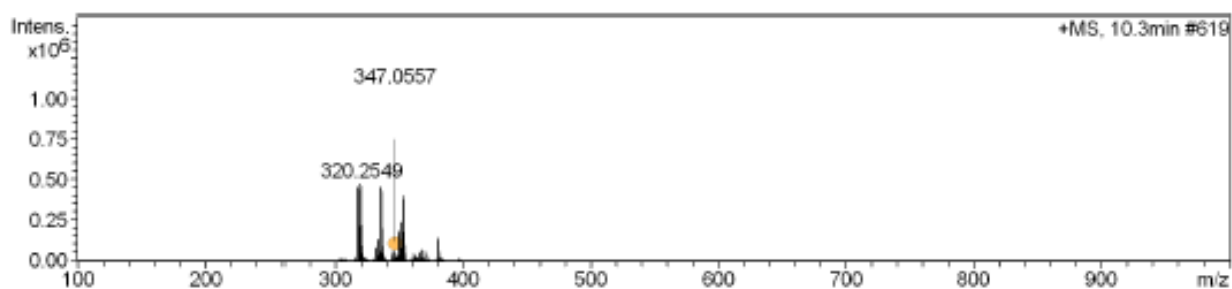

| Meas. m/z | # | Ion Formula    | m/z      | err [ppm] | mSigma | # Sigma | Score  | rdb  | e <sup>-</sup> | Conf | N-Rule |
|-----------|---|----------------|----------|-----------|--------|---------|--------|------|----------------|------|--------|
| 347.0557  | 1 | C18H13ClN2NaO2 | 347.0558 | 0.1       | 26.6   | 1       | 100.00 | 12.5 | even           |      | ok     |

Figure S59. (2*E*)-1-(4-Chlorophenyl)-3-(3-hydroxy-1-phenyl-1*H*-pyrazol-4-yl)prop-2-en-1-one (5c). HRMS (ESI-TOF).

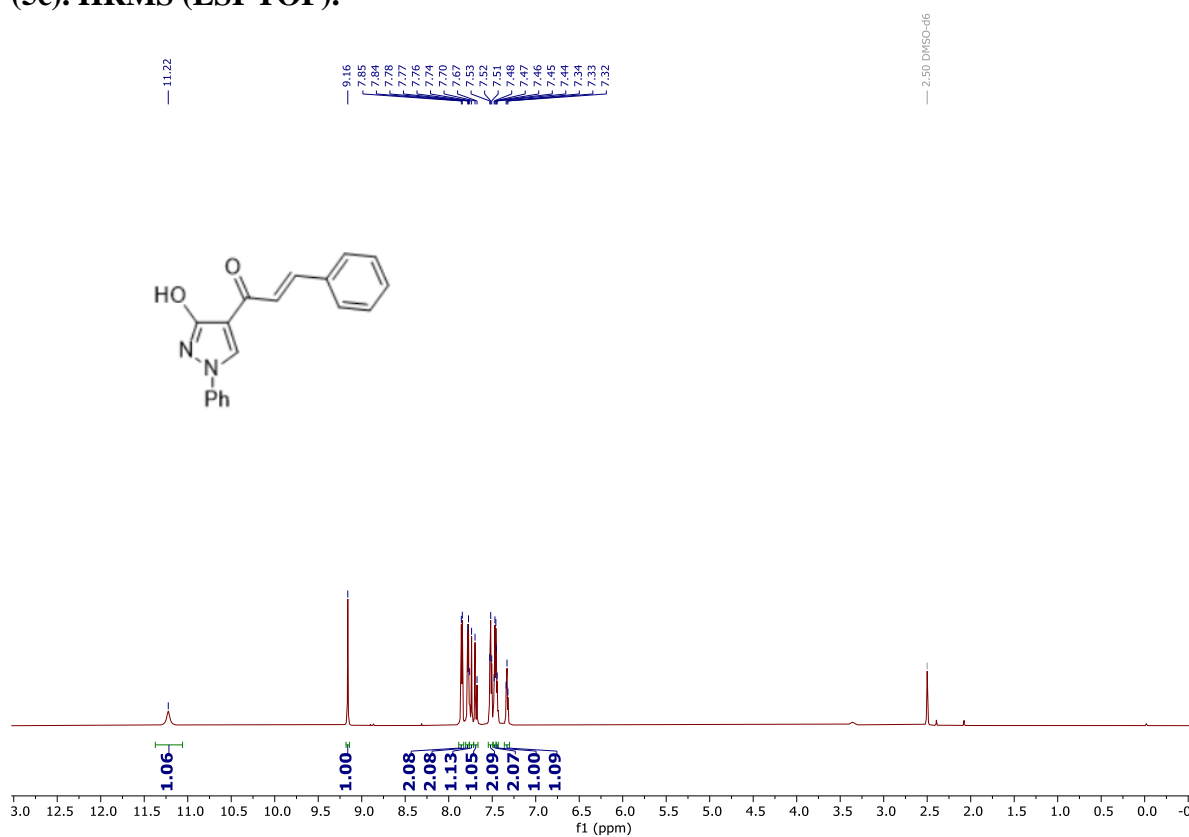

Figure S60. (2*E*)-1-(3-Hydroxy-1-phenyl-1*H*-pyrazol-4-yl)-3-phenylprop-2-en-1-one (8a) <sup>1</sup>H NMR spectrum (700 MHz, DMSO-*d*<sub>6</sub>)

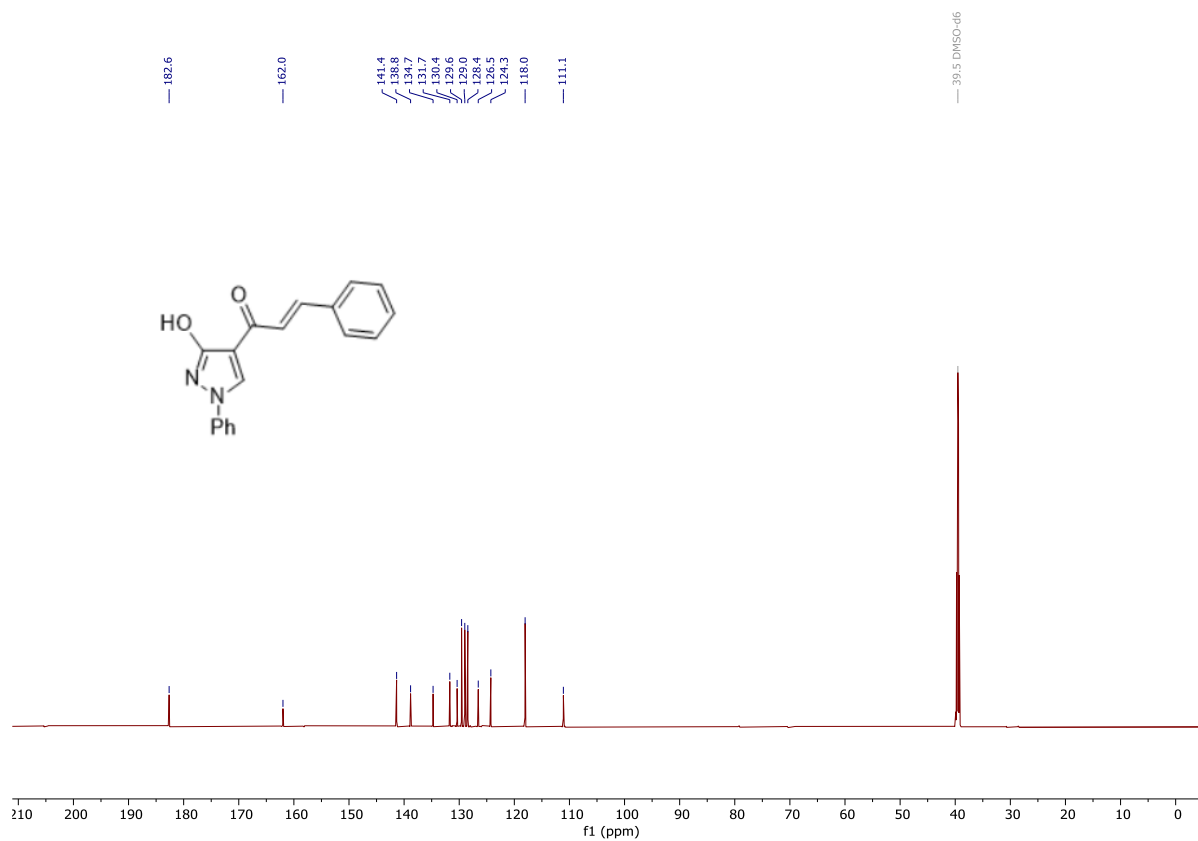

**Figure S61.** (2E)-1-(3-Hydroxy-1-phenyl-1H-pyrazol-4-yl)-3-phenylprop-2-en-1-one (8a). <sup>13</sup>C NMR spectrum (176 MHz, DMSO-*d*<sub>6</sub>)

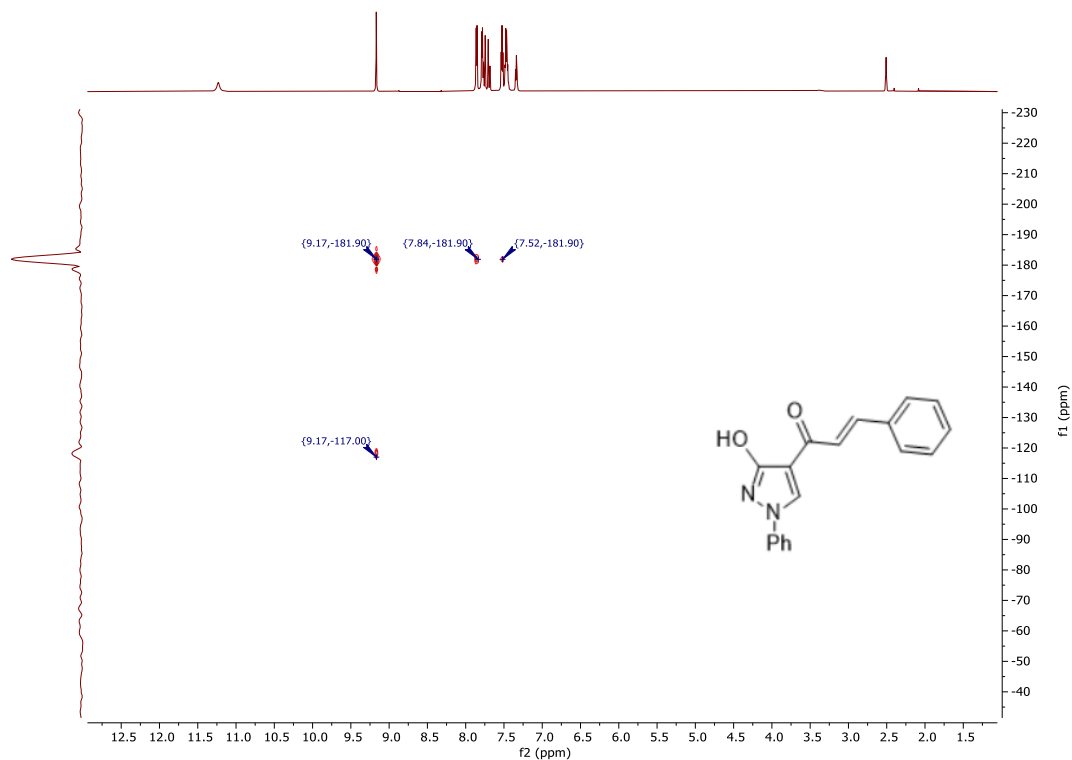

**Figure S62.** (2E)-1-(3-Hydroxy-1-phenyl-1H-pyrazol-4-yl)-3-phenylprop-2-en-1-one (8a). <sup>1</sup>H-<sup>15</sup>N HMBC NMR spectrum (71 MHz, DMSO-*d*<sub>6</sub>)

+MS, 8.2min #492

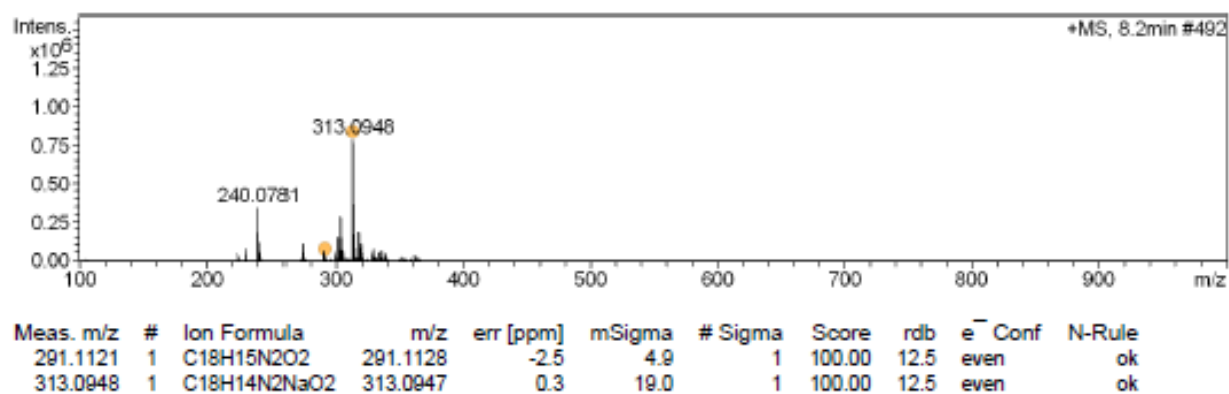

Figure S63. (2*E*)-1-(3-Hydroxy-1-phenyl-1*H*-pyrazol-4-yl)-3-phenylprop-2-en-1-one (8a). HRMS (ESI-TOF).

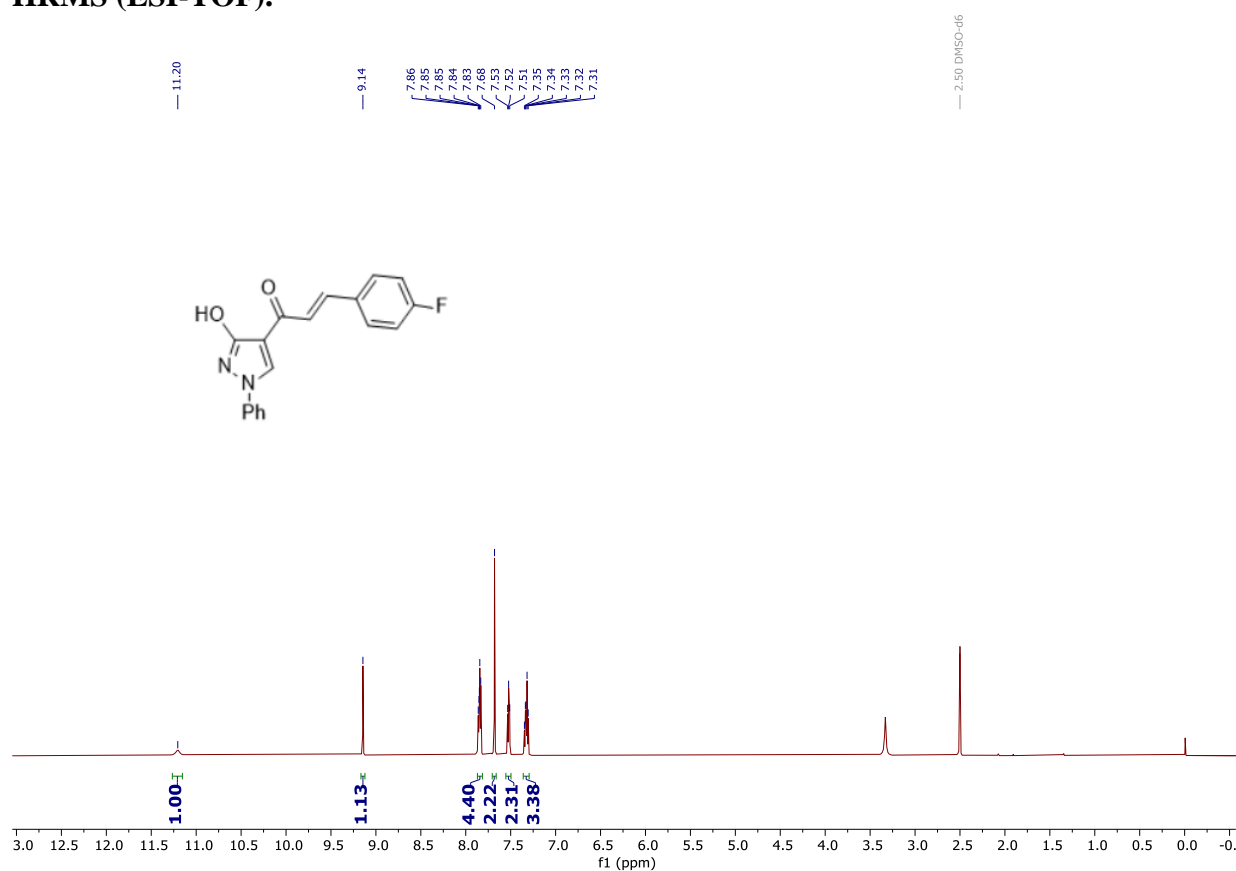

Figure S64. (2*E*)-3-(4-Fluorophenyl)-1-(3-hydroxy-1-phenyl-1*H*-pyrazol-4-yl)prop-2-en-1-one (8b). <sup>1</sup>H NMR spectrum (700 MHz, DMSO-*d*<sub>6</sub>)

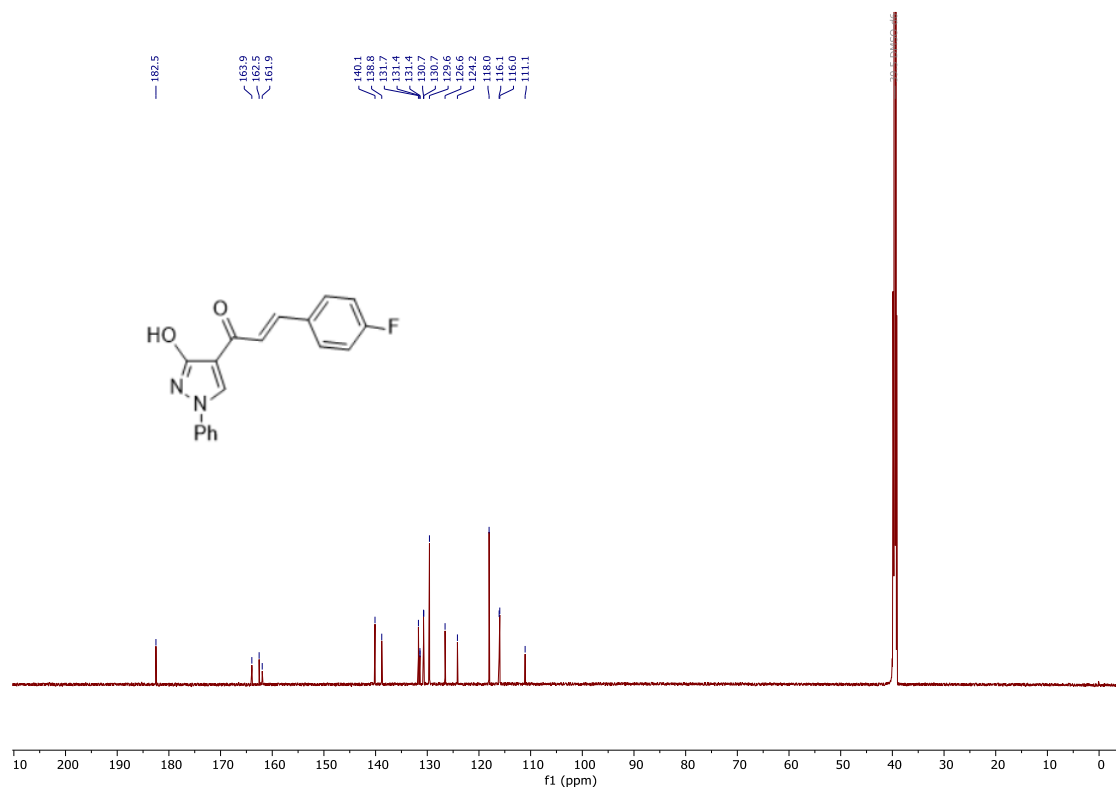

**Figure S65.** (2*E*)-3-(4-Fluorophenyl)-1-(3-hydroxy-1-phenyl-1*H*-pyrazol-4-yl)prop-2-en-1-one (8b). <sup>13</sup>C NMR spectrum (176 MHz, DMSO-*d*<sub>6</sub>)

**+MS, 11.2min #674**

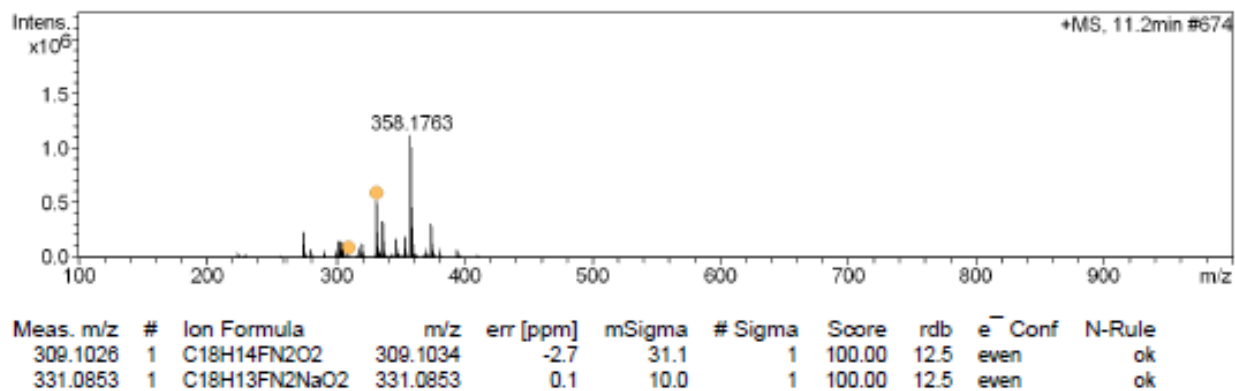

**Figure S66.** (2*E*)-3-(4-Fluorophenyl)-1-(3-hydroxy-1-phenyl-1*H*-pyrazol-4-yl)prop-2-en-1-one (8b). HRMS (ESI-TOF).

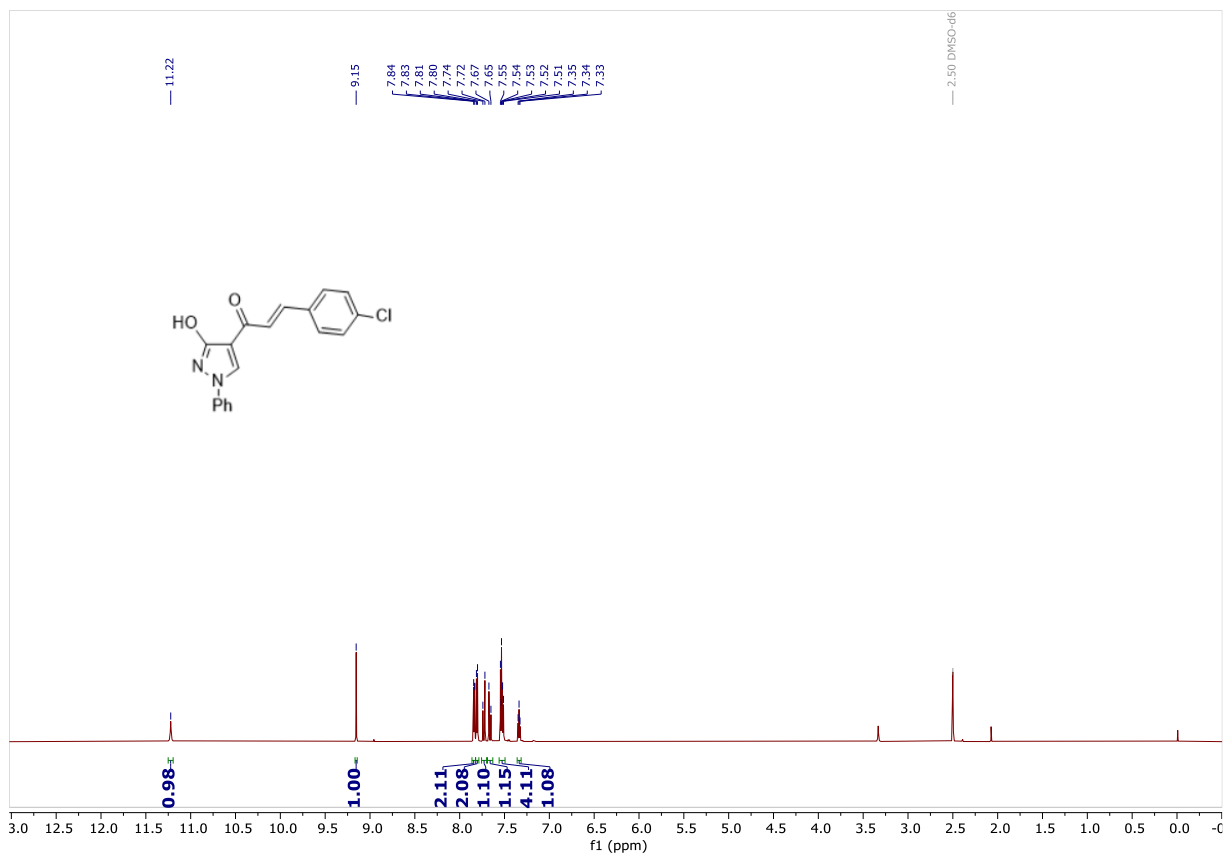

**Figure S67.** (2*E*)-3-(4-Chlorophenyl)-1-(3-hydroxy-1-phenyl-1*H*-pyrazol-4-yl)prop-2-en-1-one (8c). <sup>1</sup>H NMR spectrum (700 MHz, DMSO-*d*<sub>6</sub>)

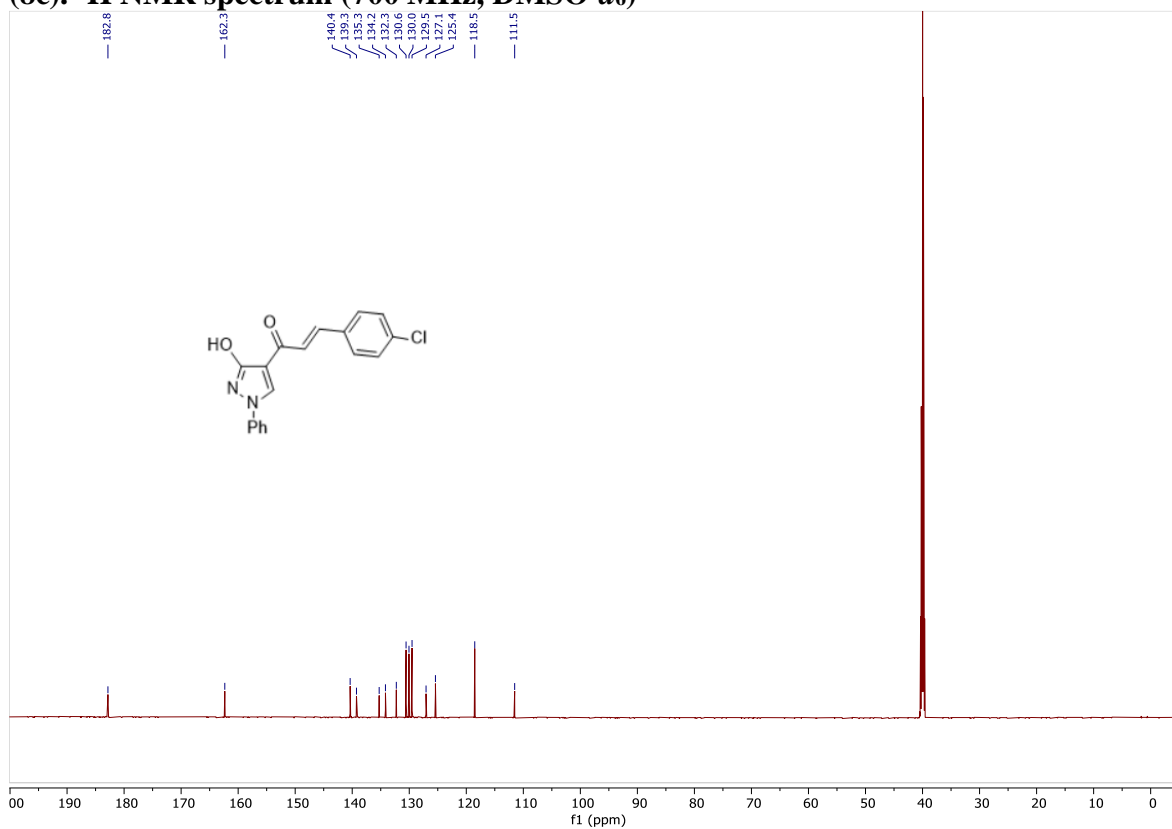

**Figure S68.** (2*E*)-3-(4-Chlorophenyl)-1-(3-hydroxy-1-phenyl-1*H*-pyrazol-4-yl)prop-2-en-1-one (8c). <sup>13</sup>C NMR spectrum (176 MHz, DMSO-*d*<sub>6</sub>)

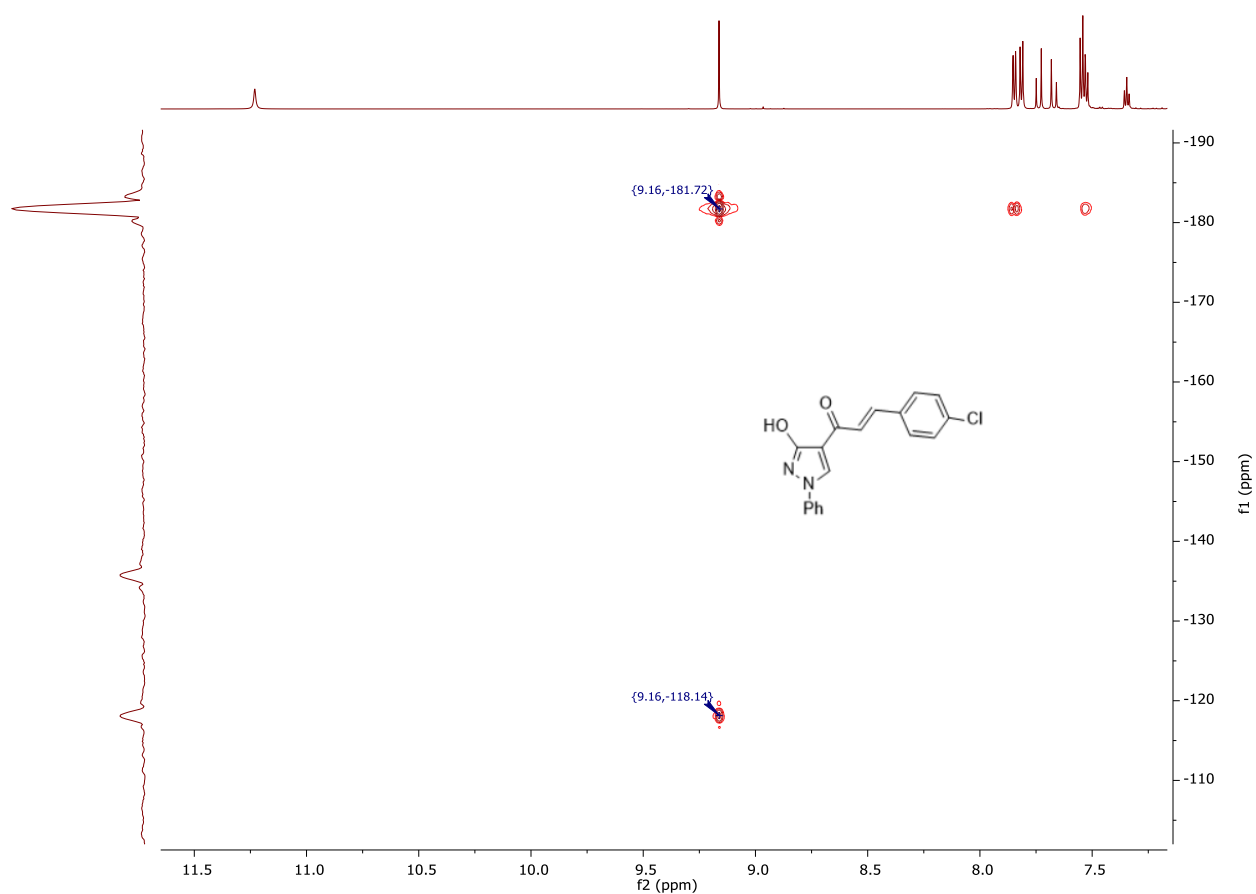

**Figure S69.** (E)-3-(4-Chlorophenyl)-1-(3-hydroxy-1-phenyl-1H-pyrazol-4-yl)prop-2-en-1-one (8c).  $^1\text{H}$ - $^{15}\text{N}$  HMBC NMR spectrum (71 MHz,  $\text{DMSO}-d_6$ )

**+MS, 4.6min #275**

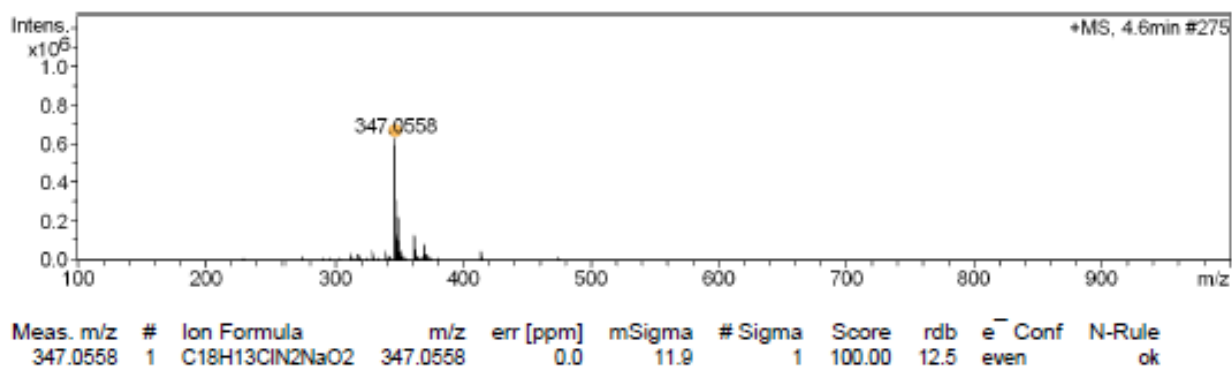

**Figure S70.** (E)-3-(4-Chlorophenyl)-1-(3-hydroxy-1-phenyl-1H-pyrazol-4-yl)prop-2-en-1-one (8c). HRMS (ESI-TOF).



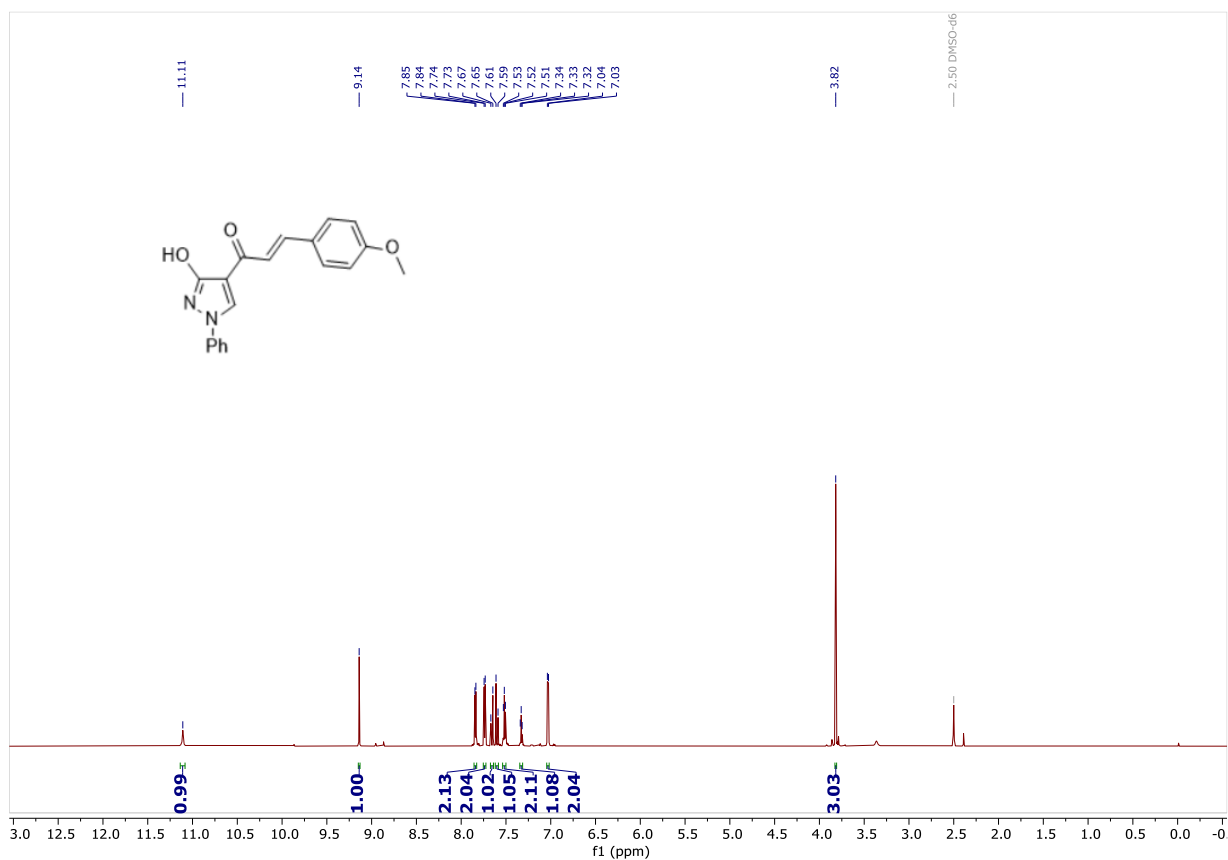

**Figure S71.** (2E)-1-(3-Hydroxy-1-phenyl-1H-pyrazol-4-yl)-3-(4-methoxyphenyl)prop-2-en-1-one (8d). <sup>1</sup>H NMR spectrum (700 MHz, DMSO-*d*<sub>6</sub>)

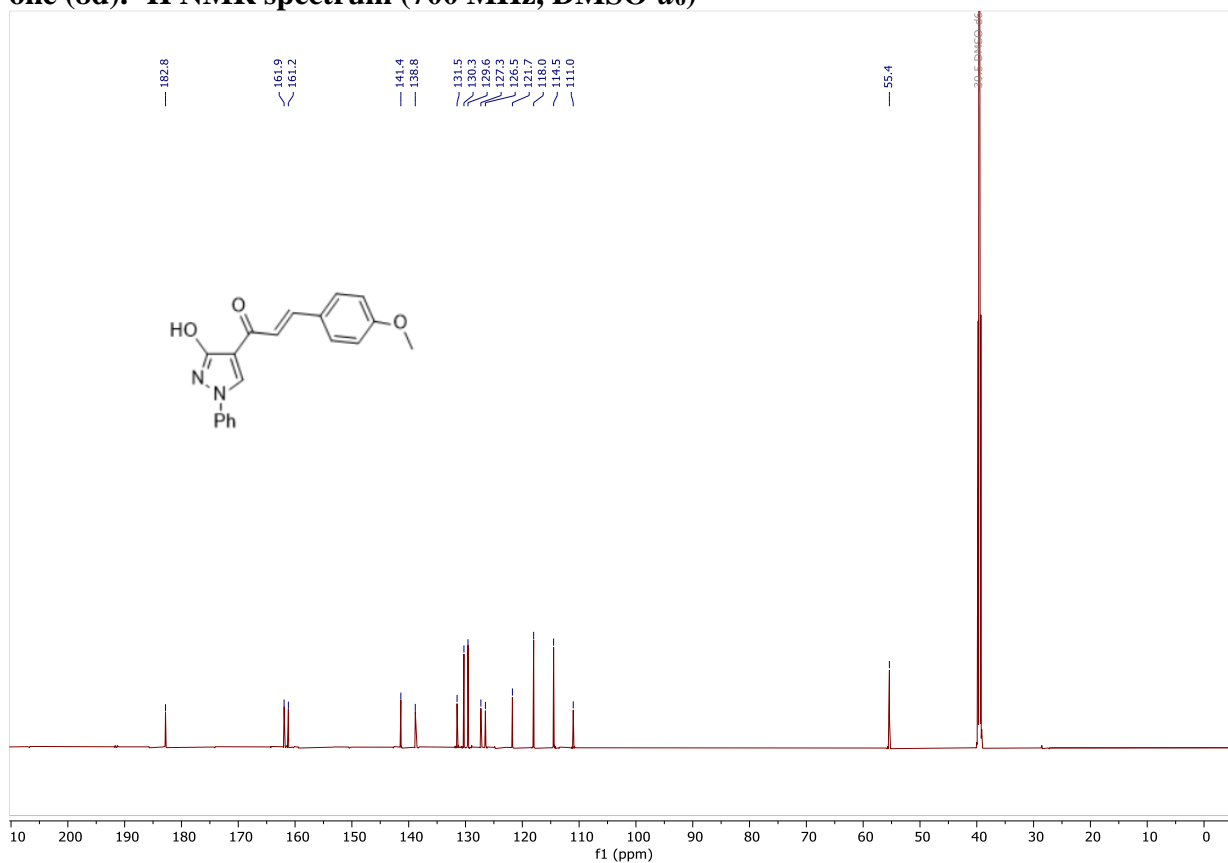

**Figure S72.** (2E)-1-(3-Hydroxy-1-phenyl-1H-pyrazol-4-yl)-3-(4-methoxyphenyl)prop-2-en-1-one (8d). <sup>13</sup>C NMR spectrum (176 MHz, DMSO-*d*<sub>6</sub>)

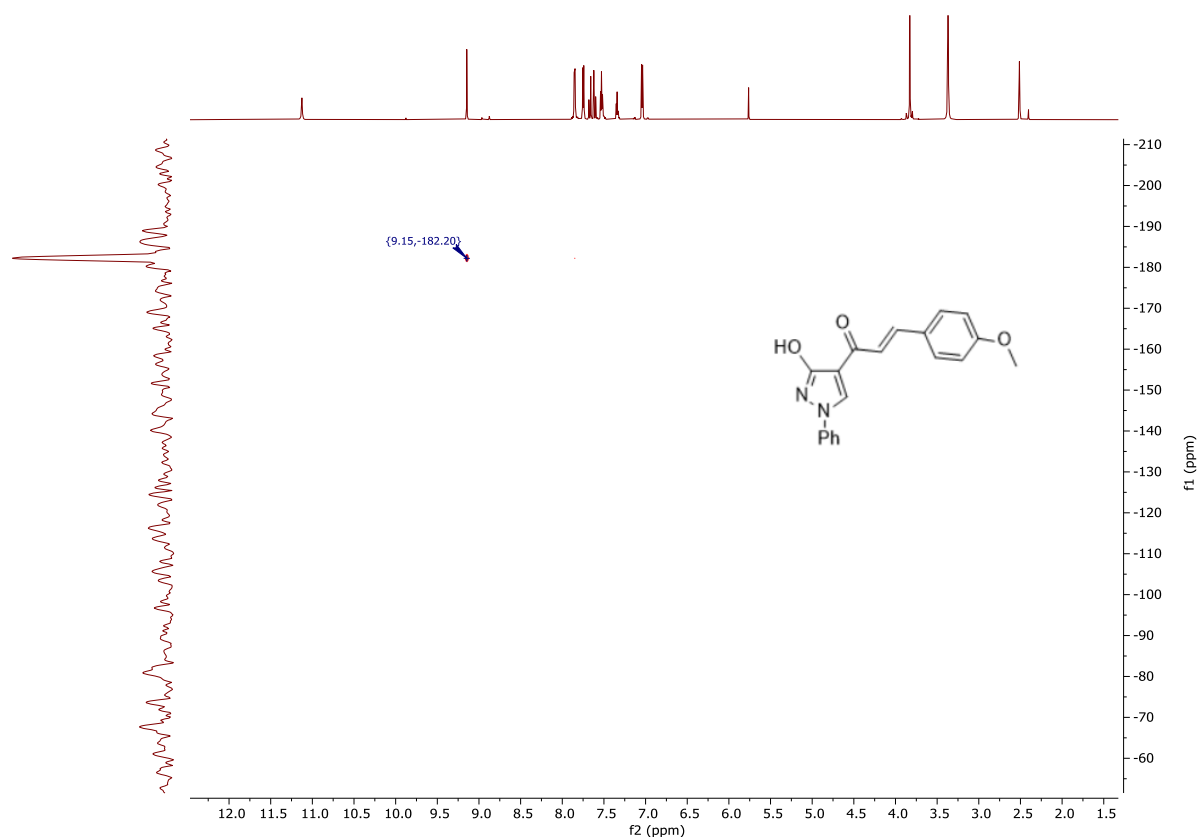

**Figure S73.** (2*E*)-1-(3-Hydroxy-1-phenyl-1*H*-pyrazol-4-yl)-3-(4-methoxyphenyl)prop-2-en-1-one (8d).  $^1\text{H}$ - $^{15}\text{N}$  HMBC NMR spectrum (71 MHz,  $\text{DMSO}-d_6$ )

**+MS, 4.3min #258**

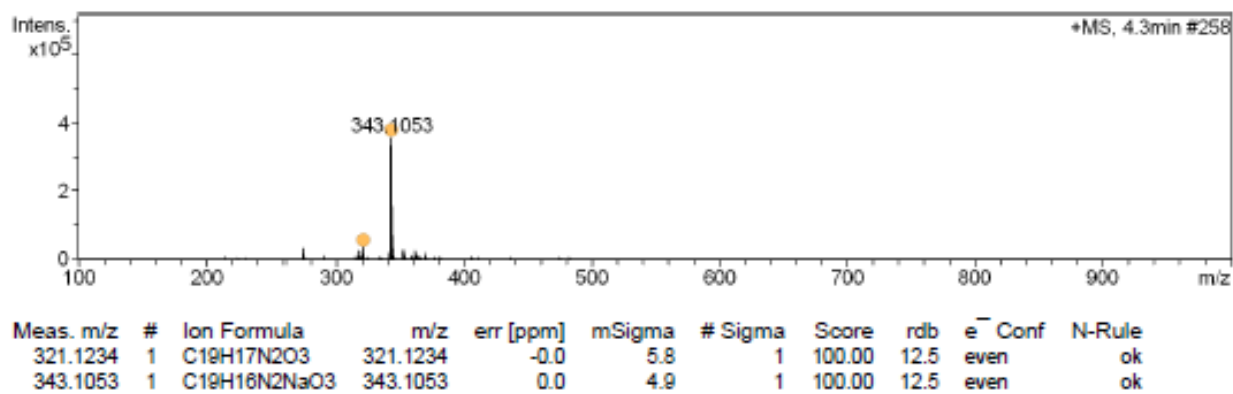

**Figure S74.** (2*E*)-1-(3-Hydroxy-1-phenyl-1*H*-pyrazol-4-yl)-3-(4-methoxyphenyl)prop-2-en-1-one (8d). HRMS (ESI-TOF).

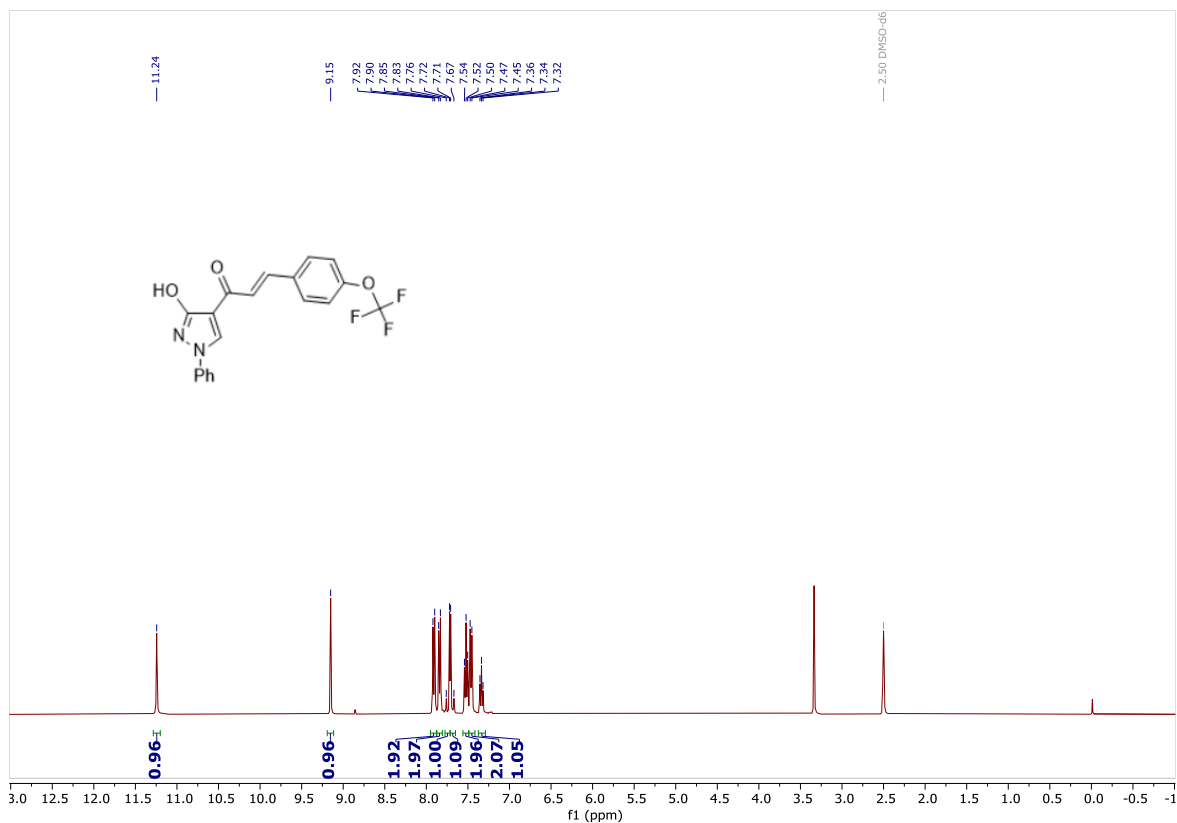

**Figure S75.** (2*E*)-1-(3-Hydroxy-1-phenyl-1*H*-pyrazol-4-yl)-3-[4-(trifluoromethoxy)phenyl]prop-2-en-1-one (8e). <sup>1</sup>H NMR spectrum (400 MHz, DMSO-*d*<sub>6</sub>)

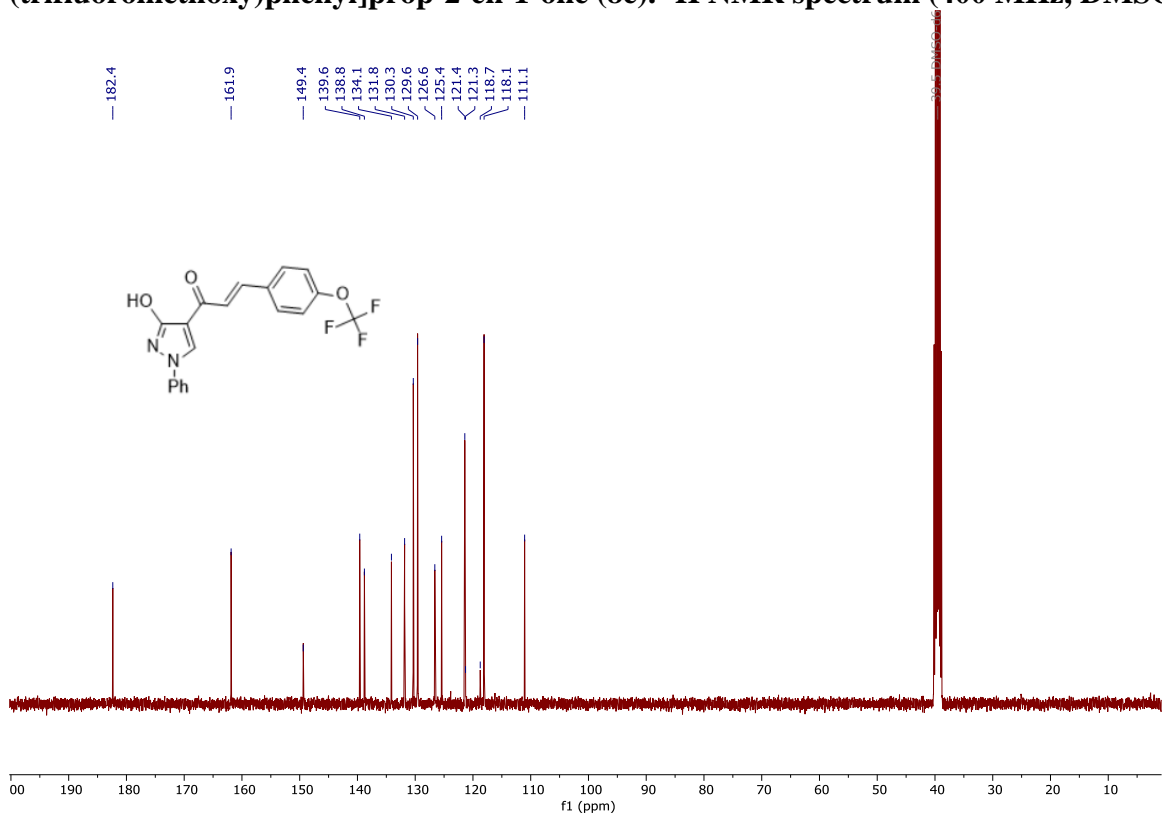

**Figure S76.** (2*E*)-1-(3-Hydroxy-1-phenyl-1*H*-pyrazol-4-yl)-3-[4-(trifluoromethoxy)phenyl]prop-2-en-1-one (8e). <sup>13</sup>C NMR spectrum (101 MHz, DMSO-*d*<sub>6</sub>)

+MS, 4.6min #273

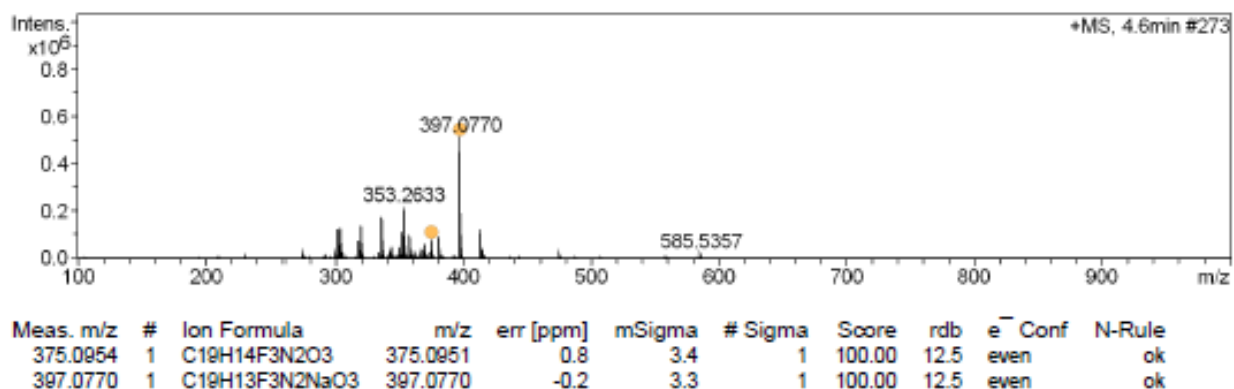

Figure S77. (2*E*)-1-(3-Hydroxy-1-phenyl-1*H*-pyrazol-4-yl)-3-[4-(trifluoromethoxy)phenyl]prop-2-en-1-one (8e). HRMS (ESI-TOF).

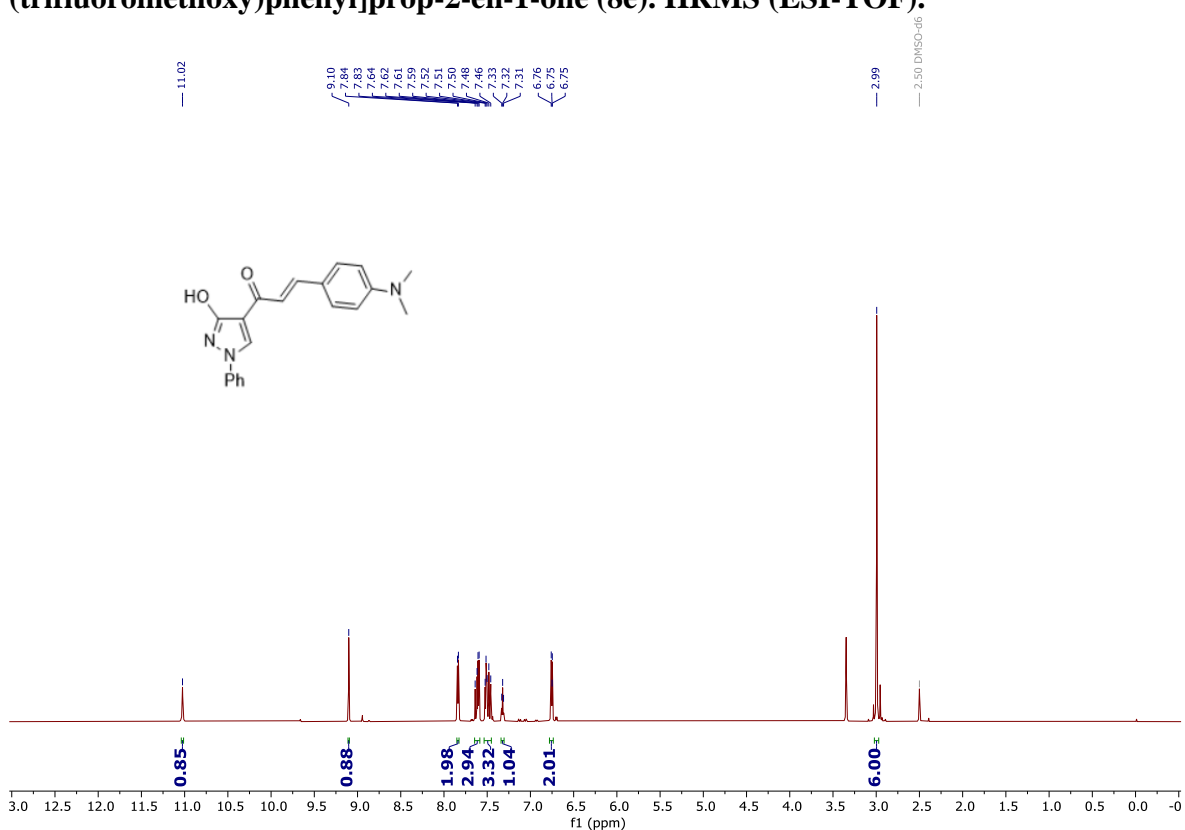

Figure S78. (2*E*)-3-[4-(Dimethylamino)phenyl]-1-(3-hydroxy-1-phenyl-1*H*-pyrazol-4-yl)prop-2-en-1-one (8f). <sup>1</sup>H NMR spectrum (700 MHz, DMSO-*d*<sub>6</sub>)

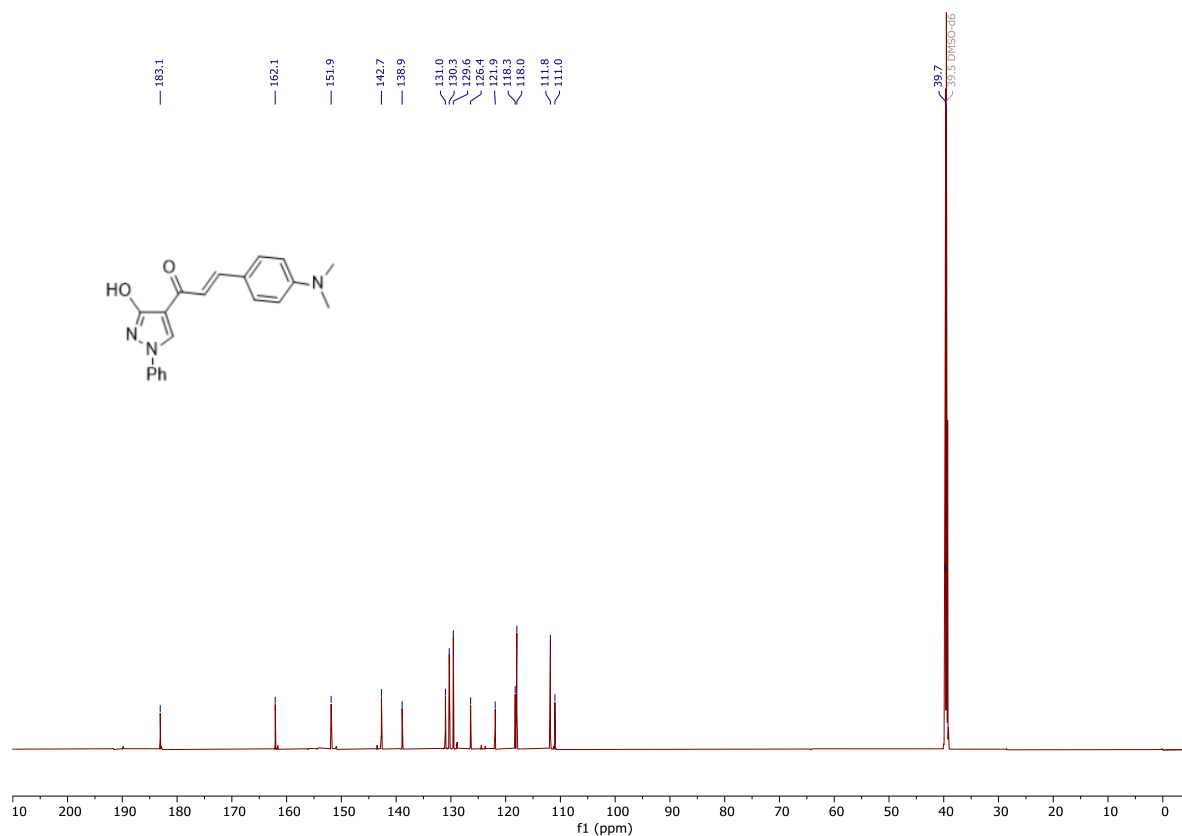

**Figure S79.** (2E)-3-[4-(Dimethylamino)phenyl]-1-(3-hydroxy-1-phenyl-1H-pyrazol-4-yl)prop-2-en-1-one (8f). <sup>13</sup>C NMR spectrum (176 MHz, DMSO-*d*<sub>6</sub>)

**+MS, 5.6min #333**

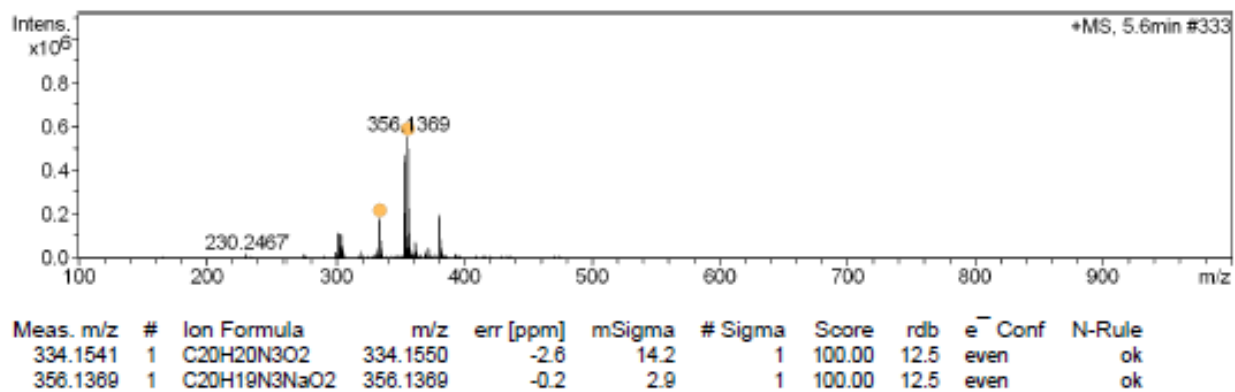

**Figure S80.** (2E)-3-[4-(Dimethylamino)phenyl]-1-(3-hydroxy-1-phenyl-1H-pyrazol-4-yl)prop-2-en-1-one (8f). HRMS (ESI-TOF).

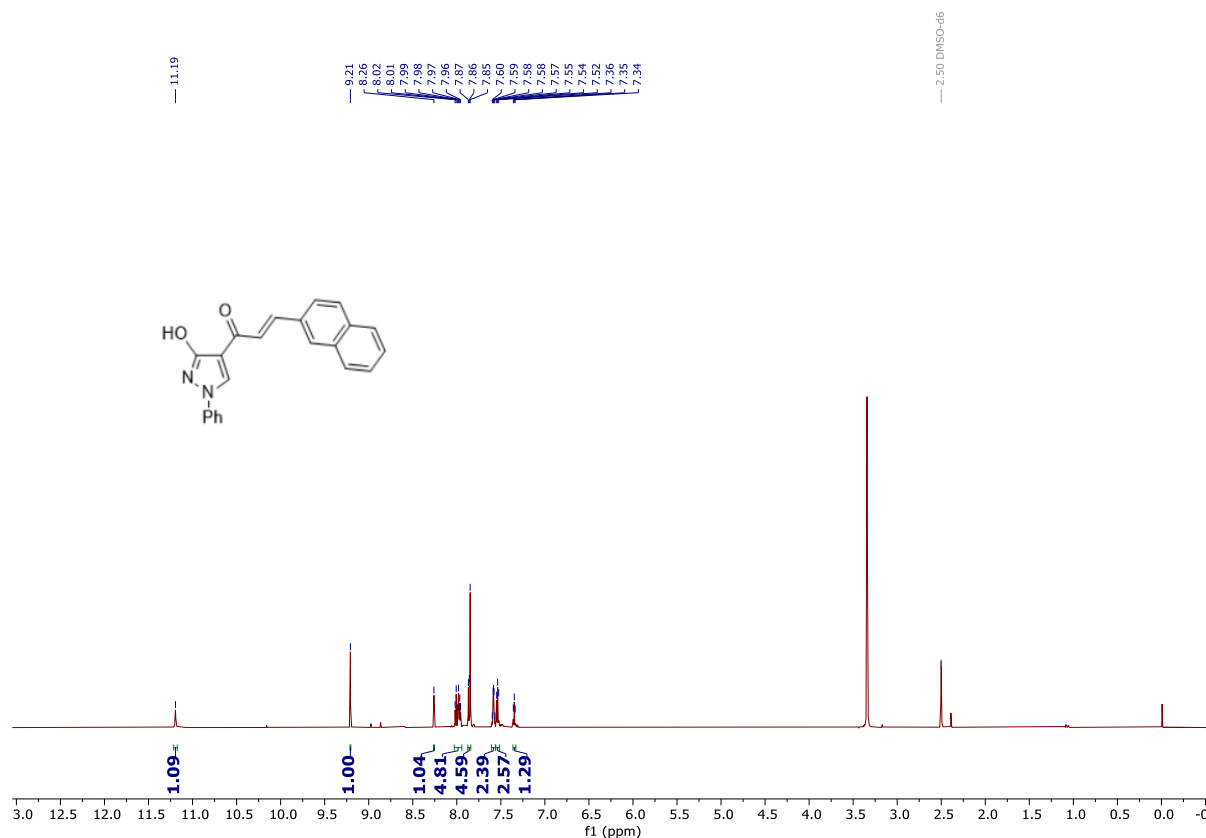

**Figure S81. (2E)-1-(3-Hydroxy-1-phenyl-1H-pyrazol-4-yl)-3-(naphthalen-2-yl)prop-2-en-1-one (8g). <sup>1</sup>H NMR spectrum (700 MHz, DMSO-*d*<sub>6</sub>)**

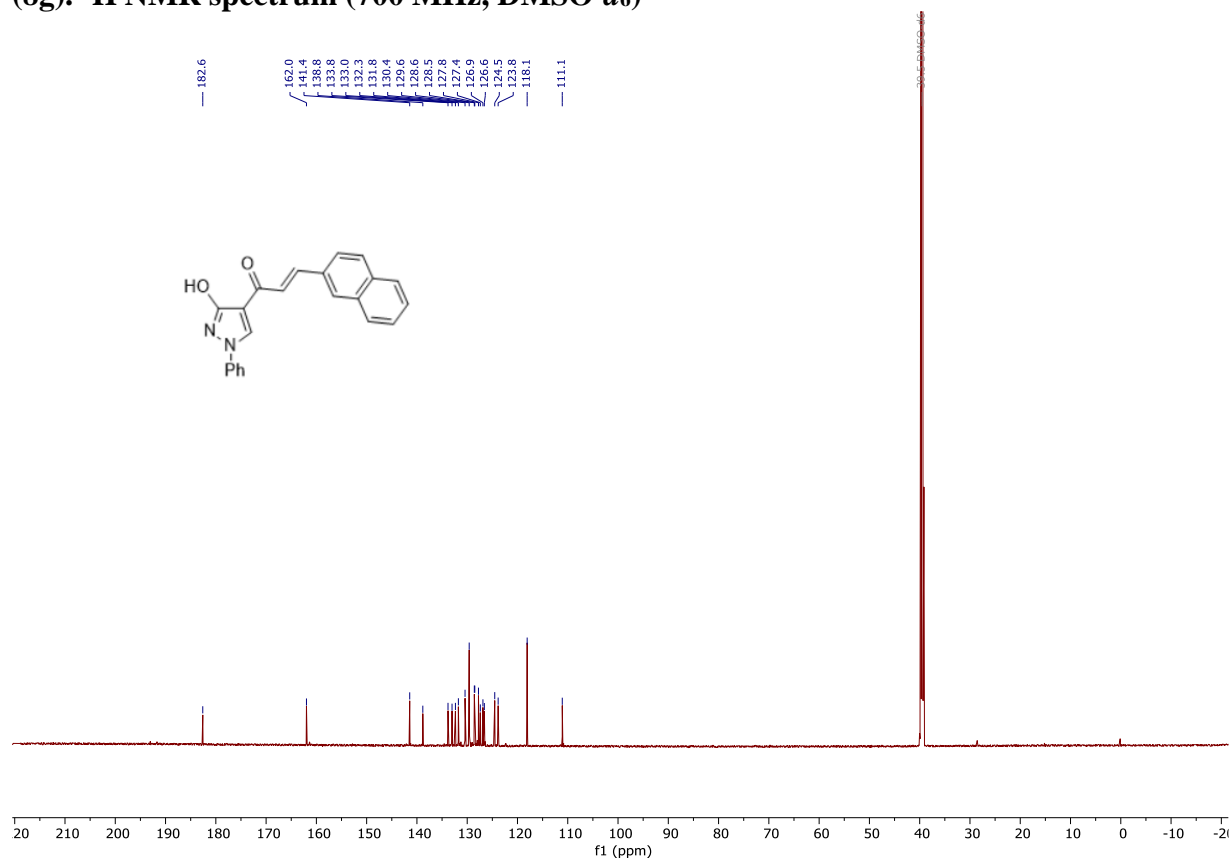

**Figure S82. (2E)-1-(3-Hydroxy-1-phenyl-1H-pyrazol-4-yl)-3-(naphthalen-2-yl)prop-2-en-1-one (8g). <sup>13</sup>C NMR spectrum (176 MHz, DMSO-*d*<sub>6</sub>)**

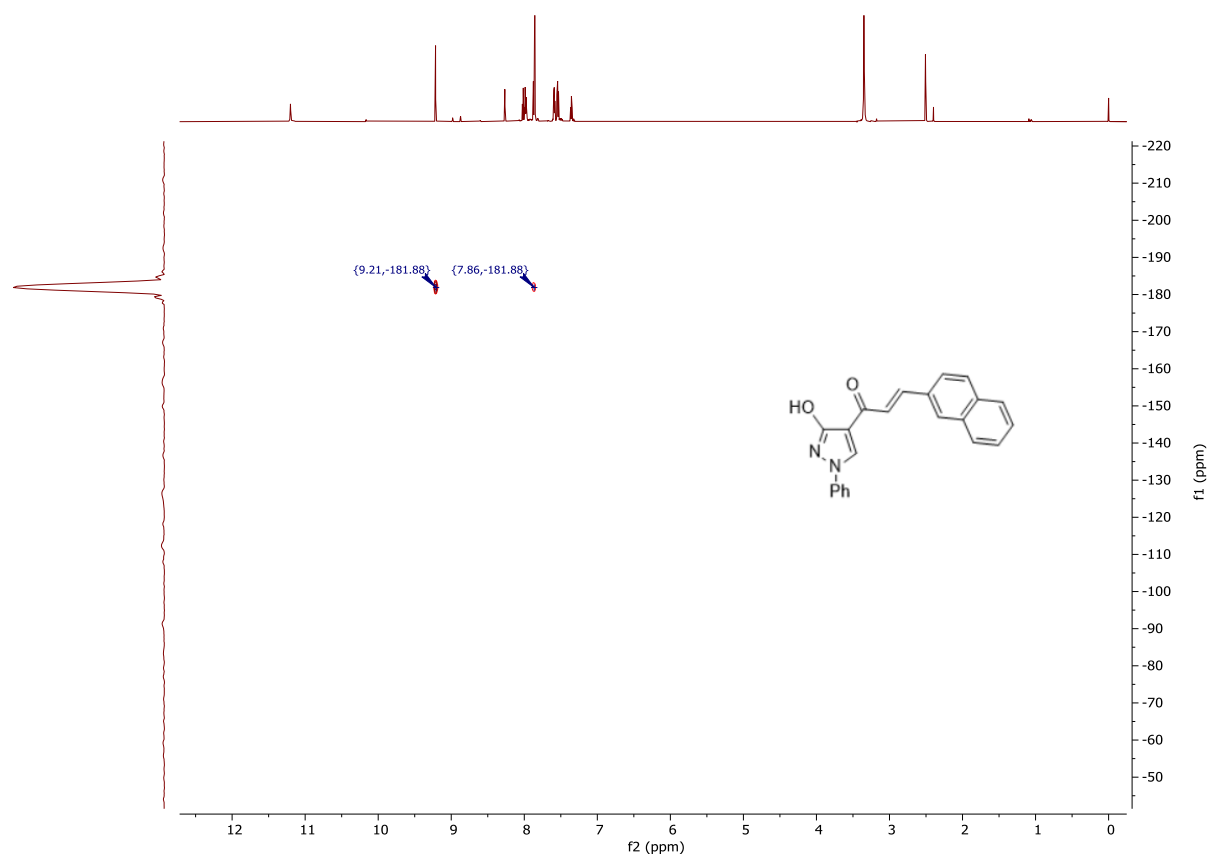

Figure S83. (2*E*)-1-(3-Hydroxy-1-phenyl-1*H*-pyrazol-4-yl)-3-(naphthalen-2-yl)prop-2-en-1-one (8g).  $^1\text{H}$ - $^{15}\text{N}$  HMBC NMR spectrum (71 MHz,  $\text{DMSO}-d_6$ )

+MS, 5.6min #335

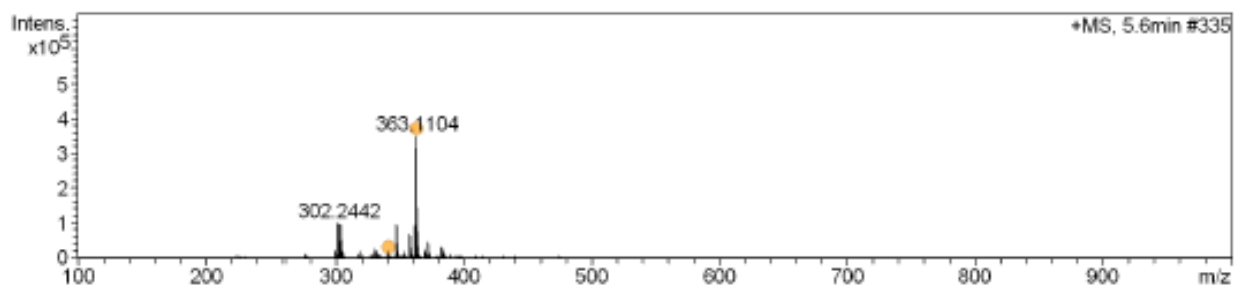

| Meas. m/z | # | Ion Formula                                                     | m/z      | err [ppm] | mSigma | # Sigma | Score  | rdB  | e <sup>-</sup> | Conf | N-Rule |
|-----------|---|-----------------------------------------------------------------|----------|-----------|--------|---------|--------|------|----------------|------|--------|
| 341.1282  | 1 | C <sub>22</sub> H <sub>17</sub> N <sub>2</sub> O <sub>2</sub>   | 341.1285 | 0.9       | 37.1   | 1       | 100.00 | 15.5 | even           |      | ok     |
| 363.1104  | 1 | C <sub>22</sub> H <sub>16</sub> N <sub>2</sub> NaO <sub>2</sub> | 363.1104 | -0.1      | 4.6    | 1       | 100.00 | 15.5 | even           |      | ok     |

Figure S84. (2*E*)-1-(3-Hydroxy-1-phenyl-1*H*-pyrazol-4-yl)-3-(naphthalen-2-yl)prop-2-en-1-one (8g). HRMS (ESI-TOF).

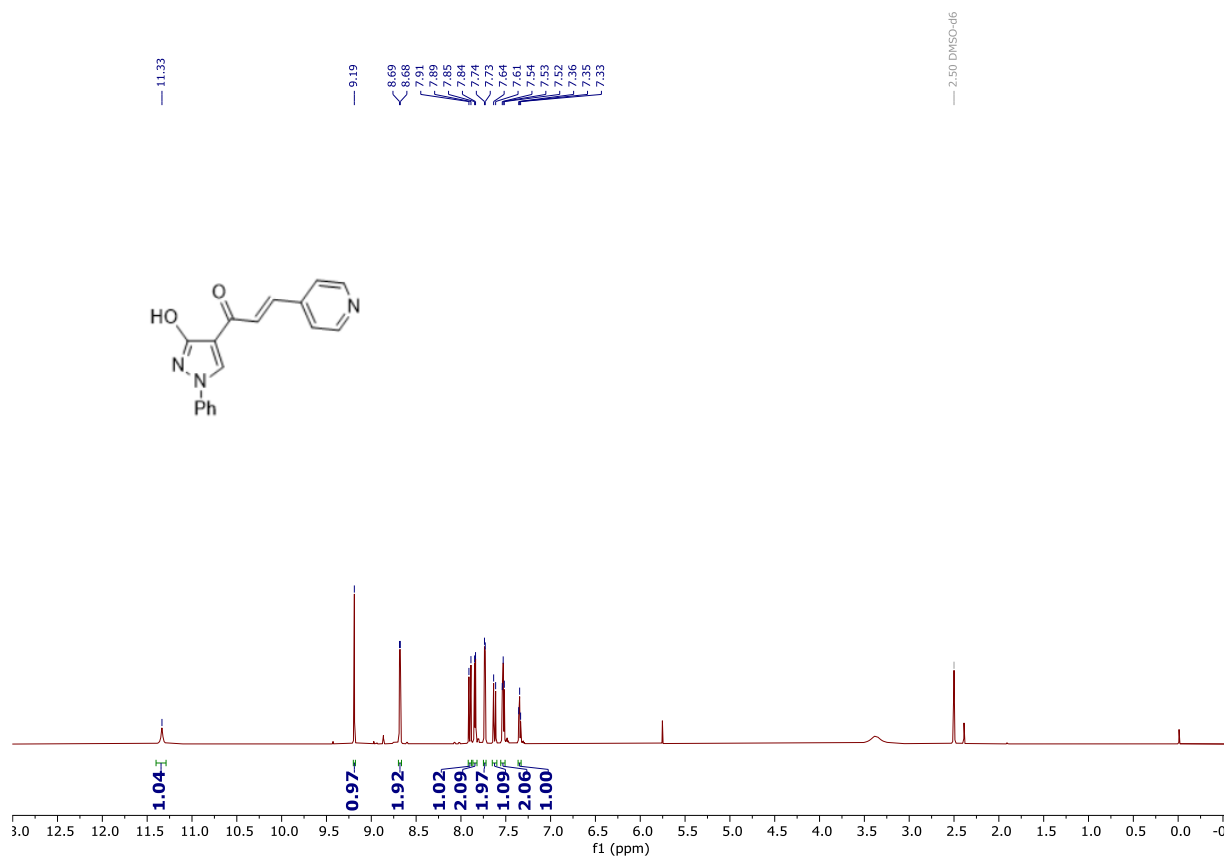



+MS, 8.0min #479

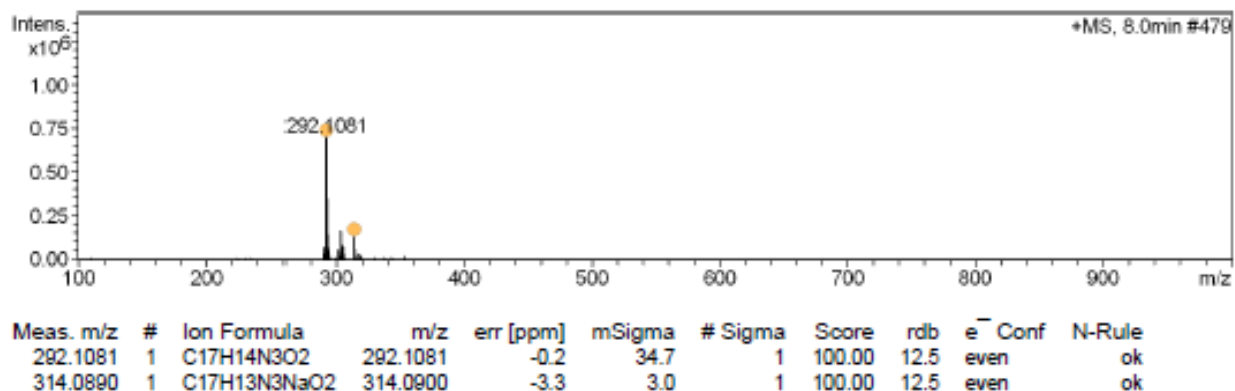

Figure S87. (2*E*)-1-(3-Hydroxy-1-phenyl-1*H*-pyrazol-4-yl)-3-(pyridin-4-yl)prop-2-en-1-one (8h). HRMS (ESI-TOF).

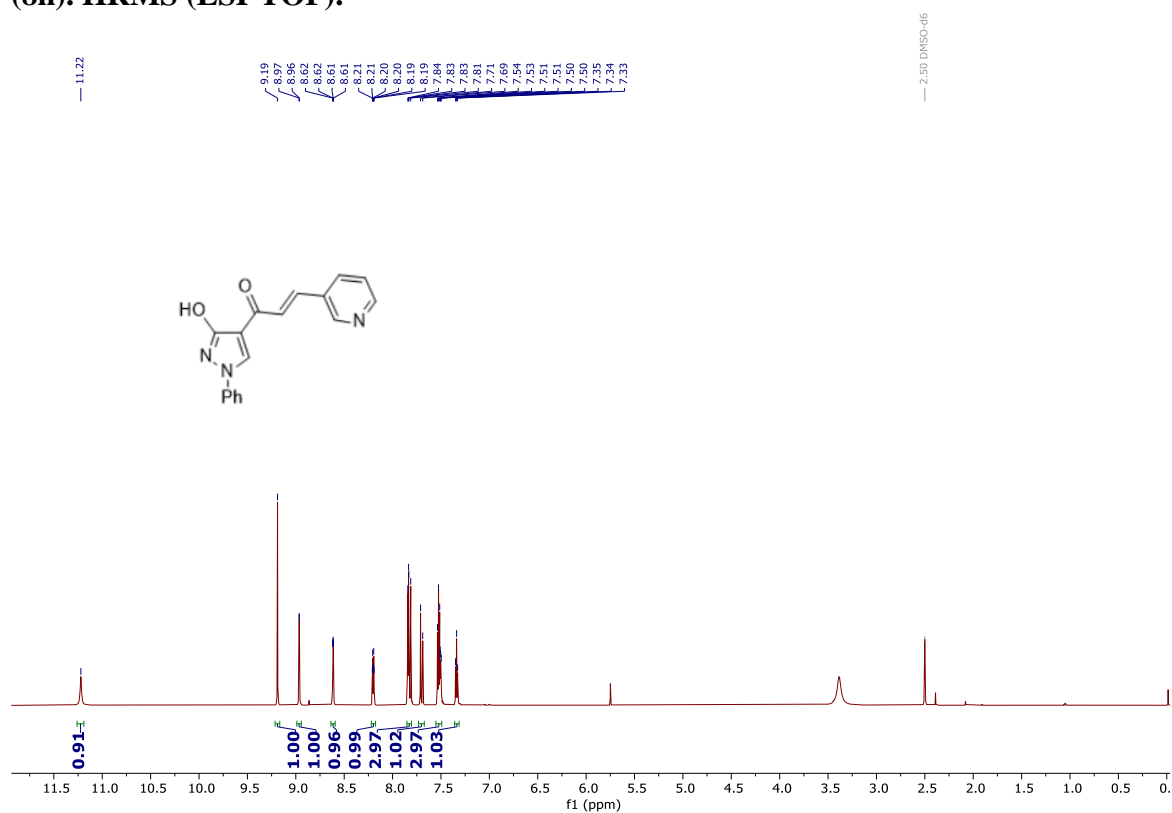

Figure S88. (2*E*)-1-(3-Hydroxy-1-phenyl-1*H*-pyrazol-4-yl)-3-(pyridin-3-yl)prop-2-en-1-one (8i). <sup>1</sup>H NMR spectrum (700 MHz, DMSO-*d*<sub>6</sub>)

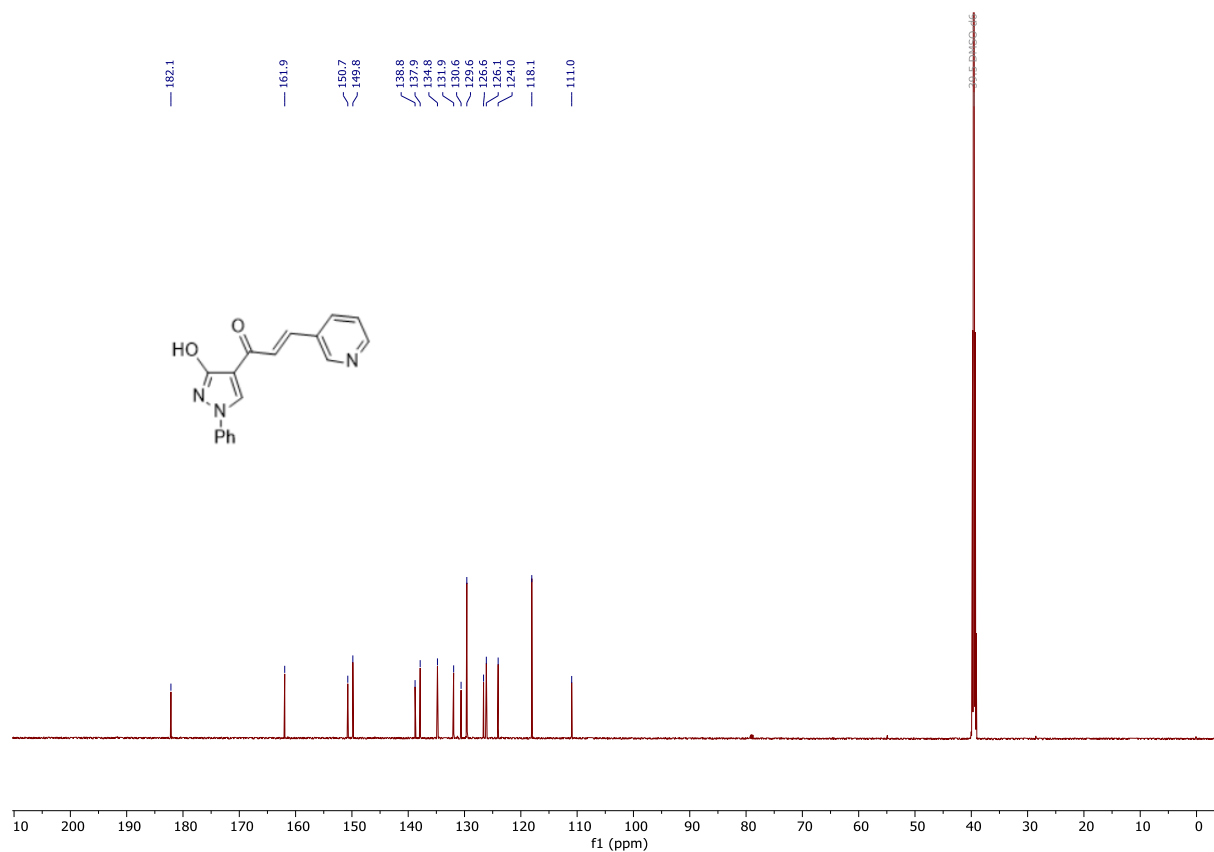

**Figure S89.** (2*E*)-1-(3-Hydroxy-1-phenyl-1*H*-pyrazol-4-yl)-3-(pyridin-3-yl)prop-2-en-1-one (8i). <sup>13</sup>C NMR spectrum (176 MHz, DMSO-*d*<sub>6</sub>)

**+MS, 8.6min #515**

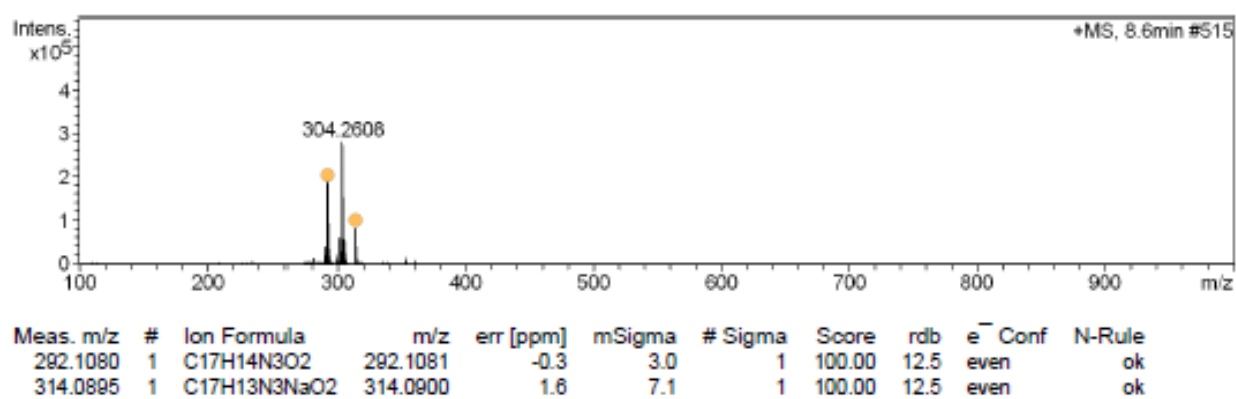

**Figure S90.** (2*E*)-1-(3-Hydroxy-1-phenyl-1*H*-pyrazol-4-yl)-3-(pyridin-3-yl)prop-2-en-1-one (8i). HRMS (ESI-TOF).

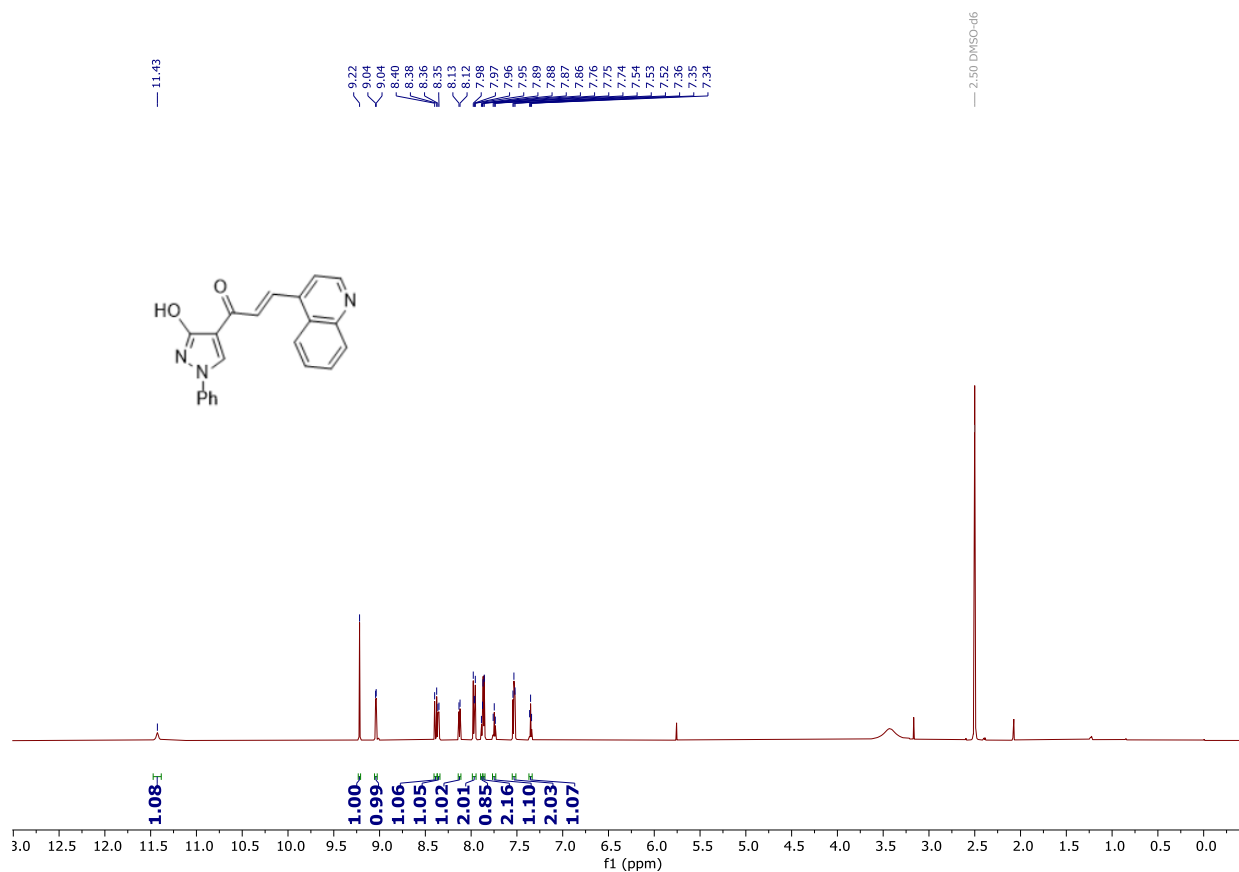

**Figure S91.** (2E)-1-(3-Hydroxy-1-phenyl-1H-pyrazol-4-yl)-3-(quinolin-4-yl)prop-2-en-1-one (8j). <sup>1</sup>H NMR spectrum (700 MHz, DMSO-*d*<sub>6</sub>)

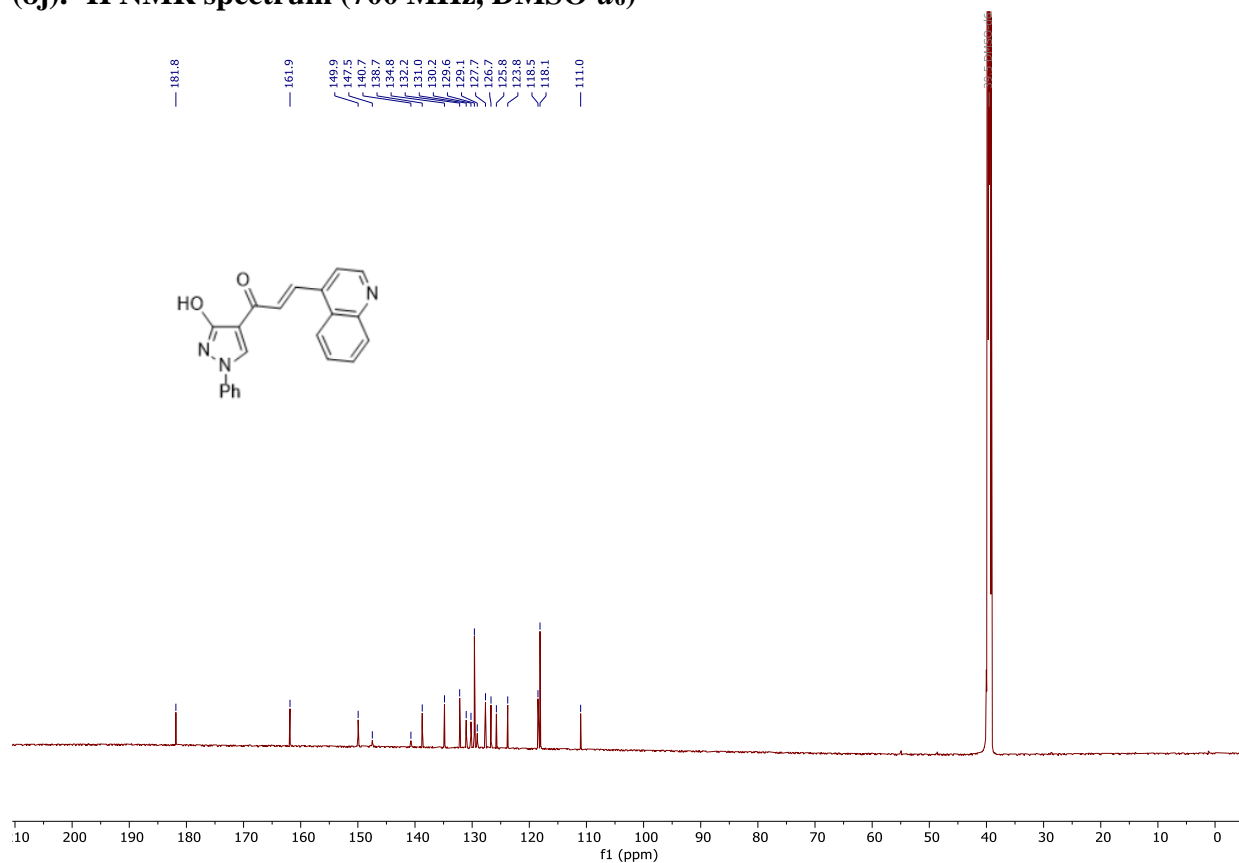

**Figure S92.** (2E)-1-(3-Hydroxy-1-phenyl-1H-pyrazol-4-yl)-3-(quinolin-4-yl)prop-2-en-1-one (8j). <sup>13</sup>C NMR spectrum (176 MHz, DMSO-*d*<sub>6</sub>)

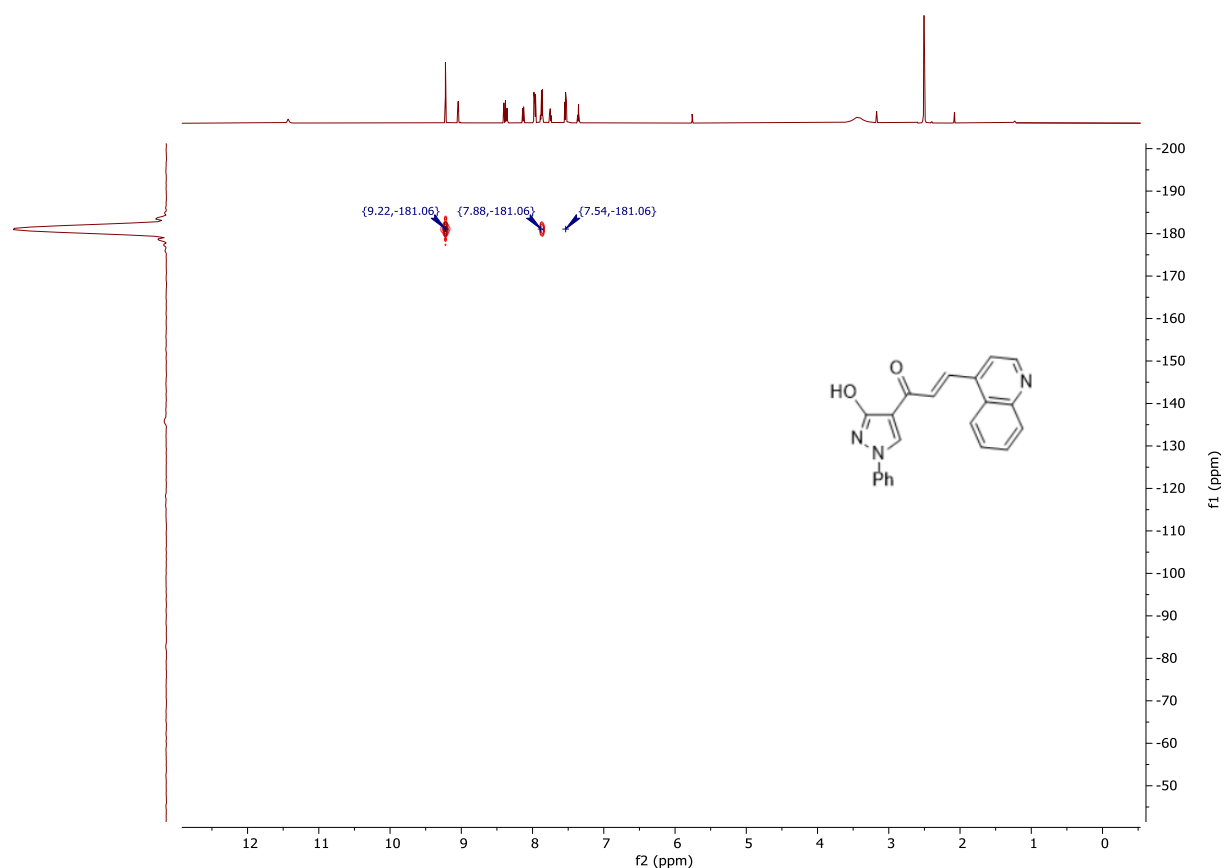

Figure S93. (2E)-1-(3-Hydroxy-1-phenyl-1H-pyrazol-4-yl)-3-(quinolin-4-yl)prop-2-en-1-one (8j).  $^1\text{H}$ - $^{15}\text{N}$  HMBC NMR spectrum (71 MHz,  $\text{DMSO}-d_6$ )

+MS, 3.5min #207

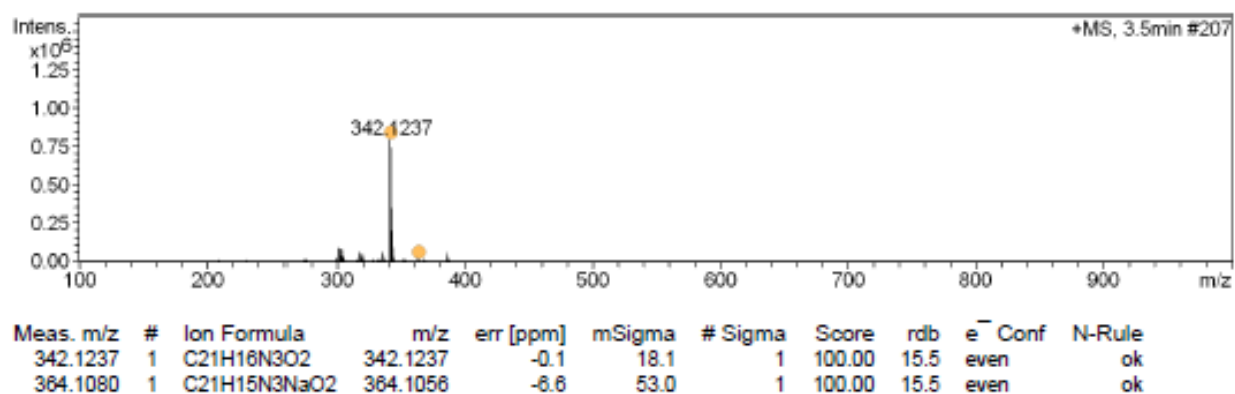

Figure S94. (2E)-1-(3-Hydroxy-1-phenyl-1H-pyrazol-4-yl)-3-(quinolin-4-yl)prop-2-en-1-one (8j). HRMS (ESI-TOF).

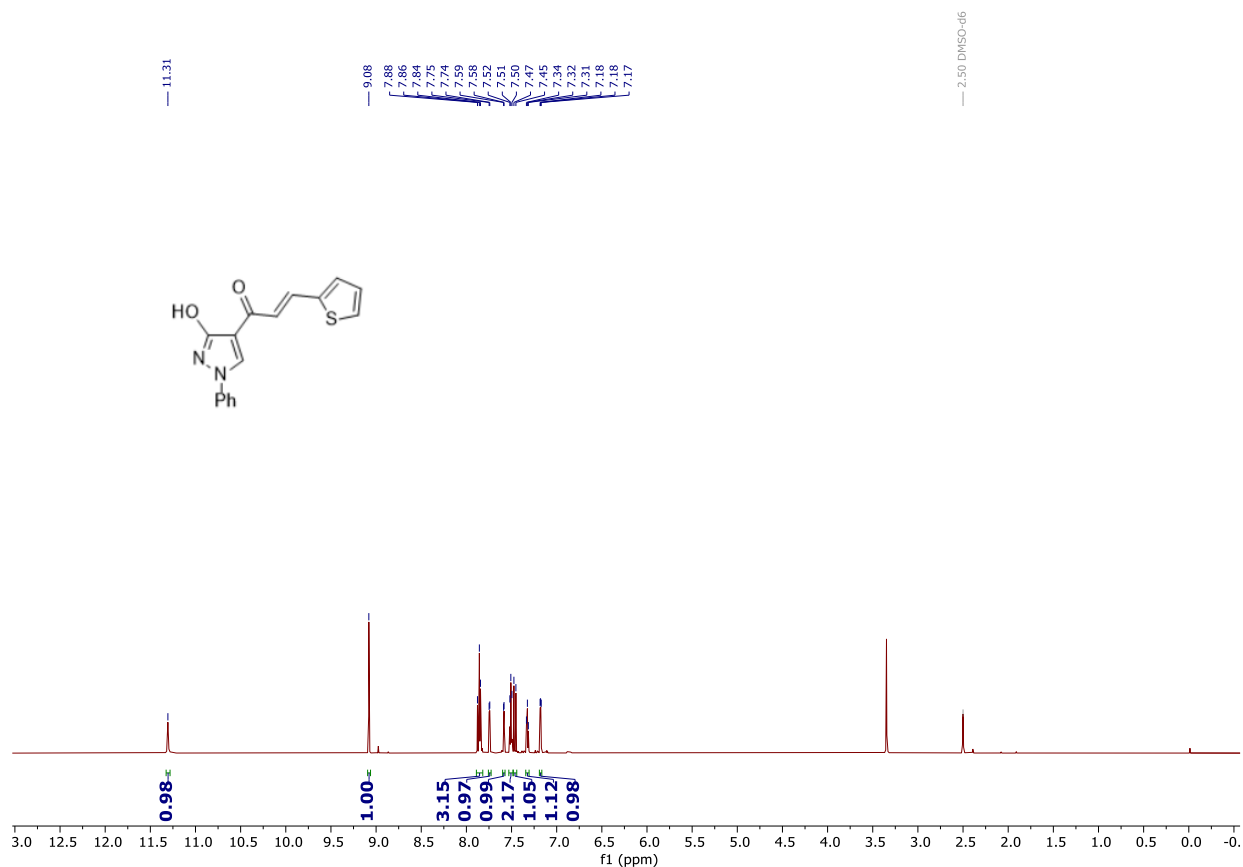

**Figure S95. (2*E*)-1-(3-Hydroxy-1-phenyl-1*H*-pyrazol-4-yl)-3-(thiophen-2-yl)prop-2-en-1-one (8k). <sup>1</sup>H NMR spectrum (700 MHz, DMSO-*d*<sub>6</sub>)**

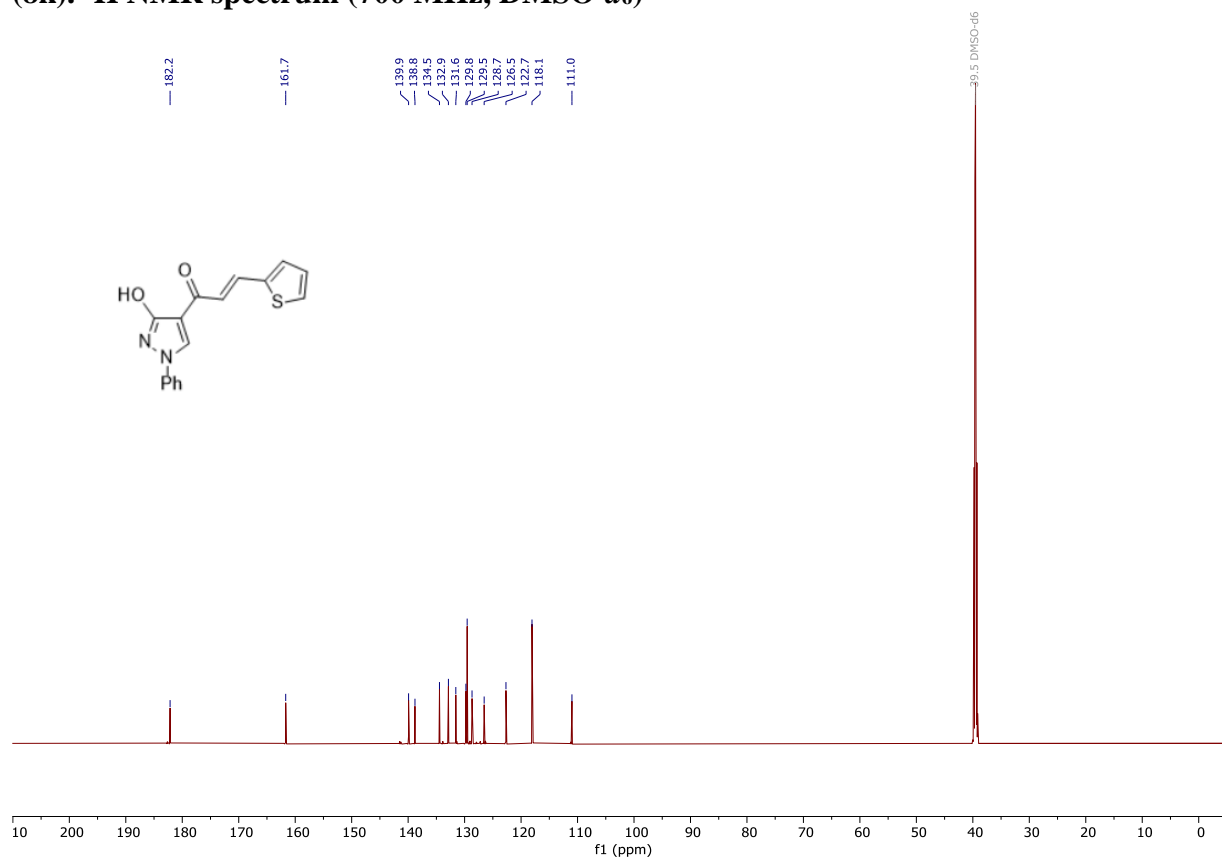

**Figure S96. (2*E*)-1-(3-Hydroxy-1-phenyl-1*H*-pyrazol-4-yl)-3-(thiophen-2-yl)prop-2-en-1-one (8k). <sup>13</sup>C NMR spectrum (176 MHz, DMSO-*d*<sub>6</sub>)**

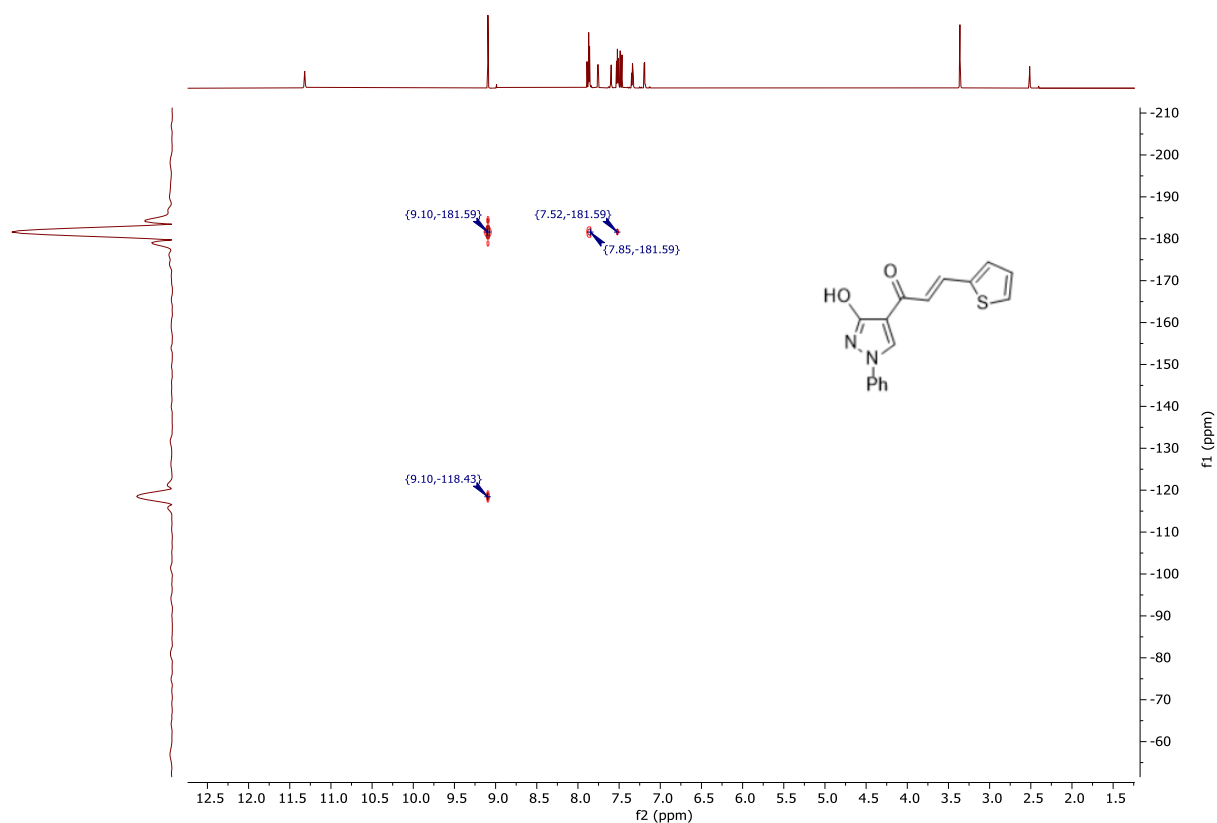

Figure S97. (2E)-1-(3-Hydroxy-1-phenyl-1H-pyrazol-4-yl)-3-(thiophen-2-yl)prop-2-en-1-one (8k).  $^1\text{H}$ - $^{15}\text{N}$  HMBC NMR spectrum (71 MHz,  $\text{DMSO}-d_6$ )

+MS, 8.9min #534

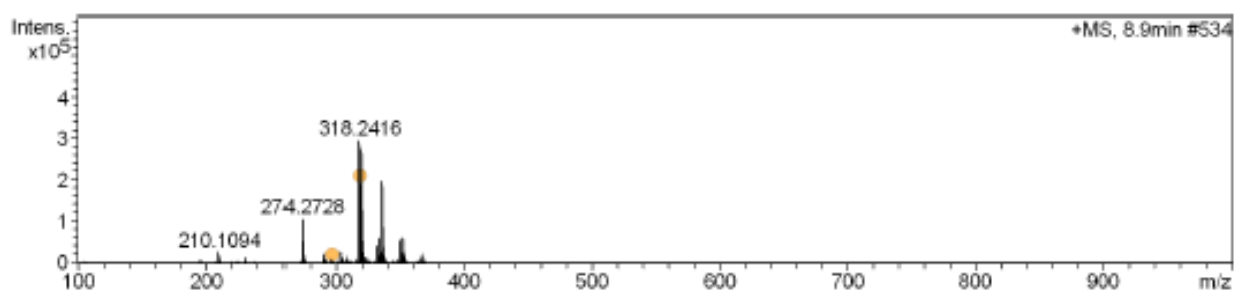

| Meas. m/z | # | Ion Formula                                                       | m/z      | err [ppm] | mSigma | # Sigma | Score  | rdB  | e <sup>-</sup> | Conf | N-Rule |
|-----------|---|-------------------------------------------------------------------|----------|-----------|--------|---------|--------|------|----------------|------|--------|
| 297.0683  | 1 | C <sub>16</sub> H <sub>13</sub> N <sub>2</sub> O <sub>2</sub> S   | 297.0692 | -3.0      | 34.6   | 1       | 100.00 | 11.5 | even           |      | ok     |
| 319.0512  | 1 | C <sub>16</sub> H <sub>12</sub> N <sub>2</sub> NaO <sub>2</sub> S | 319.0512 | -0.2      | 6.8    | 1       | 100.00 | 11.5 | even           |      | ok     |

Figure S98. (2E)-1-(3-Hydroxy-1-phenyl-1H-pyrazol-4-yl)-3-(thiophen-2-yl)prop-2-en-1-one (8k). HRMS (ESI-TOF).

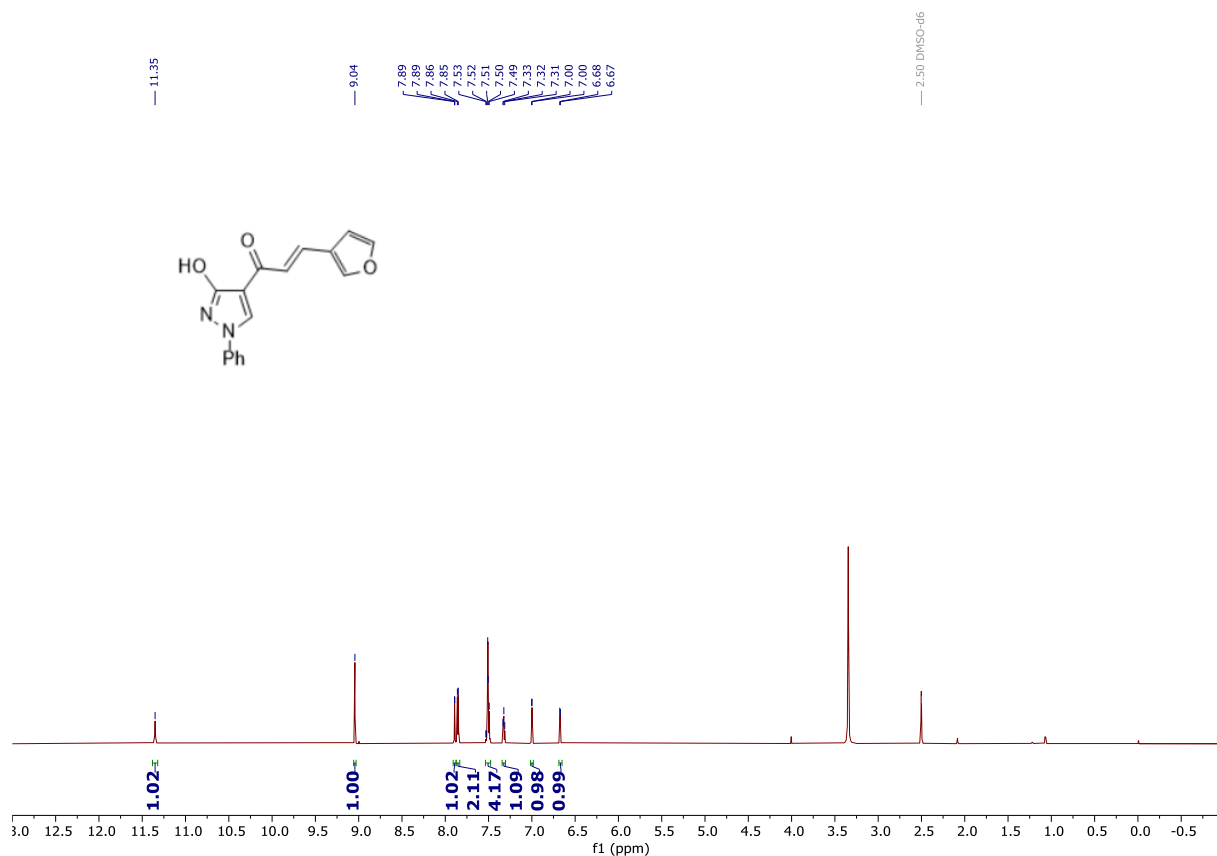

**Figure S99. (2E)-3-(Furan-3-yl)-1-(3-hydroxy-1-phenyl-1H-pyrazol-4-yl)prop-2-en-1-one (8l). <sup>1</sup>H NMR spectrum (700 MHz, DMSO-*d*<sub>6</sub>)**

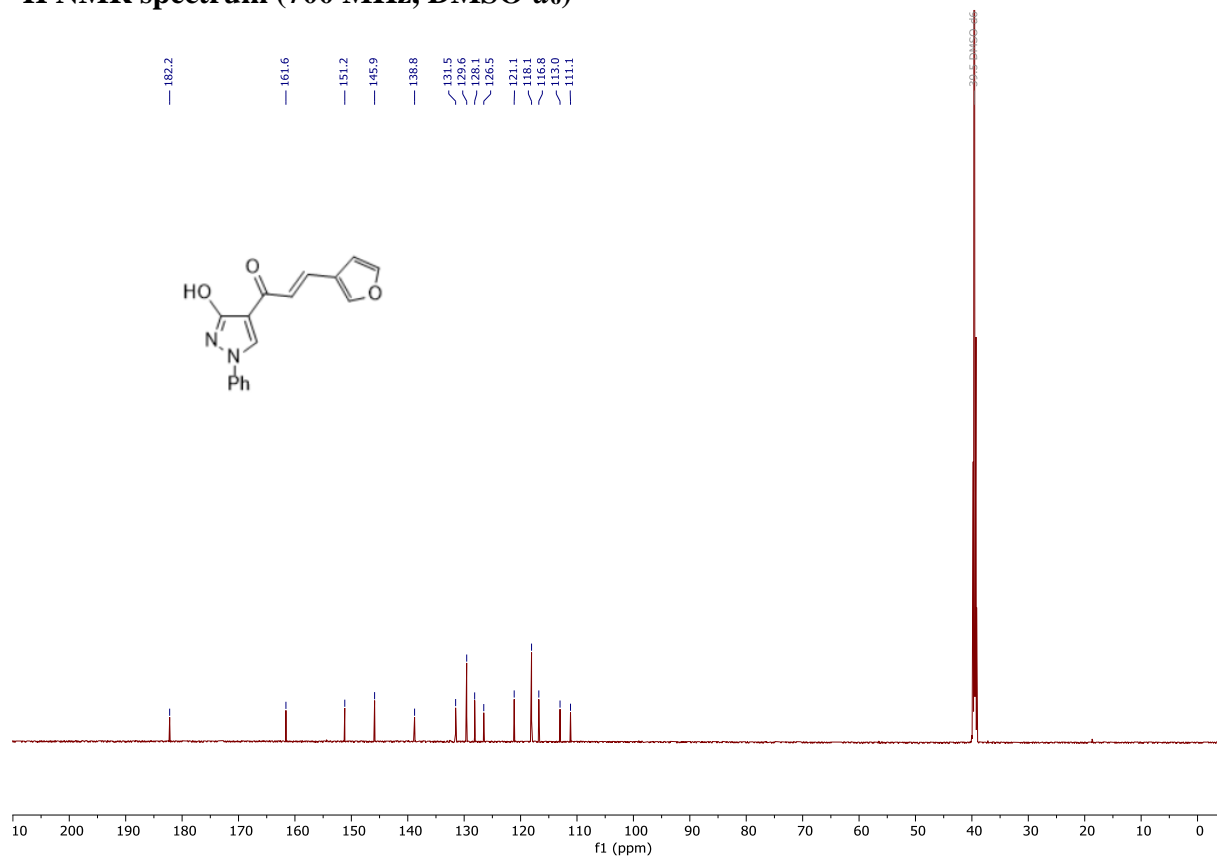

**Figure S100. (2E)-3-(Furan-3-yl)-1-(3-hydroxy-1-phenyl-1H-pyrazol-4-yl)prop-2-en-1-one (8l). <sup>13</sup>C NMR spectrum (176 MHz, DMSO-*d*<sub>6</sub>)**

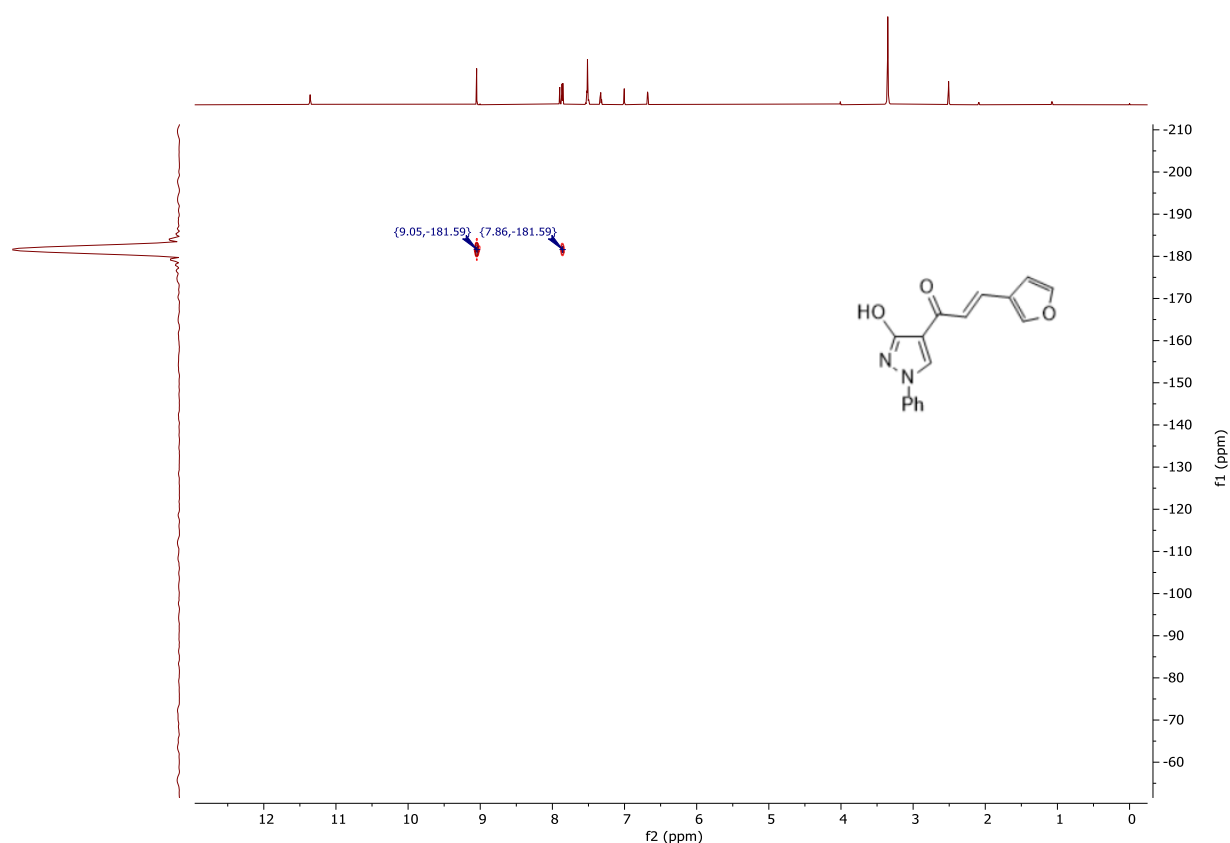

Figure S101. (2*E*)-3-(Furan-3-yl)-1-(3-hydroxy-1-phenyl-1*H*-pyrazol-4-yl)prop-2-en-1-one (8l).  $^1\text{H}$ - $^{15}\text{N}$  HMBC NMR spectrum (71 MHz,  $\text{DMSO}-d_6$ )

+MS, 5.3min #318

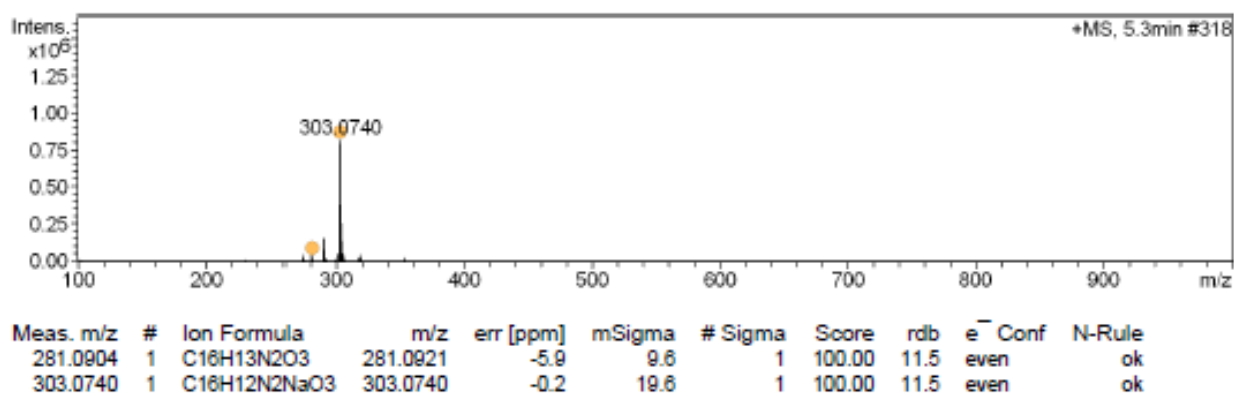

Figure S102. (2*E*)-3-(Furan-3-yl)-1-(3-hydroxy-1-phenyl-1*H*-pyrazol-4-yl)prop-2-en-1-one (8l). HRMS (ESI-TOF).



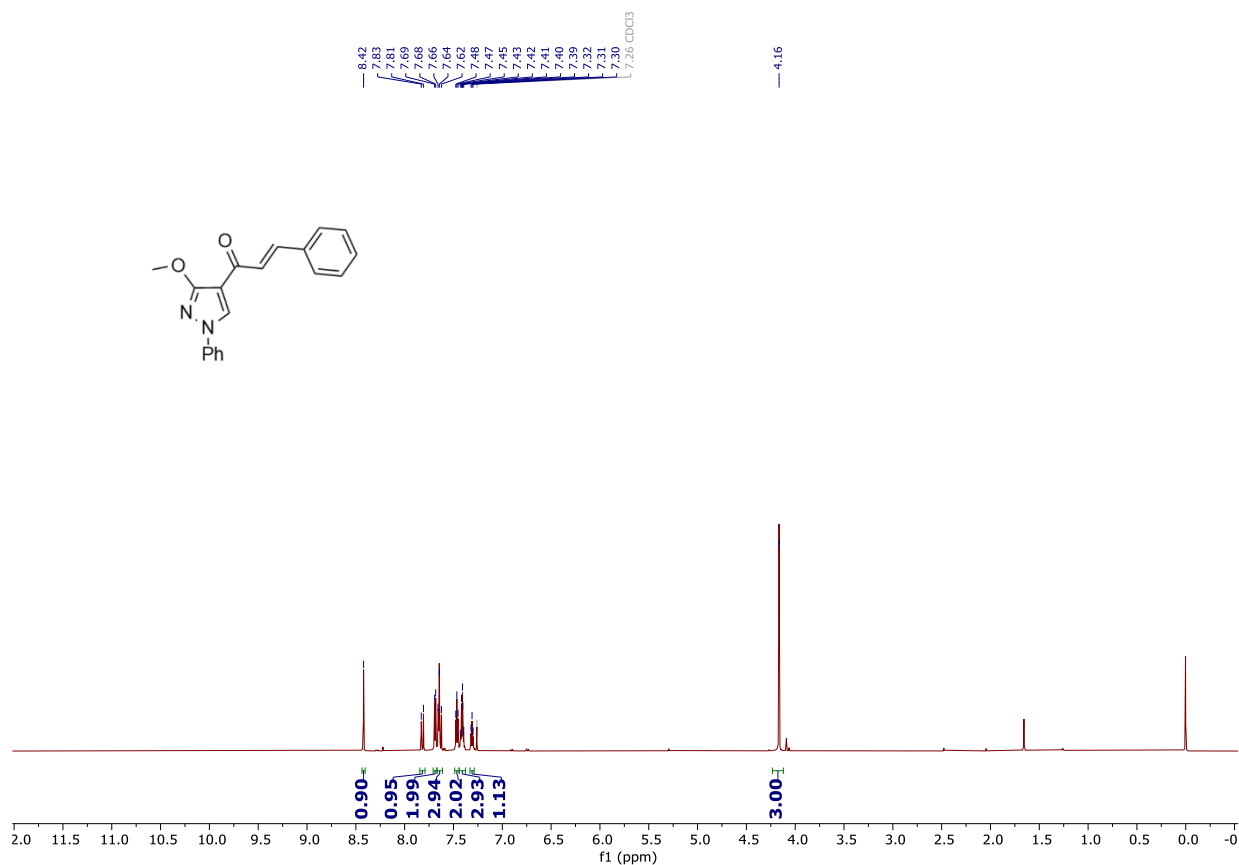

**Figure S103. (2E)-1-(3-Methoxy-1-phenyl-1H-pyrazol-4-yl)-3-phenylprop-2-en-1-one (9a). <sup>1</sup>H NMR spectrum (700 MHz, CDCl<sub>3</sub>)**

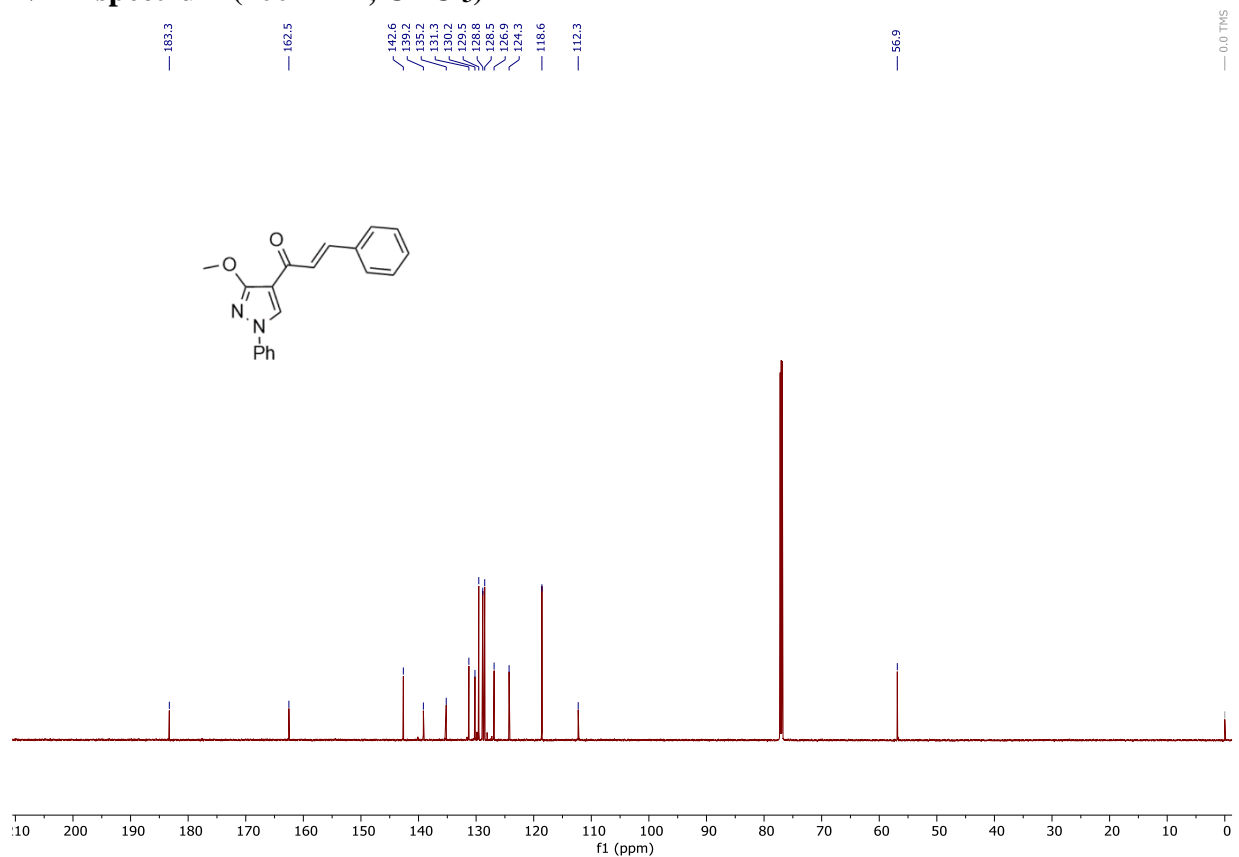

**Figure S104. (2E)-1-(3-Methoxy-1-phenyl-1H-pyrazol-4-yl)-3-phenylprop-2-en-1-one (9a). <sup>13</sup>C NMR spectrum (176 MHz, CDCl<sub>3</sub>)**

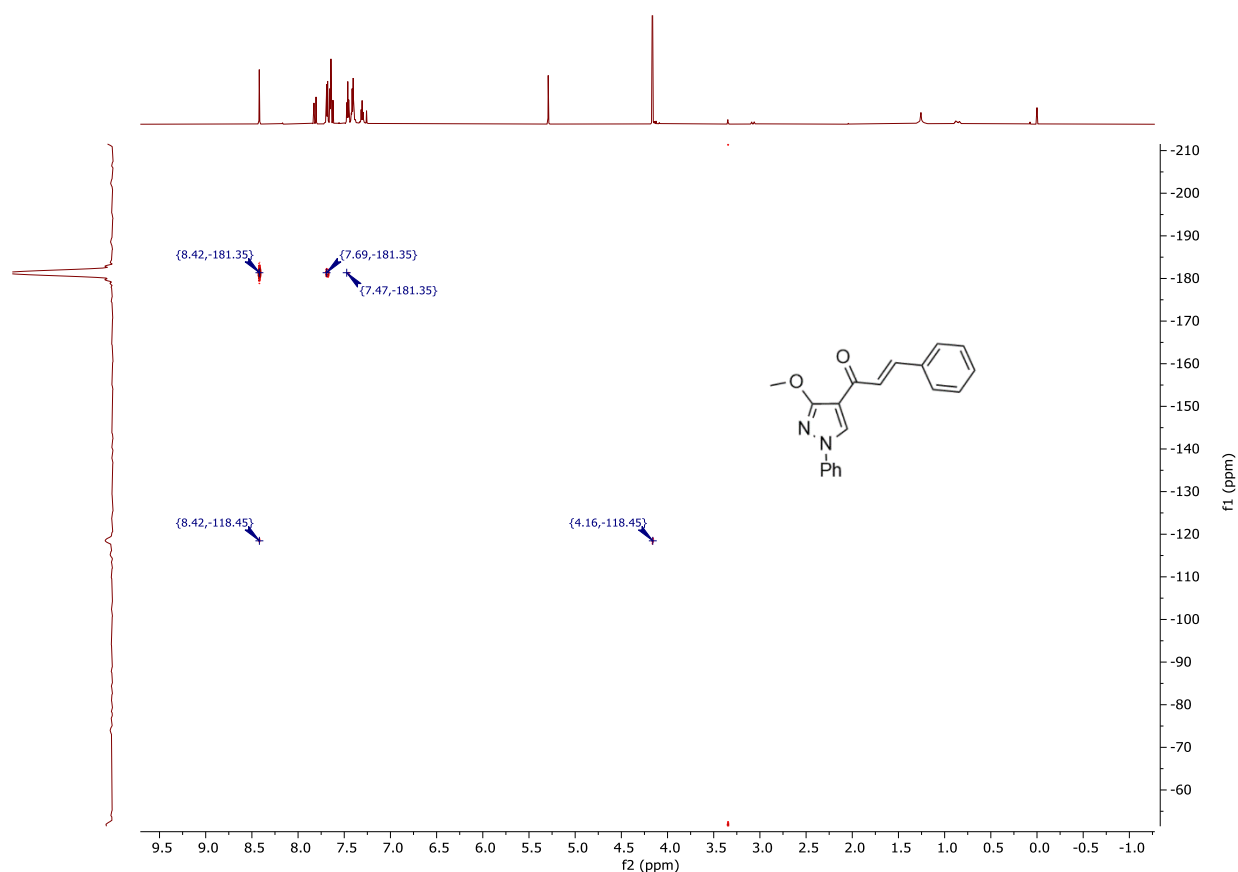

**Figure S105.** (2E)-1-(3-Methoxy-1-phenyl-1H-pyrazol-4-yl)-3-phenylprop-2-en-1-one (9a).  $^1\text{H}$ - $^{15}\text{N}$  HMBC NMR spectrum (71 MHz,  $\text{CDCl}_3$ )

**+MS, 3.8min #227**

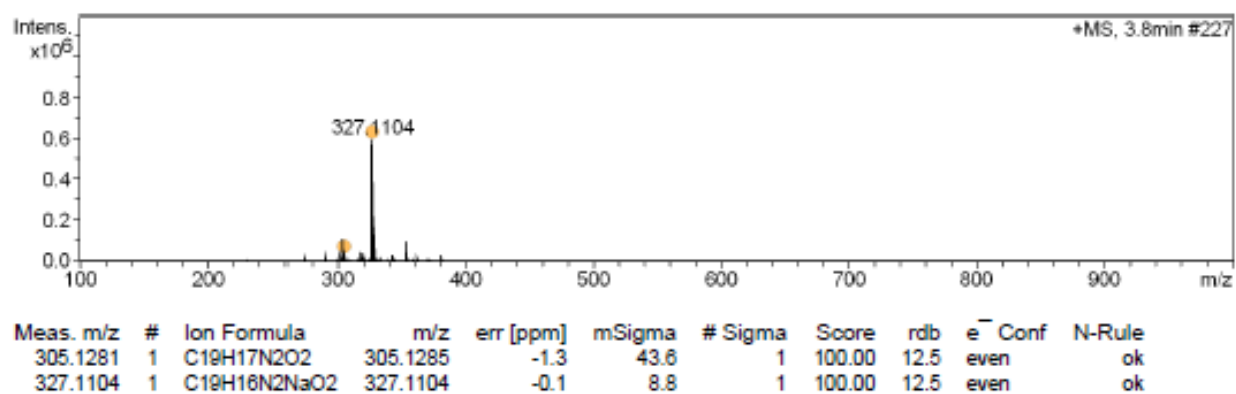

**Figure S106.** (2E)-1-(3-Methoxy-1-phenyl-1H-pyrazol-4-yl)-3-phenylprop-2-en-1-one (9a). HRMS (ESI-TOF).

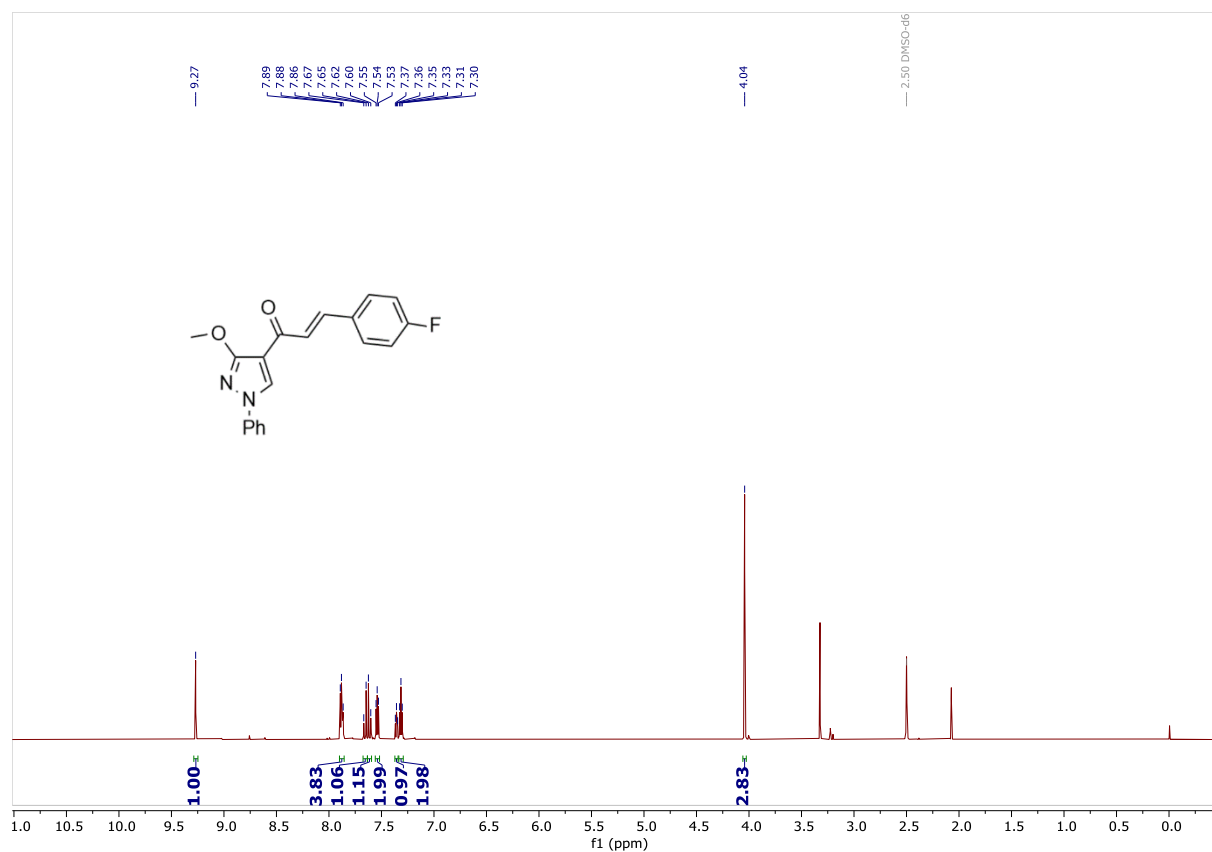

**Figure S107.** (2E)-3-(4-Fluorophenyl)-1-(3-methoxy-1-phenyl-1H-pyrazol-4-yl)prop-2-en-1-one (9b). <sup>1</sup>H NMR spectrum (700 MHz, DMSO-*d*<sub>6</sub>)

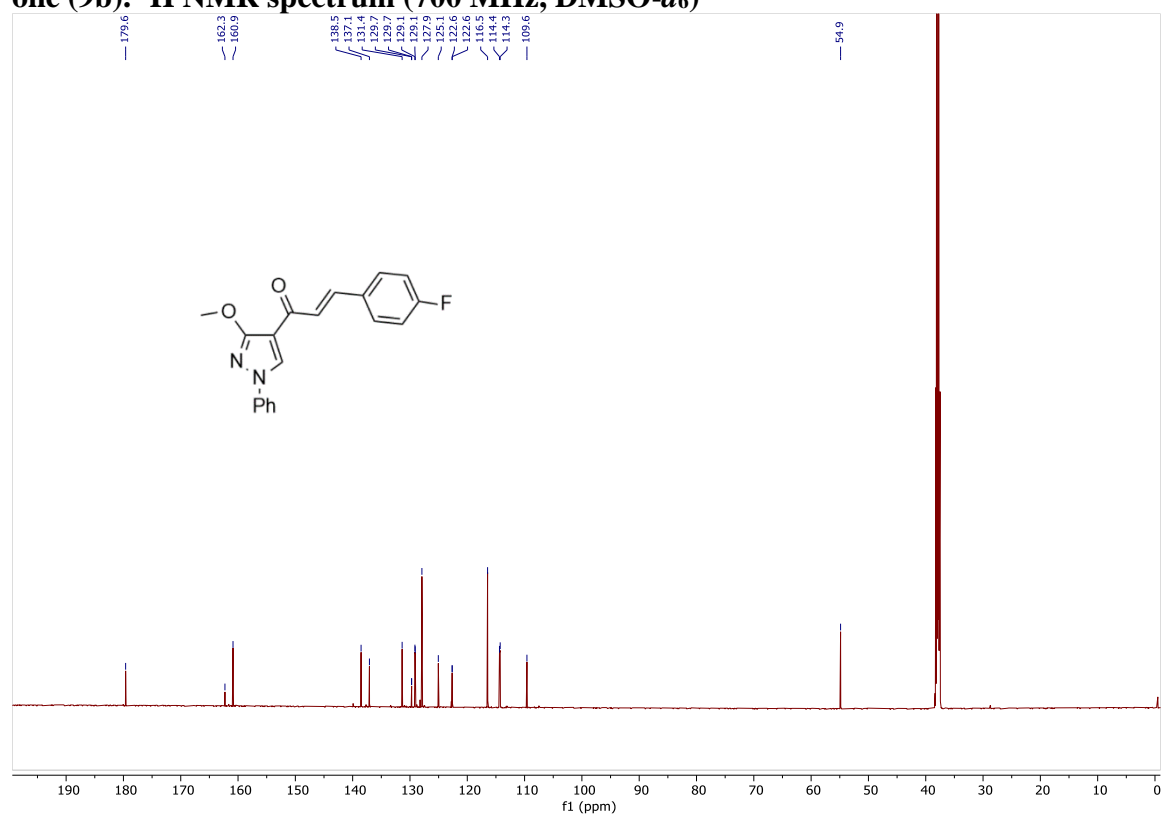

**Figure S108.** (2E)-3-(4-Fluorophenyl)-1-(3-methoxy-1-phenyl-1H-pyrazol-4-yl)prop-2-en-1-one (9b). <sup>13</sup>C NMR spectrum (176 MHz, DMSO-*d*<sub>6</sub>)

+MS, 5.5min #328

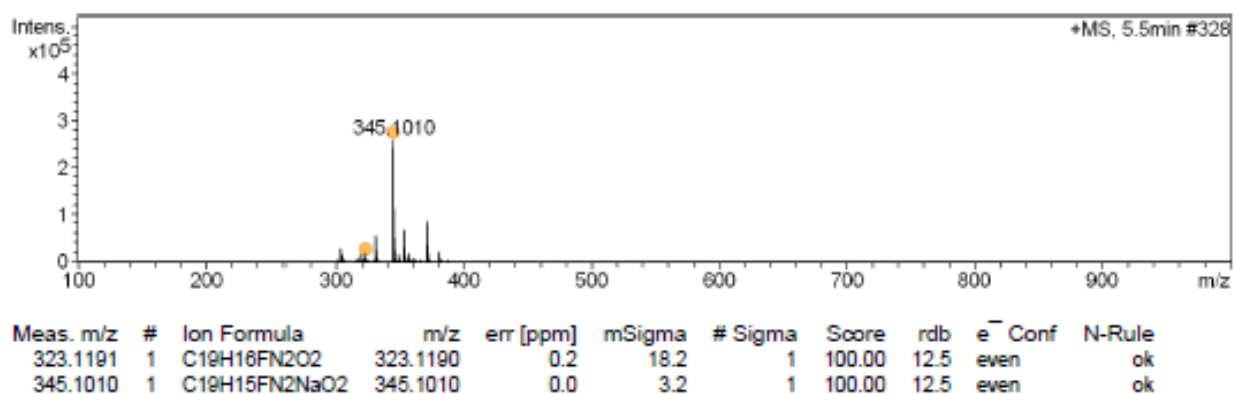

Figure S109. (2*E*)-3-(4-Fluorophenyl)-1-(3-methoxy-1-phenyl-1*H*-pyrazol-4-yl)prop-2-en-1-one (9b). HRMS (ESI-TOF).

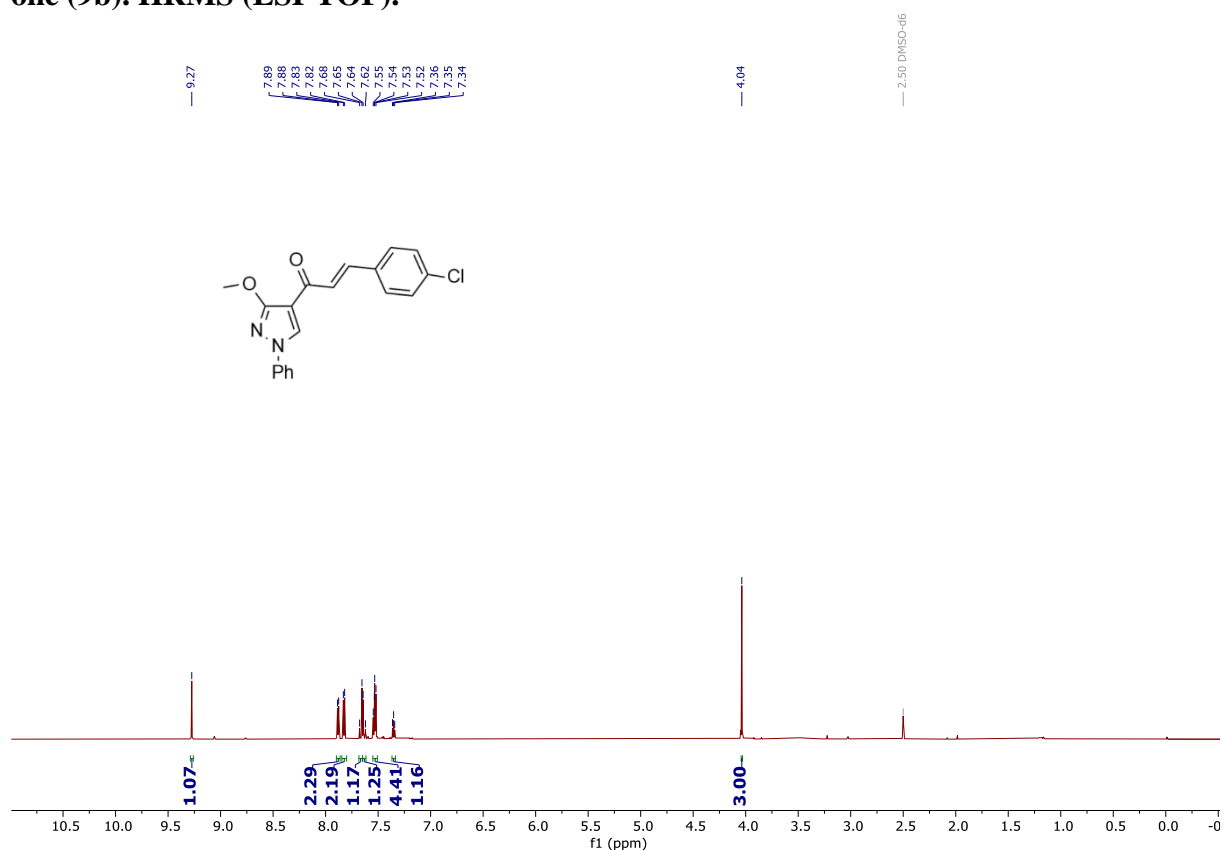

Figure S110. (2*E*)-3-(4-Chlorophenyl)-1-(3-methoxy-1-phenyl-1*H*-pyrazol-4-yl)prop-2-en-1-one (9c). <sup>1</sup>H NMR spectrum (700 MHz, DMSO-*d*<sub>6</sub>)

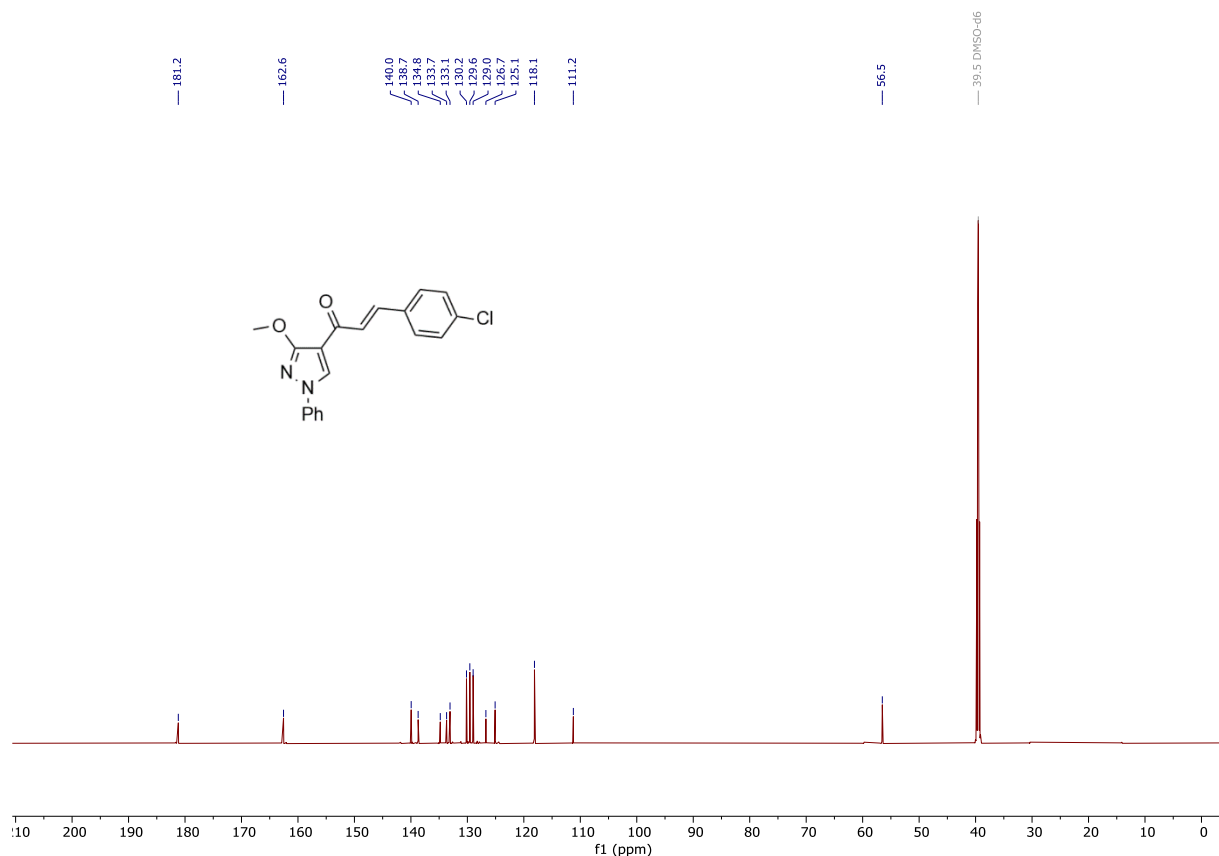

**Figure S111.** (2E)-3-(4-Chlorophenyl)-1-(3-methoxy-1-phenyl-1H-pyrazol-4-yl)prop-2-en-1-one (9c). <sup>13</sup>C NMR spectrum (176 MHz, DMSO-*d*<sub>6</sub>)

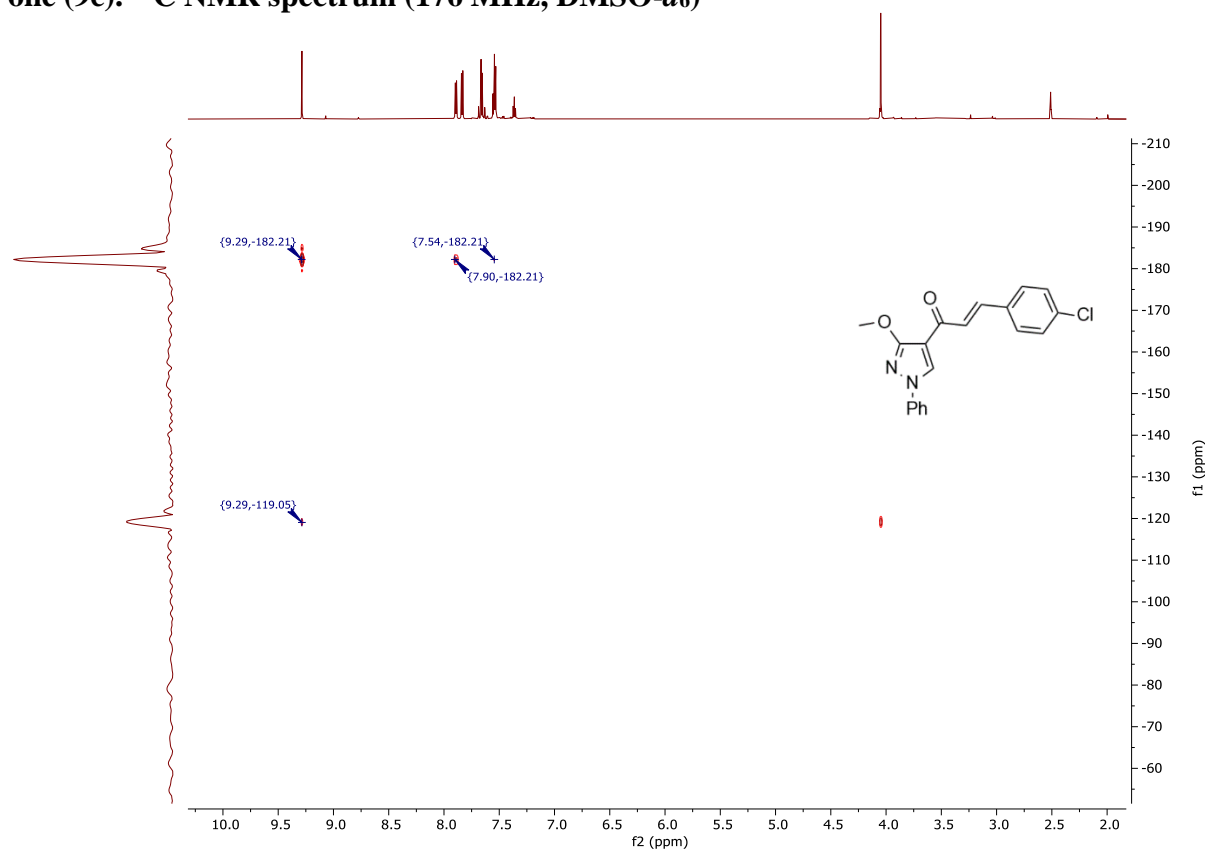

**Figure S112.** (2E)-3-(4-Chlorophenyl)-1-(3-methoxy-1-phenyl-1H-pyrazol-4-yl)prop-2-en-1-one (9c). <sup>1</sup>H-<sup>15</sup>N HMBC NMR spectrum (71 MHz, DMSO-*d*<sub>6</sub>)

+MS, 3.6min #215

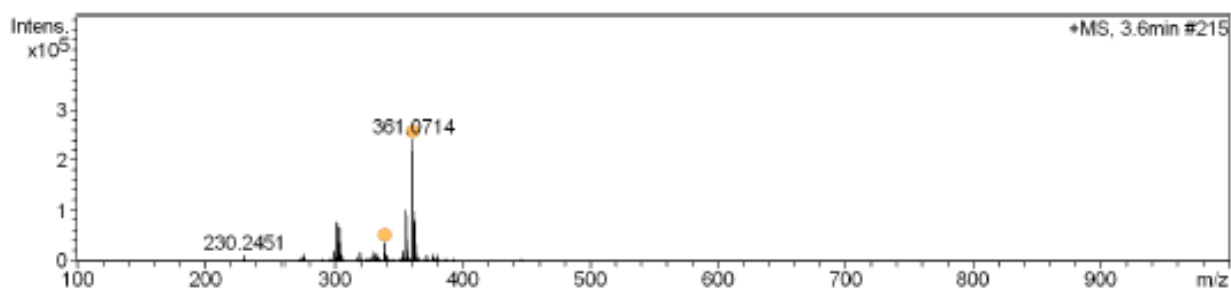

| Meas. m/z | # | Ion Formula    | m/z      | err [ppm] | mSigma | # Sigma | Score  | rdb  | e <sup>-</sup> | Conf | N-Rule |
|-----------|---|----------------|----------|-----------|--------|---------|--------|------|----------------|------|--------|
| 339.0892  | 1 | C19H16ClN2O2   | 339.0895 | -1.0      | 13.6   | 1       | 100.00 | 12.5 | even           |      | ok     |
| 361.0714  | 1 | C19H15ClN2NaO2 | 361.0714 | -0.0      | 6.3    | 1       | 100.00 | 12.5 | even           |      | ok     |

Figure S113. (2*E*)-3-(4-Chlorophenyl)-1-(3-methoxy-1-phenyl-1*H*-pyrazol-4-yl)prop-2-en-1-one (9c). HRMS (ESI-TOF).

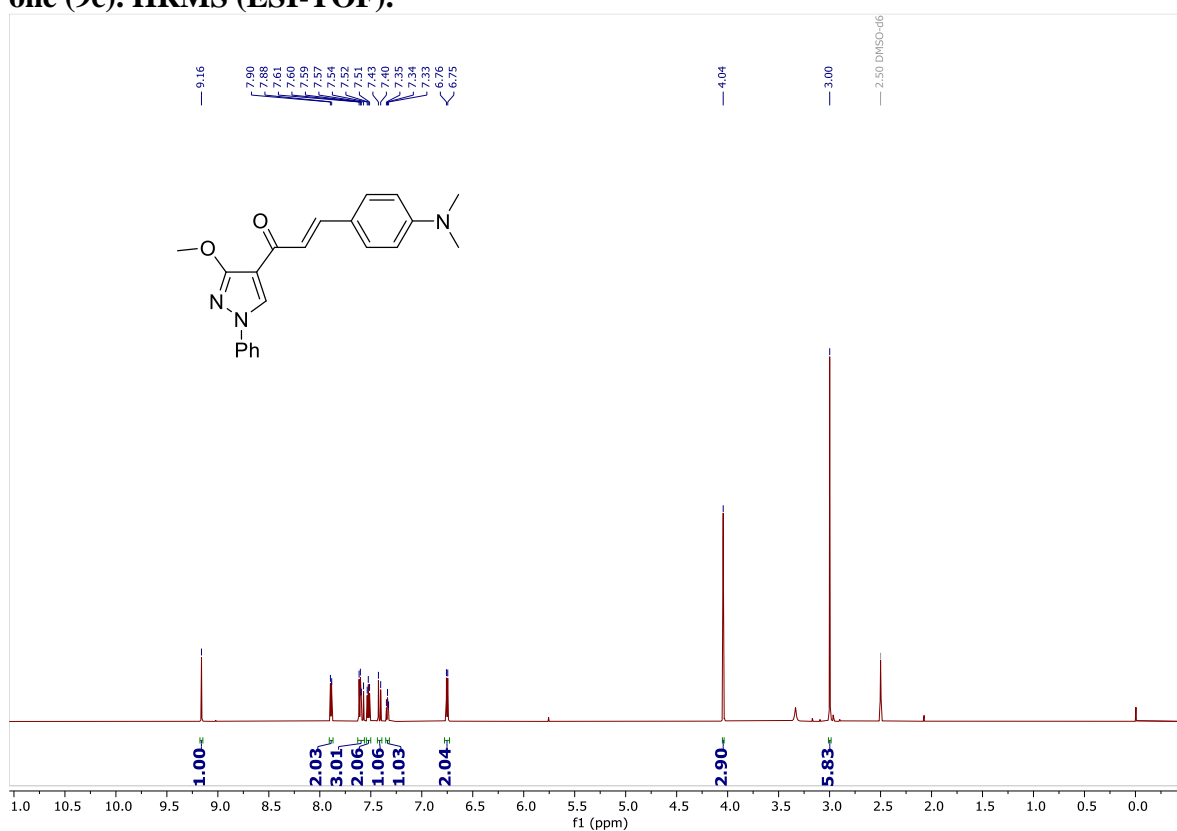

Figure S114. (2*E*)-3-[4-(Dimethylamino)phenyl]-1-(3-methoxy-1-phenyl-1*H*-pyrazol-4-yl)prop-2-en-1-one (9d). <sup>1</sup>H NMR spectrum (700 MHz, DMSO-*d*<sub>6</sub>)

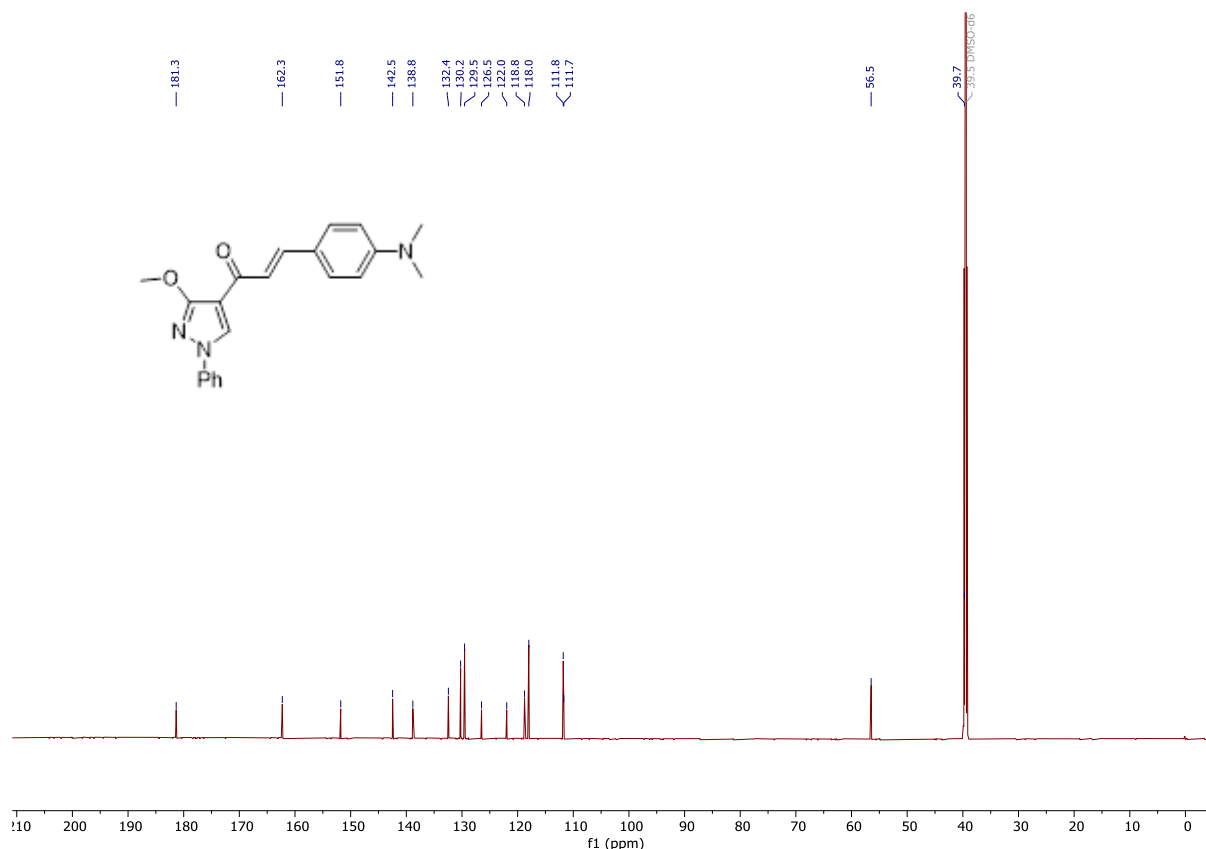

**Figure S115.** (2*E*)-3-[4-(Dimethylamino)phenyl]-1-(3-methoxy-1-phenyl-1*H*-pyrazol-4-yl)prop-2-en-1-one (9d). <sup>13</sup>C NMR spectrum (176 MHz, DMSO-*d*<sub>6</sub>)

**+MS, 5.6min #333**

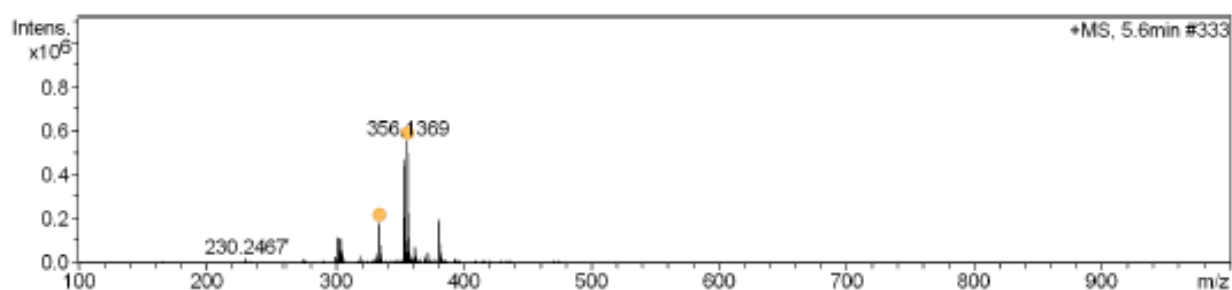

| Meas. <i>m/z</i> | # | Ion Formula                                                     | <i>m/z</i> | err [ppm] | <i>mSigma</i> | # Sigma | Score  | rdB  | e <sup>-</sup> Conf | N-Rule |
|------------------|---|-----------------------------------------------------------------|------------|-----------|---------------|---------|--------|------|---------------------|--------|
| 334.1541         | 1 | C <sub>20</sub> H <sub>20</sub> N <sub>3</sub> O <sub>2</sub>   | 334.1550   | -2.6      | 14.2          | 1       | 100.00 | 12.5 | even                | ok     |
| 356.1369         | 1 | C <sub>20</sub> H <sub>19</sub> N <sub>3</sub> NaO <sub>2</sub> | 356.1369   | -0.2      | 2.9           | 1       | 100.00 | 12.5 | even                | ok     |

**Figure S116.** (2*E*)-3-[4-(Dimethylamino)phenyl]-1-(3-methoxy-1-phenyl-1*H*-pyrazol-4-yl)prop-2-en-1-one (9d). HRMS (ESI-TOF).

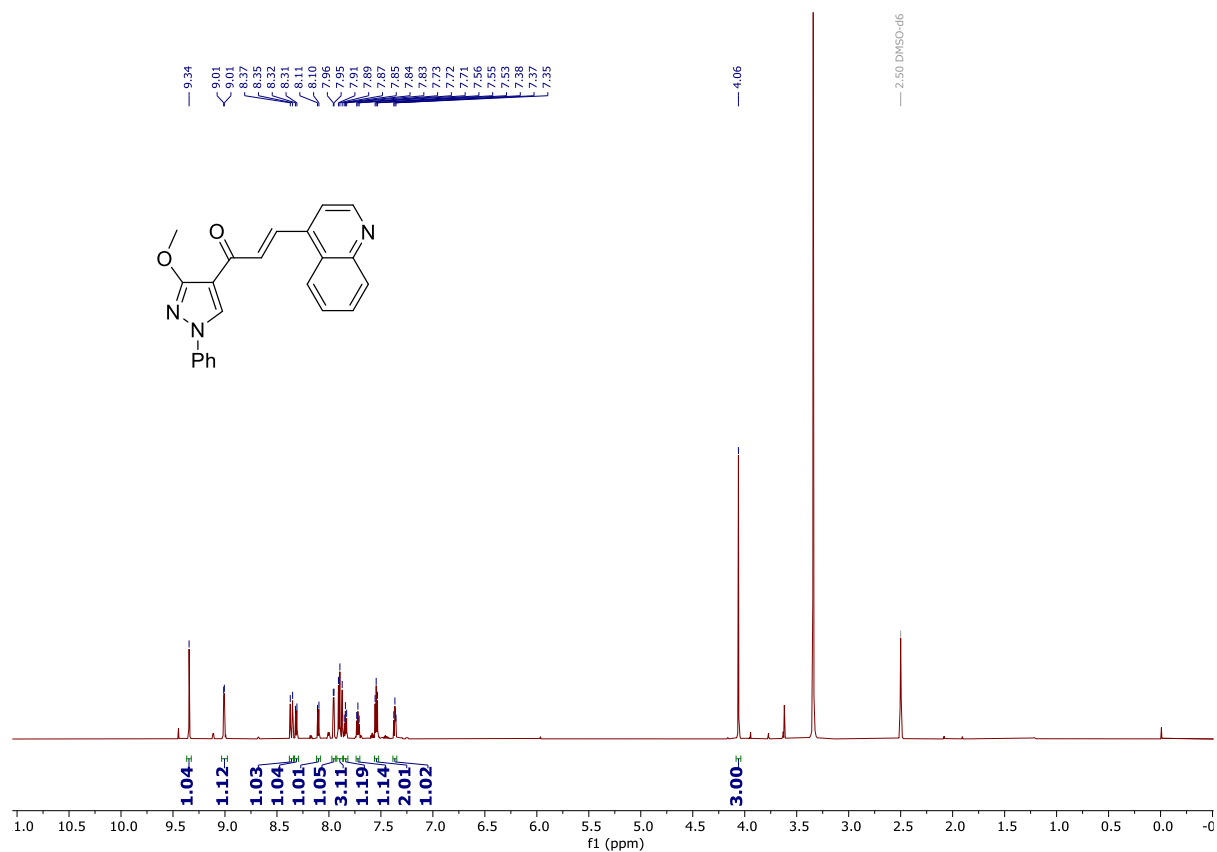

**Figure S117.** (2E)-1-(3-Methoxy-1-phenyl-1H-pyrazol-4-yl)-3-(quinolin-4-yl)prop-2-en-1-one (9e). <sup>1</sup>H NMR spectrum (700 MHz, DMSO-*d*<sub>6</sub>)

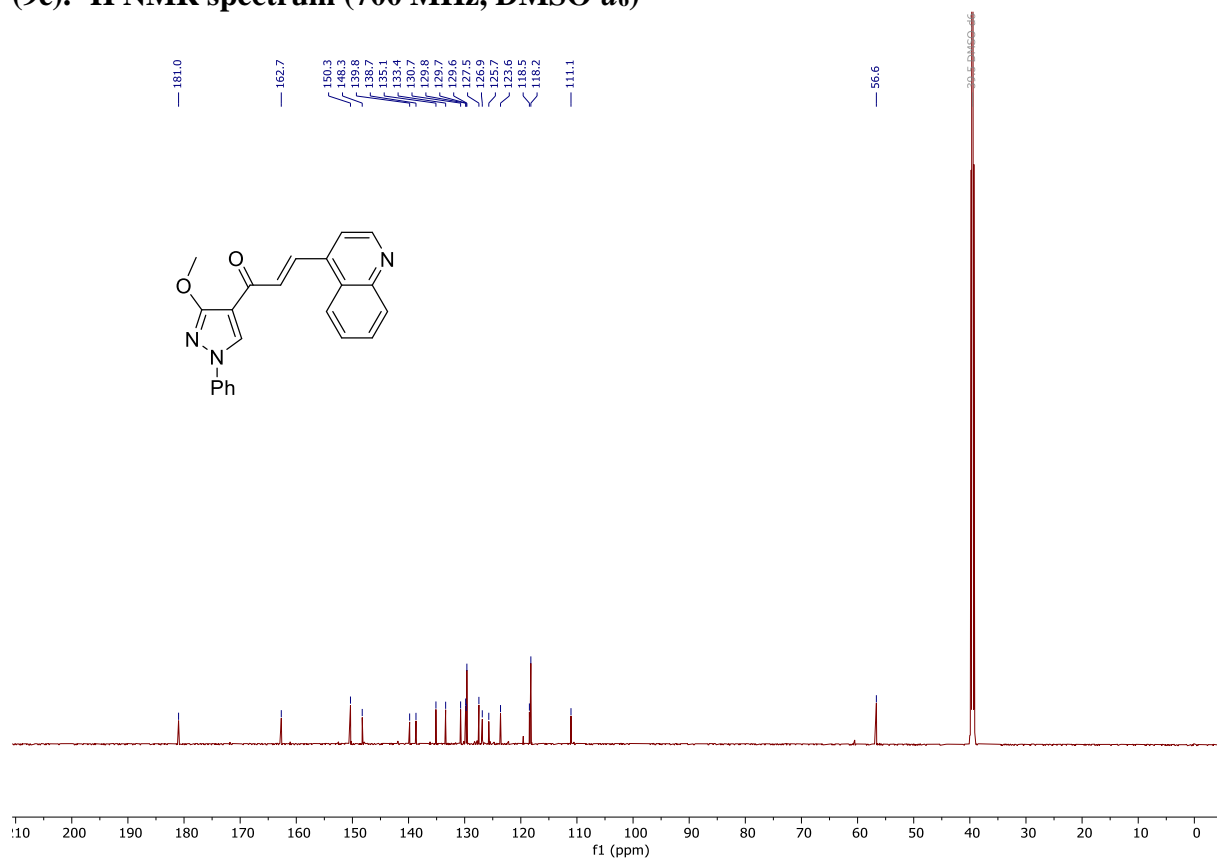

**Figure S118.** (2E)-1-(3-Methoxy-1-phenyl-1H-pyrazol-4-yl)-3-(quinolin-4-yl)prop-2-en-1-one (9e). <sup>13</sup>C NMR spectrum (176 MHz, DMSO-*d*<sub>6</sub>)



+MS, 5.8min #350

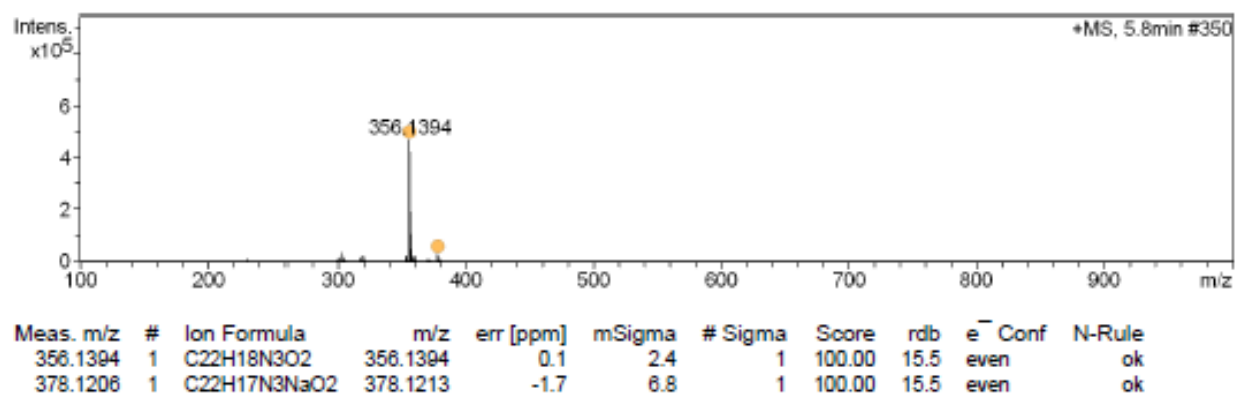

Figure S119. (2*E*)-1-(3-Methoxy-1-phenyl-1*H*-pyrazol-4-yl)-3-(quinolin-4-yl)prop-2-en-1-one (9e). HRMS (ESI-TOF).

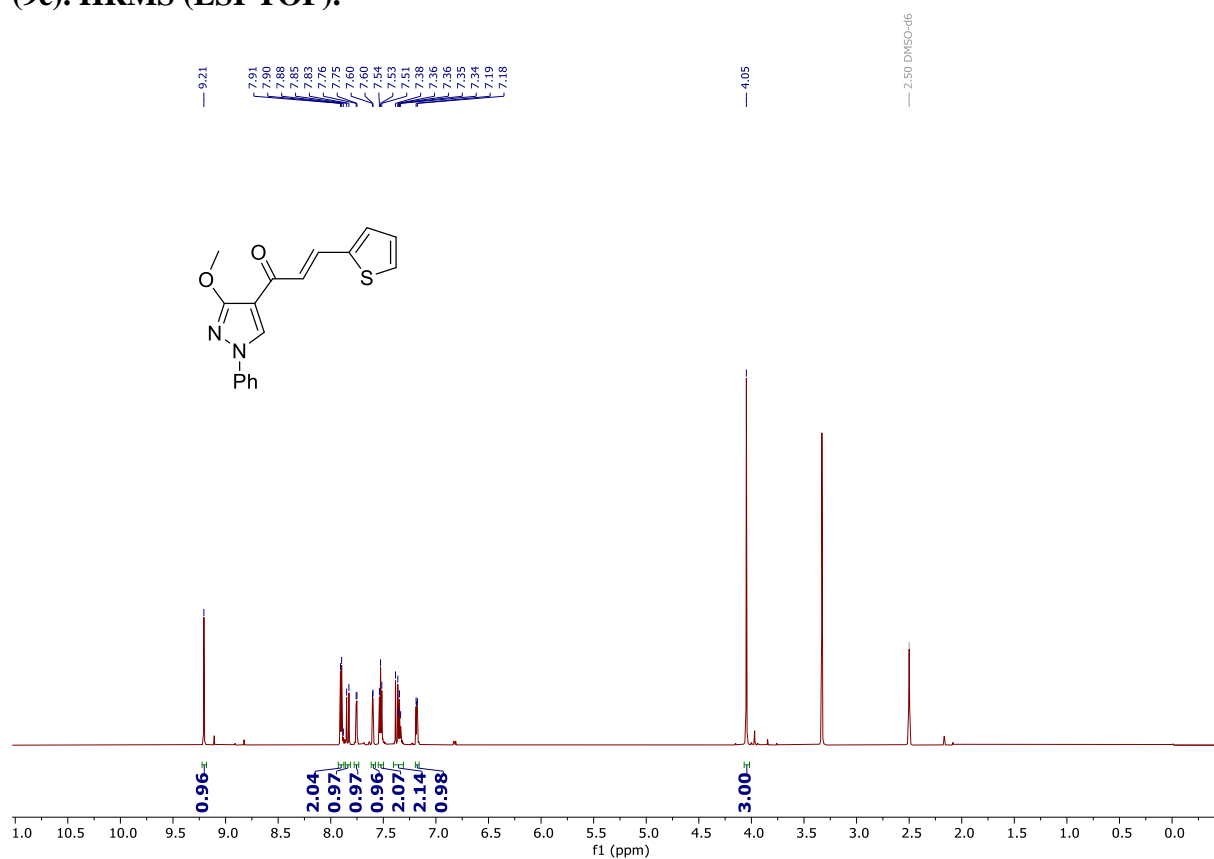

Figure S120. (2*E*)-1-(3-Methoxy-1-phenyl-1*H*-pyrazol-4-yl)-3-(thiophen-2-yl)prop-2-en-1-one (9f). <sup>1</sup>H NMR spectrum (700 MHz, DMSO-*d*<sub>6</sub>)

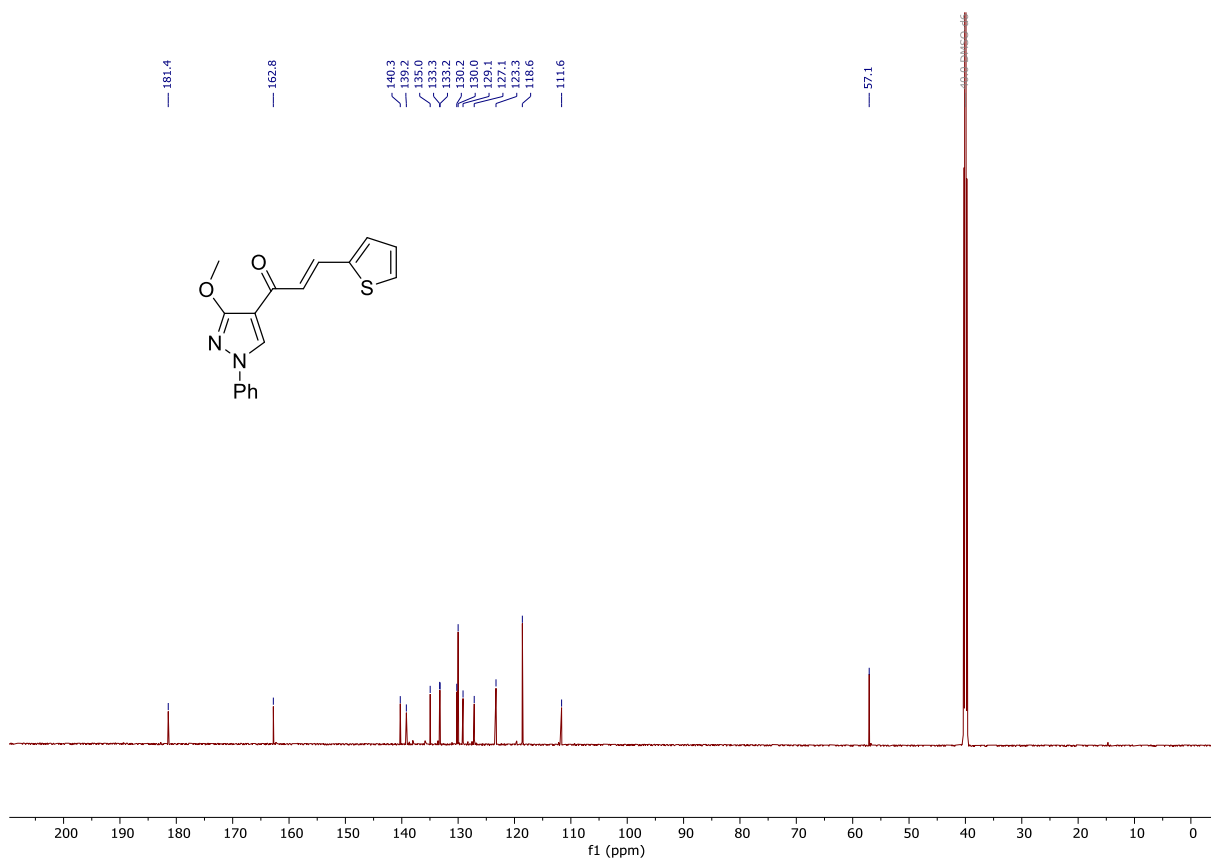

**Figure S121.** (2E)-1-(3-Methoxy-1-phenyl-1H-pyrazol-4-yl)-3-(thiophen-2-yl)prop-2-en-1-one (9f). <sup>13</sup>C NMR spectrum (176 MHz, DMSO-*d*<sub>6</sub>)

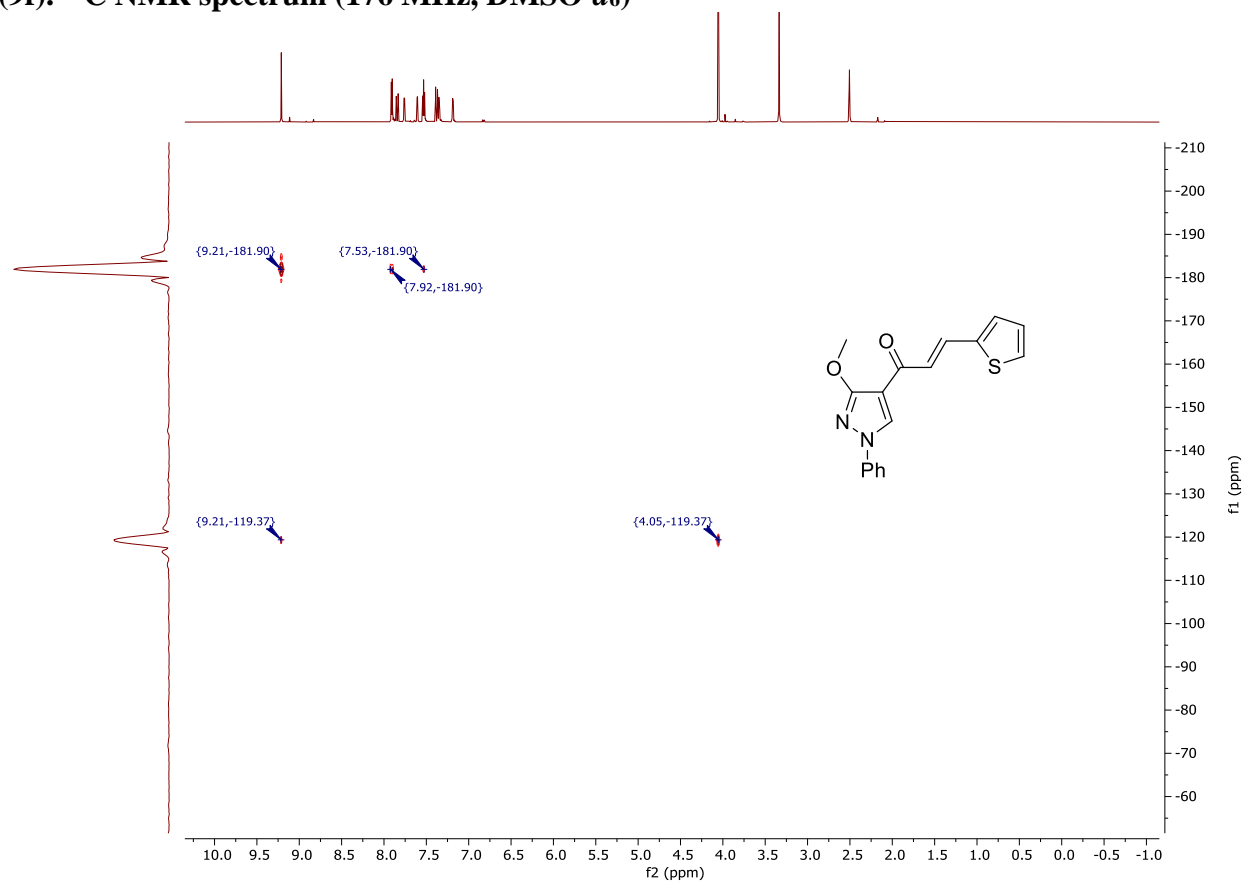

**Figure S122.** (2E)-1-(3-Methoxy-1-phenyl-1H-pyrazol-4-yl)-3-(thiophen-2-yl)prop-2-en-1-one (9f). <sup>1</sup>H-<sup>15</sup>N HMBC NMR spectrum (71 MHz, DMSO-*d*<sub>6</sub>)

+MS, 7.4min #444

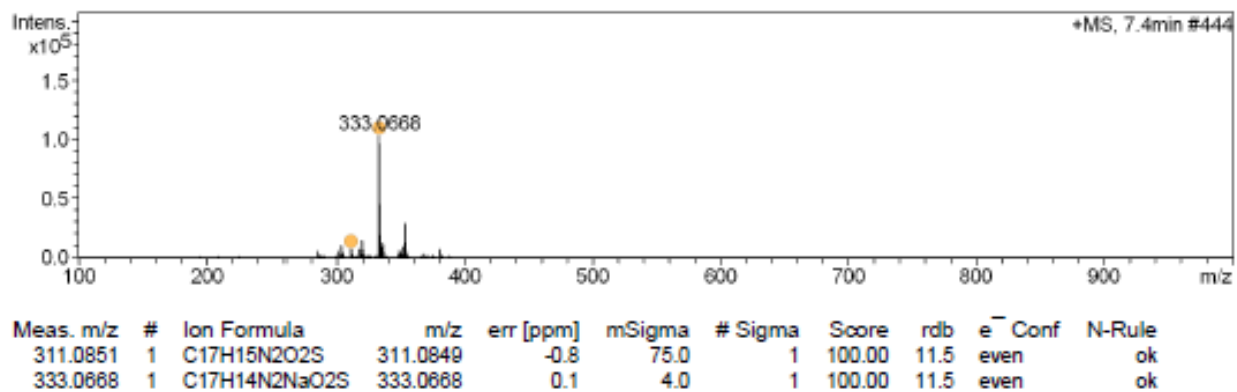

Figure S123. (2*E*)-1-(3-Methoxy-1-phenyl-1*H*-pyrazol-4-yl)-3-(thiophen-2-yl)prop-2-en-1-one (9f). HRMS (ESI-TOF).

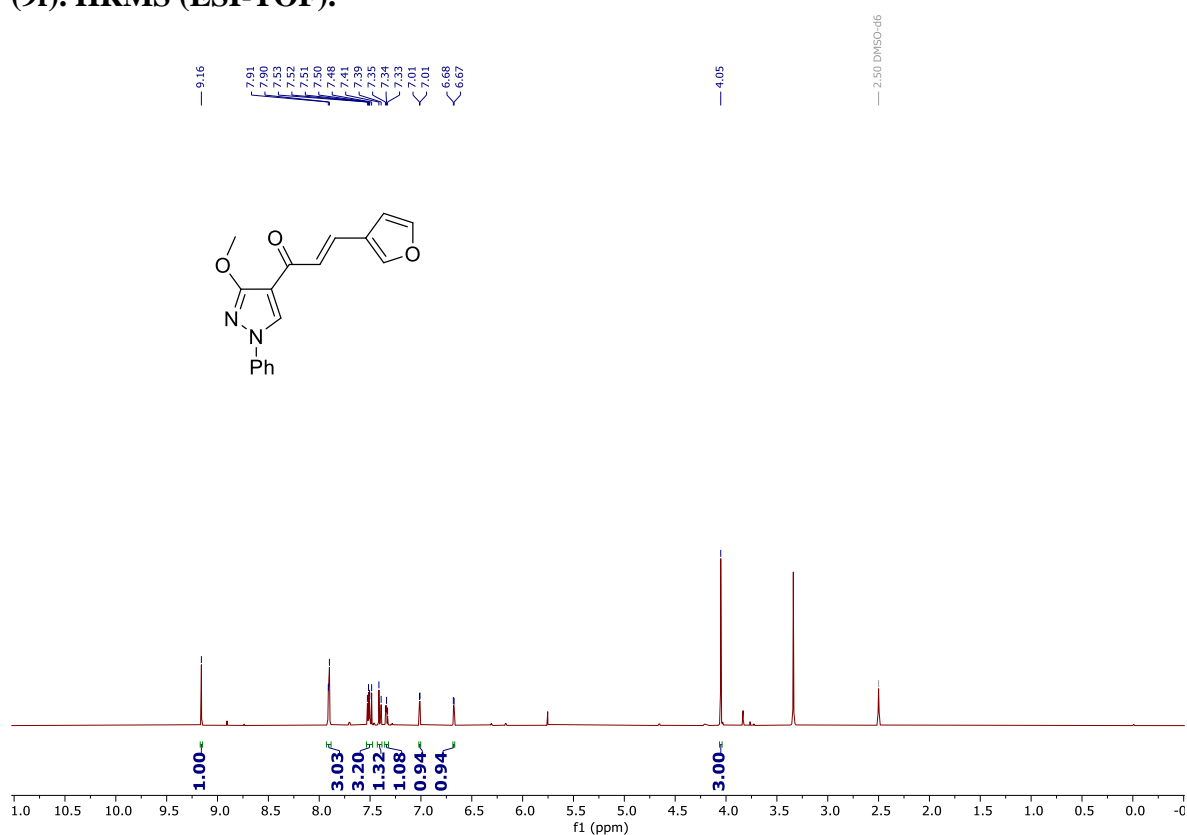

Figure S124. (2*E*)-3-(Furan-3-yl)-1-(3-methoxy-1-phenyl-1*H*-pyrazol-4-yl)prop-2-en-1-one (9g). <sup>1</sup>H NMR spectrum (700 MHz, DMSO-*d*<sub>6</sub>):

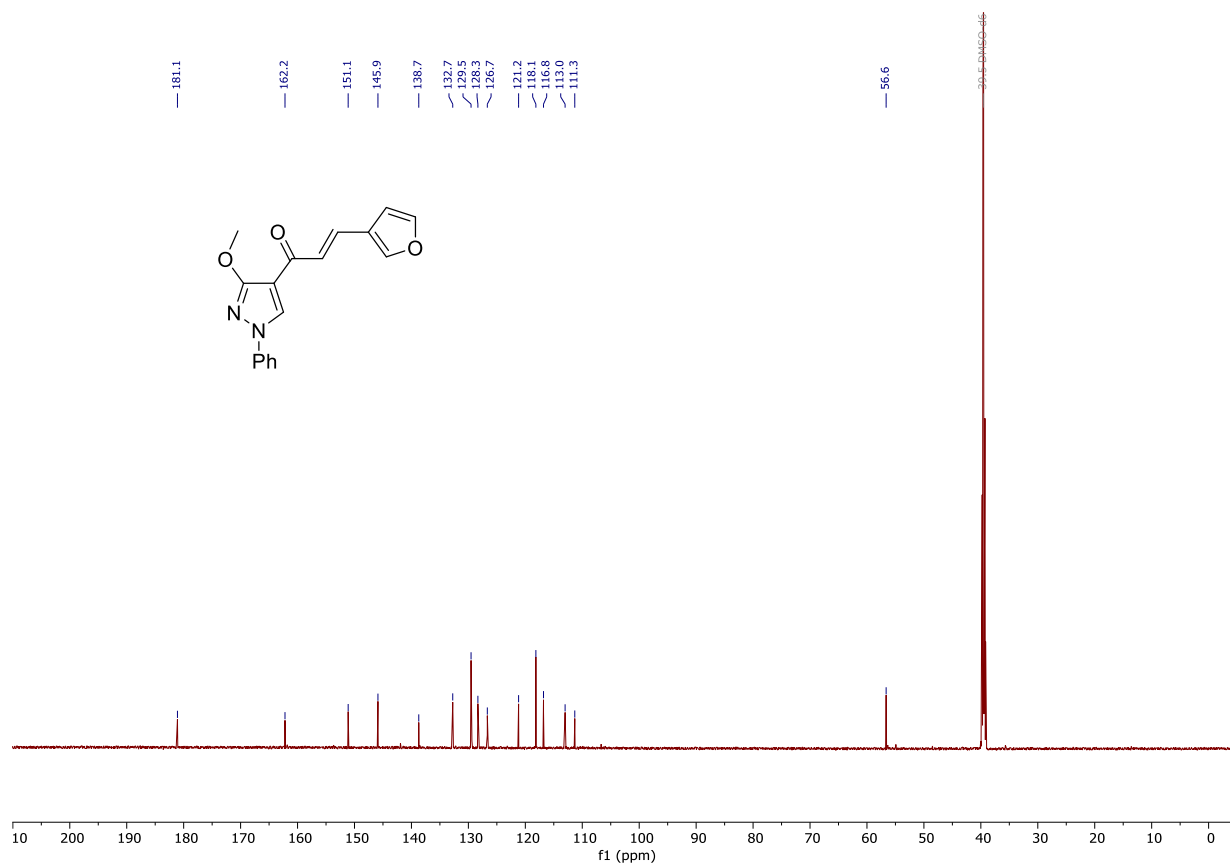

**Figure S125.** (2E)-3-(Furan-3-yl)-1-(3-methoxy-1-phenyl-1H-pyrazol-4-yl)prop-2-en-1-one (9g). <sup>13</sup>C NMR spectrum (176 MHz, DMSO-*d*<sub>6</sub>)

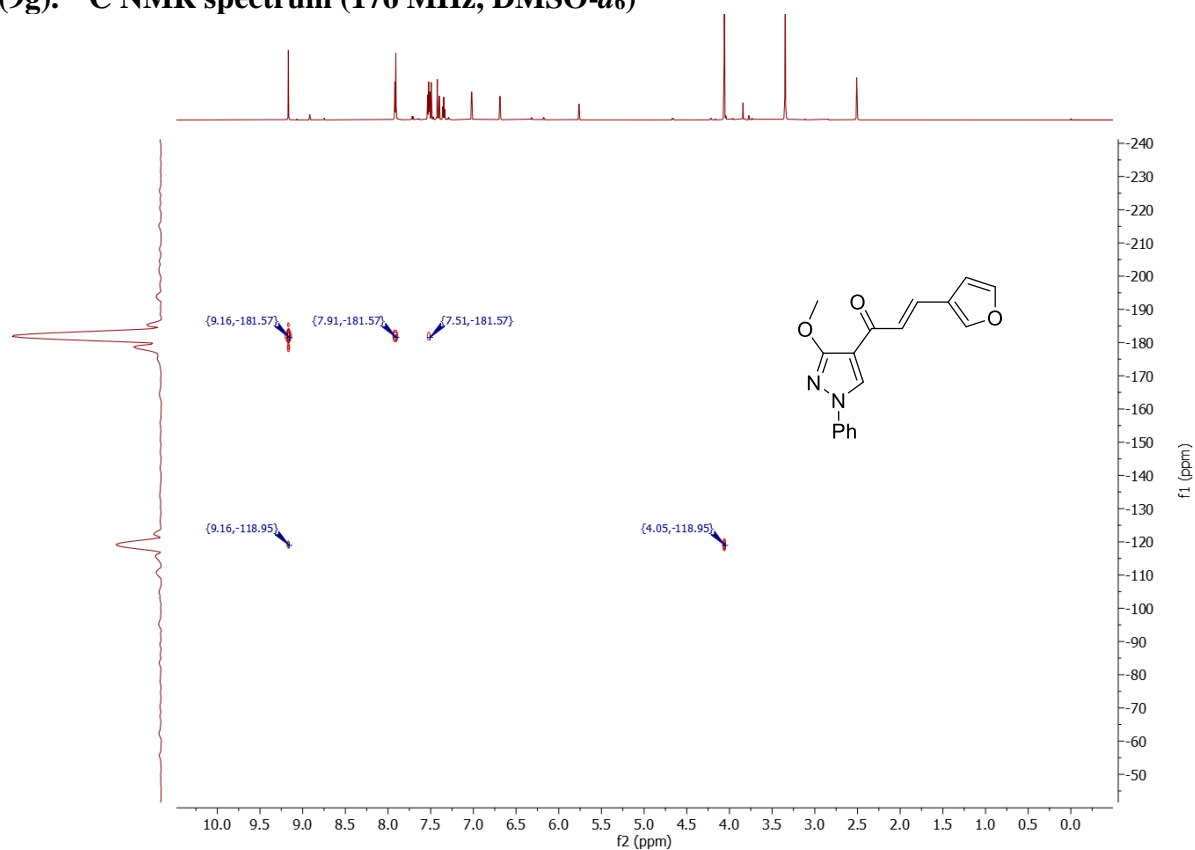

**Figure S126.** (2E)-3-(Furan-3-yl)-1-(3-methoxy-1-phenyl-1H-pyrazol-4-yl)prop-2-en-1-one (9g). <sup>1</sup>H-<sup>15</sup>N HMBC NMR spectrum (71 MHz, DMSO-*d*<sub>6</sub>)

+MS, 6.6min #398

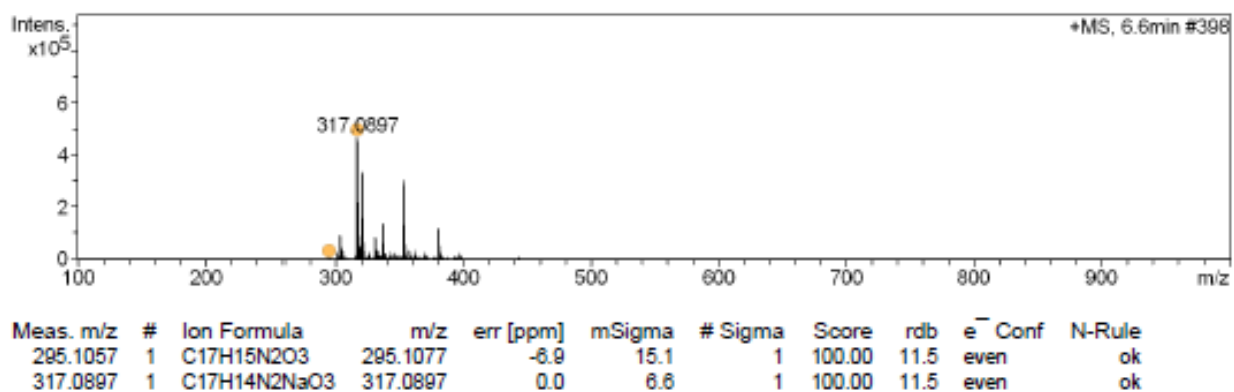

Figure S127. (2*E*)-3-(Furan-3-yl)-1-(3-methoxy-1-phenyl-1*H*-pyrazol-4-yl)prop-2-en-1-one (9g). HRMS (ESI-TOF).

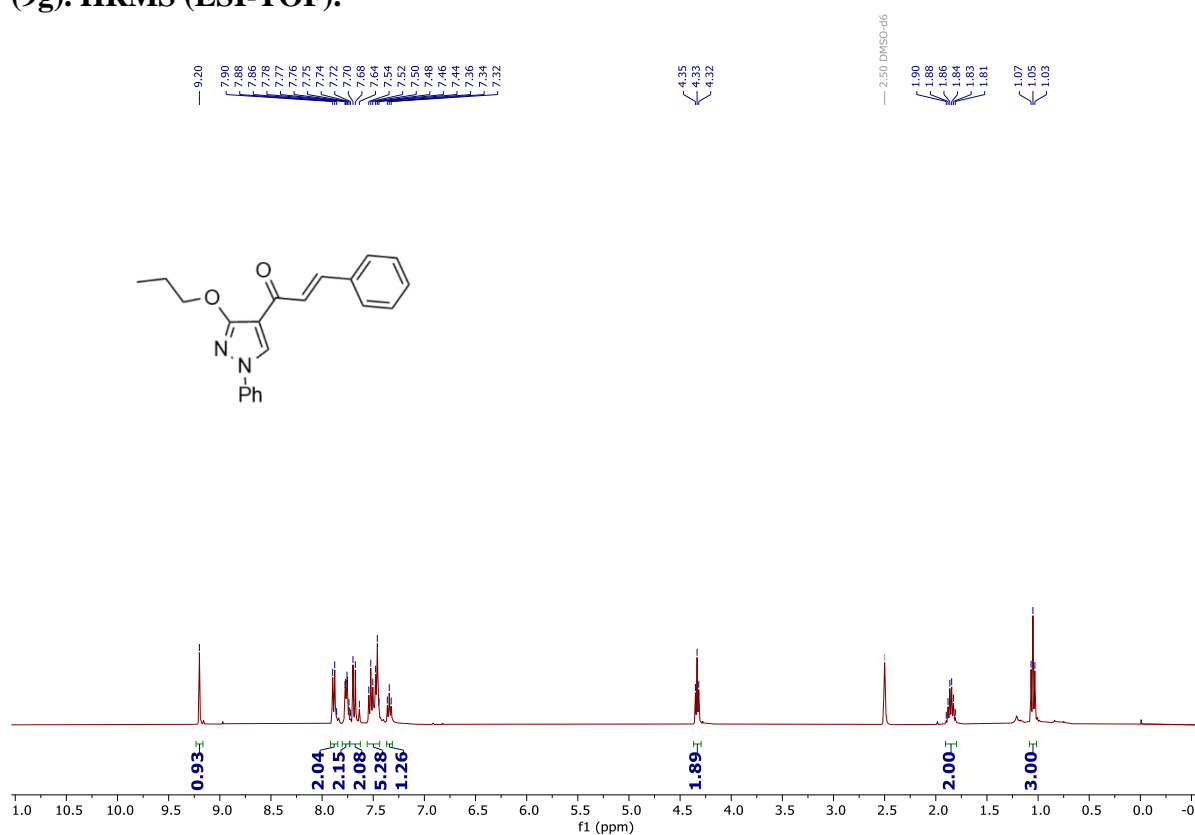

Figure S128. (2*E*)-3-Phenyl-1-(1-phenyl-3-propoxy-1*H*-pyrazol-4-yl)prop-2-en-1-one (9h). <sup>1</sup>H NMR spectrum (400 MHz, DMSO-*d*<sub>6</sub>)

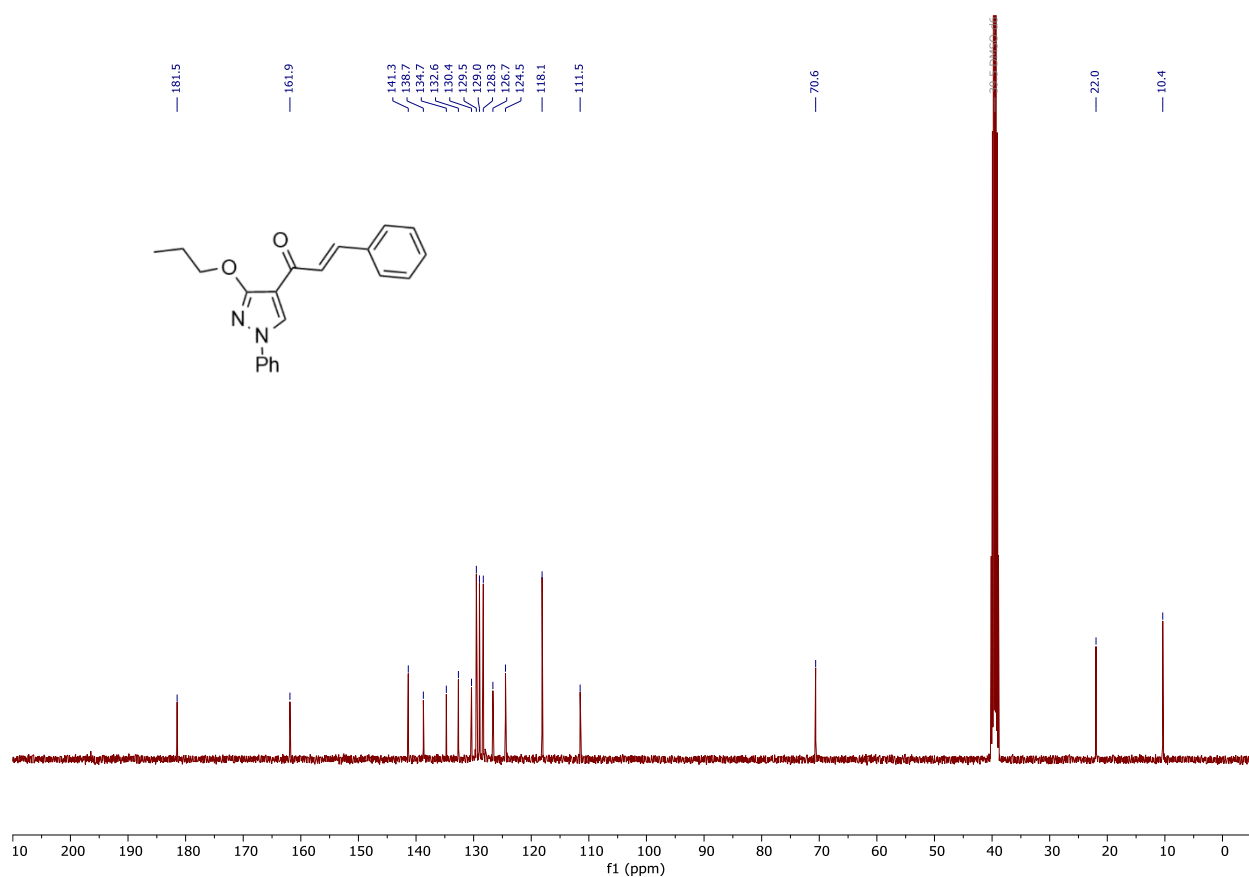

Figure S129. (2E)-3-Phenyl-1-(1-phenyl-3-propoxy-1H-pyrazol-4-yl)prop-2-en-1-one (9h). <sup>13</sup>C NMR spectrum (101 MHz, DMSO-*d*<sub>6</sub>)

+MS, 11.8min #708

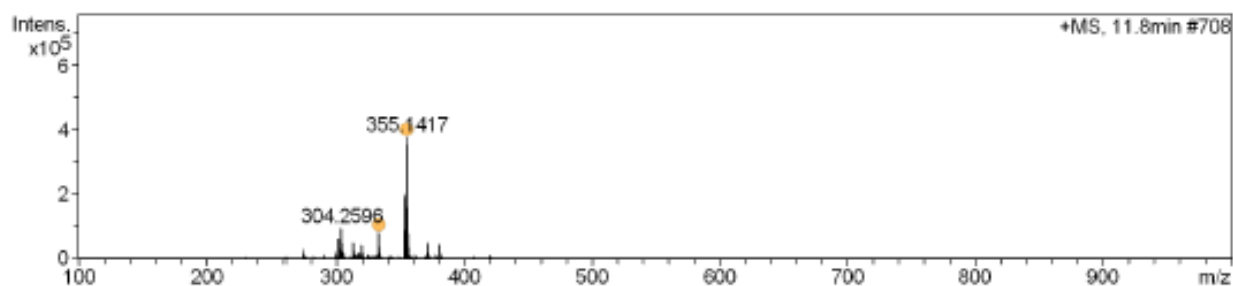

| Meas. m/z | # | Ion Formula                                                     | m/z      | err [ppm] | mSigma | # Sigma | Score  | rdB  | e <sup>-</sup> Conf | N-Rule |
|-----------|---|-----------------------------------------------------------------|----------|-----------|--------|---------|--------|------|---------------------|--------|
| 333.1591  | 1 | C <sub>21</sub> H <sub>21</sub> N <sub>2</sub> O <sub>2</sub>   | 333.1598 | -2.0      | 4.0    | 1       | 100.00 | 12.5 | even                | ok     |
| 355.1417  | 1 | C <sub>21</sub> H <sub>20</sub> N <sub>2</sub> NaO <sub>2</sub> | 355.1417 | -0.0      | 1.8    | 1       | 100.00 | 12.5 | even                | ok     |

Figure S130. (2E)-3-Phenyl-1-(1-phenyl-3-propoxy-1H-pyrazol-4-yl)prop-2-en-1-one (9h). HRMS (ESI-TOF).

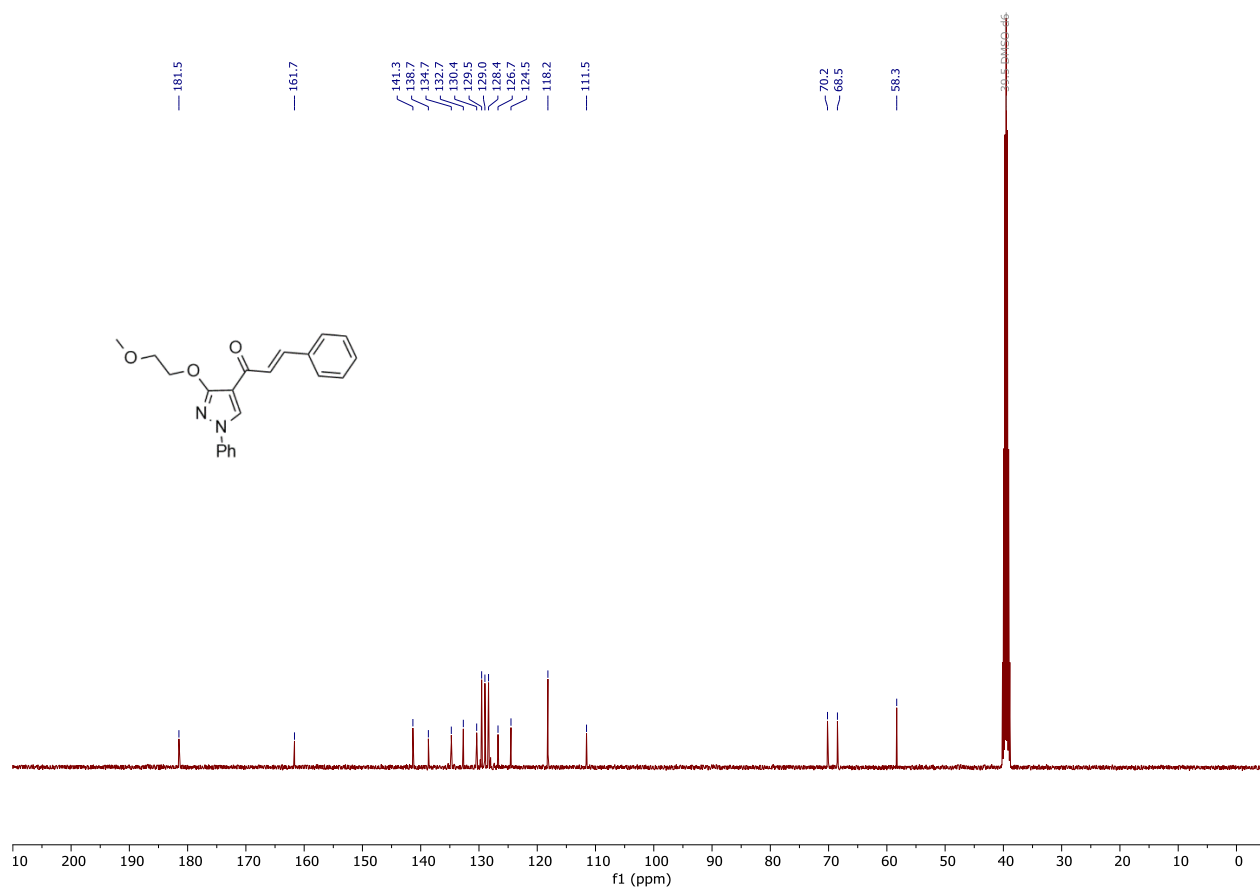

**Figure S131.** (E)-1-[3-(2-Methoxyethoxy)-1-phenyl-1H-pyrazol-4-yl]-3-phenylprop-2-en-1-one (9i). <sup>1</sup>H NMR spectrum (400 MHz, DMSO-*d*<sub>6</sub>)

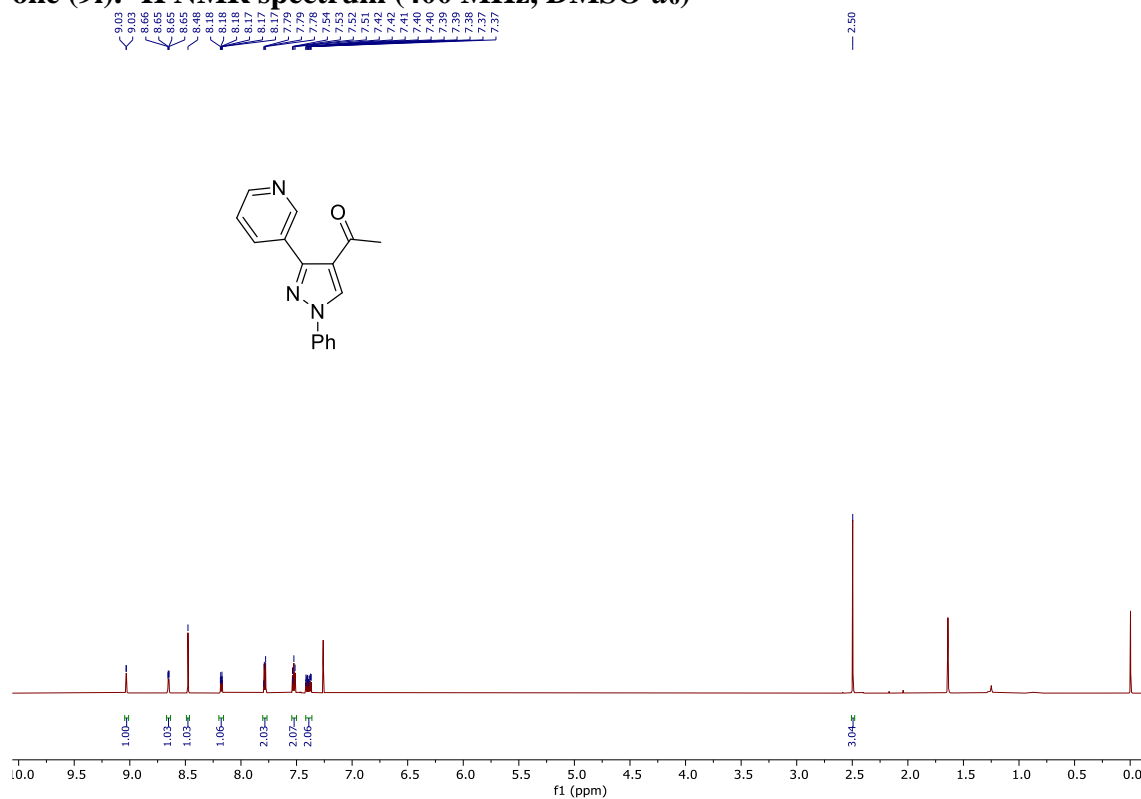

**Figure S132.** (E)-1-[3-(2-Methoxyethoxy)-1-phenyl-1H-pyrazol-4-yl]-3-phenylprop-2-en-1-one (9i). <sup>13</sup>C NMR spectrum (101 MHz, DMSO-*d*<sub>6</sub>)

+MS, 4.3min #259

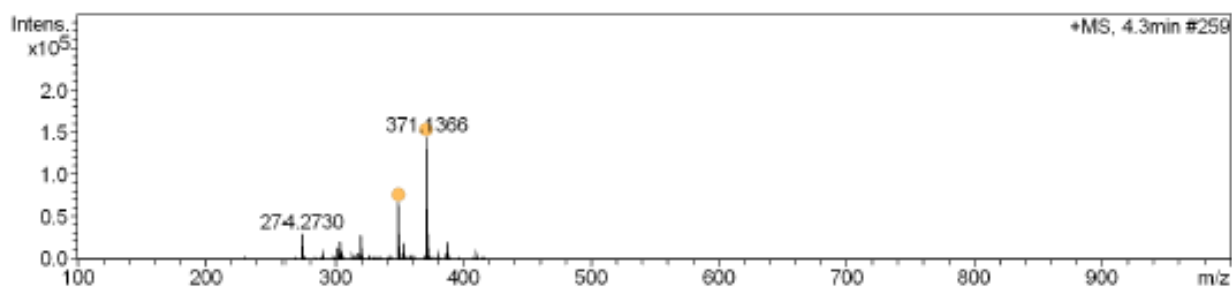

| Meas. m/z | # | Ion Formula                                                     | m/z      | err [ppm] | mSigma | # Sigma | Score  | rdB  | e <sup>-</sup> Conf | N-Rule |
|-----------|---|-----------------------------------------------------------------|----------|-----------|--------|---------|--------|------|---------------------|--------|
| 349.1550  | 1 | C <sub>21</sub> H <sub>21</sub> N <sub>2</sub> O <sub>3</sub>   | 349.1547 | 0.9       | 0.8    | 1       | 100.00 | 12.5 | even                | ok     |
| 371.1368  | 1 | C <sub>21</sub> H <sub>20</sub> N <sub>2</sub> NaO <sub>3</sub> | 371.1366 | -0.1      | 5.0    | 1       | 100.00 | 12.5 | even                | ok     |

Figure S133. (2*E*)-1-[3-(2-Methoxyethoxy)-1-phenyl-1*H*-pyrazol-4-yl]-3-phenylprop-2-en-1-one (9i). HRMS (ESI-TOF).

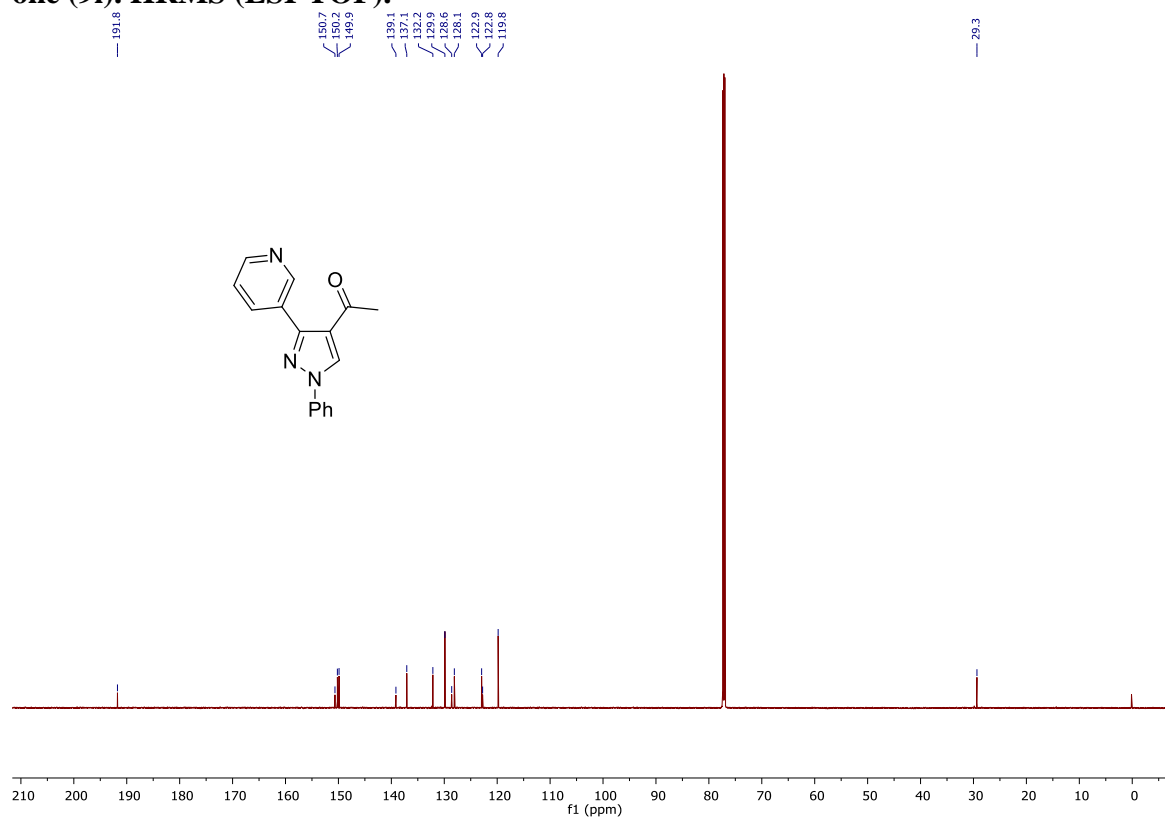

Figure S134. 1-[1-Phenyl-3-(pyridin-3-yl)-1*H*-pyrazol-4-yl]ethan-1-one (11a). <sup>13</sup>C NMR spectrum (176 MHz, CDCl<sub>3</sub>)



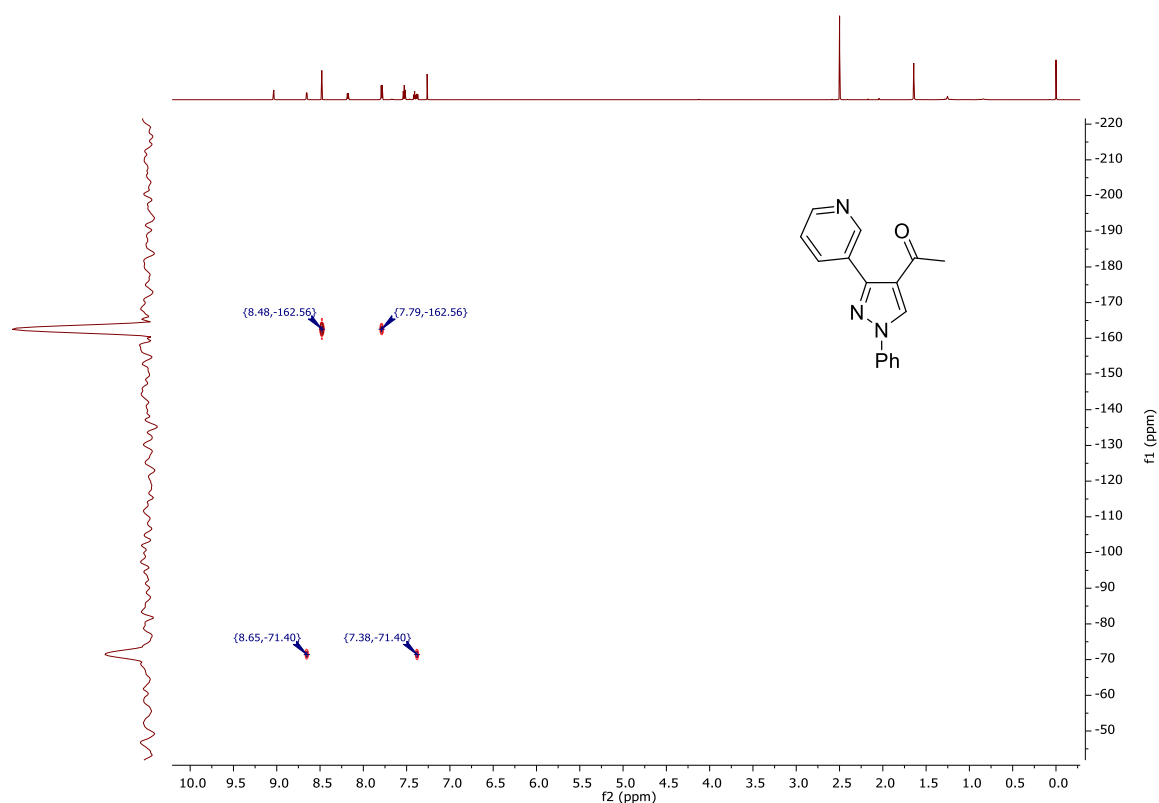

**Figure S135.** 1-[1-Phenyl-3-(pyridin-3-yl)-1*H*-pyrazol-4-yl]ethan-1-one (11a).  $^1\text{H}$ - $^{15}\text{N}$  HMBC NMR spectrum (71 MHz,  $\text{CDCl}_3$ )

**+MS, 2.5min #151**

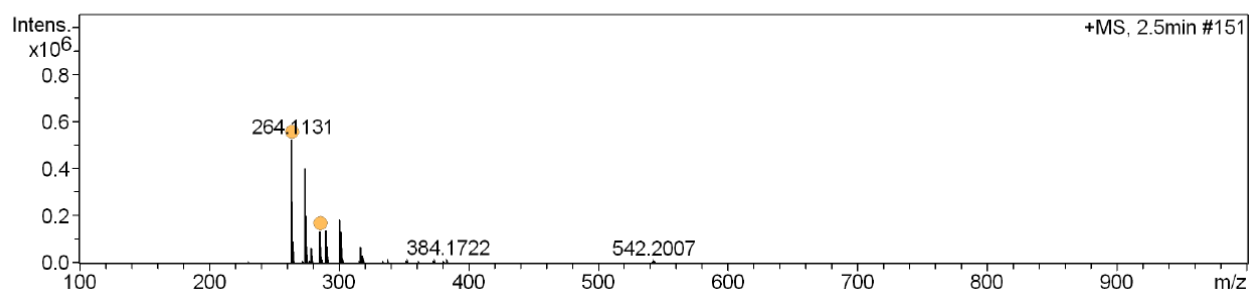

| Meas. m/z | # | Ion Formula                                        | m/z      | err [ppm] | mSigma | # Sigma | Score  | rdb  | e <sup>-</sup> | Conf | N-Rule |
|-----------|---|----------------------------------------------------|----------|-----------|--------|---------|--------|------|----------------|------|--------|
| 264.1131  | 1 | C <sub>16</sub> H <sub>14</sub> N <sub>3</sub> O   | 264.1131 | -0.2      | 0.5    | 1       | 100.00 | 11.5 | even           |      | ok     |
| 286.0948  | 1 | C <sub>16</sub> H <sub>13</sub> N <sub>3</sub> NaO | 286.0951 | 1.1       | 4.2    | 1       | 100.00 | 11.5 | even           |      | ok     |

**Figure S136.** 1-[1-Phenyl-3-(pyridin-3-yl)-1*H*-pyrazol-4-yl]ethan-1-one (11a). HRMS (ESI-TOF).

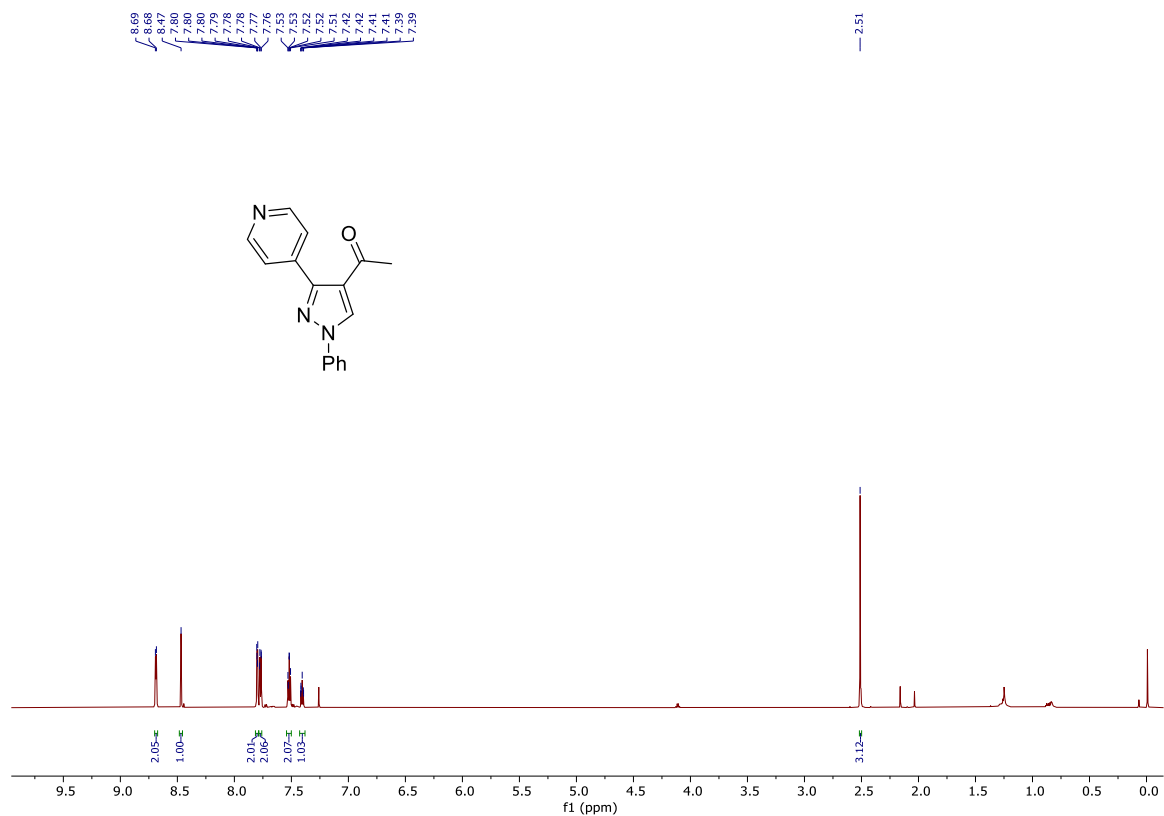

**Figure S137. 1-[1-Phenyl-3-(pyridin-4-yl)-1H-pyrazol-4-yl]ethan-1-one (11b). <sup>1</sup>H NMR spectrum (700 MHz, CDCl<sub>3</sub>)**

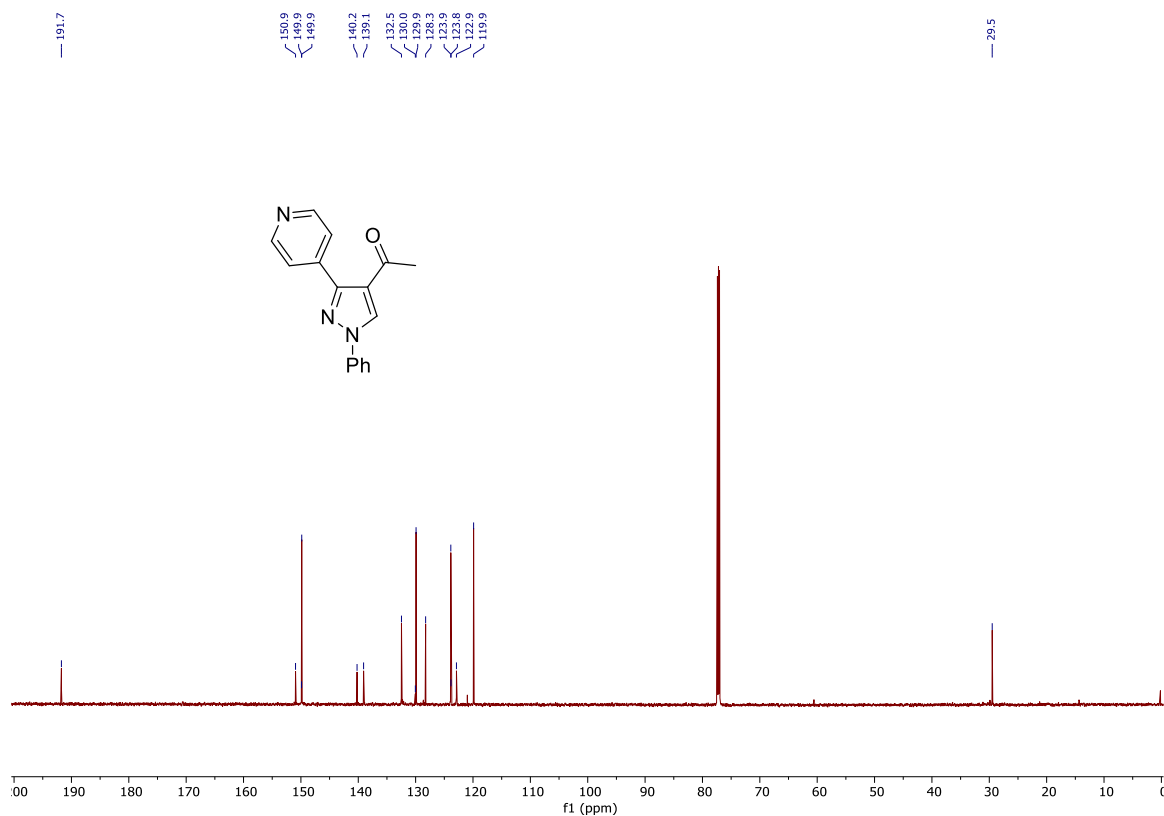

**Figure S138. 1-[1-Phenyl-3-(pyridin-4-yl)-1H-pyrazol-4-yl]ethan-1-one (11b). <sup>13</sup>C NMR spectrum (176 MHz, CDCl<sub>3</sub>)**

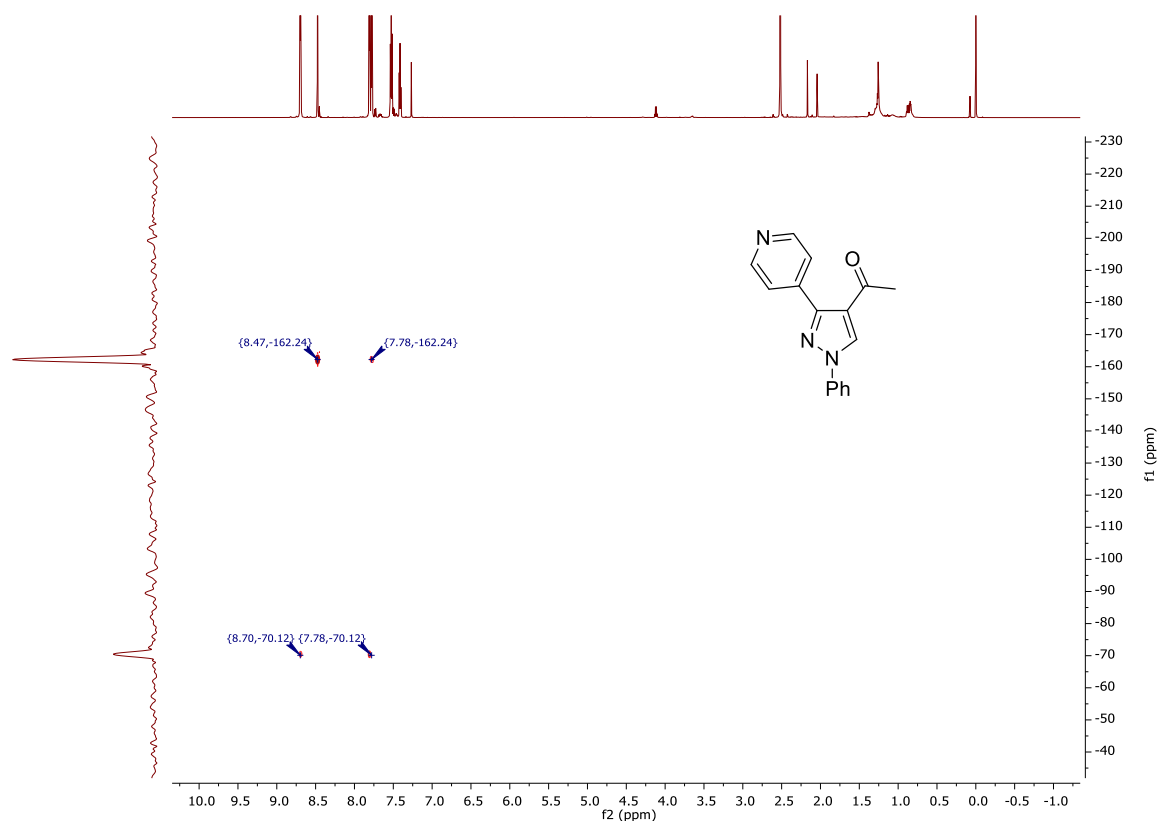

**Figure S139.** 1-[1-Phenyl-3-(pyridin-4-yl)-1*H*-pyrazol-4-yl]ethan-1-one (11b).  $^1\text{H}$ - $^{15}\text{N}$  HMBC NMR spectrum (71 MHz,  $\text{CDCl}_3$ )

**+MS, 4.3min #255**

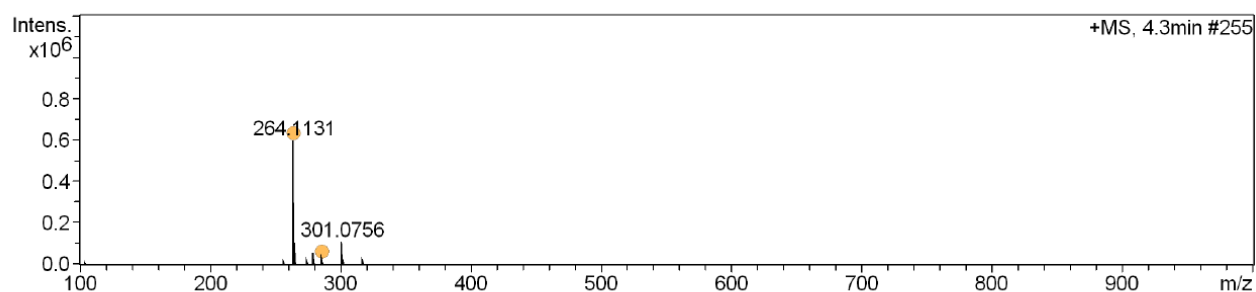

| Meas. m/z | # | Ion Formula                                        | m/z      | err [ppm] | mSigma | # Sigma | Score  | rdb  | e <sup>-</sup> Conf | N-Rule |
|-----------|---|----------------------------------------------------|----------|-----------|--------|---------|--------|------|---------------------|--------|
| 264.1131  | 1 | C <sub>16</sub> H <sub>14</sub> N <sub>3</sub> O   | 264.1131 | -0.3      | 3.0    | 1       | 100.00 | 11.5 | even                | ok     |
| 286.0951  | 1 | C <sub>16</sub> H <sub>13</sub> N <sub>3</sub> NaO | 286.0951 | 0.0       | 10.7   | 1       | 100.00 | 11.5 | even                | ok     |

**Figure S140.** 1-[1-Phenyl-3-(pyridin-4-yl)-1*H*-pyrazol-4-yl]ethan-1-one (11b). HRMS (ESI-TOF).

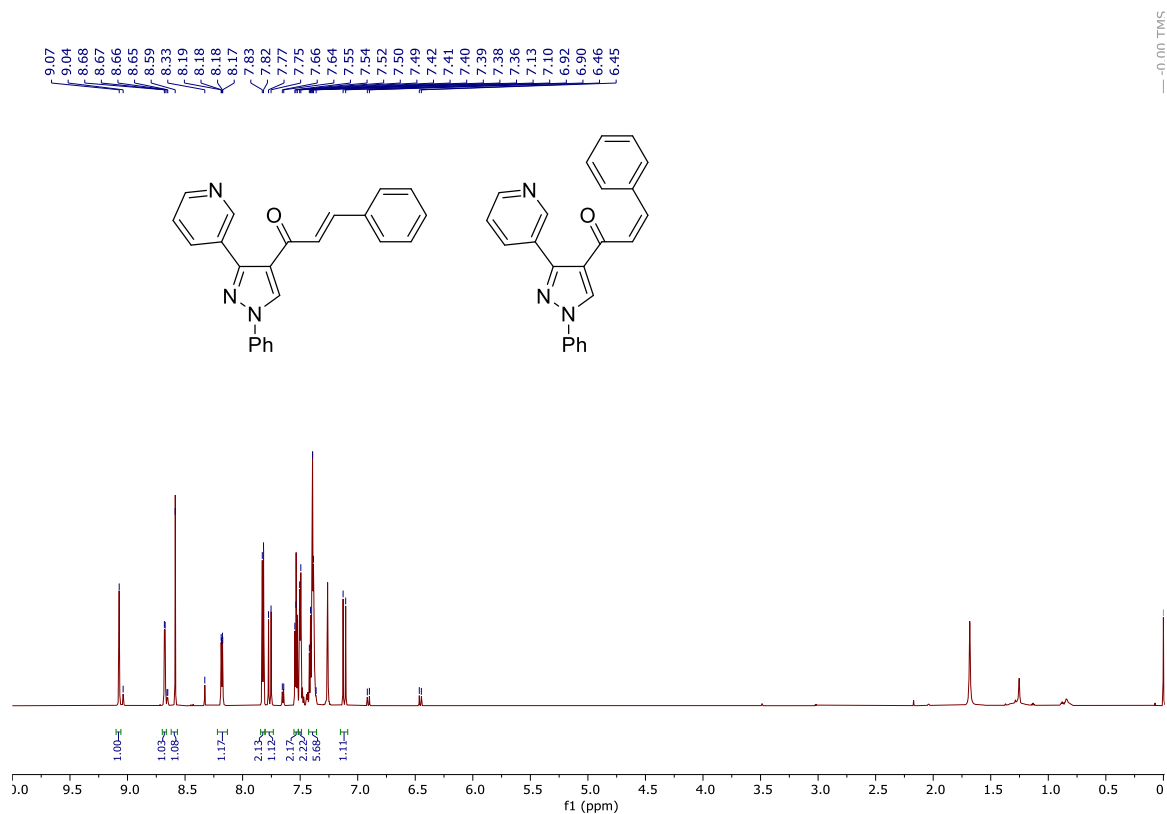

**Figure S141.** (2E/Z)-3-Phenyl-1-[1-phenyl-3-(pyridin-3-yl)-1H-pyrazol-4-yl]prop-2-en-1-one (E-12a, Z-13a). <sup>1</sup>H NMR spectrum (700 MHz, CDCl<sub>3</sub>)

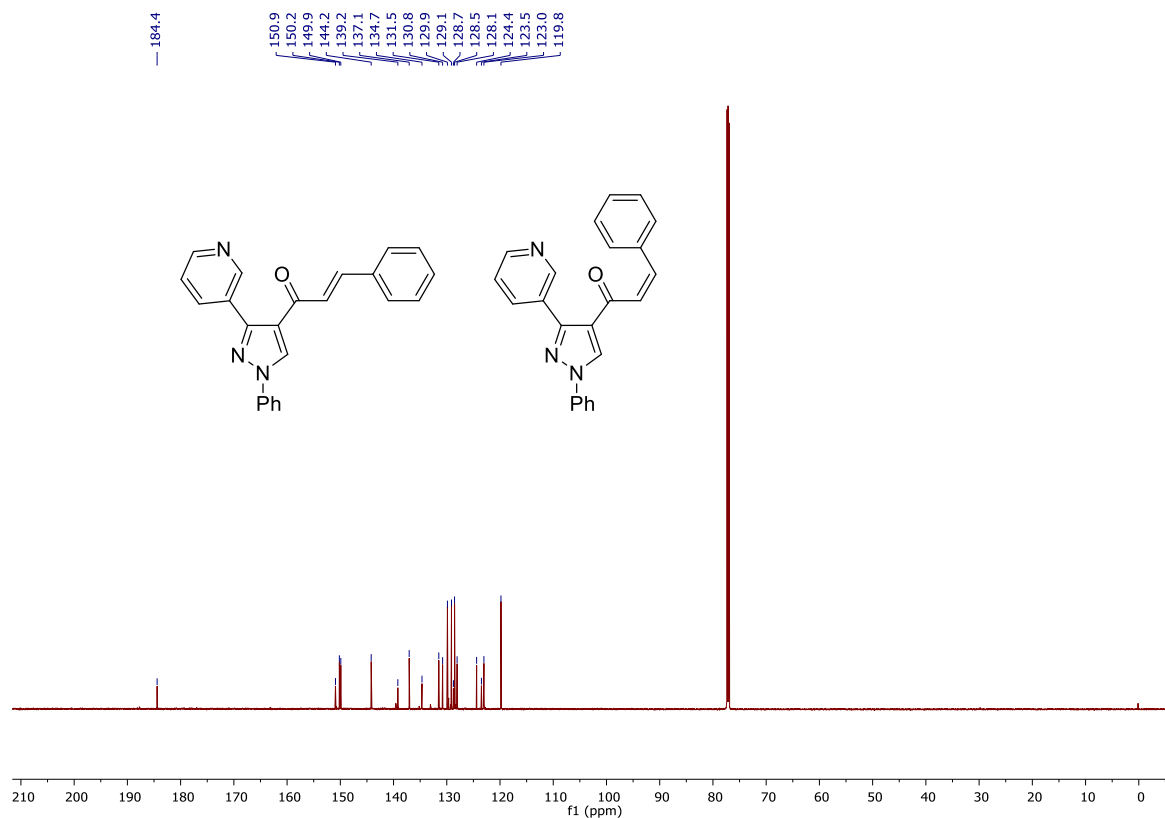

**Figure S142.** (2E/Z)-3-Phenyl-1-[1-phenyl-3-(pyridin-3-yl)-1H-pyrazol-4-yl]prop-2-en-1-one (E-12a, Z-13a). <sup>13</sup>C NMR spectrum (176 MHz, CDCl<sub>3</sub>)

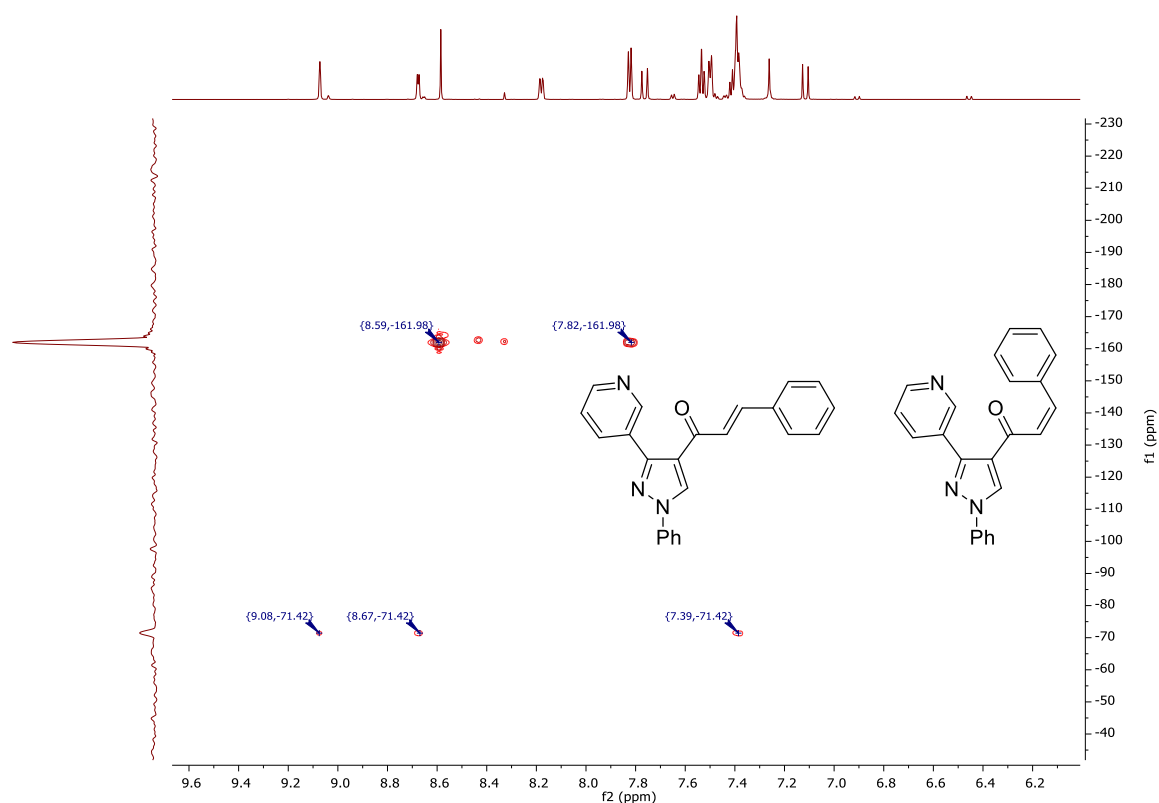

**Figure S143.** (2*E/Z*)-3-Phenyl-1-[1-phenyl-3-(pyridin-3-yl)-1*H*-pyrazol-4-yl]prop-2-en-1-one (*E*-12a, *Z*-13a).  $^1\text{H}$ - $^{15}\text{N}$  HMBC NMR spectrum (71 MHz,  $\text{CDCl}_3$ )

**+MS, 4.8min #286**

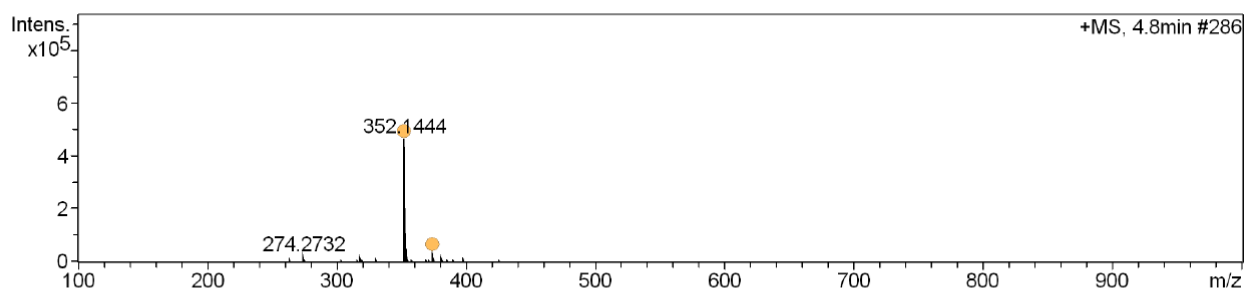

| Meas. m/z | # | Ion Formula                                        | m/z      | err [ppm] | mSigma | # Sigma | Score  | rdb  | e <sup>-</sup> Conf | N-Rule |
|-----------|---|----------------------------------------------------|----------|-----------|--------|---------|--------|------|---------------------|--------|
| 352.1444  | 1 | C <sub>23</sub> H <sub>18</sub> N <sub>3</sub> O   | 352.1444 | 0.0       | 5.8    | 1       | 100.00 | 16.5 | even                | ok     |
| 374.1261  | 1 | C <sub>23</sub> H <sub>17</sub> N <sub>3</sub> NaO | 374.1264 | 0.8       | 5.6    | 1       | 100.00 | 16.5 | even                | ok     |

**Figure S144.** (2*E/Z*)-3-Phenyl-1-[1-phenyl-3-(pyridin-3-yl)-1*H*-pyrazol-4-yl]prop-2-en-1-one (*E*-12a, *Z*-13a). HRMS (ESI-TOF).

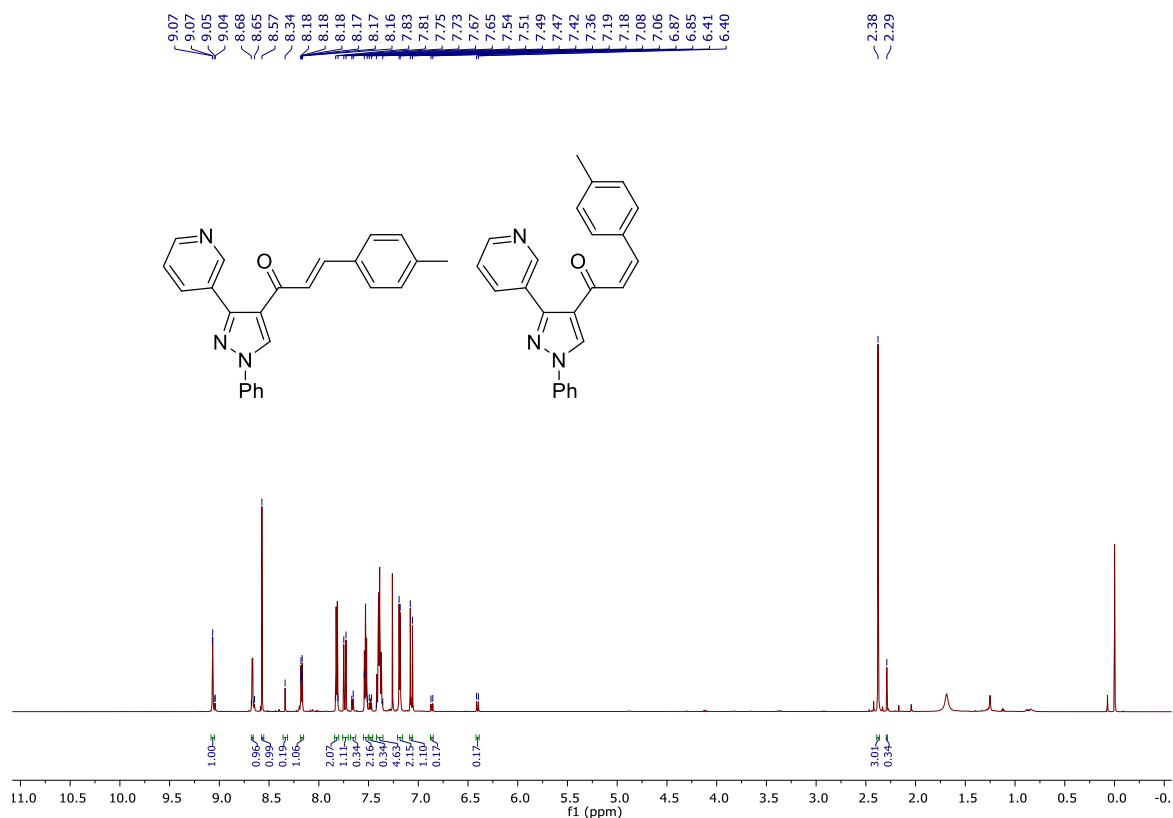

**Figure S145.** (2*E/Z*)-3-(4-Methylphenyl)-1-[1-phenyl-3-(pyridin-3-yl)-1*H*-Pyrazol-4-yl]prop-2-en-1-one (E-12b, Z-13b). <sup>1</sup>H NMR spectrum (700 MHz, CDCl<sub>3</sub>)

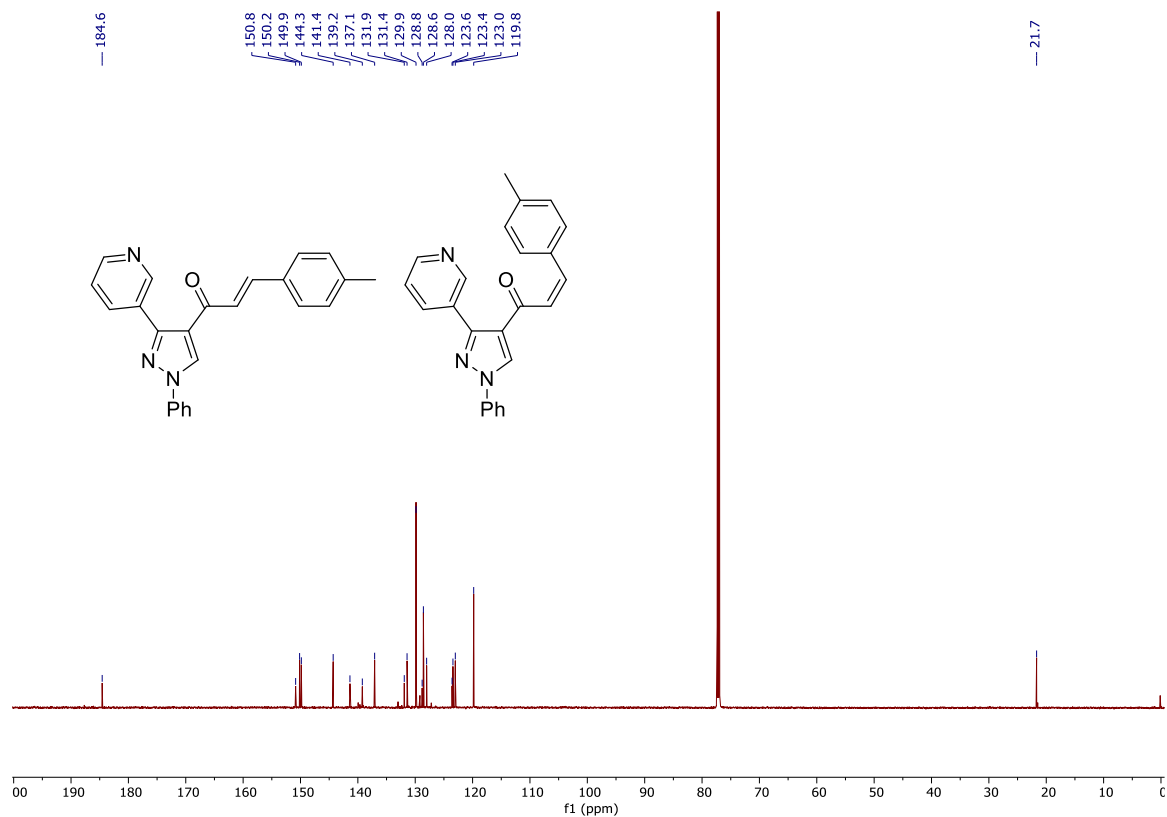

**Figure S146.** (2*E/Z*)-3-(4-Methylphenyl)-1-[1-phenyl-3-(pyridin-3-yl)-1*H*-Pyrazol-4-yl]prop-2-en-1-one (E-12b, Z-13b). <sup>13</sup>C NMR spectrum (176 MHz, CDCl<sub>3</sub>)

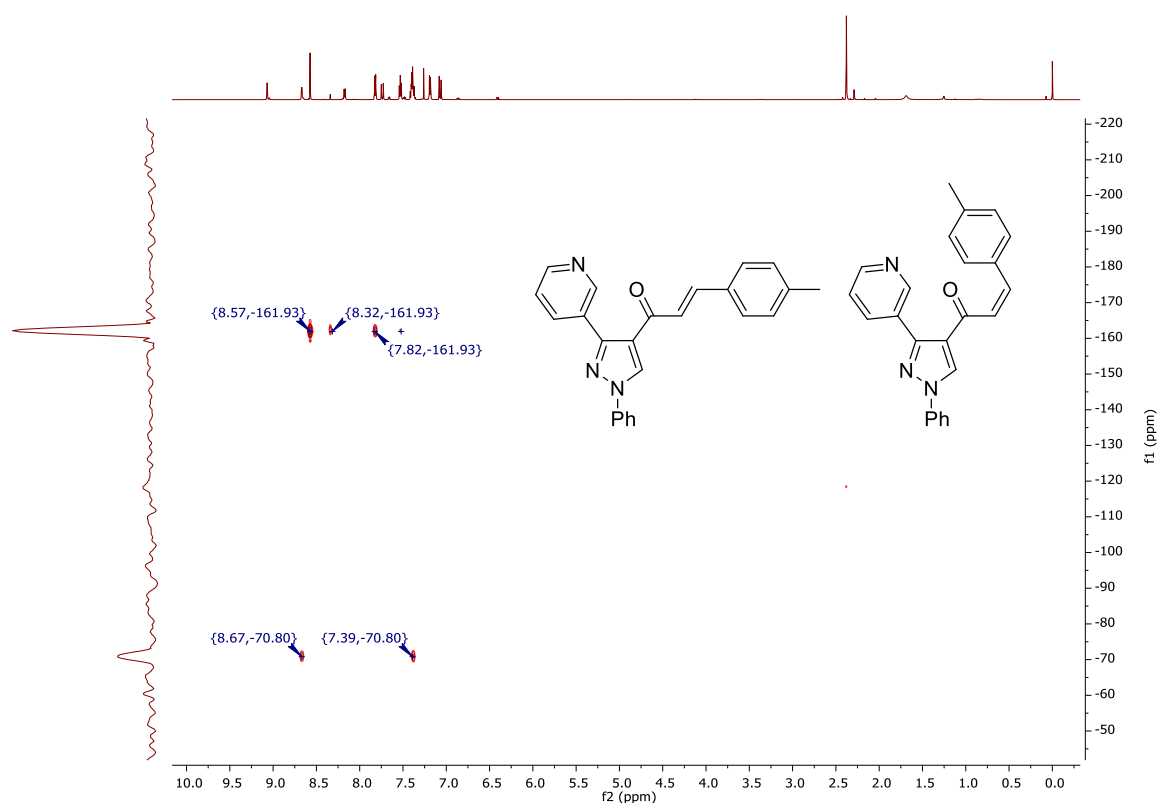

**Figure S147.** (2*E/Z*)-3-(4-Methylphenyl)-1-[1-phenyl-3-(pyridin-3-yl)-1*H*-Pyrazol-4-yl]prop-2-en-1-one (*E*-12b, *Z*-13b).  $^1\text{H}$ - $^{15}\text{N}$  HMBC NMR spectrum (71 MHz,  $\text{CDCl}_3$ )

+MS, 4.4min #263

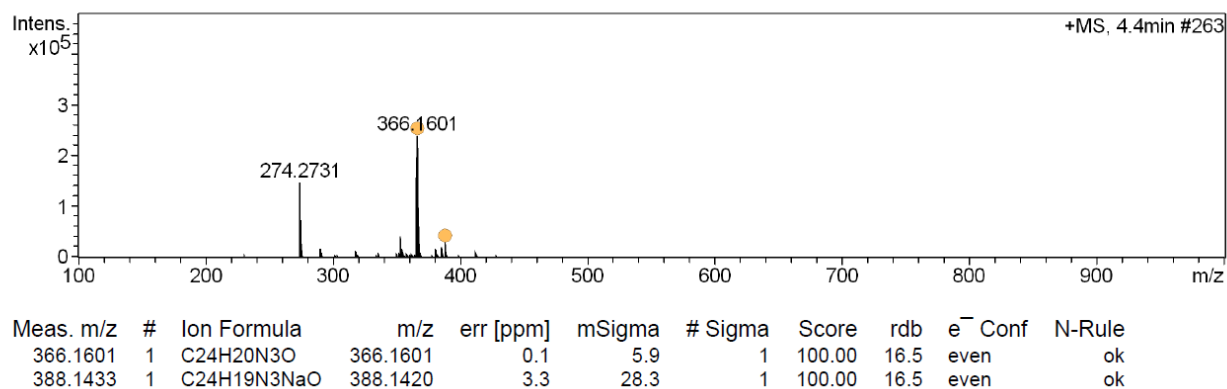

**Figure S148.** (2*E/Z*)-3-(4-Methylphenyl)-1-[1-phenyl-3-(pyridin-3-yl)-1*H*-Pyrazol-4-yl]prop-2-en-1-one (*E*-12b, *Z*-13b). HRMS (ESI-TOF).

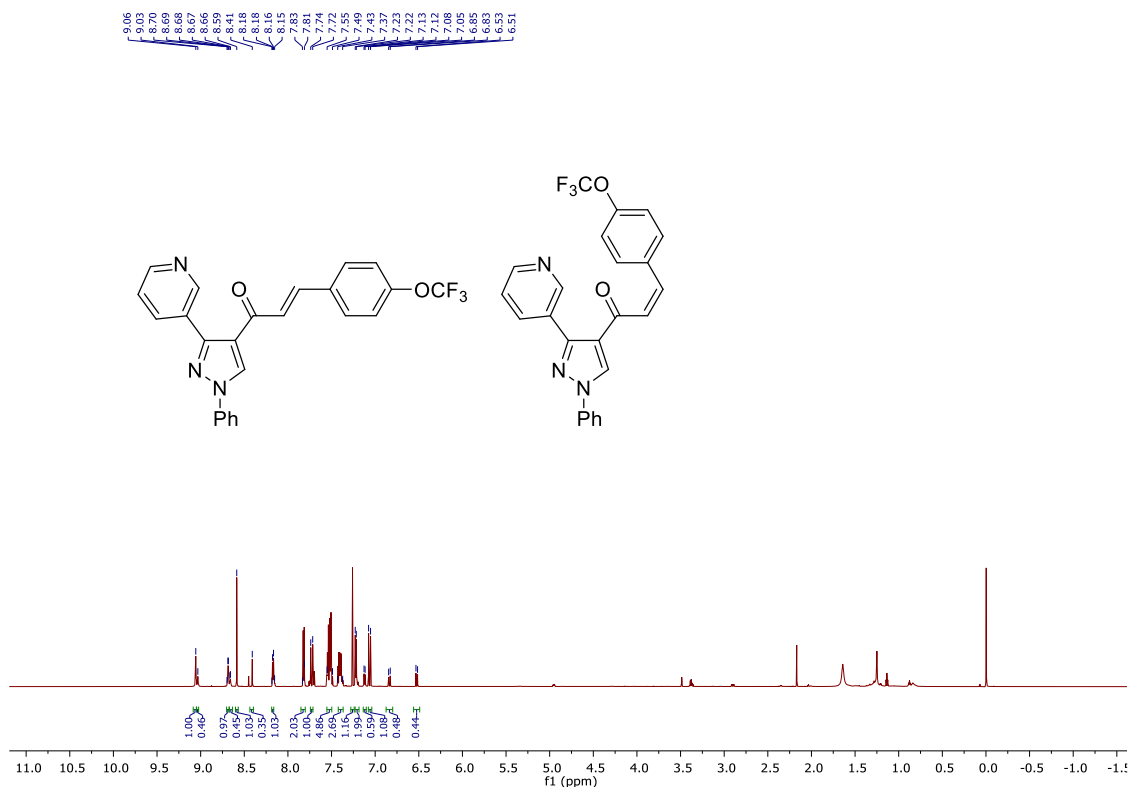

**Figure S149.** (2*E/Z*)-1-[1-Phenyl-3-(pyridine-3-yl)-1*H*-pyrazol-4-yl]-3-[4-(trifluoromethoxy)phenyl]prop-2-en-1-one (*E*-12c, *Z*-13c). <sup>1</sup>H NMR spectrum (700 MHz, CDCl<sub>3</sub>)

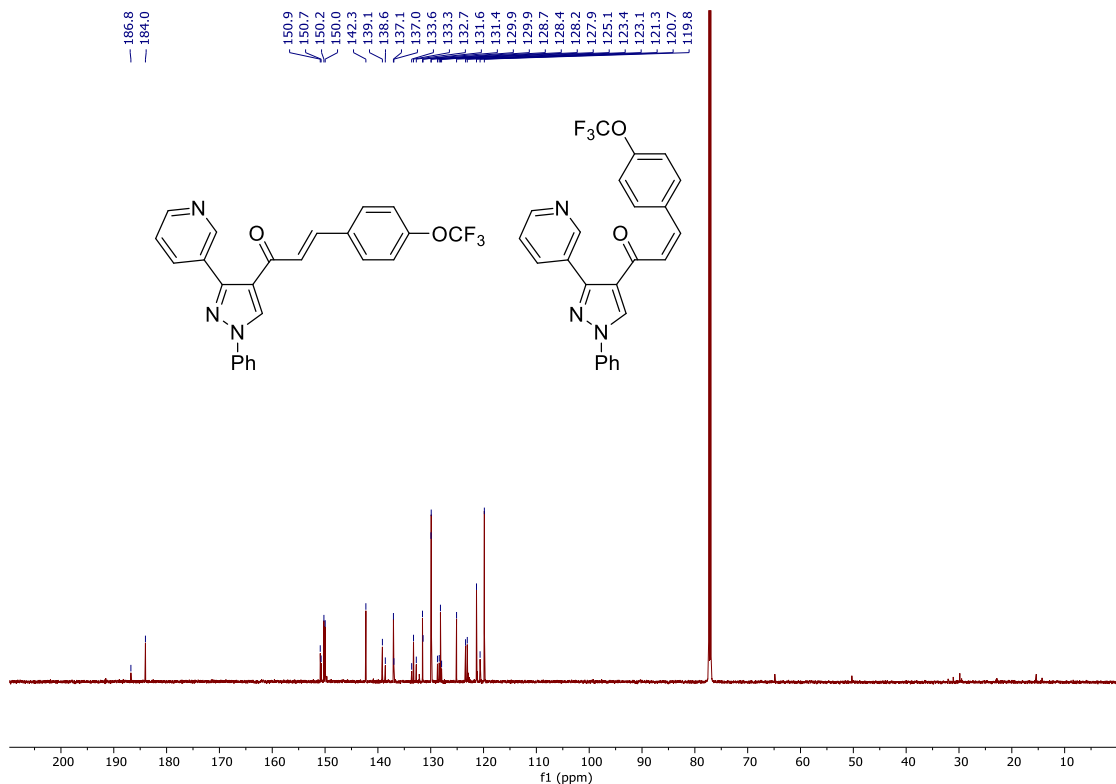

**Figure S150.** (2*E/Z*)-1-[1-Phenyl-3-(pyridine-3-yl)-1*H*-pyrazol-4-yl]-3-[4-(trifluoromethoxy)phenyl]prop-2-en-1-one (*E*-12c, *Z*-13c). <sup>13</sup>C NMR spectrum (176 MHz, CDCl<sub>3</sub>)



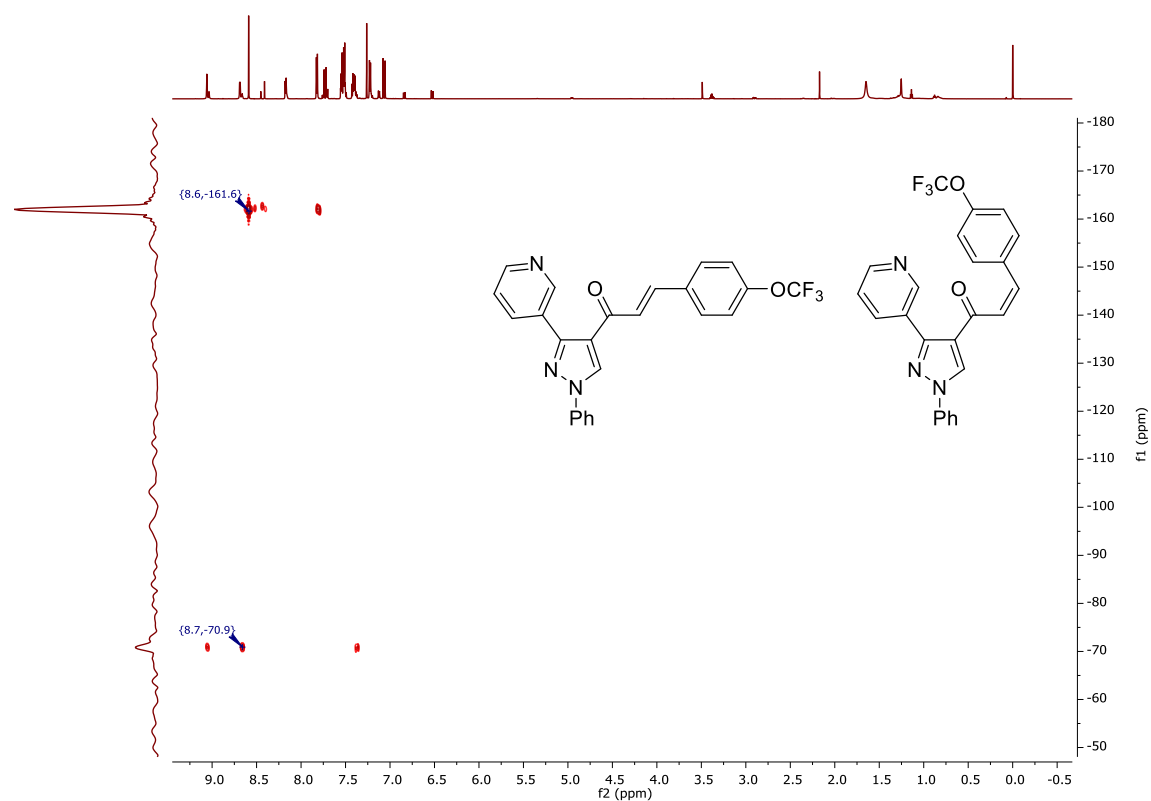

**Figure S151.** (2*E/Z*)-1-[1-Phenyl-3-(pyridine-3-yl)-1*H*-pyrazol-4-yl]-3-[4-(trifluoromethoxy)phenyl]prop-2-en-1-one (*E*-12c, *Z*-13c).  $^1\text{H}$ - $^{15}\text{N}$  HMBC NMR spectrum (71 MHz,  $\text{CDCl}_3$ )

**+MS, 6.2min #374**

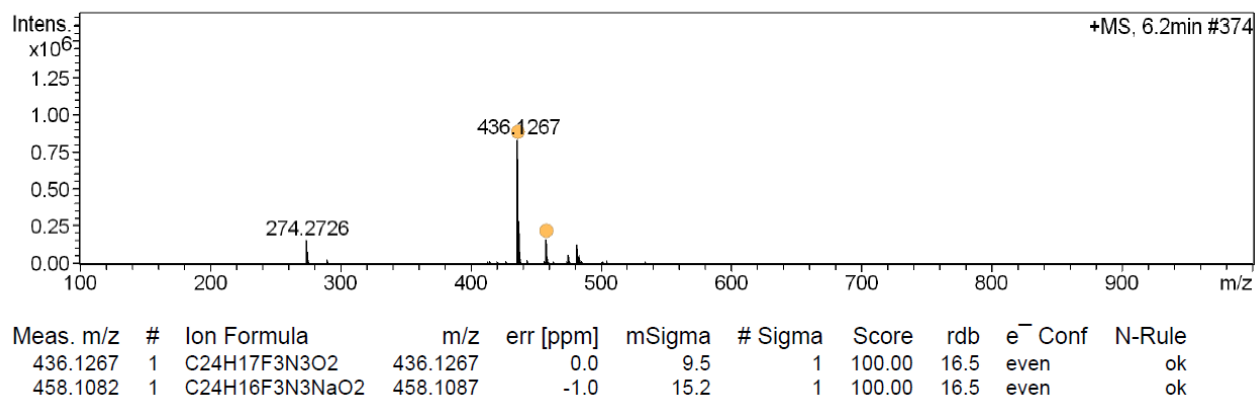

**Figure S152.** (2*E/Z*)-1-[1-Phenyl-3-(pyridine-3-yl)-1*H*-pyrazol-4-yl]-3-[4-(trifluoromethoxy)phenyl]prop-2-en-1-one (*E*-12c, *Z*-13c). HRMS (ESI-TOF).

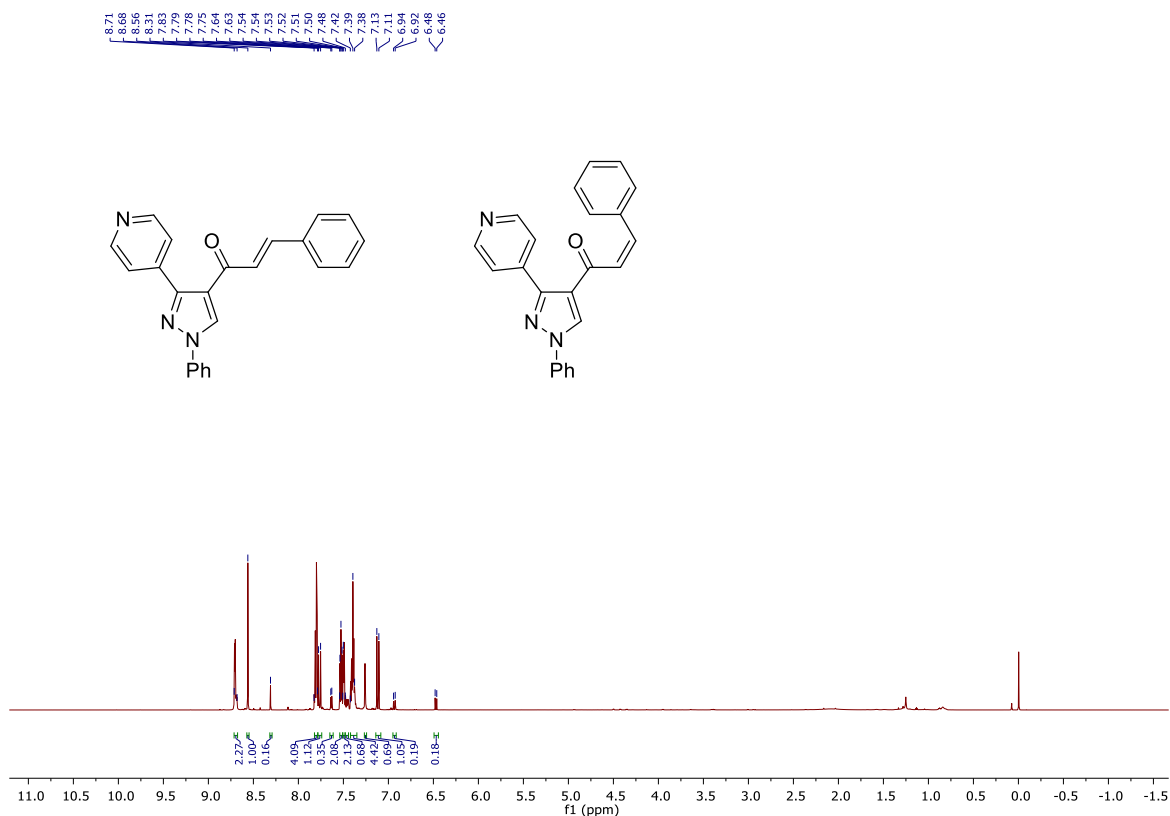

**Figure S153.** (2*E/Z*)-3-Phenyl-1-[1-phenyl-3-(pyridin-4-yl)-1*H*-pyrazol-4-yl]prop-2-en-1-one (*E*-12d, *Z*-13d). <sup>1</sup>H NMR spectrum (700 MHz, CDCl<sub>3</sub>)

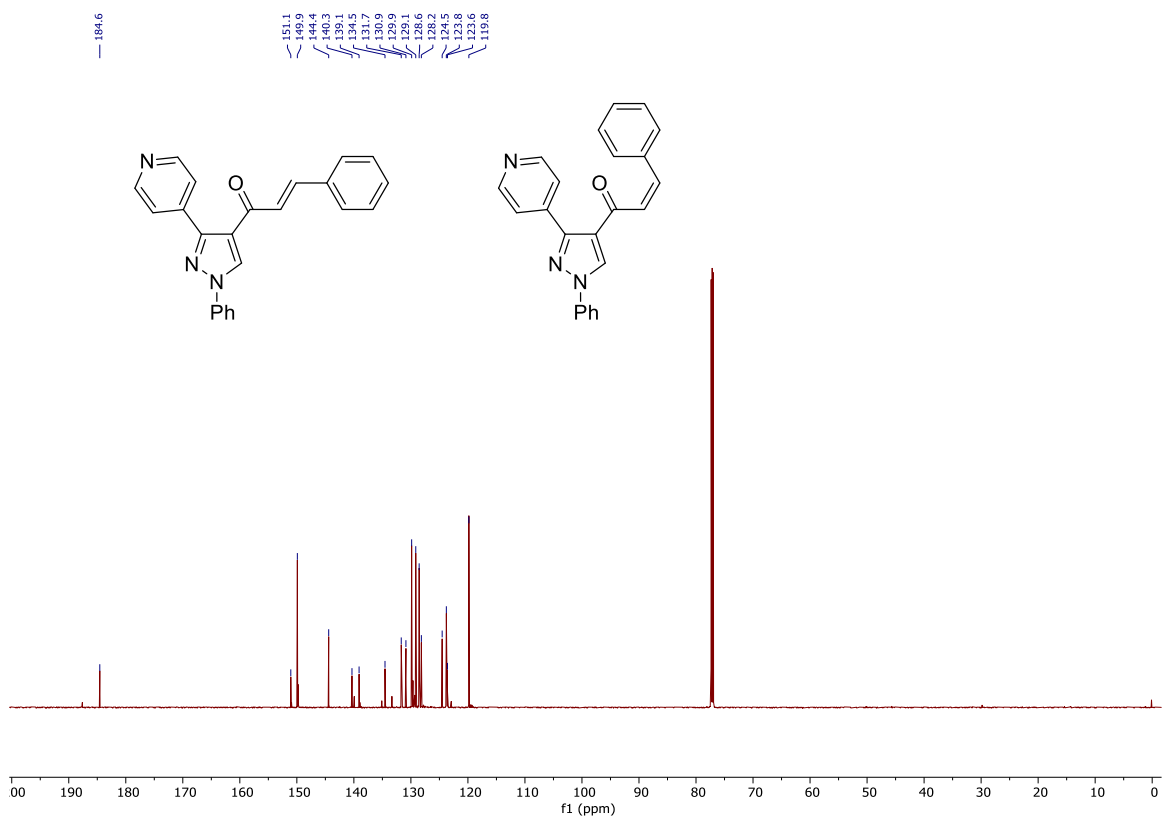

**Figure S154.** (2*E/Z*)-3-Phenyl-1-[1-phenyl-3-(pyridin-4-yl)-1*H*-pyrazol-4-yl]prop-2-en-1-one (*E*-12d, *Z*-13d). <sup>13</sup>C NMR spectrum (176 MHz, CDCl<sub>3</sub>)

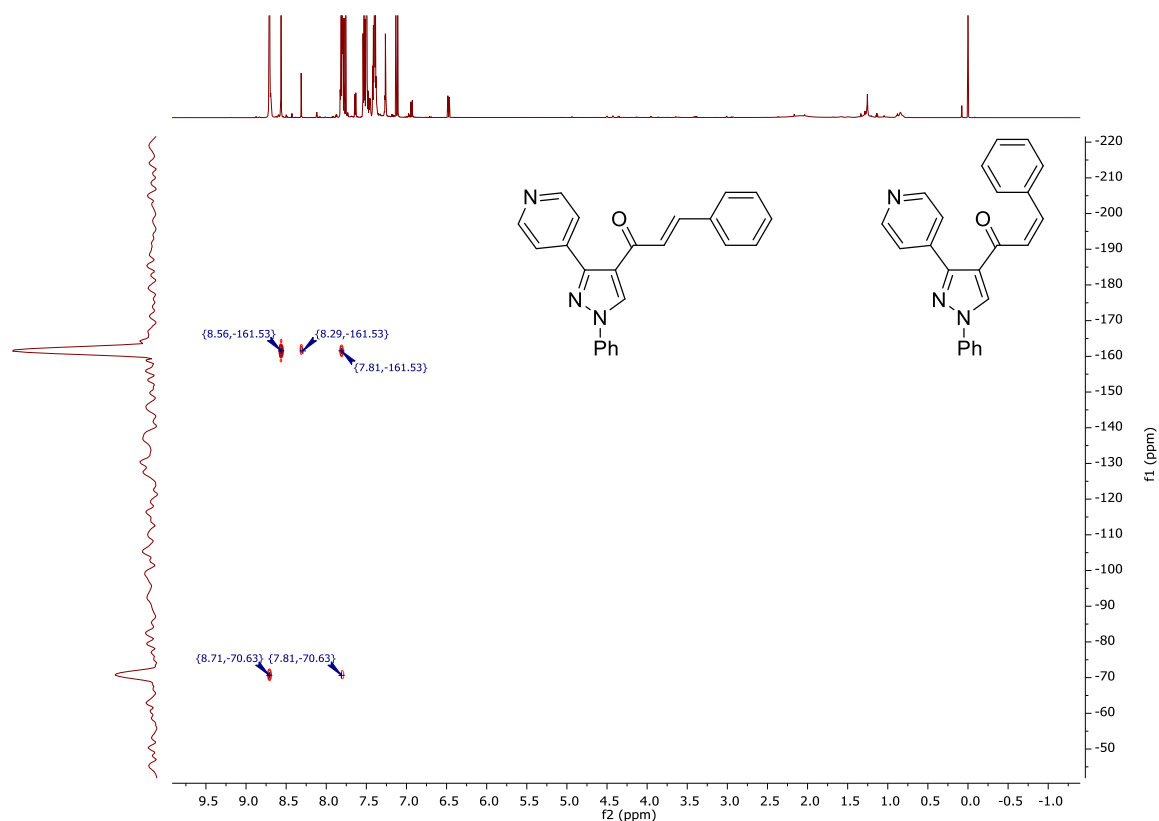

**Figure S155.** (2*E/Z*)-3-Phenyl-1-[1-phenyl-3-(pyridin-4-yl)-1*H*-pyrazol-4-yl]prop-2-en-1-one (*E*-12d, *Z*-13d).  $^1\text{H}$ - $^{15}\text{N}$  HMBC NMR spectrum (71 MHz,  $\text{CDCl}_3$ )

**+MS, 4.0min #237**

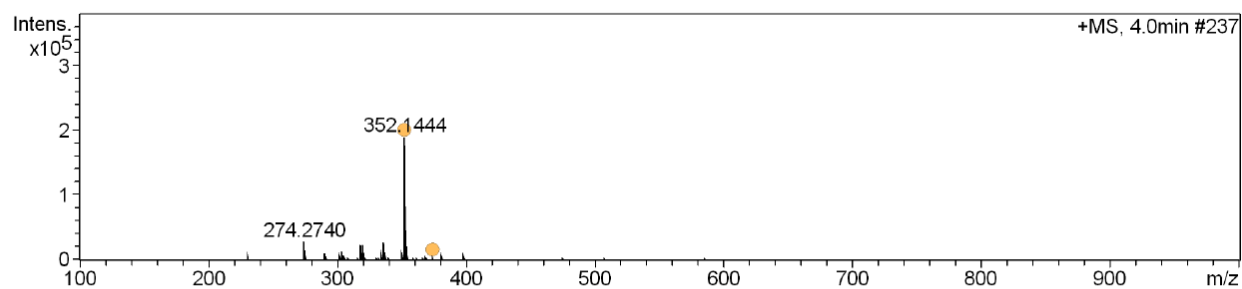

| Meas. m/z | # | Ion Formula                                        | m/z      | err [ppm] | mSigma | # Sigma | Score  | rdb  | e <sup>-</sup> Conf | N-Rule |
|-----------|---|----------------------------------------------------|----------|-----------|--------|---------|--------|------|---------------------|--------|
| 352.1444  | 1 | C <sub>23</sub> H <sub>18</sub> N <sub>3</sub> O   | 352.1444 | -0.1      | 2.5    | 1       | 100.00 | 16.5 | even                | ok     |
| 374.1266  | 1 | C <sub>23</sub> H <sub>17</sub> N <sub>3</sub> NaO | 374.1264 | -0.6      | 18.1   | 1       | 100.00 | 16.5 | even                | ok     |

**Figure S156.** (2*E/Z*)-3-Phenyl-1-[1-phenyl-3-(pyridin-4-yl)-1*H*-pyrazol-4-yl]prop-2-en-1-one (*E*-12d, *Z*-13d). HRMS (ESI-TOF).

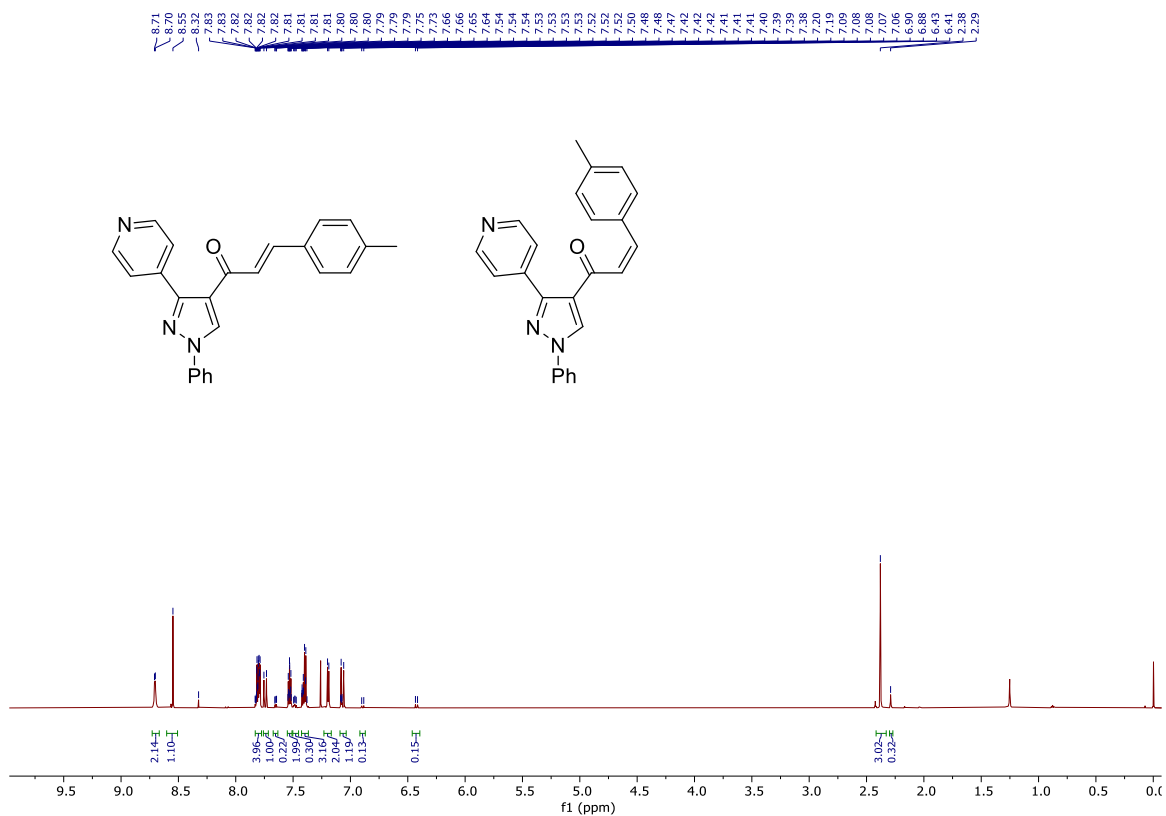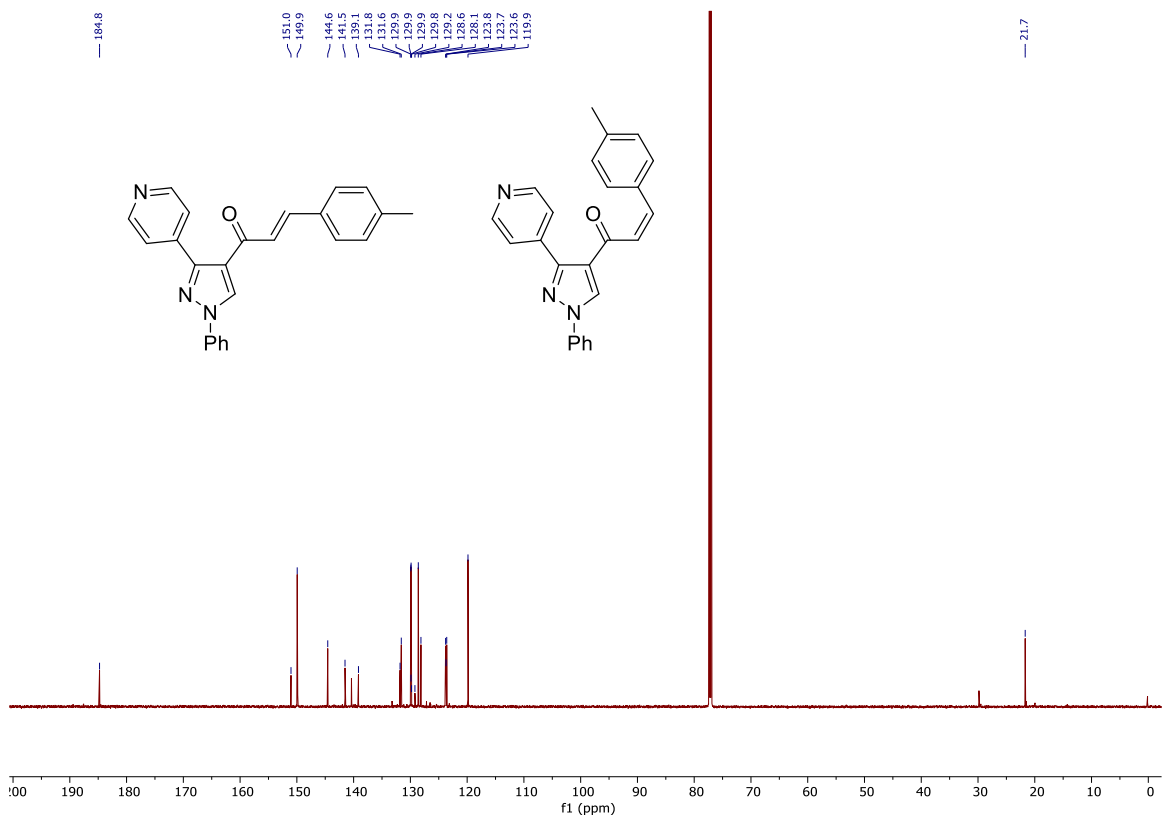

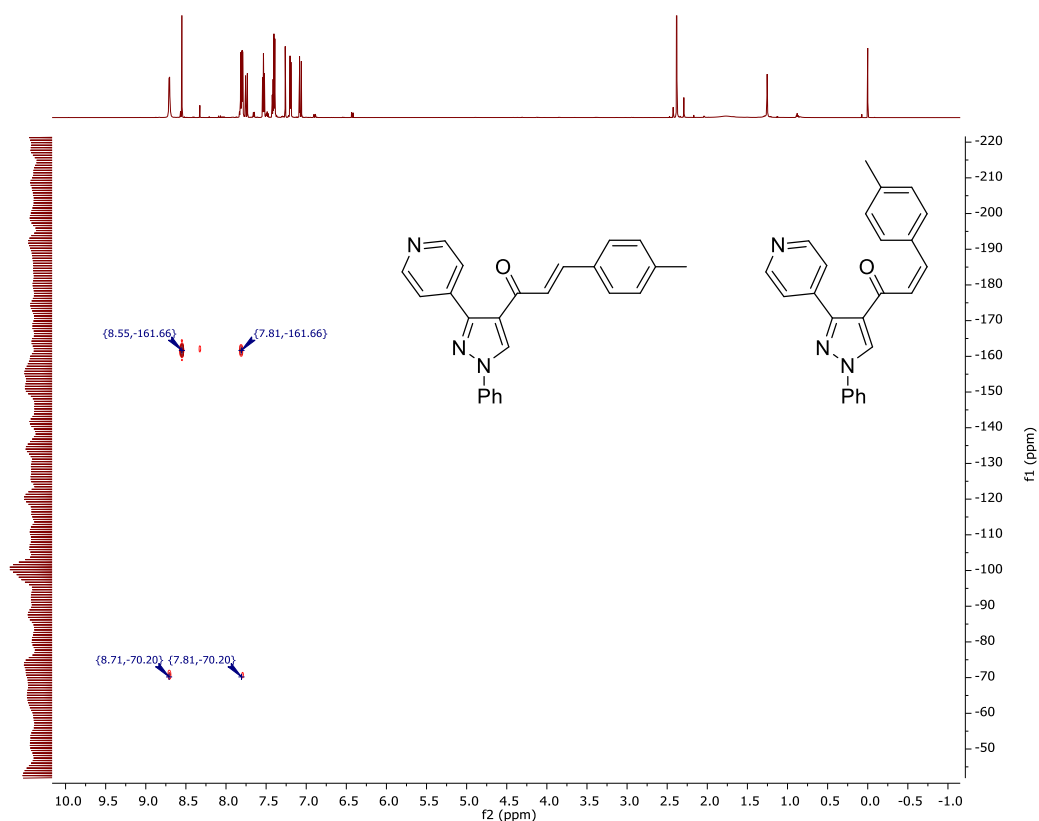

**Figure S159.** (2*E/Z*)-3-(4-Methylphenyl)-1-[1-phenyl-3-(pyridine-4-yl)-1*H*-pyrazol-4-yl]prop-2-en-1-one (*E*-12e, *Z*-13e).  $^1\text{H}$ - $^{15}\text{N}$  HMBC NMR spectrum (71 MHz,  $\text{CDCl}_3$ )

+MS, 3.5min #212

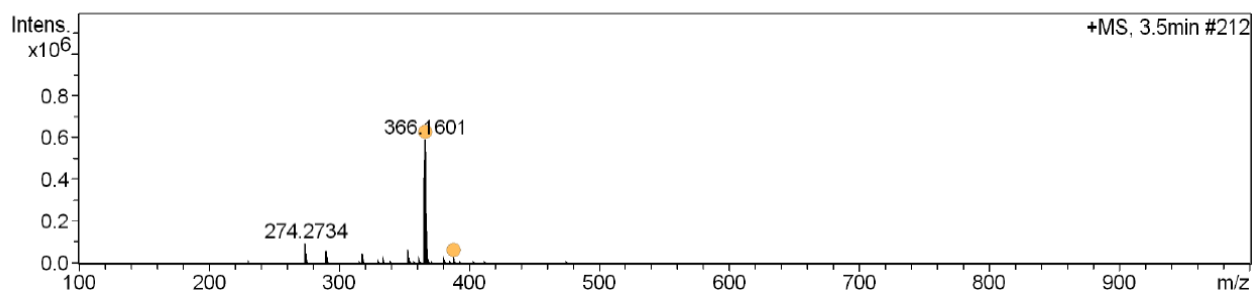

| Meas. m/z | # | Ion Formula                                        | m/z      | err [ppm] | mSigma | # Sigma | Score  | rdb  | e <sup>-</sup> Conf | N-Rule |
|-----------|---|----------------------------------------------------|----------|-----------|--------|---------|--------|------|---------------------|--------|
| 366.1601  | 1 | C <sub>24</sub> H <sub>20</sub> N <sub>3</sub> O   | 366.1601 | -0.0      | 9.5    | 1       | 100.00 | 16.5 | even                | ok     |
| 388.1422  | 1 | C <sub>24</sub> H <sub>19</sub> N <sub>3</sub> NaO | 388.1420 | -0.4      | 2.7    | 1       | 100.00 | 16.5 | even                | ok     |

**Figure S160.** (2*E/Z*)-3-(4-Methylphenyl)-1-[1-phenyl-3-(pyridine-4-yl)-1*H*-pyrazol-4-yl]prop-2-en-1-one (*E*-12e, *Z*-13e). HRMS (ESI-TOF).

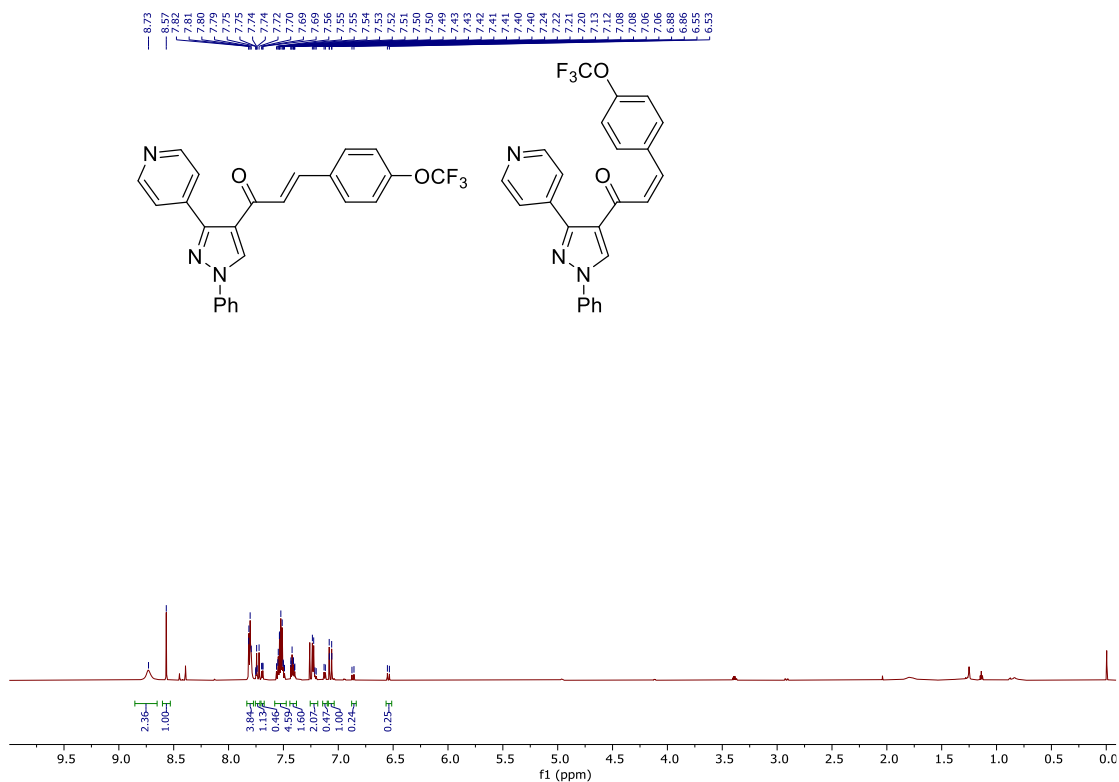

**Figure S161.** (2*E/Z*)-1-[1-Phenyl-3-(pyridine-4-yl)-1*H*-pyrazol-4-yl]-3-[4-(trifluoromethoxy)phenyl]prop-2-en-1-one spectrum (*E*-12f, *Z*-13f). <sup>1</sup>H NMR spectrum (700 MHz, CDCl<sub>3</sub>)

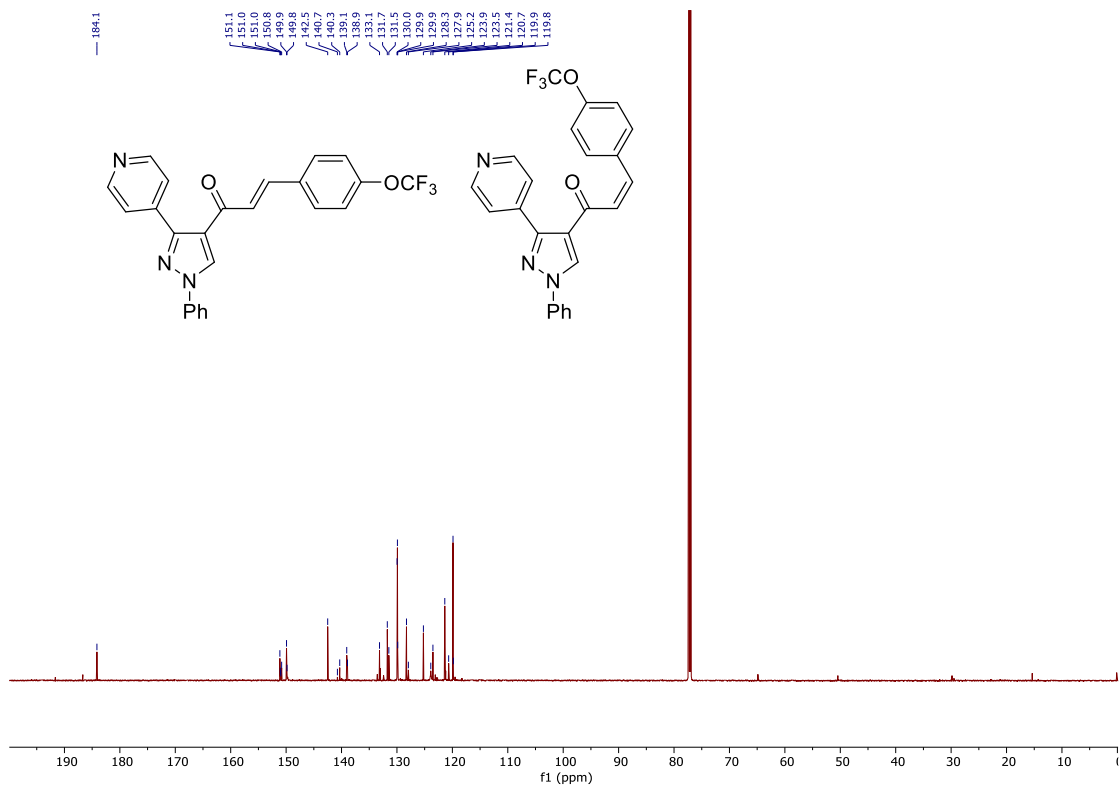

**Figure S162.** (2*E/Z*)-1-[1-Phenyl-3-(pyridine-4-yl)-1*H*-pyrazol-4-yl]-3-[4-(trifluoromethoxy)phenyl]prop-2-en-1-one spectrum (*E*-12f, *Z*-13f). <sup>13</sup>C NMR spectrum (176 MHz, CDCl<sub>3</sub>)

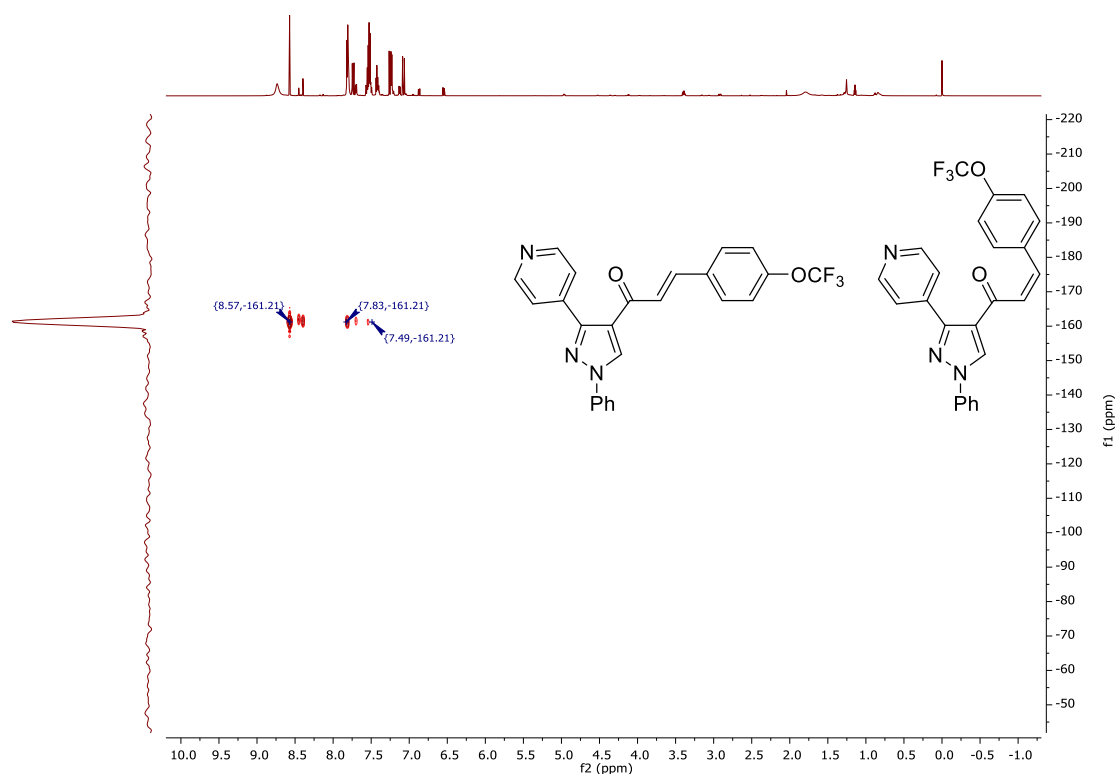

**Figure S163.** (2*E/Z*)-1-[1-Phenyl-3-(pyridine-4-yl)-1*H*-pyrazol-4-yl]-3-[4-(trifluoromethoxy)phenyl]prop-2-en-1-one (*E*-12f, *Z*-13f).  $^1\text{H}$ - $^{15}\text{N}$  HMBC NMR spectrum (71 MHz,  $\text{CDCl}_3$ )

**+MS, 4.1min #248**

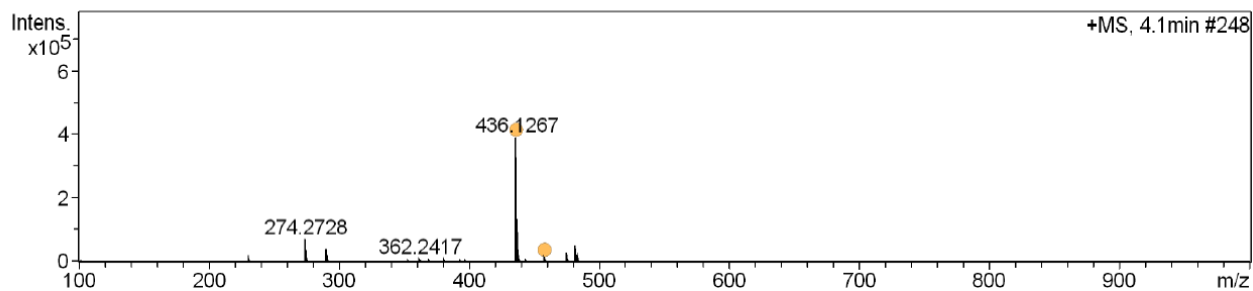

| Meas. m/z | # | Ion Formula                                                                    | m/z      | err [ppm] | mSigma | # Sigma | Score  | rdb  | e <sup>-</sup> | Conf | N-Rule |
|-----------|---|--------------------------------------------------------------------------------|----------|-----------|--------|---------|--------|------|----------------|------|--------|
| 436.1267  | 1 | C <sub>24</sub> H <sub>17</sub> F <sub>3</sub> N <sub>3</sub> O <sub>2</sub>   | 436.1267 | 0.0       | 12.5   | 1       | 100.00 | 16.5 | even           |      | ok     |
| 458.1083  | 1 | C <sub>24</sub> H <sub>16</sub> F <sub>3</sub> N <sub>3</sub> NaO <sub>2</sub> | 458.1087 | -0.9      | 35.7   | 1       | 100.00 | 16.5 | even           |      | ok     |

**Figure S164.** (2*E/Z*)-1-[1-Phenyl-3-(pyridine-4-yl)-1*H*-pyrazol-4-yl]-3-[4-(trifluoromethoxy)phenyl]prop-2-en-1-one (*E*-12f, *Z*-13f). HRMS (ESI-TOF).

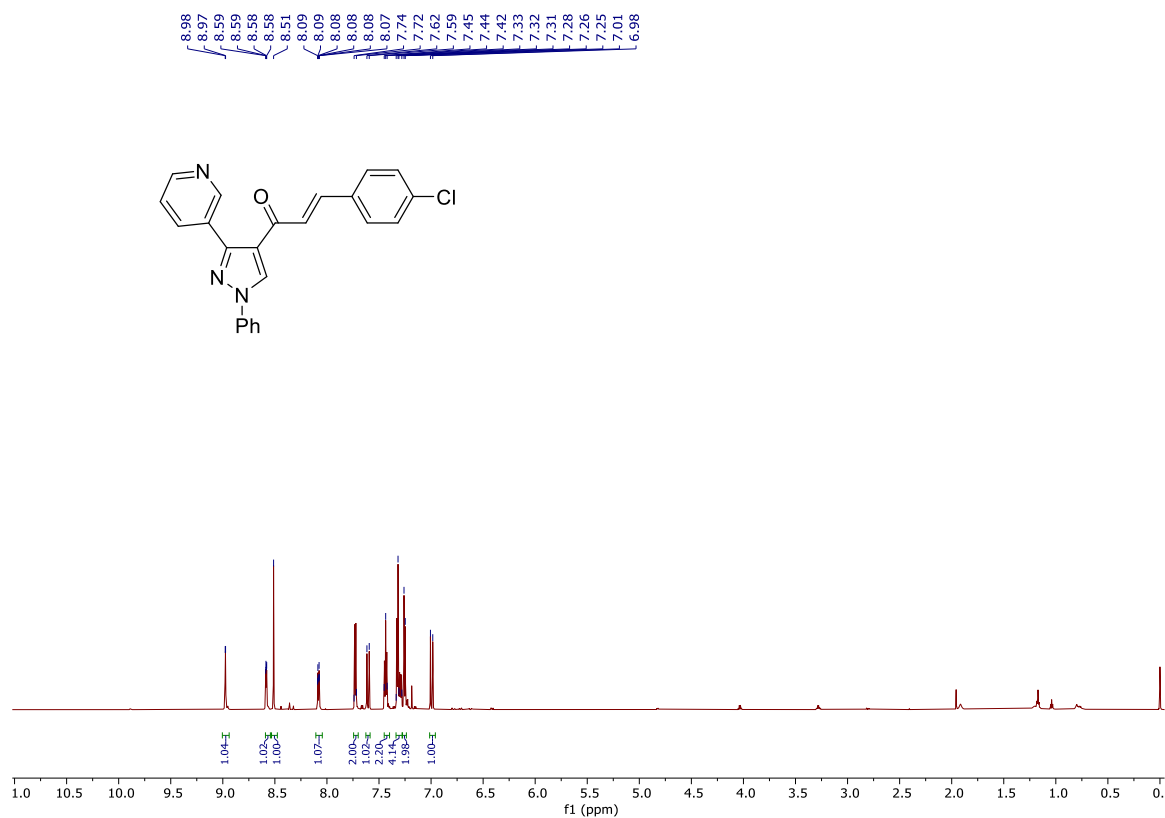

**Figure S165.** (2E)-3-(4-Chlorophenyl)-1-[1-phenyl-3-(pyridin-3-yl)-1H-pyrazol-4-yl]prop-2-en-1-one (12g). <sup>1</sup>H NMR spectrum (700 MHz, CDCl<sub>3</sub>)

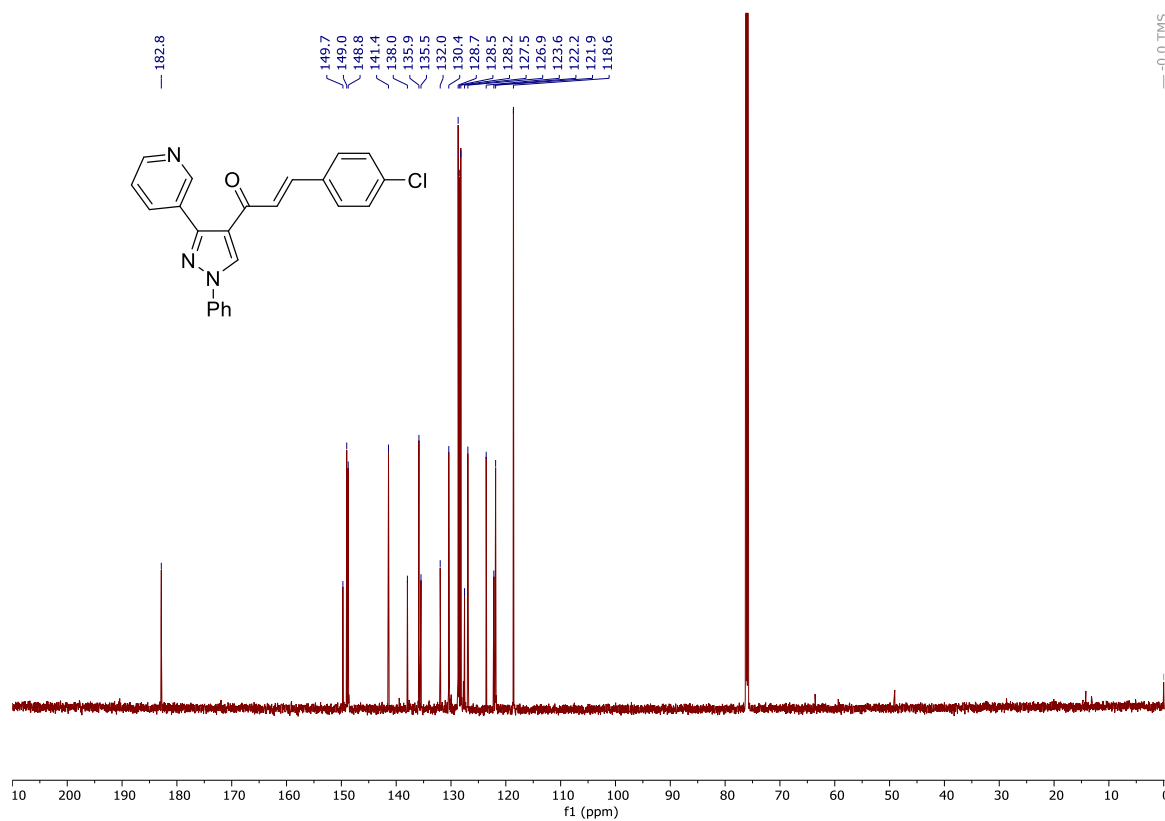

**Figure S166.** (2E)-3-(4-Chlorophenyl)-1-[1-phenyl-3-(pyridin-3-yl)-1H-pyrazol-4-yl]prop-2-en-1-one (12g). <sup>13</sup>C NMR spectrum (176 MHz, CDCl<sub>3</sub>)



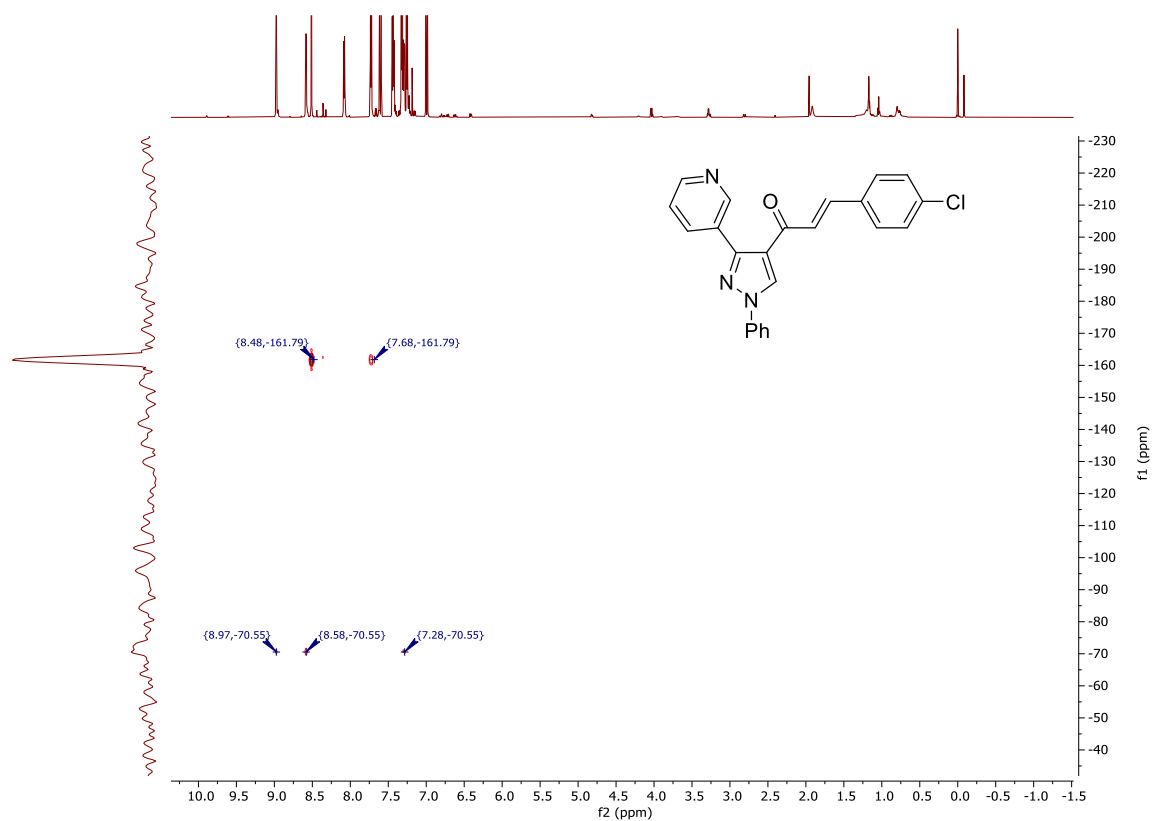

**Figure S167.** (2*E*)-3-(4-Chlorophenyl)-1-[1-phenyl-3-(pyridin-3-yl)-1*H*-pyrazol-4-yl]prop-2-en-1-one (12g).  $^1\text{H}$ - $^{15}\text{N}$  HMBC NMR spectrum (71 MHz,  $\text{CDCl}_3$ )

+MS, 5.3min #313

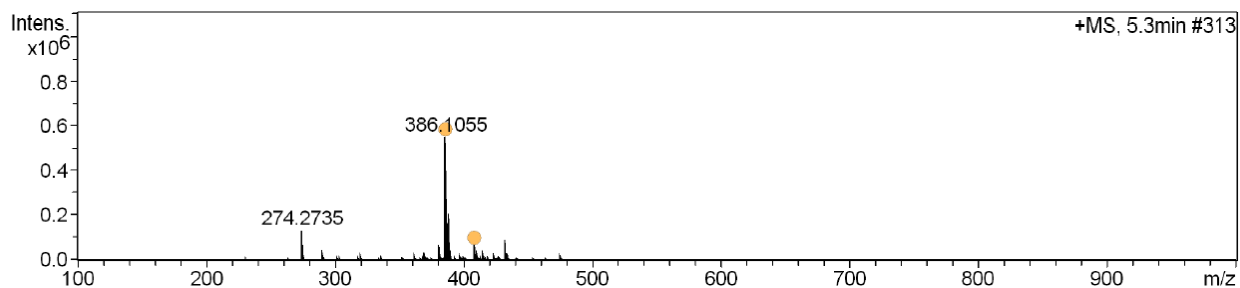

| Meas. m/z | # | Ion Formula                                          | m/z      | err [ppm] | mSigma | # Sigma | Score  | rdb  | e <sup>-</sup> Conf | N-Rule |
|-----------|---|------------------------------------------------------|----------|-----------|--------|---------|--------|------|---------------------|--------|
| 386.1055  | 1 | C <sub>23</sub> H <sub>17</sub> ClN <sub>3</sub> O   | 386.1055 | -0.1      | 14.7   | 1       | 100.00 | 16.5 | even                | ok     |
| 408.0874  | 1 | C <sub>23</sub> H <sub>16</sub> ClN <sub>3</sub> NaO | 408.0874 | 0.1       | 52.5   | 1       | 100.00 | 16.5 | even                | ok     |

**Figure S168.** (2*E*)-3-(4-Chlorophenyl)-1-[1-phenyl-3-(pyridin-3-yl)-1*H*-pyrazol-4-yl]prop-2-en-1-one (12g). HRMS (ESI-TOF).

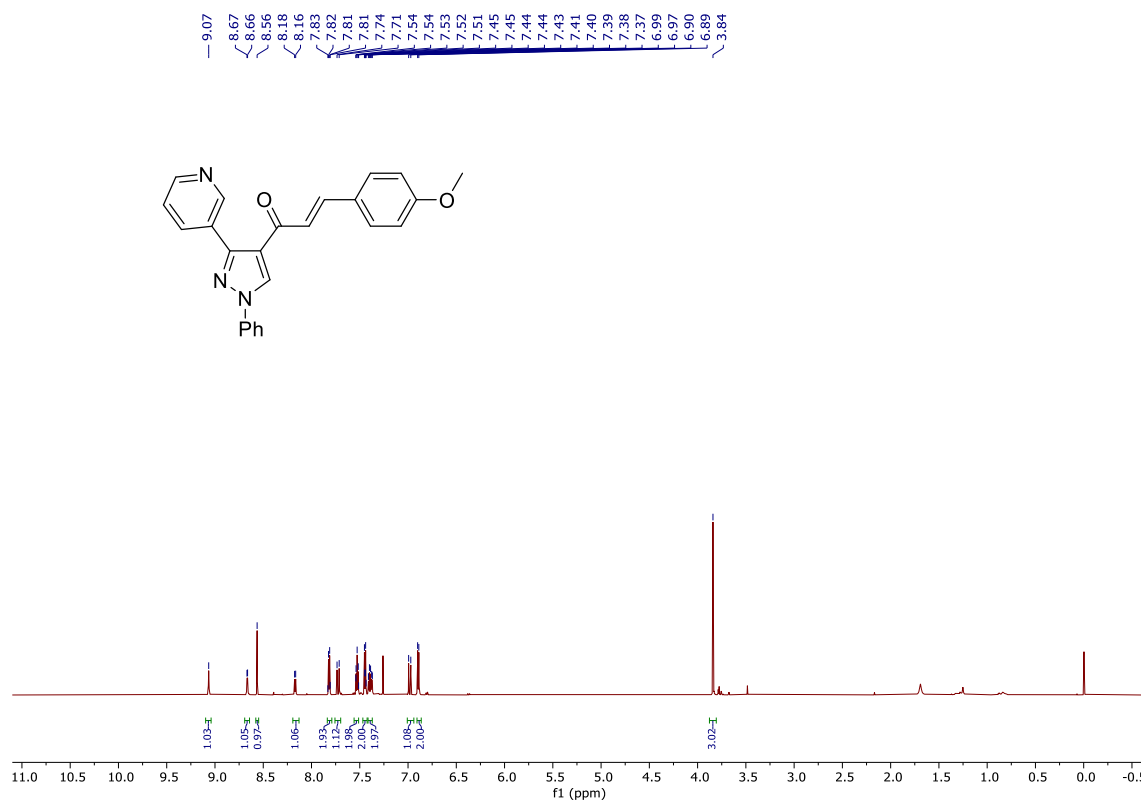

**Figure S169.** (2E)-3-(4-Methoxyphenyl)-1-[1-phenyl-3-(pyridin-3-yl)-1H-pyrazol-4-yl]prop-2-en-1-one (12h). <sup>1</sup>H NMR spectrum (700 MHz, CDCl<sub>3</sub>)

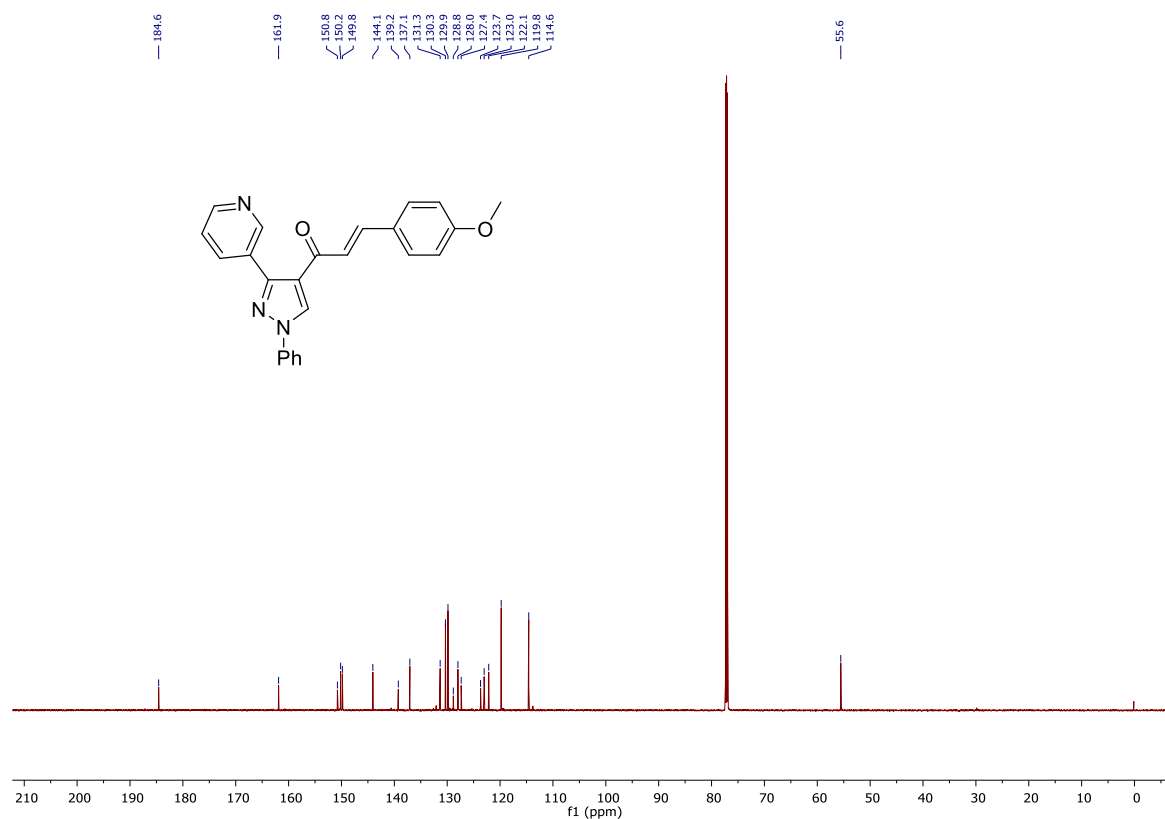

**Figure S170.** (2E)-3-(4-Methoxyphenyl)-1-[1-phenyl-3-(pyridin-3-yl)-1H-pyrazol-4-yl]prop-2-en-1-one (12h). <sup>13</sup>C NMR spectrum (176 MHz, CDCl<sub>3</sub>)

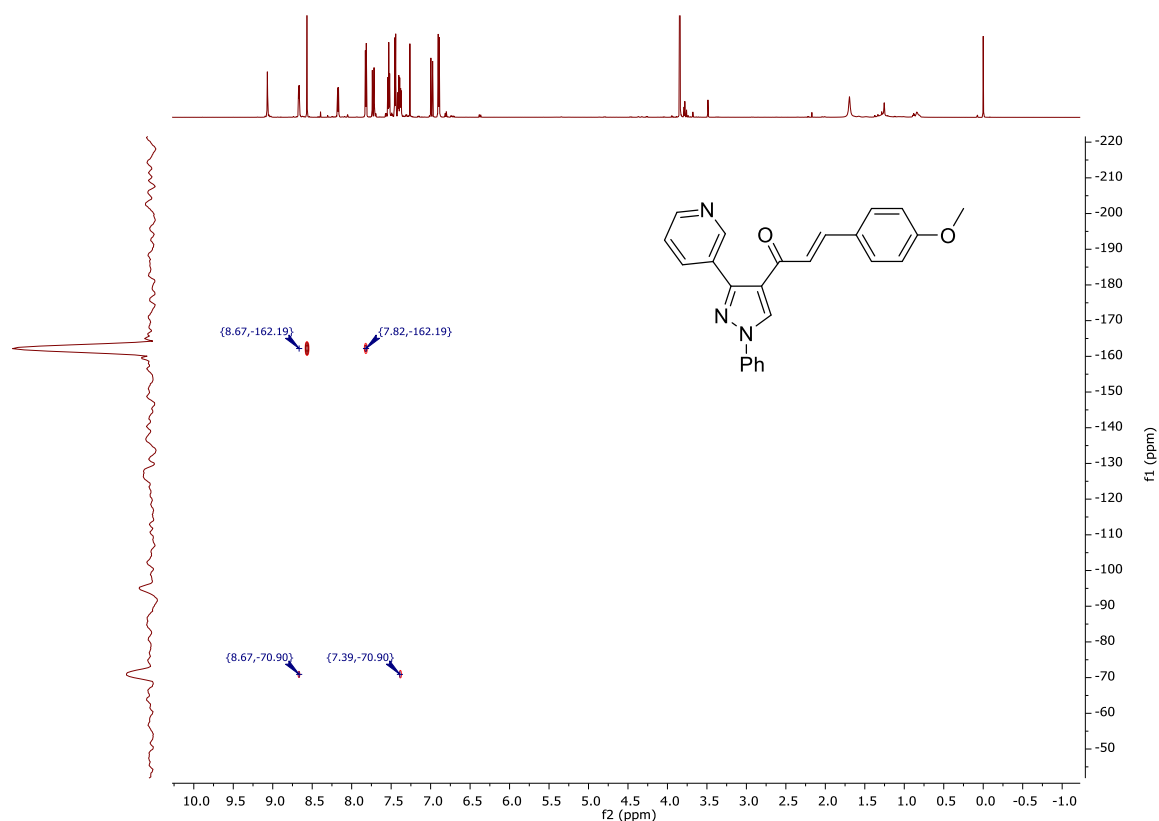

**Figure S171.** (2*E*)-3-(4-Methoxyphenyl)-1-[1-phenyl-3-(pyridin-3-yl)-1*H*-pyrazol-4-yl]prop-2-en-1-one (12h).  $^1\text{H}$ - $^{15}\text{N}$  HMBC NMR spectrum (71 MHz,  $\text{CDCl}_3$ )

**+MS, 5.0min #299**

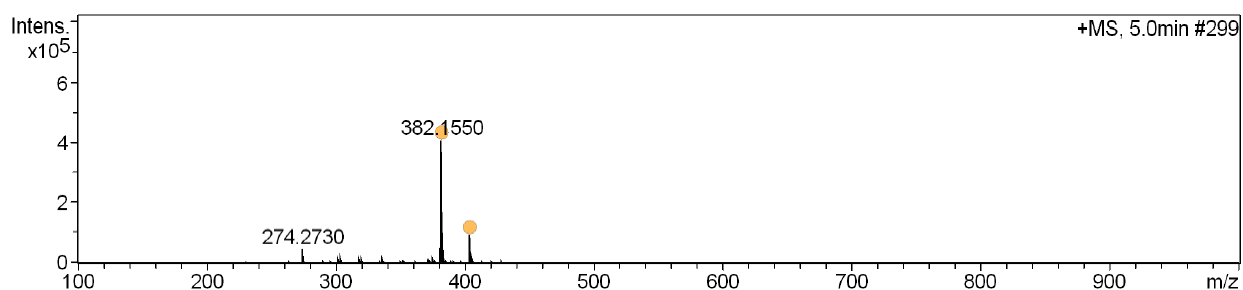

| Meas. m/z | # | Ion Formula                                                     | m/z      | err [ppm] | mSigma | # Sigma | Score  | rdb  | e <sup>-</sup> Conf | N-Rule |
|-----------|---|-----------------------------------------------------------------|----------|-----------|--------|---------|--------|------|---------------------|--------|
| 382.1550  | 1 | C <sub>24</sub> H <sub>20</sub> N <sub>3</sub> O <sub>2</sub>   | 382.1550 | 0.1       | 3.3    | 1       | 100.00 | 16.5 | even                | ok     |
| 404.1369  | 1 | C <sub>24</sub> H <sub>19</sub> N <sub>3</sub> NaO <sub>2</sub> | 404.1369 | -0.1      | 5.7    | 1       | 100.00 | 16.5 | even                | ok     |

**Figure S172.** (2*E*)-3-(4-Methoxyphenyl)-1-[1-phenyl-3-(pyridin-3-yl)-1*H*-pyrazol-4-yl]prop-2-en-1-one (12h). HRMS (ESI-TOF).

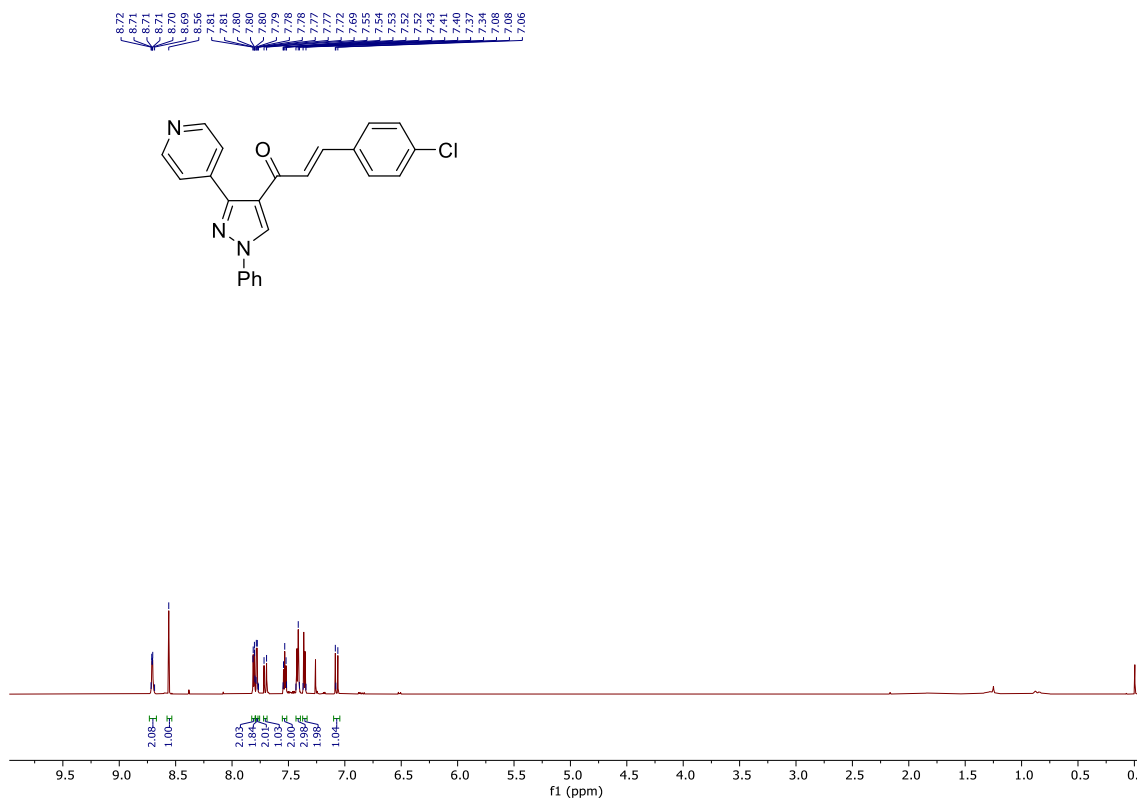

**Figure S173. (2E)-3-(4-Chlorophenyl)-1-[1-phenyl-3-(pyridin-4-yl)-1H-pyrazol-4-yl]prop-2-en-1-one (12i). <sup>1</sup>H NMR spectrum (700 MHz, CDCl<sub>3</sub>)**

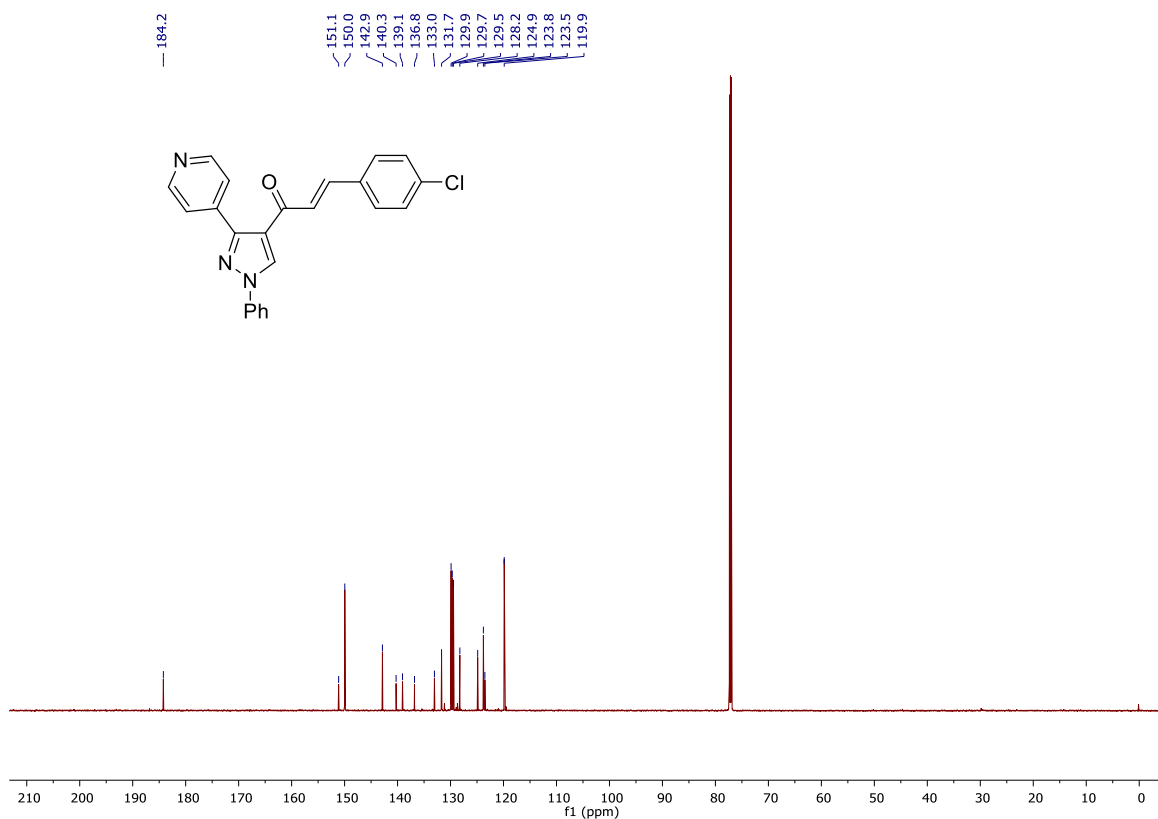

**Figure S174. (2E)-3-(4-Chlorophenyl)-1-[1-phenyl-3-(pyridin-4-yl)-1H-pyrazol-4-yl]prop-2-en-1-one (12i). <sup>13</sup>C NMR spectrum (176 MHz, CDCl<sub>3</sub>)**

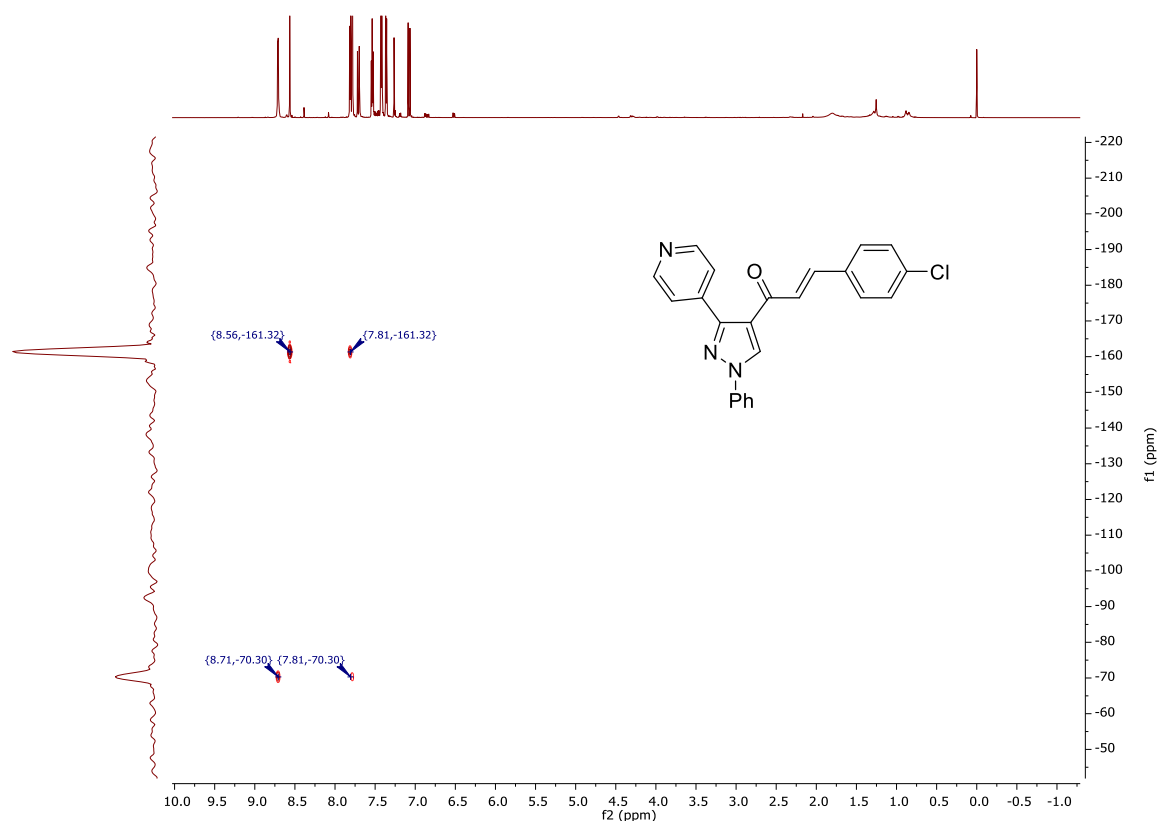

**Figure S175.** (2*E*)-3-(4-Chlorophenyl)-1-[1-phenyl-3-(pyridin-4-yl)-1*H*-pyrazol-4-yl]prop-2-en-1-one (12i).  $^1\text{H}$ - $^{15}\text{N}$  HMBC NMR spectrum (71 MHz,  $\text{CDCl}_3$ )

**+MS, 4.1min #248**

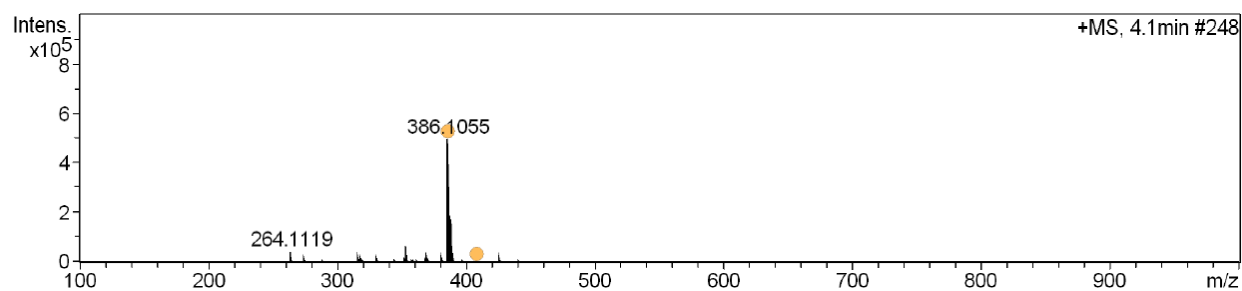

| Meas. m/z | # | Ion Formula                                          | m/z      | err [ppm] | mSigma | # Sigma | Score  | rdb  | e <sup>-</sup> Conf | N-Rule |
|-----------|---|------------------------------------------------------|----------|-----------|--------|---------|--------|------|---------------------|--------|
| 386.1055  | 1 | C <sub>23</sub> H <sub>17</sub> ClN <sub>3</sub> O   | 386.1055 | 0.2       | 4.2    | 1       | 100.00 | 16.5 | even                | ok     |
| 408.0864  | 1 | C <sub>23</sub> H <sub>16</sub> ClN <sub>3</sub> NaO | 408.0874 | 2.5       | 182.6  | 1       | 100.00 | 16.5 | even                | ok     |

**Figure S176.** (2*E*)-3-(4-Chlorophenyl)-1-[1-phenyl-3-(pyridin-4-yl)-1*H*-pyrazol-4-yl]prop-2-en-1-one (12i). HRMS (ESI-TOF).

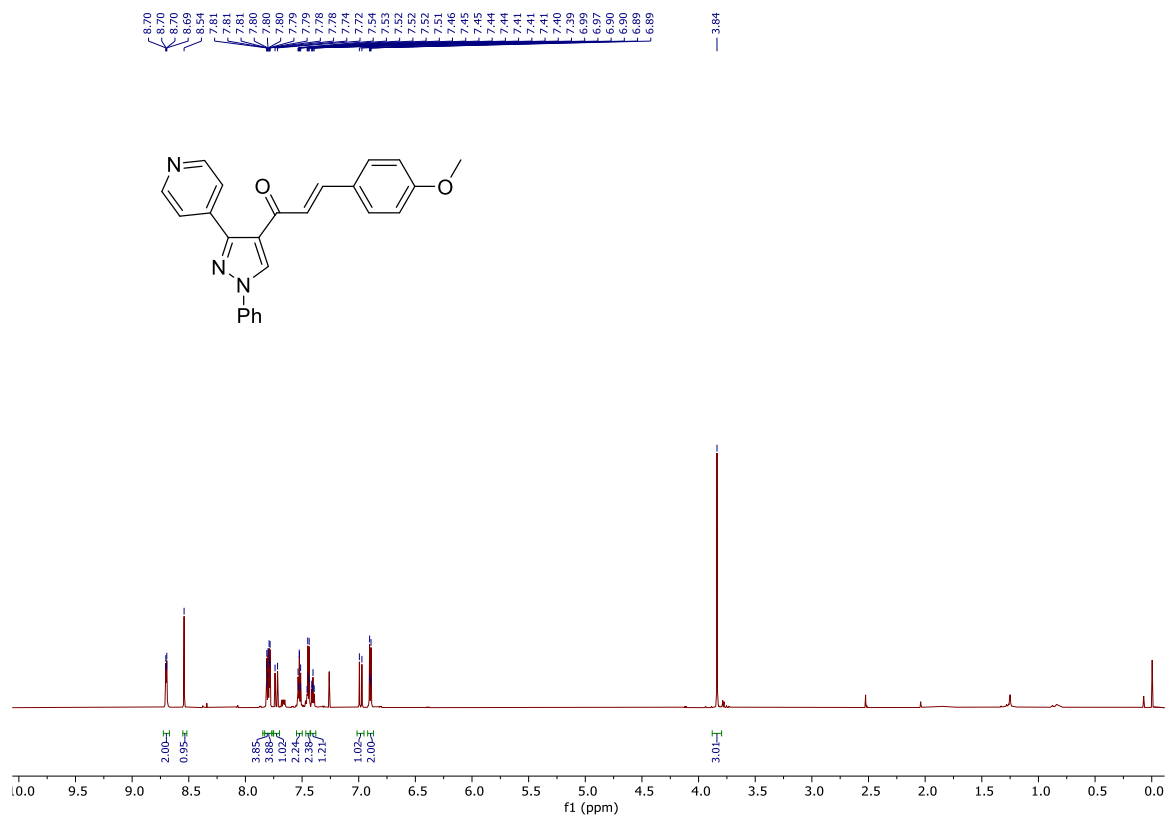

**Figure S177.** (2E)-3-(4-Methoxyphenyl)-1-[1-phenyl-3-(pyridin-4-yl)-1H-pyrazol-4-yl]prop-2-en-1-one (12j). <sup>1</sup>H NMR spectrum (700 MHz, CDCl<sub>3</sub>)

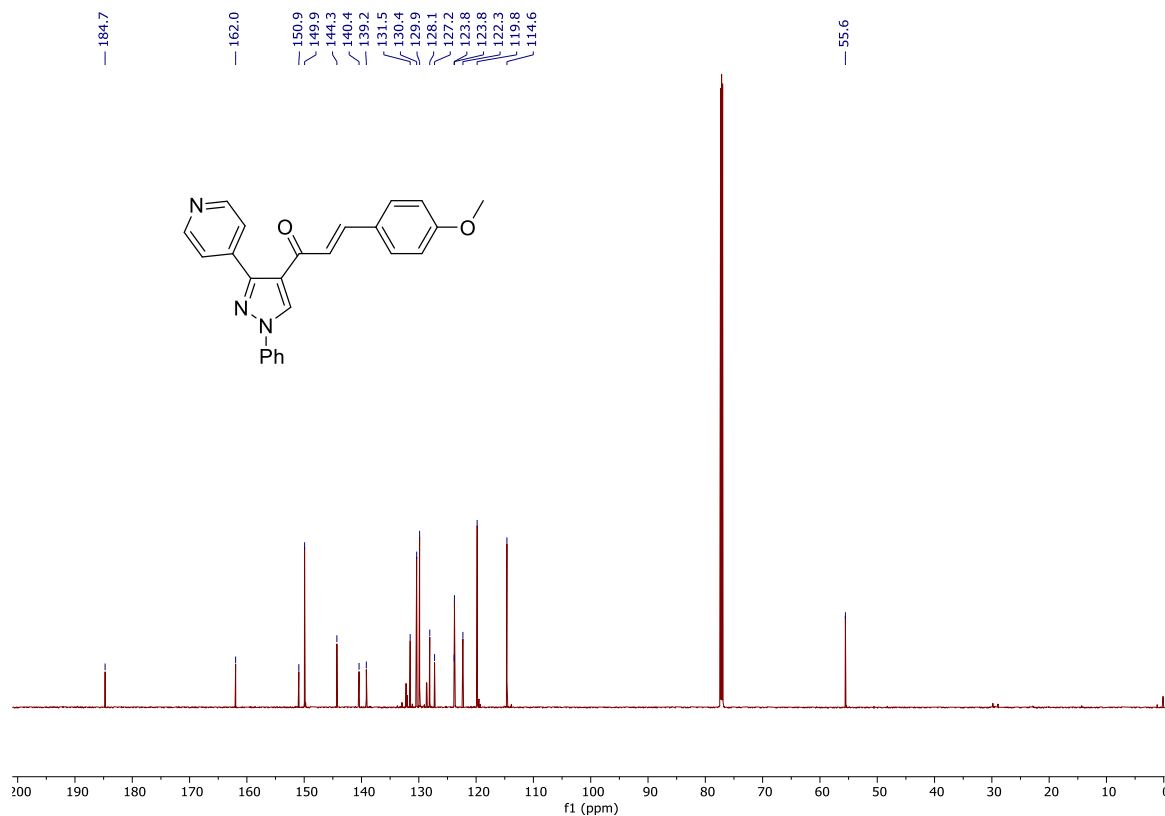

**Figure S178.** (2E)-3-(4-Methoxyphenyl)-1-[1-phenyl-3-(pyridin-4-yl)-1H-pyrazol-4-yl]prop-2-en-1-one (12j). <sup>13</sup>C NMR spectrum (176 MHz, CDCl<sub>3</sub>)

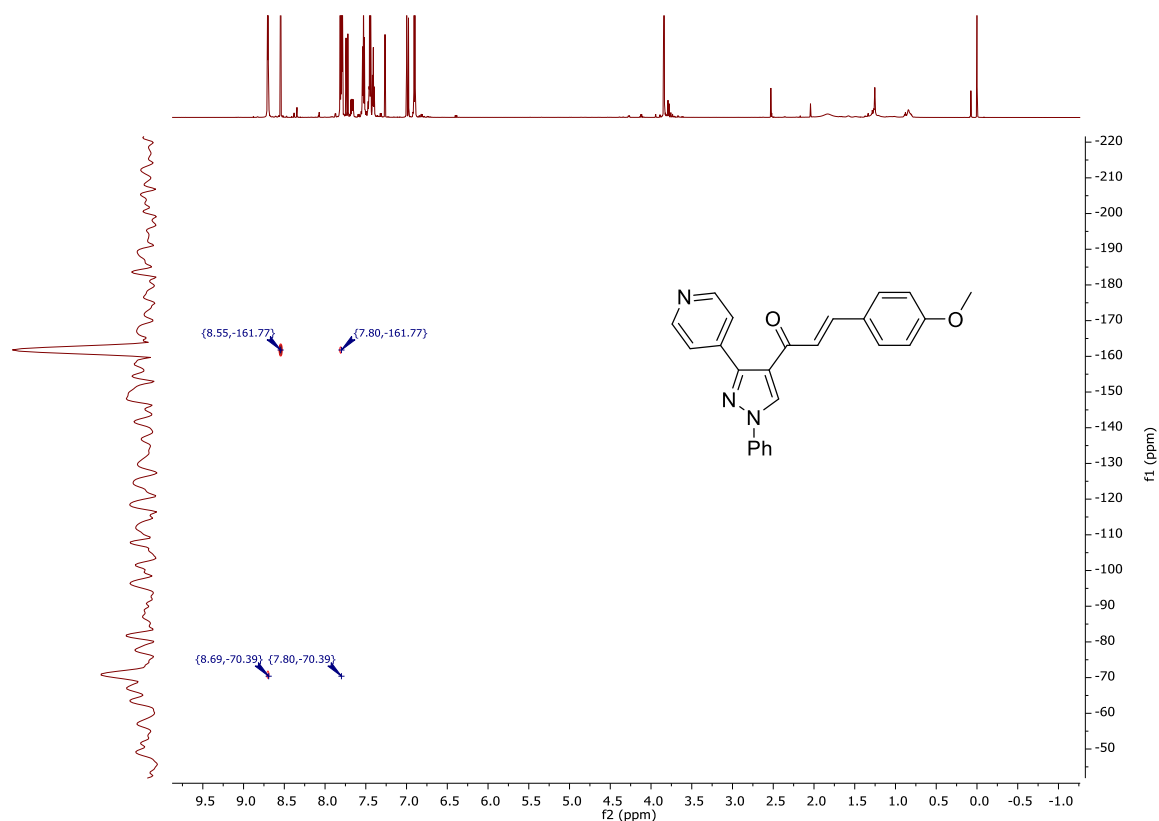

**Figure S179.** (2E)-3-(4-Methoxyphenyl)-1-[1-phenyl-3-(pyridin-4-yl)-1H-pyrazol-4-yl]prop-2-en-1-one (12j).  $^1\text{H}$ - $^{15}\text{N}$  HMBC NMR spectrum (71 MHz,  $\text{CDCl}_3$ )

**+MS, 4.8min #285**

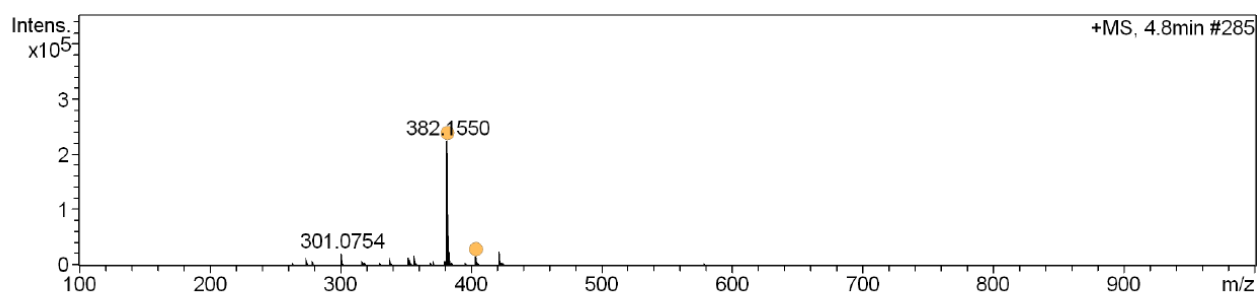

| Meas. m/z | # | Ion Formula                                                     | m/z      | err [ppm] | mSigma | # Sigma | Score  | rdb  | e <sup>-</sup> Conf | N-Rule |
|-----------|---|-----------------------------------------------------------------|----------|-----------|--------|---------|--------|------|---------------------|--------|
| 382.1550  | 1 | C <sub>24</sub> H <sub>20</sub> N <sub>3</sub> O <sub>2</sub>   | 382.1550 | -0.1      | 4.9    | 1       | 100.00 | 16.5 | even                | ok     |
| 404.1357  | 1 | C <sub>24</sub> H <sub>19</sub> N <sub>3</sub> NaO <sub>2</sub> | 404.1369 | 3.2       | 21.2   | 1       | 100.00 | 16.5 | even                | ok     |

**Figure S180.** (2E)-3-(4-Methoxyphenyl)-1-[1-phenyl-3-(pyridin-4-yl)-1H-pyrazol-4-yl]prop-2-en-1-one (12j). HRMS (ESI-TOF).

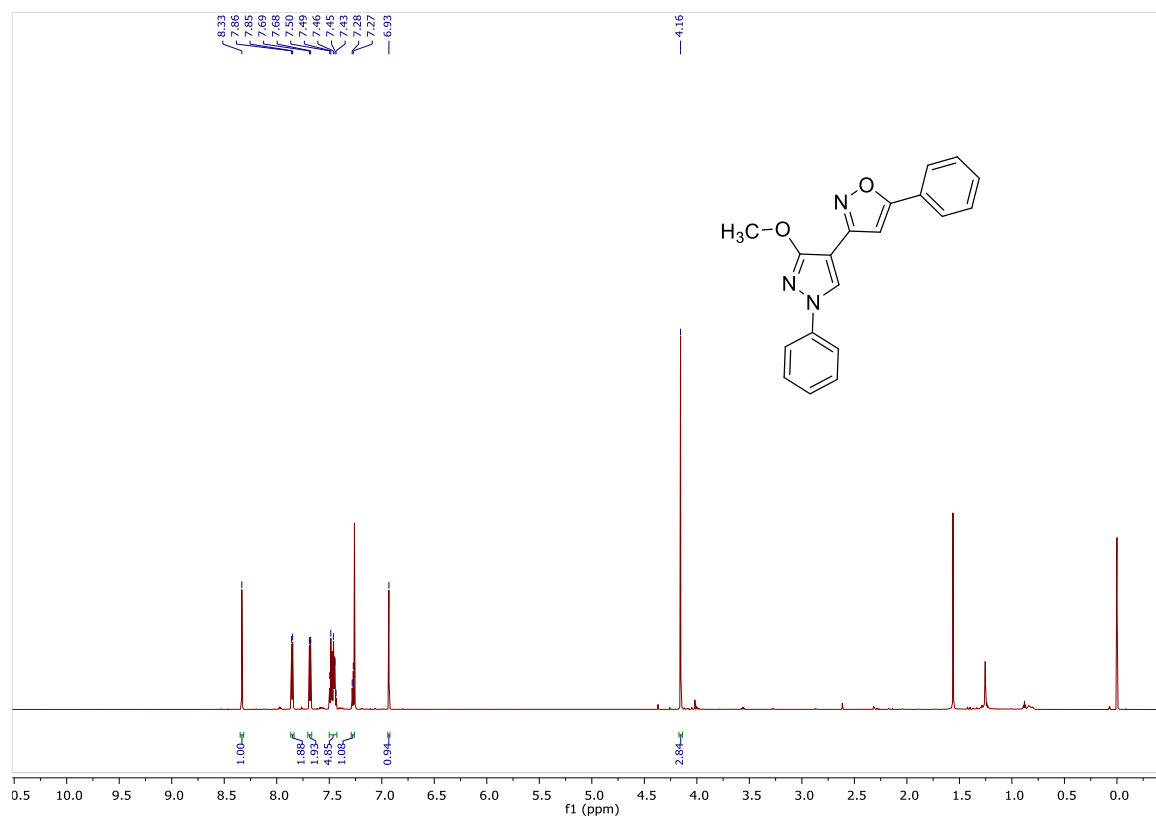

**Figure S181.** 3-(3-Methoxy-1-phenyl-1*H*-pyrazol-4-yl)-5-phenyl-1,2-oxazole (14). <sup>1</sup>H NMR spectrum (700 MHz, CDCl<sub>3</sub>)

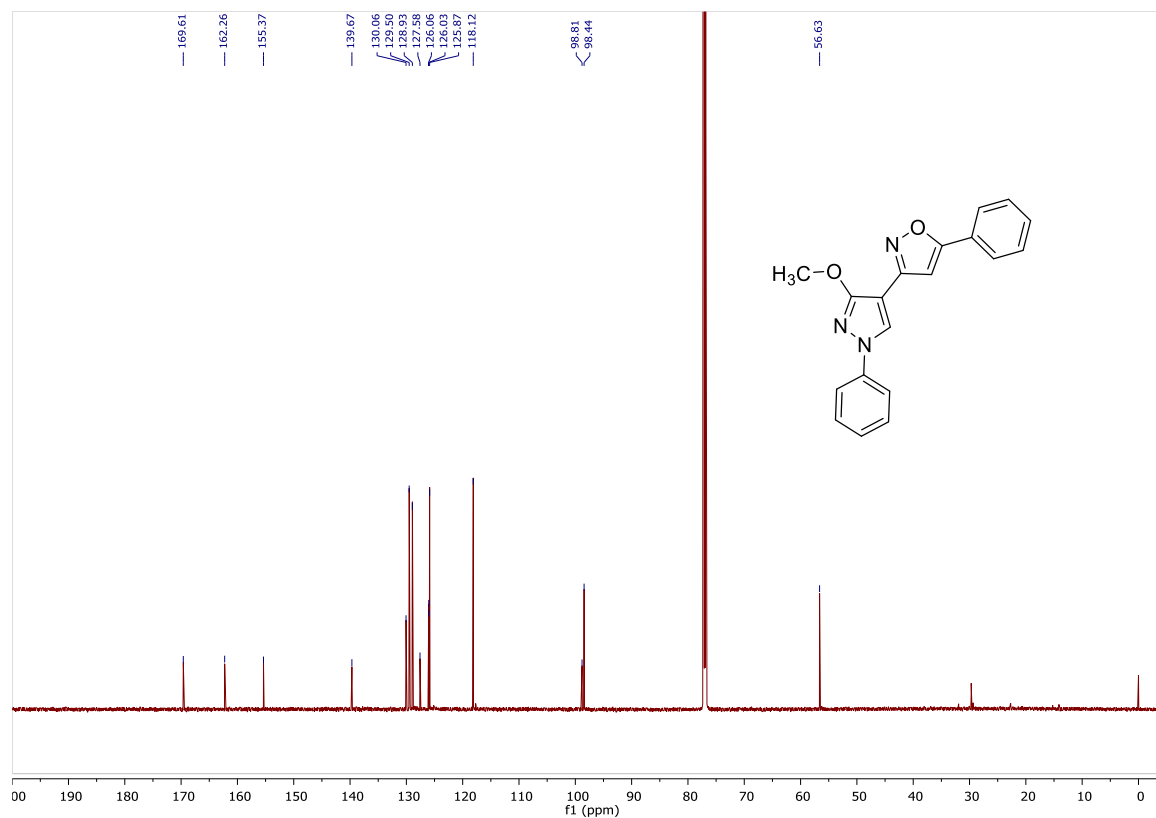

**Figure S182.** 3-(3-Methoxy-1-phenyl-1*H*-pyrazol-4-yl)-5-phenyl-1,2-oxazole (14). <sup>13</sup>C NMR spectrum (176 MHz, CDCl<sub>3</sub>)



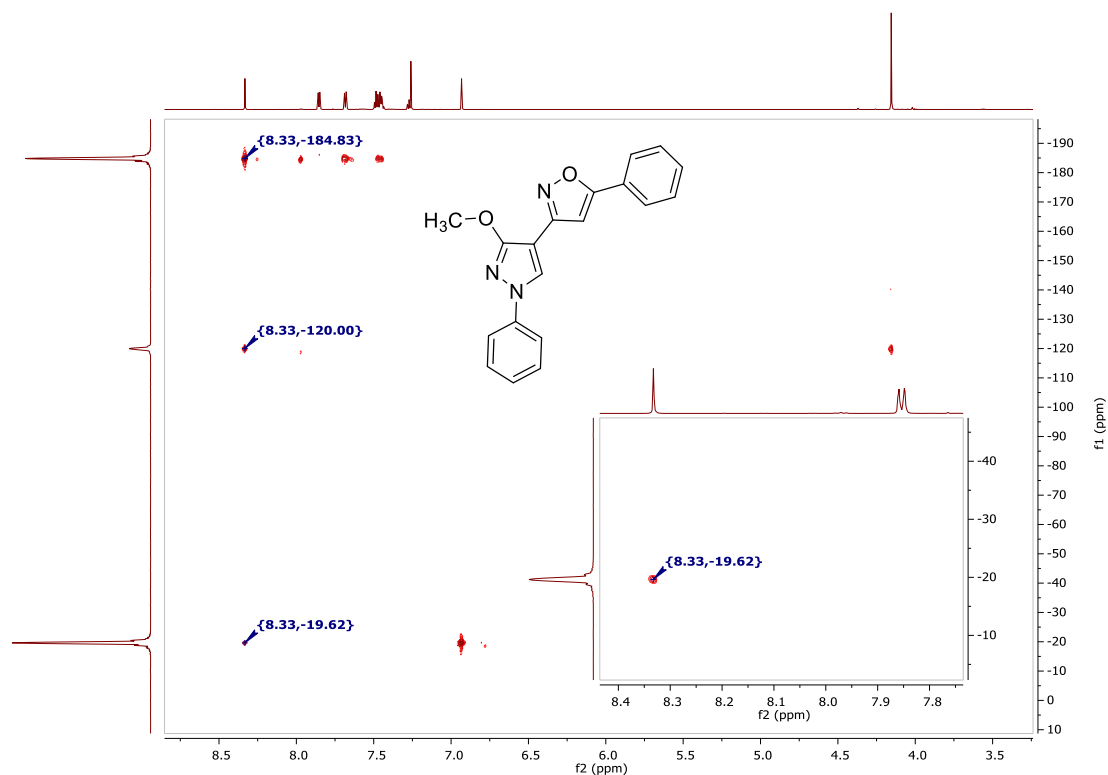

Figure S183. 3-(3-Methoxy-1-phenyl-1*H*-pyrazol-4-yl)-5-phenyl-1,2-oxazole (14).  $^1\text{H}$ - $^{15}\text{N}$  HMBC NMR spectrum (71 MHz,  $\text{CDCl}_3$ )

+MS, 6.4min #382

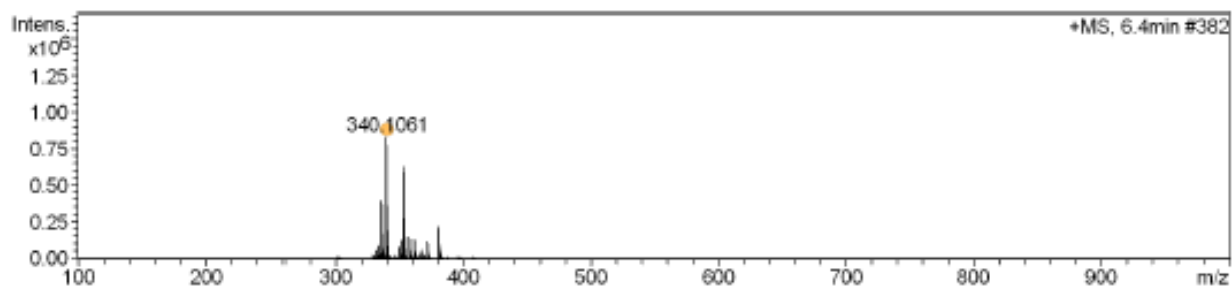

| Meas. m/z | # | Ion Formula                                                     | m/z      | err [ppm] | mSigma | # Sigma | Score  | rdb  | e <sup>-</sup> | Conf | N-Rule |
|-----------|---|-----------------------------------------------------------------|----------|-----------|--------|---------|--------|------|----------------|------|--------|
| 340.1061  | 1 | C <sub>19</sub> H <sub>15</sub> N <sub>3</sub> NaO <sub>2</sub> | 340.1056 | -1.3      | 17.1   | 2       | 100.00 | 13.5 | even           |      | ok     |

Figure S184. 3-(3-Methoxy-1-phenyl-1*H*-pyrazol-4-yl)-5-phenyl-1,2-oxazole (14). HRMS (ESI-TOF).

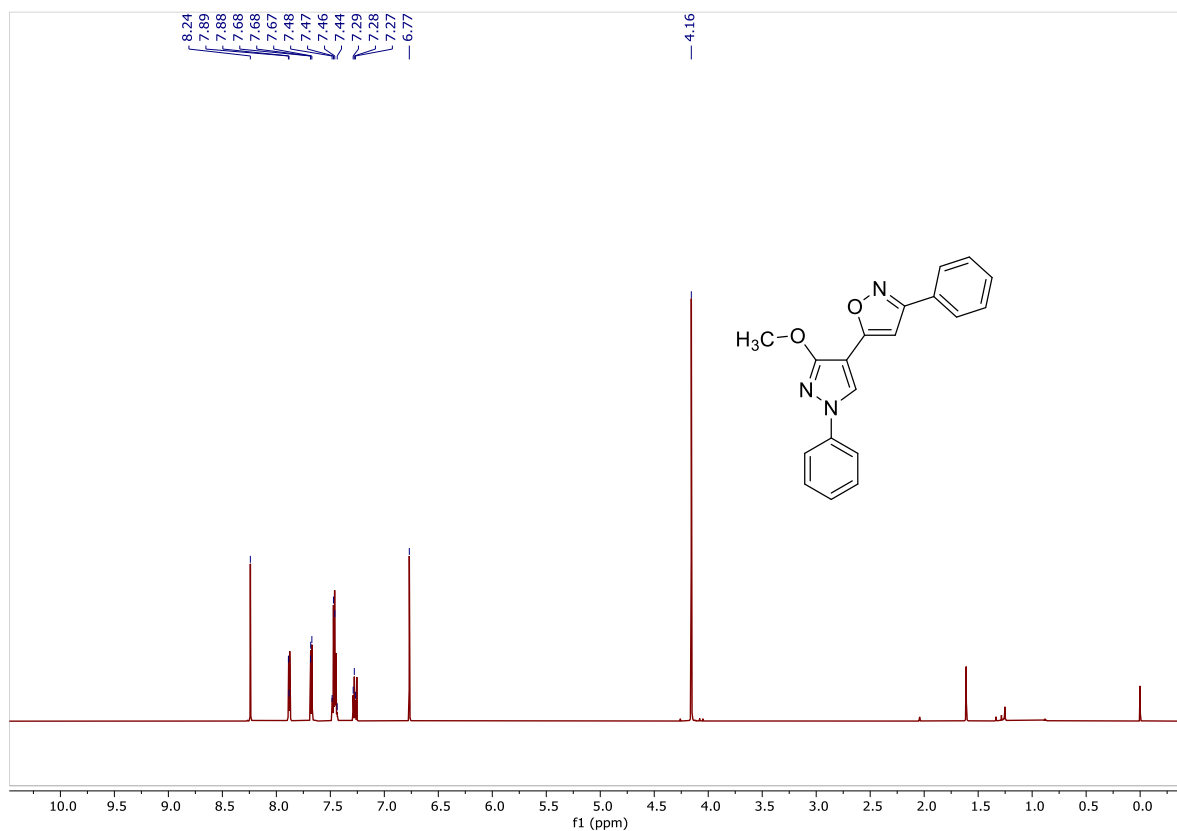

**Figure S185.** 5-(3-Methoxy-1-phenyl-1H-pyrazol-4-yl)-3-phenyl-1,2-oxazole (15). <sup>1</sup>H NMR spectrum (700 MHz, CDCl<sub>3</sub>)

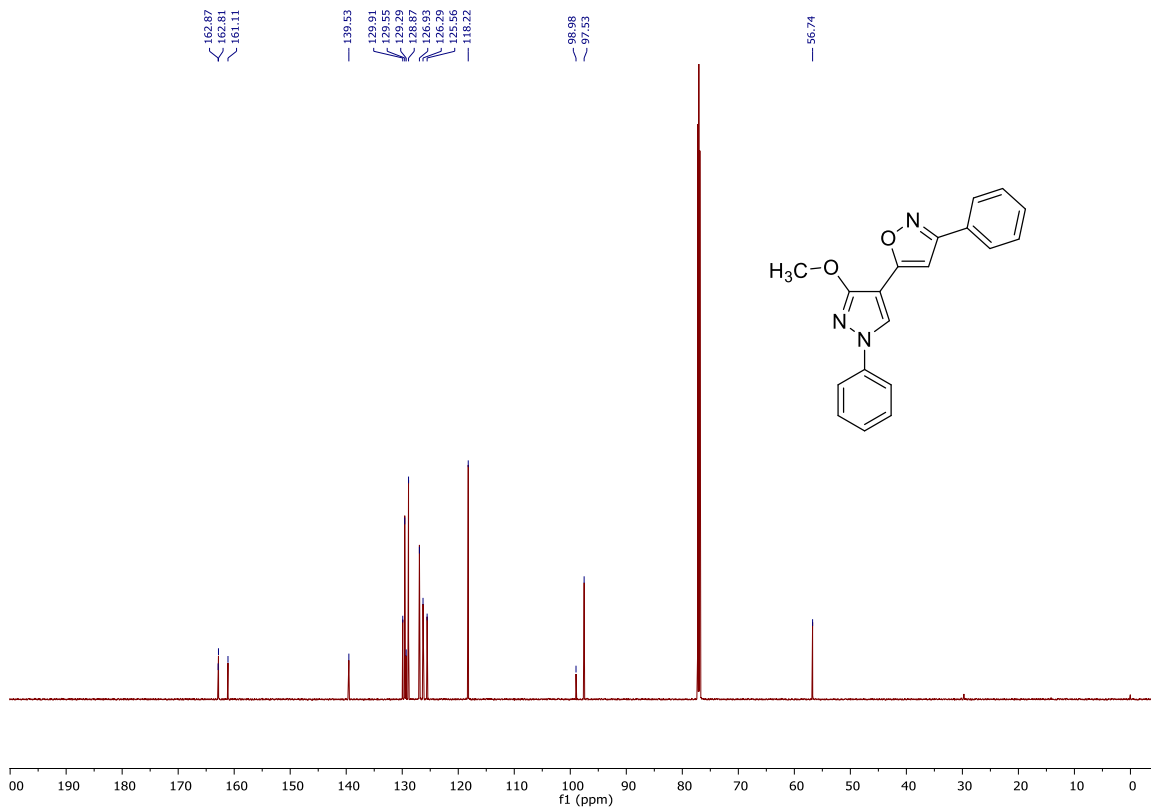

**Figure S186.** 5-(3-Methoxy-1-phenyl-1H-pyrazol-4-yl)-3-phenyl-1,2-oxazole (15). <sup>13</sup>C NMR spectrum (176 MHz, CDCl<sub>3</sub>)

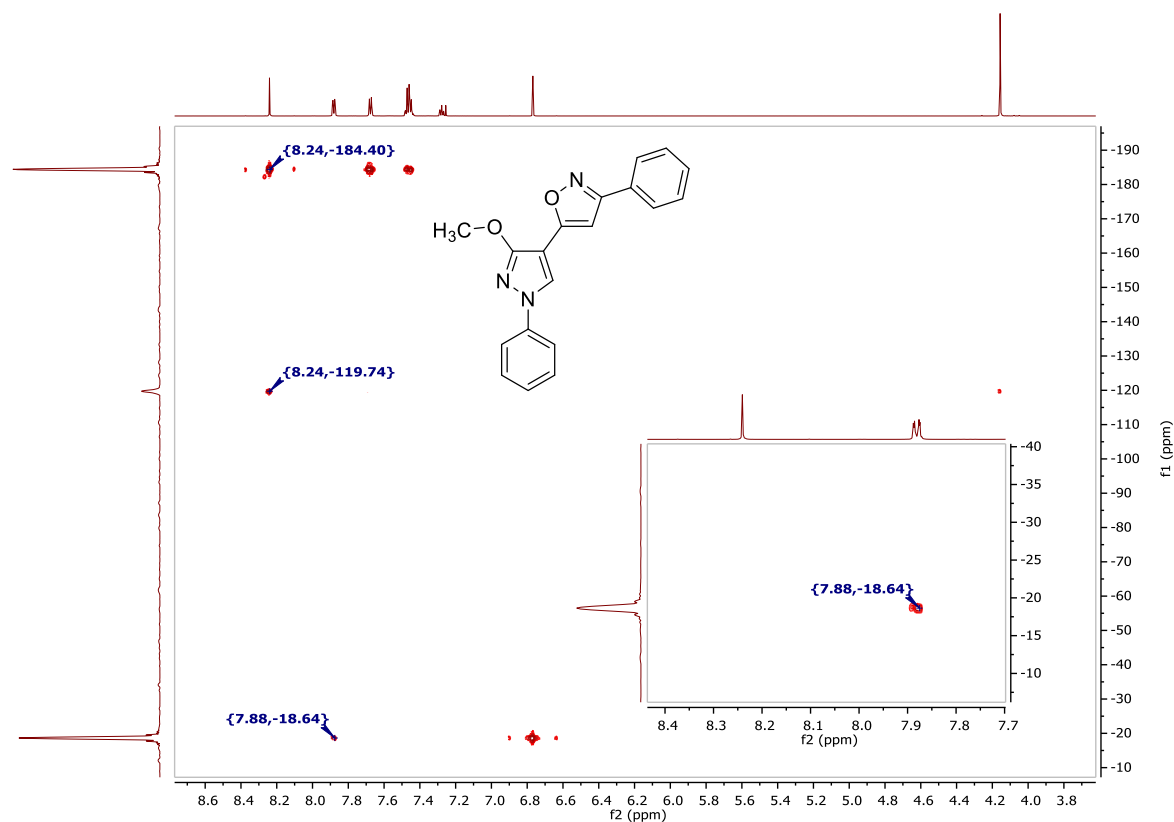

Figure S187. 5-(3-Methoxy-1-phenyl-1*H*-pyrazol-4-yl)-3-phenyl-1,2-oxazole (15).  $^1\text{H}$ - $^{15}\text{N}$  HMBC NMR spectrum (71 MHz,  $\text{CDCl}_3$ )

+MS, 4.5min #269

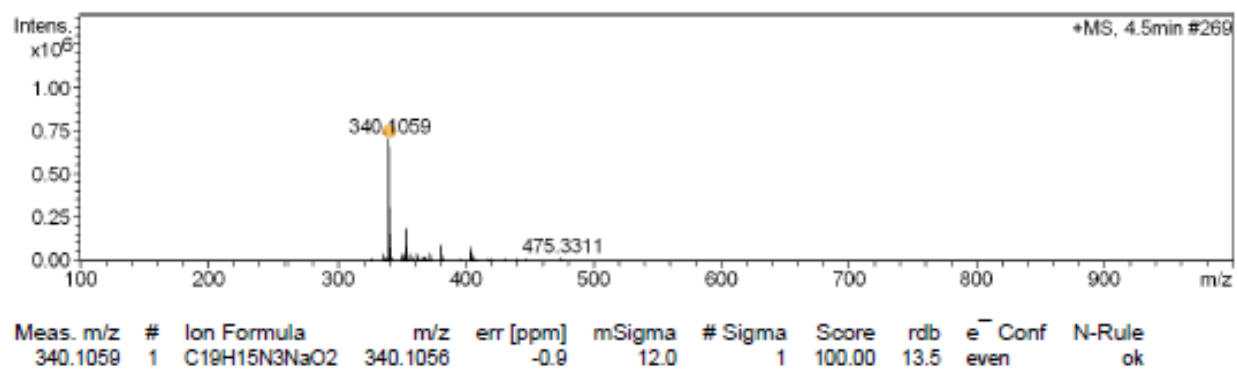

Figure S188. 5-(3-Methoxy-1-phenyl-1*H*-pyrazol-4-yl)-3-phenyl-1,2-oxazole (15). HRMS (ESI-TOF).

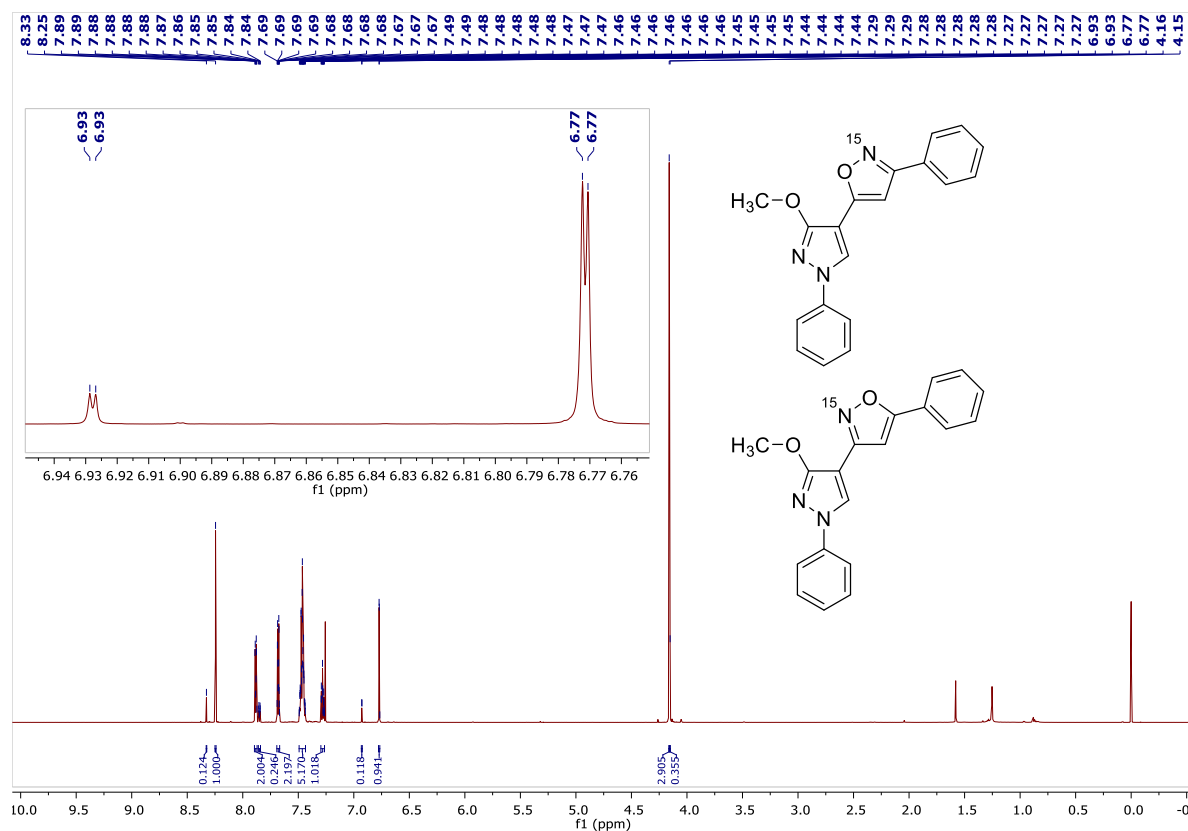

**Figure S189.** 3(5)-(3-Methoxy-1-phenyl-1*H*-pyrazol-4-yl)-(5)3-phenyl-<sup>15</sup>N-1,2-oxazole (mixture of 16, 17). <sup>1</sup>H NMR spectrum (700 MHz, CDCl<sub>3</sub>)

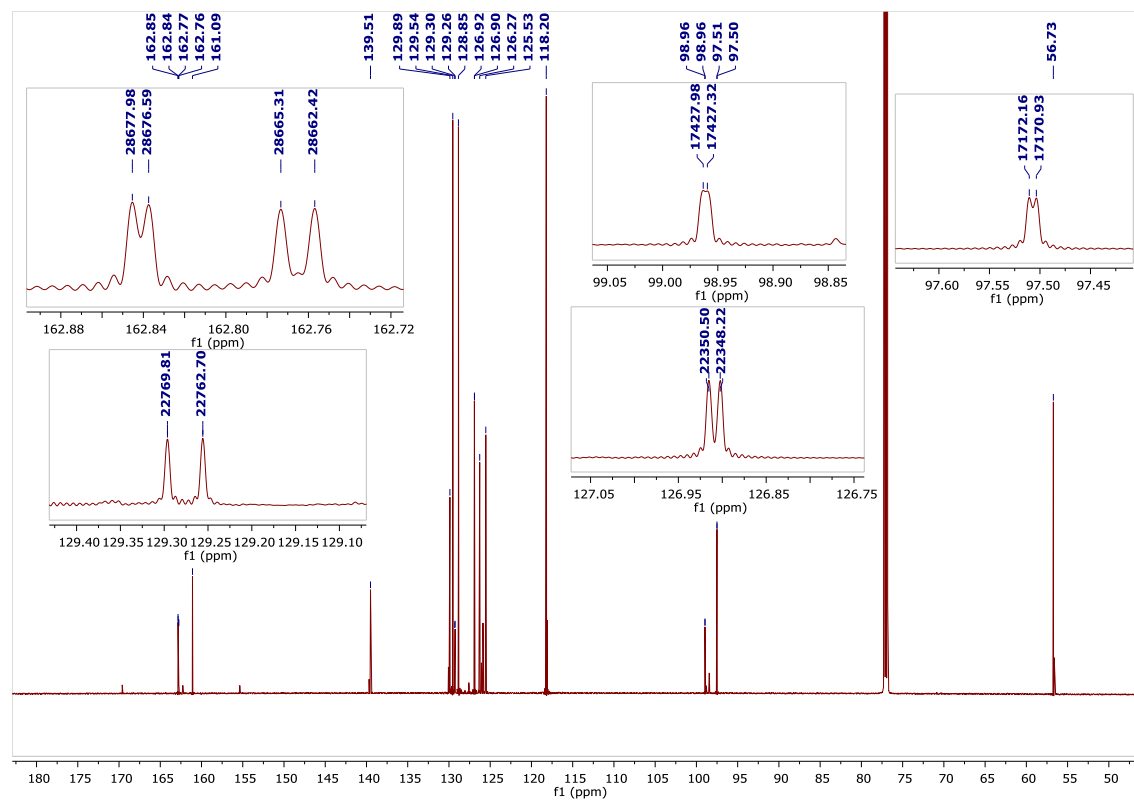

**Figure S190.** 3(5)-(3-Methoxy-1-phenyl-1*H*-pyrazol-4-yl)-(5)3-phenyl-<sup>15</sup>N-1,2-oxazole (mixture of 16, 17), signals of major regioisomer 16. <sup>13</sup>C NMR spectrum (176 MHz, CDCl<sub>3</sub>)

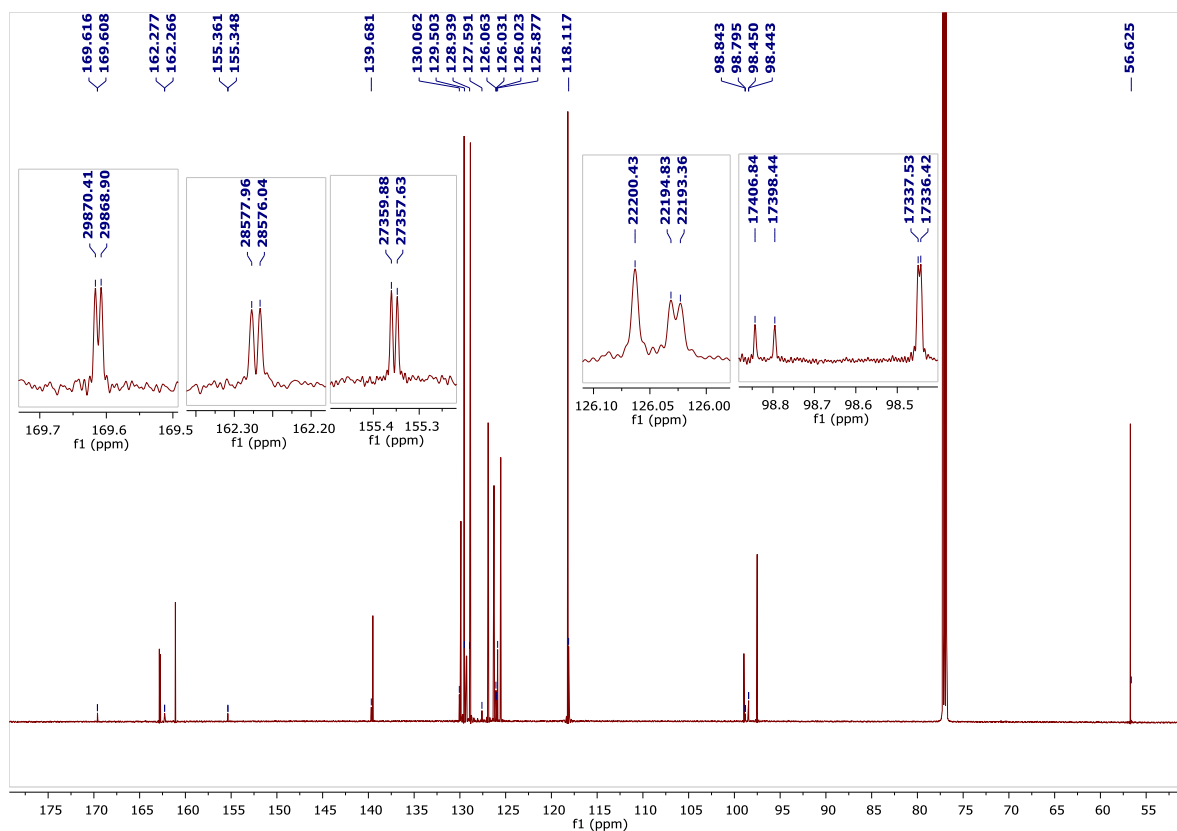

**Figure S191.** 3(5)-(3-Methoxy-1-phenyl-1*H*-pyrazol-4-yl)-(5)3-phenyl-<sup>15</sup>N-1,2-oxazole (mixture of 16, 17), signals of minor regioisomer 17. <sup>13</sup>C NMR spectrum (176 MHz, CDCl<sub>3</sub>)

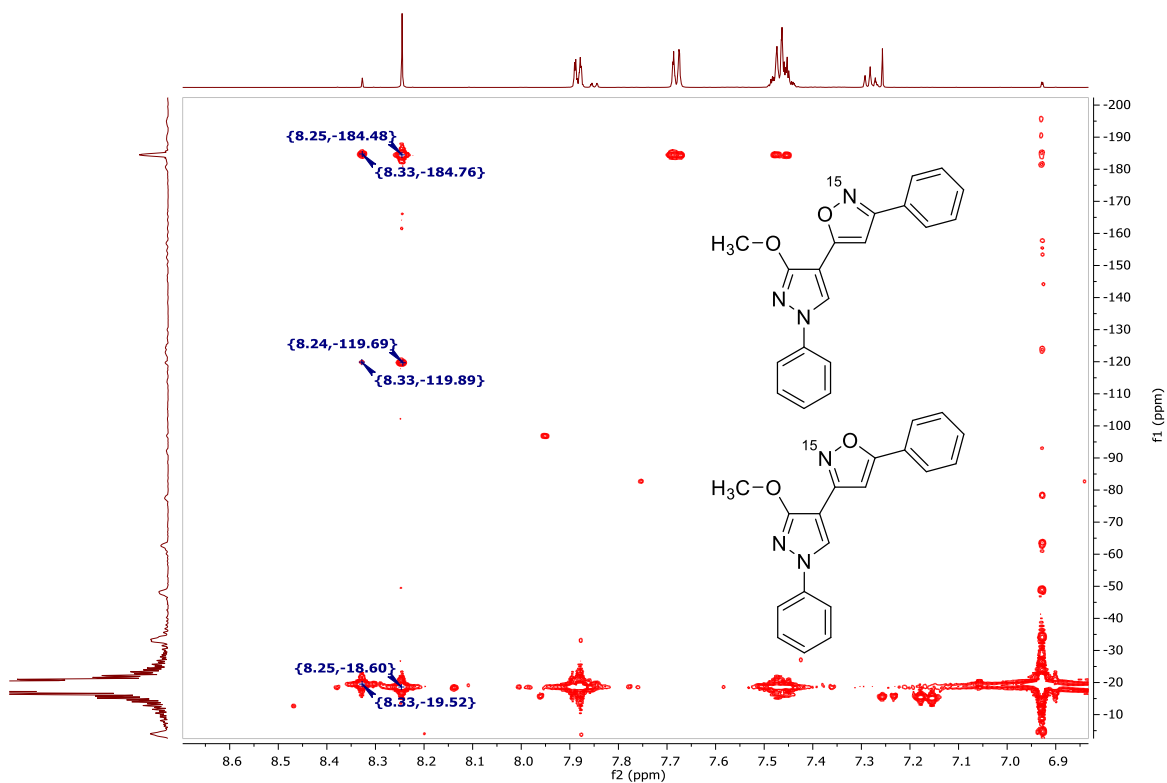

**Figure S192.** 3(5)-(3-Methoxy-1-phenyl-1*H*-pyrazol-4-yl)-(5)3-phenyl-<sup>15</sup>N-1,2-oxazole (mixture of 16, 17). <sup>1</sup>H-<sup>15</sup>N HMBC NMR spectrum (71 MHz, CDCl<sub>3</sub>)

+MS, 11.4min #681

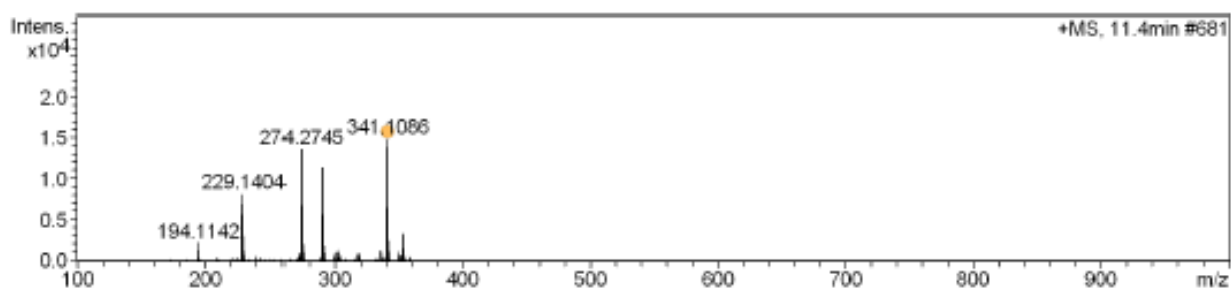

| Meas. m/z | # | Ion Formula                                                     | m/z      | err [ppm] | mSigma | # Sigma | Score | rdb  | e    | Conf | N-Rule |
|-----------|---|-----------------------------------------------------------------|----------|-----------|--------|---------|-------|------|------|------|--------|
| 341.1086  | 1 | C <sub>19</sub> H <sub>15</sub> N <sub>3</sub> NaO <sub>2</sub> | 340.1056 | -0.2      | 731.9  | 6       | 0.00  | 13.5 | even |      | ok     |

Figure S193. 3(5)-(3-Methoxy-1-phenyl-1*H*-pyrazol-4-yl)-(5)3-phenyl-<sup>15</sup>N-1,2-oxazole (mixture of 16, 17). HRMS (ESI-TOF).

### <Chromatogram>

mAU

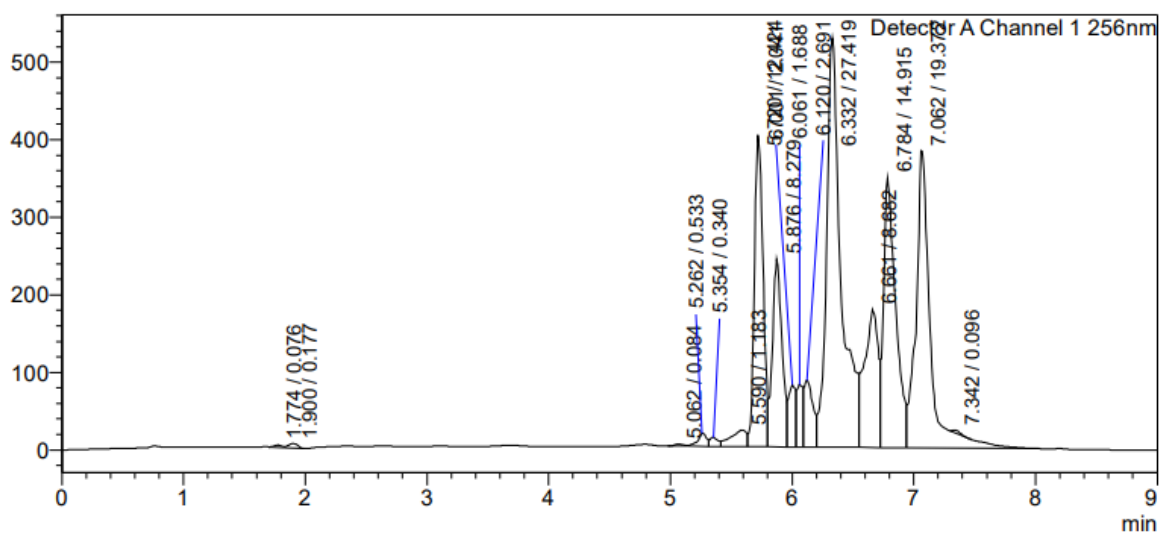

Figure S194. HPLC data of crude reaction mixture of compounds 14,15.

Line#:10 R.Time:7.100(Scan#:1279)  
MassPeaks:384  
Spectrum Mode:Averaged 7.083-7.117(1276-1282) Base Peak:564(423388)  
BG Mode:Calc Segment 1 - Event 1

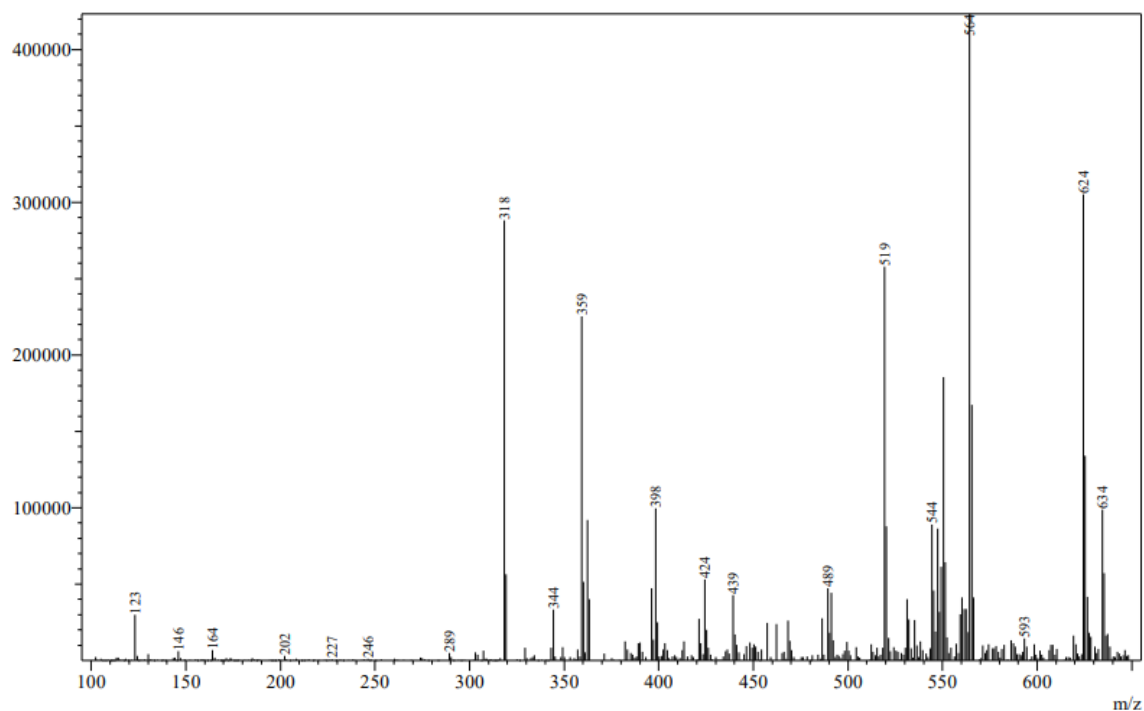

**Figure S195.** MS data of crude reaction mixture of compounds 14,15 (peak retention time 7.1 min.).

Line#:6 R.Time:6.333(Scan#:1141)  
MassPeaks:197  
Spectrum Mode:Averaged 6.317-6.350(1138-1144) Base Peak:382(4412462)  
BG Mode:Calc Segment 1 - Event 1

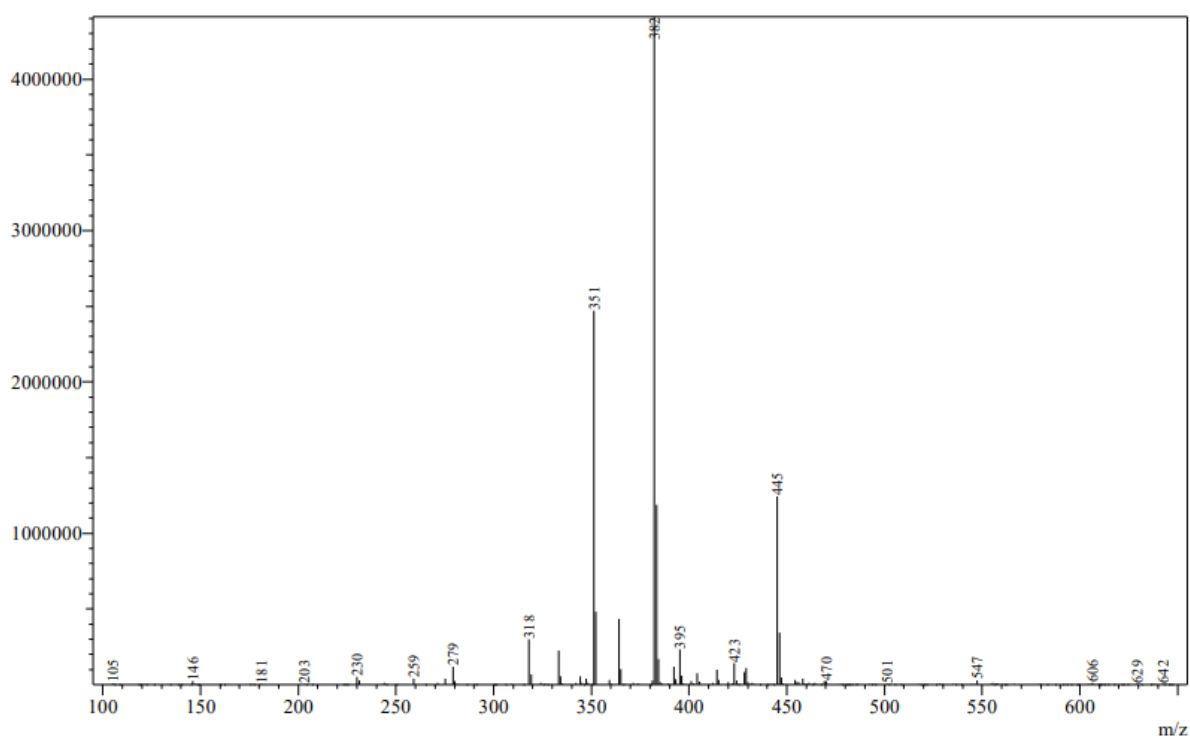

**Figure S196.** MS data of crude reaction mixture of compounds 14,15 (peak retention time 6.3 min.).

Line#:7 R.Time:6.650(Scan#:1198)  
 MassPeaks:224  
 Spectrum Mode:Averaged 6.633-6.667(1195-1201) Base Peak:320(1027526)  
 BG Mode:Calc Segment 1 - Event 1

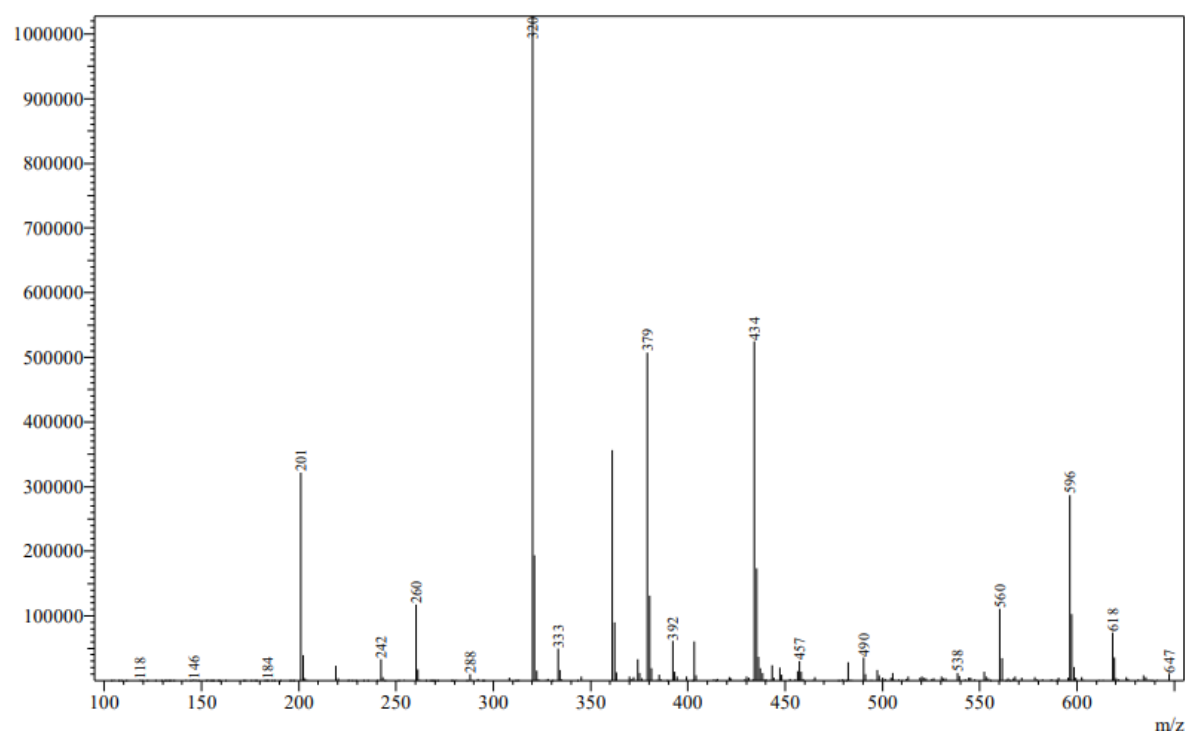

**Figure S197. MS data of crude reaction mixture of compounds 14,15 (peak retention time 6.6 min.).**

Line#:8 R.Time:6.750(Scan#:1216)  
 MassPeaks:251  
 Spectrum Mode:Averaged 6.733-6.767(1213-1219) Base Peak:320(925279)  
 BG Mode:Calc Segment 1 - Event 1

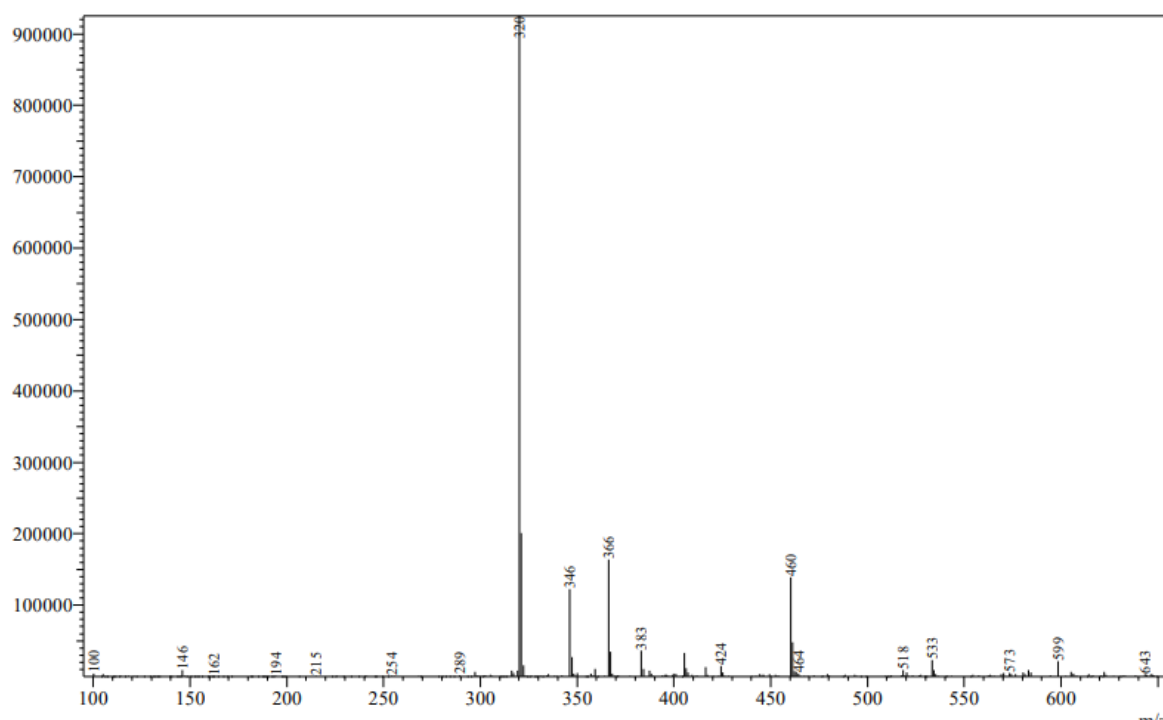

**Figure S198. MS data of crude reaction mixture of compounds 14,15 (peak retention time 6.7 min.).**
